# Supplementary material for: Novel Evolutionary Engineering Approach to Alter Substrate Specificity of Disaccharide Transporter Mal11 in Saccharomyces cerevisiae
Source: MDPI journal article supplement (doi:10.3390/jof8040358), 2022-03-30
Supplement: s1 [file s1]

## Supplementary materials

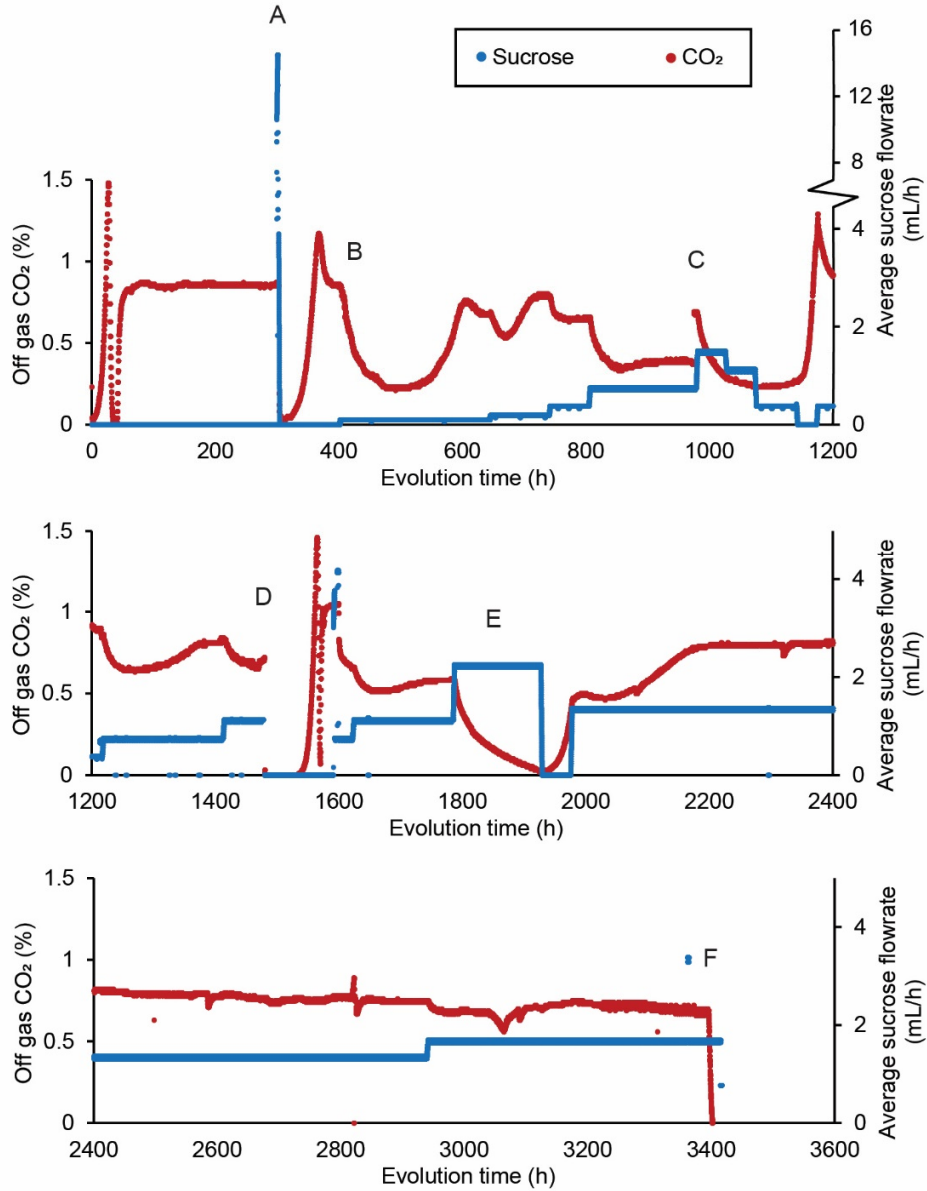

**Figure S1:** CO<sub>2</sub> concentrations in the reactor off gas and average flowrate of a 500 g L<sup>-1</sup> sucrose solution during adaptive laboratory evolution of IMZ786 (*sugar<sup>0</sup> MAL11*) in anaerobic glucose-limited chemostats with pulse-wise addition of sucrose. The off gas CO<sub>2</sub> concentrations were used as a read-out to monitor growth. One representative of the two independent evolution experiments is shown. A: After a stable CO<sub>2</sub> concentration of ~0.83% in the reactor off gas was observed, sucrose was administered separately to the culture at an average flowrate of 16 mL h<sup>-1</sup>. At this average flowrate, the CO<sub>2</sub> concentration decreased to zero. To subsequently prevent washout of cells

and allow for evolution, the addition of sucrose was temporarily stopped. **B:** After ~400 h, the average sucrose flowrate was set to 0.09 mL h<sup>-1</sup>. This resulted in a decrease of the off-gas CO<sub>2</sub> concentration to a value of 0.22%. **C:** After 975 hours, there was a temporal disturbance (increase) in the constant medium flowrate as a new medium vessel was connected, resulting in a sudden peak in off gas CO<sub>2</sub> concentration (0.63%, whereas before connection of the medium vessel it was relatively stable at ~0.37%). After this peak, the ever-decreasing CO<sub>2</sub> concentration motivated the decision to decrease the average sucrose flowrate stepwise, until an increase of the CO<sub>2</sub> concentration was once again observed as no more sucrose was added. **D:** Due to laboratory maintenance, the cultures were temporarily stocked and terminated. After approximately one month, these stocks were used to proceed with the evolution. **E:** The average sucrose flowrate (2.2 mL h<sup>-1</sup>) set after ~1785 h resulted in gradual wash-out of cells, as can be observed from the decreasing off gas CO<sub>2</sub> concentration (from 0.58% to 0.02%). Addition of sucrose was therefore temporarily stopped to allow for accumulation of biomass, after which the average flowrate of the sucrose solution was adjusted to a lower setting that still permitted sufficient growth. **F:** After ~3400 h, aliquots of the cultures were stocked and the evolution experiment was terminated.

**Separate excel files for Supplementary Data S1 and Supplementary Data S2 have been included.**
