# Supplementary material for: Novel Evolutionary Engineering Approach to Alter Substrate Specificity of Disaccharide Transporter Mal11 in Saccharomyces cerevisiae
Source: J Fungi (Basel). 2022 Mar 30;8(4):358. doi: 10.3390/jof8040358 (PMC9024999; doi:10.3390/jof8040358)
Supplement: Supplementary file 1 [file jof-08-00358-s001.zip › Supplementary Data S1.xlsx]

## Sheet: Read_me
Age (h)	Duration of the evolution experiment. Time during which the reactors were not operational due to laboratory maintenance was not taken into account for this duration.
m_do	Dissolved oxygen concentration (% of air saturation at ambient pressure)
m_ph	Culture pH
m_temp	Culture temperature
dm_sucrose	Dose monitor of pump for 50% sucrose addition
mL sucrose added	Volume of 50% (w/v) sucrose solution added, calculated from dm_sucrose. The relation between dm_sucrose and volume of sucrose solution can be found for each replicate in tab 'Replicate [X] Cal DM Suc' and was determined from multiple measurements of the weight of the 50% sucrose reservoir and the corresponding values of the dose monitor.
Average sucrose flowrate (mL/h)	Average flowrate of 50% (w/v) sucrose solution, calculated over the respective time point and the following two hours
dm_base	Dose monitor of pump for automated addition of 2M KOH for maintaining culture pH.
dm_level	Dose monitor of effluent pump for maintaining stable culture volume
CO2	Percentage CO2 in reactor off-gas
O2	Percentage O2 in reactor off-gas

## Sheet: Replicate 1
Timestamp	Age (h)	m_do	m_ph	m_temp	dm_sucrose	mL sucrose added	Average sucrose flowrate (mL/h)	dm_base	dm_level	CO2	O2
04-05-2021 17:40:42	0	0	5.27	30	0	-0.0109189	0	3659.8	636211	0.03	21.1
04-05-2021 17:41:39	0.0158333	0	5.27	30	0	-0.0109189	0	3659.8	636211	0.03	21.1
04-05-2021 17:42:39	0.0325	0	5.27	30	0	-0.0109189	0	3659.8	636211	0.03	21.1
04-05-2021 17:43:39	0.0491667	0	5.27	30	0	-0.0109189	0	3659.8	636211	-0.15	20.5
04-05-2021 17:44:39	0.0658333	0	5.27	30	0	-0.0109189	0	3659.8	636211	-0.15	20.5
04-05-2021 17:45:39	0.0825	0	5.27	30	0	-0.0109189	0	3659.8	636211	-0.15	20.5
04-05-2021 17:46:39	0.0991667	0	5.27	30	0	-0.0109189	0	3659.8	636211	-0.15	20.5
04-05-2021 17:47:39	0.115833	0	5.27	30	0	-0.0109189	0	3659.8	636211	-0.15	20.5
04-05-2021 17:48:39	0.1325	0	5.27	30	0	-0.0109189	0	3659.8	636211	-0.15	20.5
04-05-2021 17:49:39	0.149167	0	5.27	30	0	-0.0109189	0	3659.8	636211	-0.15	20.5
04-05-2021 17:50:39	0.165833	0	5.27	30	0	-0.0109189	0	3659.8	636211	-0.15	20.5
04-05-2021 17:51:39	0.1825	0	5.27	30	0	-0.0109189	0	3659.8	636211	-0.15	20.5
04-05-2021 17:52:39	0.199167	0	5.27	30	0	-0.0109189	0	3659.8	636211	-0.15	20.5
04-05-2021 17:53:39	0.215833	0	5.27	30	0	-0.0109189	0	3659.8	636211	-0.15	20.5
04-05-2021 17:54:39	0.2325	0	5.27	30	0	-0.0109189	0	3659.8	636211	-0.15	20.5
04-05-2021 17:55:39	0.249167	0	5.27	30	0	-0.0109189	0	3659.8	636211	-0.15	20.5
04-05-2021 17:56:39	0.265833	0	5.27	30	0	-0.0109189	0	3659.8	636211	-0.15	20.5
04-05-2021 17:57:39	0.2825	0	5.27	30	0	-0.0109189	0	3659.8	636211	-0.15	20.5
04-05-2021 17:58:39	0.299167	0	5.27	30	0	-0.0109189	0	3659.8	636211	-0.15	20.5
04-05-2021 17:59:39	0.315833	0	5.27	30	0	-0.0109189	0	3659.8	636211	-0.15	20.5
04-05-2021 18:00:39	0.3325	0.4	5.28	29.7	0	-0.0109189	0	3659.8	636211	-0.15	20.5
04-05-2021 18:01:39	0.349167	0.2	5.28	29.7	0	-0.0109189	0	3659.8	636211	-0.15	20.5
04-05-2021 18:02:39	0.365833	0.1	5.29	29.6	0	-0.0109189	0	3659.8	636211	-0.15	20.5
04-05-2021 18:03:39	0.3825	0	5.29	29.7	0	-0.0109189	0	3659.8	636211	-0.15	20.5
04-05-2021 18:04:39	0.399167	0	5.29	29.9	0	-0.0109189	0	3659.8	636211	-0.15	20.5
04-05-2021 18:05:39	0.415833	0	5.29	30.1	0	-0.0109189	0	3659.8	636211	-0.15	20.5
04-05-2021 18:06:39	0.4325	0	5.32	30.2	0	-0.0109189	0	3659.8	636211	-0.15	20.5
04-05-2021 18:07:39	0.449167	0	5.32	30.2	0	-0.0109189	0	3659.8	636211	-0.15	20.5
04-05-2021 18:08:39	0.465833	0	5.32	30.2	0	-0.0109189	0	0	636211	-0.15	20.5
04-05-2021 18:09:39	0.4825	0	5.32	30.2	0	-0.0109189	0	0	636211	-0.15	20.5
04-05-2021 18:10:39	0.499167	0	5.31	30.2	0	-0.0109189	0	0	636211	-0.15	20.5
04-05-2021 18:11:39	0.515833	0	5.31	30.1	0	-0.0109189	0	0	636211	-0.15	20.5
04-05-2021 18:12:39	0.5325	0	5.31	30.1	0	-0.0109189	0	0	636211	-0.15	20.5
04-05-2021 18:13:39	0.549167	0	5.31	30	0	-0.0109189	0	0	636211	-0.15	20.5
04-05-2021 18:14:39	0.565833	0	5.31	30	0	-0.0109189	0	0	636211	-0.15	20.5
04-05-2021 18:15:39	0.5825	0	5.31	30	0	-0.0109189	0	0	636211	-0.15	20.5
04-05-2021 18:16:39	0.599167	0	5.31	30	0	-0.0109189	0	0	636211	-0.15	20.5
04-05-2021 18:17:39	0.615833	0	5.31	30	0	-0.0109189	0	0	636211	-0.15	20.5
04-05-2021 18:18:39	0.6325	0	5.31	30	0	-0.0109189	0	0	636211	-0.16	20.5
04-05-2021 18:19:39	0.649167	0	5.31	30	0	-0.0109189	0	0	636211	-0.16	20.5
04-05-2021 18:20:39	0.665833	0	5.31	30	0	-0.0109189	0	0	636211	-0.16	20.5
04-05-2021 18:21:39	0.6825	0	5.31	30	0	-0.0109189	0	0	636211	-0.16	20.5
04-05-2021 18:22:39	0.699167	0	5.31	30	0	-0.0109189	0	0	636211	-0.16	20.5
04-05-2021 18:23:39	0.715833	0	5.31	30	0	-0.0109189	0	0	636211	-0.16	20.5
04-05-2021 18:24:39	0.7325	0	5.31	30	0	-0.0109189	0	0	636211	-0.16	20.5
04-05-2021 18:25:39	0.749167	0	5.31	30	0	-0.0109189	0	0	636211	-0.16	20.5
04-05-2021 18:26:39	0.765833	0	5.31	30	0	-0.0109189	0	0	636211	-0.16	20.5
04-05-2021 18:27:39	0.7825	0	5.31	30	0	-0.0109189	0	0	636211	-0.16	20.5
04-05-2021 18:28:39	0.799167	0	5.31	30	0	-0.0109189	0	0	636211	-0.16	20.5
04-05-2021 18:29:39	0.815833	0	5.31	30	0	-0.0109189	0	0	636211	-0.16	20.5
04-05-2021 18:30:39	0.8325	0	5.31	30	0	-0.0109189	0	0	636211	-0.16	20.5
04-05-2021 18:31:39	0.849167	0	5.31	30	0	-0.0109189	0	0	636211	-0.16	20.5
04-05-2021 18:32:39	0.865833	0	5.31	30	0	-0.0109189	0	0	636211	-0.16	20.5
04-05-2021 18:33:39	0.8825	0	5.31	30	0	-0.0109189	0	0	636211	-0.16	20.5
04-05-2021 18:34:39	0.899167	0	5.31	30	0	-0.0109189	0	0	636211	-0.16	20.5
04-05-2021 18:35:39	0.915833	0	5.31	30	0	-0.0109189	0	0	636211	-0.16	20.5
04-05-2021 18:36:39	0.9325	0	5.31	30	0	-0.0109189	0	0	636211	-0.16	20.5
04-05-2021 18:37:39	0.949167	0	5.31	30	0	-0.0109189	0	0	636211	-0.16	20.5
04-05-2021 18:38:39	0.965833	0	5.31	30	0	-0.0109189	0	0	636211	-0.16	20.5
04-05-2021 18:39:39	0.9825	0	5.31	30	0	-0.0109189	0	0	636211	-0.16	20.5
04-05-2021 18:40:39	0.999167	0	5.31	30	0	-0.0109189	0	0	636211	-0.16	20.5
04-05-2021 18:41:39	1.01583	0	5.31	30	0	-0.0109189	0	0	636211	-0.16	20.5
04-05-2021 18:42:39	1.0325	0	5.31	30	0	-0.0109189	0	0	636211	-0.16	20.5
04-05-2021 18:43:39	1.04917	0	5.31	30	0	-0.0109189	0	0	636211	-0.16	20.5
04-05-2021 18:44:39	1.06583	0	5.31	30	0	-0.0109189	0	0	636211	-0.16	20.5
04-05-2021 18:45:39	1.0825	0	5.31	30	0	-0.0109189	0	0	636211	-0.16	20.5
04-05-2021 18:46:39	1.09917	0	5.31	30	0	-0.0109189	0	0	636211	-0.16	20.5
04-05-2021 18:47:39	1.11583	0	5.31	30	0	-0.0109189	0	0	636211	-0.16	20.5
04-05-2021 18:48:39	1.1325	0	5.31	30	0	-0.0109189	0	0	636211	-0.16	20.5
04-05-2021 18:49:39	1.14917	0	5.31	30	0	-0.0109189	0	0	636211	-0.16	20.5
04-05-2021 18:50:39	1.16583	0	5.31	30	0	-0.0109189	0	0	636211	-0.16	20.5
04-05-2021 18:51:39	1.1825	0	5.31	30	0	-0.0109189	0	0	636211	-0.16	20.5
04-05-2021 18:52:39	1.19917	0	5.31	30	0	-0.0109189	0	0	636211	-0.16	20.5
04-05-2021 18:53:39	1.21583	0	5.31	30	0	-0.0109189	0	0	636211	-0.16	20.5
04-05-2021 18:54:39	1.2325	0	5.31	30	0	-0.0109189	0	0	636211	-0.16	20.5
04-05-2021 18:55:39	1.24917	0	5.31	30	0	-0.0109189	0	0	636211	-0.16	20.5
04-05-2021 18:56:39	1.26583	0	5.31	30	0	-0.0109189	0	0	636211	-0.16	20.5
04-05-2021 18:57:39	1.2825	0	5.31	30	0	-0.0109189	0	0	636211	-0.16	20.5
04-05-2021 18:58:39	1.29917	0	5.31	30	0	-0.0109189	0	0	636211	-0.16	20.5
04-05-2021 18:59:39	1.31583	0	5.31	30	0	-0.0109189	0	0	636211	-0.16	20.5
04-05-2021 19:00:39	1.3325	0	5.31	30	0	-0.0109189	0	0	636211	-0.16	20.5
04-05-2021 19:01:39	1.34917	0	5.31	30	0	-0.0109189	0	0	636211	-0.16	20.5
04-05-2021 19:02:39	1.36583	0	5.31	30	0	-0.0109189	0	0	636211	-0.16	20.5
04-05-2021 19:03:39	1.3825	0	5.31	30	0	-0.0109189	0	0	636211	-0.16	20.5
04-05-2021 19:04:39	1.39917	0	5.3	30	0	-0.0109189	0	0	636211	-0.16	20.5
04-05-2021 19:05:39	1.41583	0	5.31	30	0	-0.0109189	0	0	636211	-0.16	20.5
04-05-2021 19:06:39	1.4325	0	5.31	30	0	-0.0109189	0	0	636211	-0.16	20.5
04-05-2021 19:07:39	1.44917	0	5.3	30	0	-0.0109189	0	0	636211	-0.16	20.5
04-05-2021 19:08:39	1.46583	0	5.3	30	0	-0.0109189	0	0	636211	-0.16	20.5
04-05-2021 19:09:39	1.4825	0	5.3	30	0	-0.0109189	0	0	636211	-0.16	20.5
04-05-2021 19:10:39	1.49917	0	5.3	30	0	-0.0109189	0	0	636211	-0.16	20.5
04-05-2021 19:11:39	1.51583	0	5.3	30	0	-0.0109189	0	0	636211	-0.16	20.5
04-05-2021 19:12:39	1.5325	0	5.3	30	0	-0.0109189	0	0	636211	-0.16	20.5
04-05-2021 19:13:39	1.54917	0	5.3	30	0	-0.0109189	0	0	636211	-0.16	20.5
04-05-2021 19:14:39	1.56583	0	5.3	30	0	-0.0109189	0	0	636211	-0.16	20.5
04-05-2021 19:15:39	1.5825	0	5.3	30	0	-0.0109189	0	0	636211	-0.16	20.5
04-05-2021 19:16:39	1.59917	0	5.3	30	0	-0.0109189	0	0	636211	-0.16	20.5
04-05-2021 19:17:39	1.61583	0	5.3	30	0	-0.0109189	0	0	636211	-0.16	20.5
04-05-2021 19:18:39	1.6325	0	5.3	30	0	-0.0109189	0	0	636211	-0.16	20.5
04-05-2021 19:19:39	1.64917	0	5.3	30	0	-0.0109189	0	0	636211	-0.16	20.5
04-05-2021 19:20:39	1.66583	0	5.3	30	0	-0.0109189	0	0	636211	-0.16	20.5
04-05-2021 19:21:39	1.6825	0	5.3	30	0	-0.0109189	0	0	636211	-0.16	20.5
04-05-2021 19:22:39	1.69917	0	5.3	30	0	-0.0109189	0	0	636211	-0.16	20.5
04-05-2021 19:23:39	1.71583	0	5.3	30	0	-0.0109189	0	0	636211	-0.16	20.5
04-05-2021 19:24:39	1.7325	0	5.3	30	0	-0.0109189	0	0	636211	-0.16	20.5
04-05-2021 19:25:39	1.74917	0	5.3	30	0	-0.0109189	0	0	636211	-0.16	20.5
04-05-2021 19:26:39	1.76583	0	5.3	30	0	-0.0109189	0	0	636211	-0.16	20.5
04-05-2021 19:27:39	1.7825	0	5.3	30	0	-0.0109189	0	0	636211	-0.16	20.5
04-05-2021 19:28:39	1.79917	0	5.3	30	0	-0.0109189	0	0	636211	-0.16	20.5
04-05-2021 19:29:39	1.81583	0	5.3	30	0	-0.0109189	0	0	636211	-0.16	20.5
04-05-2021 19:30:39	1.8325	0	5.3	30	0	-0.0109189	0	0	636211	-0.16	20.5
04-05-2021 19:31:39	1.84917	0	5.3	30	0	-0.0109189	0	0	636211	-0.16	20.5
04-05-2021 19:32:39	1.86583	0	5.3	30	0	-0.0109189	0	0	636211	-0.16	20.5
04-05-2021 19:33:39	1.8825	0	5.3	30	0	-0.0109189	0	0	636211	-0.16	20.5
04-05-2021 19:34:39	1.89917	0	5.3	30	0	-0.0109189	0	0	636211	-0.16	20.5
04-05-2021 19:35:39	1.91583	0	5.3	30	0	-0.0109189	0	0	636211	-0.16	20.5
04-05-2021 19:36:39	1.9325	0	5.3	30	0	-0.0109189	0	0	636211	-0.16	20.5
04-05-2021 19:37:39	1.94917	0	5.3	30	0	-0.0109189	0	0	636211	-0.16	20.5
04-05-2021 19:38:39	1.96583	0	5.3	30	0	-0.0109189	0	0	636211	-0.16	20.5
04-05-2021 19:39:39	1.9825	0	5.3	30	0	-0.0109189	0	0	636211	-0.16	20.5
04-05-2021 19:40:39	1.99917	0	5.3	30	0	-0.0109189	0	0	636211	-0.16	20.5
04-05-2021 19:41:39	2.01583	0	5.3	30	0	-0.0109189	0	0	636211	-0.16	20.5
04-05-2021 19:42:39	2.0325	0	5.3	30	0	-0.0109189	0	0	636211	-0.16	20.5
04-05-2021 19:43:39	2.04917	0	5.3	30	0	-0.0109189	0	0	636211	-0.16	20.5
04-05-2021 19:44:39	2.06583	0	5.3	30	0	-0.0109189	0	0	636211	-0.16	20.5
04-05-2021 19:45:39	2.0825	0	5.3	30	0	-0.0109189	0	0	636211	-0.16	20.5
04-05-2021 19:46:39	2.09917	0	5.3	30	0	-0.0109189	0	0	636211	-0.16	20.5
04-05-2021 19:47:39	2.11583	0	5.3	30	0	-0.0109189	0	0	636211	-0.16	20.5
04-05-2021 19:48:39	2.1325	0	5.3	30	0	-0.0109189	0	0	636211	-0.16	20.5
04-05-2021 19:49:39	2.14917	0	5.3	30	0	-0.0109189	0	0	636211	-0.16	20.5
04-05-2021 19:50:39	2.16583	0	5.3	30	0	-0.0109189	0	0	636211	-0.16	20.5
04-05-2021 19:51:39	2.1825	0	5.3	30	0	-0.0109189	0	0	636211	-0.16	20.5
04-05-2021 19:52:39	2.19917	0	5.3	30	0	-0.0109189	0	0	636211	-0.16	20.5
04-05-2021 19:53:39	2.21583	0	5.3	30	0	-0.0109189	0	0	636211	-0.16	20.5
04-05-2021 19:54:39	2.2325	0	5.29	30	0	-0.0109189	0	0	636211	-0.16	20.5
04-05-2021 19:55:39	2.24917	0	5.29	30	0	-0.0109189	0	0	636211	-0.16	20.5
04-05-2021 19:56:39	2.26583	0	5.29	30	0	-0.0109189	0	0	636211	-0.16	20.5
04-05-2021 19:57:39	2.2825	0	5.29	30	0	-0.0109189	0	0	636211	-0.16	20.5
04-05-2021 19:58:39	2.29917	0	5.29	30	0	-0.0109189	0	0	636211	-0.16	20.5
04-05-2021 19:59:39	2.31583	0	5.29	30	0	-0.0109189	0	0	636211	-0.16	20.5
04-05-2021 20:00:39	2.3325	0	5.29	30	0	-0.0109189	0	0	636211	-0.16	20.5
04-05-2021 20:01:39	2.34917	0	5.29	30	0	-0.0109189	0	0	636211	-0.16	20.5
04-05-2021 20:02:39	2.36583	0	5.29	30	0	-0.0109189	0	0	636211	-0.16	20.5
04-05-2021 20:03:39	2.3825	0	5.29	30	0	-0.0109189	0	0	636211	-0.16	20.5
04-05-2021 20:04:39	2.39917	0	5.29	30	0	-0.0109189	0	0	636211	-0.16	20.5
04-05-2021 20:05:39	2.41583	0	5.29	30	0	-0.0109189	0	0	636211	-0.16	20.5
04-05-2021 20:06:39	2.4325	0	5.29	30	0	-0.0109189	0	0	636211	-0.16	20.5
04-05-2021 20:07:39	2.44917	0	5.29	30	0	-0.0109189	0	0	636211	-0.16	20.5
04-05-2021 20:08:39	2.46583	0	5.29	30	0	-0.0109189	0	0	636211	-0.16	20.5
04-05-2021 20:09:39	2.4825	0	5.29	30	0	-0.0109189	0	0	636211	-0.16	20.5
04-05-2021 20:10:39	2.49917	0	5.31	30	0	-0.0109189	0	0	636211	-0.16	20.5
04-05-2021 20:11:39	2.51583	0	5.31	30	0	-0.0109189	0	0	636211	-0.16	20.5
04-05-2021 20:12:39	2.5325	0	5.31	30	0	-0.0109189	0	0	636211	-0.16	20.5
04-05-2021 20:13:39	2.54917	0	5.31	30	0	-0.0109189	0	0	636211	-0.16	20.5
04-05-2021 20:14:39	2.56583	0	5.31	30	0	-0.0109189	0	0	636211	-0.16	20.5
04-05-2021 20:15:39	2.5825	0	5.31	30	0	-0.0109189	0	0	636211	-0.16	20.5
04-05-2021 20:16:39	2.59917	0	5.31	30	0	-0.0109189	0	0	636211	-0.16	20.5
04-05-2021 20:17:39	2.61583	0	5.31	30	0	-0.0109189	0	0	636211	-0.16	20.5
04-05-2021 20:18:39	2.6325	0	5.31	30	0	-0.0109189	0	0	636211	-0.16	20.5
04-05-2021 20:19:39	2.64917	0	5.31	30	0	-0.0109189	0	0	636211	-0.16	20.5
04-05-2021 20:20:39	2.66583	0	5.31	30	0	-0.0109189	0	0	636211	-0.16	20.5
04-05-2021 20:21:39	2.6825	0	5.31	30	0	-0.0109189	0	0	636211	-0.16	20.5
04-05-2021 20:22:39	2.69917	0	5.31	30	0	-0.0109189	0	0	636211	-0.16	20.5
04-05-2021 20:23:39	2.71583	0	5.31	30	0	-0.0109189	0	0	636211	-0.16	20.5
04-05-2021 20:24:39	2.7325	0	5.31	30	0	-0.0109189	0	0	636211	-0.16	20.5
04-05-2021 20:25:39	2.74917	0	5.31	30	0	-0.0109189	0	0	636211	-0.16	20.5
04-05-2021 20:26:39	2.76583	0	5.31	30	0	-0.0109189	0	0	636211	-0.16	20.5
04-05-2021 20:27:39	2.7825	0	5.31	30	0	-0.0109189	0	0	636211	-0.16	20.5
04-05-2021 20:28:39	2.79917	0	5.31	30	0	-0.0109189	0	0	636211	-0.16	20.5
04-05-2021 20:29:39	2.81583	0	5.31	30	0	-0.0109189	0	0	636211	-0.16	20.5
04-05-2021 20:30:39	2.8325	0	5.31	30	0	-0.0109189	0	0	636211	-0.16	20.5
04-05-2021 20:31:39	2.84917	0	5.31	30	0	-0.0109189	0	0	636211	-0.16	20.5
04-05-2021 20:32:39	2.86583	0	5.31	30	0	-0.0109189	0	0	636211	-0.16	20.5
04-05-2021 20:33:39	2.8825	0	5.31	30	0	-0.0109189	0	0	636211	-0.16	20.5
04-05-2021 20:34:39	2.89917	0	5.31	30	0	-0.0109189	0	0	636211	-0.16	20.5
04-05-2021 20:35:39	2.91583	0	5.31	30	0	-0.0109189	0	0	636211	-0.16	20.5
04-05-2021 20:36:39	2.9325	0	5.31	30	0	-0.0109189	0	0	636211	-0.16	20.5
04-05-2021 20:37:39	2.94917	0	5.31	30	0	-0.0109189	0	0	636211	-0.16	20.5
04-05-2021 20:38:39	2.96583	0	5.31	30	0	-0.0109189	0	0	636211	-0.16	20.5
04-05-2021 20:39:39	2.9825	0	5.31	30	0	-0.0109189	0	0	636211	-0.16	20.5
04-05-2021 20:40:39	2.99917	0	5.31	30	0	-0.0109189	0	0	636211	-0.16	20.5
04-05-2021 20:41:39	3.01583	0	5.31	30	0	-0.0109189	0	0	636211	-0.16	20.5
04-05-2021 20:42:39	3.0325	0	5.31	30	0	-0.0109189	0	0	636211	-0.16	20.5
04-05-2021 20:43:39	3.04917	0	5.3	30	0	-0.0109189	0	0	636211	-0.16	20.5
04-05-2021 20:44:39	3.06583	0	5.3	30	0	-0.0109189	0	0	636211	-0.16	20.5
04-05-2021 20:45:39	3.0825	0	5.3	30	0	-0.0109189	0	0	636211	-0.16	20.5
04-05-2021 20:46:39	3.09917	0	5.3	30	0	-0.0109189	0	0	636211	-0.16	20.5
04-05-2021 20:47:39	3.11583	0	5.3	30	0	-0.0109189	0	0	636211	-0.16	20.5
04-05-2021 20:48:39	3.1325	0	5.3	30	0	-0.0109189	0	0	636211	-0.16	20.5
04-05-2021 20:49:39	3.14917	0	5.3	30	0	-0.0109189	0	0	636211	-0.16	20.5
04-05-2021 20:50:39	3.16583	0	5.3	30	0	-0.0109189	0	0	636211	-0.16	20.5
04-05-2021 20:51:39	3.1825	0	5.3	30	0	-0.0109189	0	0	636211	-0.16	20.5
04-05-2021 20:52:39	3.19917	0	5.3	30	0	-0.0109189	0	0	636211	-0.16	20.5
04-05-2021 20:53:39	3.21583	0	5.3	30	0	-0.0109189	0	0	636211	-0.16	20.5
04-05-2021 20:54:39	3.2325	0	5.3	30	0	-0.0109189	0	0	636211	-0.16	20.5
04-05-2021 20:55:39	3.24917	0	5.3	30	0	-0.0109189	0	0	636211	-0.16	20.5
04-05-2021 20:56:39	3.26583	0	5.3	30	0	-0.0109189	0	0	636211	-0.16	20.5
04-05-2021 20:57:39	3.2825	0	5.3	30	0	-0.0109189	0	0	636211	-0.16	20.5
04-05-2021 20:58:39	3.29917	0	5.3	30	0	-0.0109189	0	0	636211	-0.16	20.5
04-05-2021 20:59:39	3.31583	0	5.3	30	0	-0.0109189	0	0	636211	-0.16	20.5
04-05-2021 21:00:39	3.3325	0	5.3	30	0	-0.0109189	0	0	636211	-0.16	20.5
04-05-2021 21:01:39	3.34917	0	5.3	30	0	-0.0109189	0	0	636211	-0.16	20.5
04-05-2021 21:02:39	3.36583	0	5.3	30	0	-0.0109189	0	0	636211	-0.16	20.5
04-05-2021 21:03:39	3.3825	0	5.3	30	0	-0.0109189	0	0	636211	-0.16	20.5
04-05-2021 21:04:39	3.39917	0	5.3	30	0	-0.0109189	0	0	636211	-0.16	20.5
04-05-2021 21:05:39	3.41583	0	5.3	30	0	-0.0109189	0	0	636211	-0.16	20.5
04-05-2021 21:06:39	3.4325	0	5.3	30	0	-0.0109189	0	0	636211	-0.16	20.5
04-05-2021 21:07:39	3.44917	0	5.3	30	0	-0.0109189	0	0	636211	-0.16	20.5
04-05-2021 21:08:39	3.46583	0	5.3	30	0	-0.0109189	0	0	636211	-0.16	20.5
04-05-2021 21:09:39	3.4825	0	5.3	30	0	-0.0109189	0	0	636211	-0.16	20.5
04-05-2021 21:10:39	3.49917	0	5.3	30	0	-0.0109189	0	0	636211	-0.16	20.5
04-05-2021 21:11:39	3.51583	0	5.3	30	0	-0.0109189	0	0	636211	-0.16	20.5
04-05-2021 21:12:39	3.5325	0	5.3	30	0	-0.0109189	0	0	636211	-0.16	20.5
04-05-2021 21:13:39	3.54917	0	5.3	30	0	-0.0109189	0	0	636211	-0.16	20.5
04-05-2021 21:14:39	3.56583	0	5.29	30	0	-0.0109189	0	0	636211	-0.16	20.5
04-05-2021 21:15:39	3.5825	0	5.29	30	0	-0.0109189	0	0	636211	-0.16	20.5
04-05-2021 21:16:39	3.59917	0	5.29	30	0	-0.0109189	0	0	636211	-0.16	20.5
04-05-2021 21:17:39	3.61583	0	5.29	30	0	-0.0109189	0	0	636211	-0.16	20.5
04-05-2021 21:18:39	3.6325	0	5.29	30	0	-0.0109189	0	0	636211	-0.16	20.5
04-05-2021 21:19:39	3.64917	0	5.29	30	0	-0.0109189	0	0	636211	-0.16	20.5
04-05-2021 21:20:39	3.66583	0	5.29	30	0	-0.0109189	0	0	636211	-0.16	20.5
04-05-2021 21:21:39	3.6825	0	5.29	30	0	-0.0109189	0	0	636211	-0.16	20.5
04-05-2021 21:22:39	3.69917	0	5.29	30	0	-0.0109189	0	0	636211	-0.16	20.5
04-05-2021 21:23:39	3.71583	0	5.29	30	0	-0.0109189	0	0	636211	-0.16	20.5
04-05-2021 21:24:39	3.7325	0	5.29	30	0	-0.0109189	0	0	636211	-0.16	20.5
04-05-2021 21:25:39	3.74917	0	5.29	30	0	-0.0109189	0	0	636211	-0.16	20.5
04-05-2021 21:26:39	3.76583	0	5.29	30	0	-0.0109189	0	0	636211	-0.16	20.5
04-05-2021 21:27:39	3.7825	0	5.29	30	0	-0.0109189	0	0	636211	-0.16	20.5
04-05-2021 21:28:39	3.79917	0	5.29	30	0	-0.0109189	0	0	636211	-0.16	20.5
04-05-2021 21:29:39	3.81583	0	5.29	30	0	-0.0109189	0	0	636211	-0.16	20.5
04-05-2021 21:30:39	3.8325	0	5.29	30	0	-0.0109189	0	0	636211	-0.16	20.5
04-05-2021 21:31:39	3.84917	0	5.29	30	0	-0.0109189	0	0	636211	-0.16	20.5
04-05-2021 21:32:39	3.86583	0	5.29	30	0	-0.0109189	0	0	636211	-0.16	20.5
04-05-2021 21:33:39	3.8825	0	5.29	30	0	-0.0109189	0	0	636211	-0.16	20.5
04-05-2021 21:34:39	3.89917	0	5.29	30	0	-0.0109189	0	0	636211	-0.16	20.5
04-05-2021 21:35:39	3.91583	0	5.29	30	0	-0.0109189	0	0	636211	-0.16	20.5
04-05-2021 21:36:39	3.9325	0	5.29	30	0	-0.0109189	0	0	636211	-0.16	20.5
04-05-2021 21:37:39	3.94917	0	5.29	30	0	-0.0109189	0	0	636211	-0.16	20.5
04-05-2021 21:38:39	3.96583	0	5.29	30	0	-0.0109189	0	0	636211	-0.16	20.5
04-05-2021 21:39:39	3.9825	0	5.29	30	0	-0.0109189	0	0	636211	-0.16	20.5
04-05-2021 21:40:39	3.99917	0	5.29	30	0	-0.0109189	0	0	636211	-0.16	20.5
04-05-2021 21:41:39	4.01583	0	5.29	30	0	-0.0109189	0	0	636211	-0.16	20.5
04-05-2021 21:42:39	4.0325	0	5.29	30	0	-0.0109189	0	0	636211	-0.16	20.5
04-05-2021 21:43:39	4.04917	0	5.28	30	0	-0.0109189	0	0	636211	-0.16	20.5
04-05-2021 21:44:39	4.06583	0	5.28	30	0	-0.0109189	0	0	636211	-0.16	20.5
04-05-2021 21:45:39	4.0825	0	5.28	30	0	-0.0109189	0	0	636211	-0.16	20.5
04-05-2021 21:46:39	4.09917	0	5.28	30	0	-0.0109189	0	0	636211	-0.16	20.5
04-05-2021 21:47:39	4.11583	0	5.28	30	0	-0.0109189	0	0	636211	-0.16	20.5
04-05-2021 21:48:39	4.1325	0	5.28	30	0	-0.0109189	0	0	636211	-0.16	20.5
04-05-2021 21:49:39	4.14917	0	5.28	30	0	-0.0109189	0	0	636211	-0.16	20.5
04-05-2021 21:50:39	4.16583	0	5.28	30	0	-0.0109189	0	0	636211	-0.16	20.5
04-05-2021 21:51:39	4.1825	0	5.28	30	0	-0.0109189	0	0	636211	-0.16	20.5
04-05-2021 21:52:39	4.19917	0	5.28	30	0	-0.0109189	0	0	636211	-0.16	20.5
04-05-2021 21:53:39	4.21583	0	5.28	30	0	-0.0109189	0	0	636211	-0.16	20.5
04-05-2021 21:54:39	4.2325	0	5.28	30	0	-0.0109189	0	0	636211	-0.16	20.5
04-05-2021 21:55:39	4.24917	0	5.28	30	0	-0.0109189	0	0	636211	-0.16	20.5
04-05-2021 21:56:39	4.26583	0	5.28	30	0	-0.0109189	0	0	636211	-0.16	20.5
04-05-2021 21:57:39	4.2825	0	5.28	30	0	-0.0109189	0	0	636211	-0.16	20.5
04-05-2021 21:58:39	4.29917	0	5.28	30	0	-0.0109189	0	0	636211	-0.16	20.5
04-05-2021 21:59:39	4.31583	0	5.28	30	0	-0.0109189	0	0	636211	-0.16	20.5
04-05-2021 22:00:39	4.3325	0	5.28	30	0	-0.0109189	0	0	636211	-0.16	20.5
04-05-2021 22:01:39	4.34917	0	5.28	30	0	-0.0109189	0	0	636211	-0.16	20.5
04-05-2021 22:02:39	4.36583	0	5.28	30	0	-0.0109189	0	0	636211	-0.16	20.5
04-05-2021 22:03:39	4.3825	0	5.28	30	0	-0.0109189	0	0	636211	-0.16	20.5
04-05-2021 22:04:39	4.39917	0	5.28	30	0	-0.0109189	0	0	636211	-0.16	20.5
04-05-2021 22:05:39	4.41583	0	5.28	30	0	-0.0109189	0	0	636211	-0.16	20.5
04-05-2021 22:06:39	4.4325	0	5.28	30	0	-0.0109189	0	0	636211	-0.16	20.5
04-05-2021 22:07:39	4.44917	0	5.28	30	0	-0.0109189	0	0	636211	-0.16	20.5
04-05-2021 22:08:39	4.46583	0	5.28	30	0	-0.0109189	0	0	636211	-0.16	20.5
04-05-2021 22:09:39	4.4825	0	5.27	30	0	-0.0109189	0	0	636211	-0.16	20.5
04-05-2021 22:10:39	4.49917	0	5.3	30	0	-0.0109189	0	0	636211	-0.16	20.5
04-05-2021 22:11:39	4.51583	0	5.3	30	0	-0.0109189	0	0	636211	-0.16	20.5
04-05-2021 22:12:39	4.5325	0	5.3	30	0	-0.0109189	0	0	636211	-0.16	20.5
04-05-2021 22:13:39	4.54917	0	5.3	30	0	-0.0109189	0	0	636211	-0.16	20.5
04-05-2021 22:14:39	4.56583	0	5.3	30	0	-0.0109189	0	0	636211	-0.16	20.5
04-05-2021 22:15:39	4.5825	0	5.3	30	0	-0.0109189	0	0	636211	-0.16	20.5
04-05-2021 22:16:39	4.59917	0	5.3	30	0	-0.0109189	0	0	636211	-0.16	20.5
04-05-2021 22:17:39	4.61583	0	5.29	30	0	-0.0109189	0	0	636211	-0.16	20.5
04-05-2021 22:18:39	4.6325	0	5.29	30	0	-0.0109189	0	0	636211	-0.16	20.5
04-05-2021 22:19:39	4.64917	0	5.29	30	0	-0.0109189	0	0	636211	-0.16	20.5
04-05-2021 22:20:39	4.66583	0	5.29	30	0	-0.0109189	0	0	636211	-0.16	20.5
04-05-2021 22:21:39	4.6825	0	5.29	30	0	-0.0109189	0	0	636211	-0.16	20.5
04-05-2021 22:22:39	4.69917	0	5.29	30	0	-0.0109189	0	0	636211	-0.16	20.5
04-05-2021 22:23:39	4.71583	0	5.29	30	0	-0.0109189	0	0	636211	-0.16	20.5
04-05-2021 22:24:39	4.7325	0	5.29	30	0	-0.0109189	0	0	636211	-0.16	20.5
04-05-2021 22:25:39	4.74917	0	5.29	30	0	-0.0109189	0	0	636211	-0.16	20.5
04-05-2021 22:26:39	4.76583	0	5.29	30	0	-0.0109189	0	0	636211	-0.16	20.5
04-05-2021 22:27:39	4.7825	0	5.29	30	0	-0.0109189	0	0	636211	-0.16	20.5
04-05-2021 22:28:39	4.79917	0	5.29	30	0	-0.0109189	0	0	636211	-0.16	20.5
04-05-2021 22:29:39	4.81583	0	5.29	30	0	-0.0109189	0	0	636211	-0.16	20.5
04-05-2021 22:30:39	4.8325	0	5.29	30	0	-0.0109189	0	0	636211	-0.16	20.5
04-05-2021 22:31:39	4.84917	0	5.29	30	0	-0.0109189	0	0	636211	-0.16	20.5
04-05-2021 22:32:39	4.86583	0	5.29	30	0	-0.0109189	0	0	636211	-0.16	20.5
04-05-2021 22:33:39	4.8825	0	5.29	30	0	-0.0109189	0	0	636211	-0.16	20.5
04-05-2021 22:34:39	4.89917	0	5.29	30	0	-0.0109189	0	0	636211	-0.16	20.5
04-05-2021 22:35:39	4.91583	0	5.29	30	0	-0.0109189	0	0	636211	-0.16	20.5
04-05-2021 22:36:39	4.9325	0	5.29	30	0	-0.0109189	0	0	636211	-0.16	20.5
04-05-2021 22:37:39	4.94917	0	5.29	30	0	-0.0109189	0	0	636211	-0.16	20.5
04-05-2021 22:38:39	4.96583	0	5.29	30	0	-0.0109189	0	0	636211	-0.16	20.5
04-05-2021 22:39:39	4.9825	0	5.29	30	0	-0.0109189	0	0	636211	-0.16	20.5
04-05-2021 22:40:39	4.99917	0	5.29	30	0	-0.0109189	0	0	636211	-0.16	20.5
04-05-2021 22:41:39	5.01583	0	5.29	30	0	-0.0109189	0	0	636211	-0.16	20.5
04-05-2021 22:42:39	5.0325	0	5.29	30	0	-0.0109189	0	0	636211	-0.16	20.5
04-05-2021 22:43:39	5.04917	0	5.29	30	0	-0.0109189	0	0	636211	-0.16	20.5
04-05-2021 22:44:39	5.06583	0	5.28	30	0	-0.0109189	0	0	636211	-0.16	20.5
04-05-2021 22:45:39	5.0825	0	5.28	30	0	-0.0109189	0	0	636211	-0.16	20.5
04-05-2021 22:46:39	5.09917	0	5.28	30	0	-0.0109189	0	0	636211	-0.16	20.5
04-05-2021 22:47:39	5.11583	0	5.28	30	0	-0.0109189	0	0	636211	-0.16	20.5
04-05-2021 22:48:39	5.1325	0	5.28	30	0	-0.0109189	0	0	636211	-0.16	20.5
04-05-2021 22:49:39	5.14917	0	5.28	30	0	-0.0109189	0	0	636211	-0.16	20.5
04-05-2021 22:50:39	5.16583	0	5.28	30	0	-0.0109189	0	0	636211	-0.16	20.5
04-05-2021 22:51:39	5.1825	0	5.28	30	0	-0.0109189	0	0	636211	-0.16	20.5
04-05-2021 22:52:39	5.19917	0	5.28	30	0	-0.0109189	0	0	636211	-0.16	20.5
04-05-2021 22:53:39	5.21583	0	5.28	30	0	-0.0109189	0	0	636211	-0.16	20.5
04-05-2021 22:54:39	5.2325	0	5.28	30	0	-0.0109189	0	0	636211	-0.16	20.5
04-05-2021 22:55:39	5.24917	0	5.28	30	0	-0.0109189	0	0	636211	-0.16	20.5
04-05-2021 22:56:39	5.26583	0	5.28	30	0	-0.0109189	0	0	636211	-0.16	20.5
04-05-2021 22:57:39	5.2825	0	5.28	30	0	-0.0109189	0	0	636211	-0.16	20.5
04-05-2021 22:58:39	5.29917	0	5.28	30	0	-0.0109189	0	0	636211	-0.16	20.5
04-05-2021 22:59:39	5.31583	0	5.28	30	0	-0.0109189	0	0	636211	-0.16	20.5
04-05-2021 23:00:39	5.3325	0	5.28	30	0	-0.0109189	0	0	636211	-0.16	20.5
04-05-2021 23:01:39	5.34917	0	5.28	30	0	-0.0109189	0	0	636211	-0.16	20.5
04-05-2021 23:02:39	5.36583	0	5.28	30	0	-0.0109189	0	0	636211	-0.16	20.5
04-05-2021 23:03:39	5.3825	0	5.28	30	0	-0.0109189	0	0	636211	-0.16	20.5
04-05-2021 23:04:39	5.39917	0	5.28	30	0	-0.0109189	0	0	636211	-0.16	20.5
04-05-2021 23:05:39	5.41583	0	5.28	30	0	-0.0109189	0	0	636211	-0.16	20.5
04-05-2021 23:06:39	5.4325	0	5.28	30	0	-0.0109189	0	0	636211	-0.16	20.5
04-05-2021 23:07:39	5.44917	0	5.28	30	0	-0.0109189	0	0	636211	-0.16	20.5
04-05-2021 23:08:39	5.46583	0	5.28	30	0	-0.0109189	0	0	636211	-0.16	20.5
04-05-2021 23:09:39	5.4825	0	5.27	30	0	-0.0109189	0	0	636211	-0.16	20.5
04-05-2021 23:10:39	5.49917	0	5.27	30	0	-0.0109189	0	0	636211	-0.16	20.5
04-05-2021 23:11:39	5.51583	0	5.27	30	0	-0.0109189	0	0	636211	-0.16	20.5
04-05-2021 23:12:39	5.5325	0	5.27	30	0	-0.0109189	0	0	636211	-0.16	20.5
04-05-2021 23:13:39	5.54917	0	5.27	30	0	-0.0109189	0	0	636211	-0.16	20.5
04-05-2021 23:14:39	5.56583	0	5.27	30	0	-0.0109189	0	0	636211	-0.16	20.5
04-05-2021 23:15:39	5.5825	0	5.27	30	0	-0.0109189	0	0	636211	-0.16	20.5
04-05-2021 23:16:39	5.59917	0	5.27	30	0	-0.0109189	0	0	636211	-0.16	20.5
04-05-2021 23:17:39	5.61583	0	5.27	30	0	-0.0109189	0	0	636211	-0.16	20.5
04-05-2021 23:18:39	5.6325	0	5.27	30	0	-0.0109189	0	0	636211	-0.16	20.5
04-05-2021 23:19:39	5.64917	0	5.27	30	0	-0.0109189	0	0	636211	-0.16	20.5
04-05-2021 23:20:39	5.66583	0	5.27	30	0	-0.0109189	0	0	636211	-0.16	20.5
04-05-2021 23:21:39	5.6825	0	5.27	30	0	-0.0109189	0	0	636211	-0.16	20.5
04-05-2021 23:22:39	5.69917	0	5.27	30	0	-0.0109189	0	0	636211	-0.16	20.5
04-05-2021 23:23:39	5.71583	0	5.27	30	0	-0.0109189	0	0	636211	-0.16	20.5
04-05-2021 23:24:39	5.7325	0	5.27	30	0	-0.0109189	0	0	636211	-0.16	20.5
04-05-2021 23:25:39	5.74917	0	5.27	30	0	-0.0109189	0	0	636211	-0.16	20.5
04-05-2021 23:26:39	5.76583	0	5.27	30	0	-0.0109189	0	0	636211	-0.16	20.5
04-05-2021 23:27:39	5.7825	0	5.27	30	0	-0.0109189	0	0	636211	-0.16	20.5
04-05-2021 23:28:39	5.79917	0	5.27	30	0	-0.0109189	0	0	636211	-0.16	20.5
04-05-2021 23:29:39	5.81583	0	5.27	30	0	-0.0109189	0	0	636211	-0.16	20.5
04-05-2021 23:30:39	5.8325	0	5.27	30	0	-0.0109189	0	0	636211	-0.16	20.5
04-05-2021 23:31:39	5.84917	0	5.27	30	0	-0.0109189	0	0	636211	-0.16	20.5
04-05-2021 23:32:39	5.86583	0	5.26	30	0	-0.0109189	0	0	636211	-0.16	20.5
04-05-2021 23:33:39	5.8825	0	5.26	30	0	-0.0109189	0	0	636211	-0.16	20.5
04-05-2021 23:34:39	5.89917	0	5.26	30	0	-0.0109189	0	0	636211	-0.16	20.5
04-05-2021 23:35:39	5.91583	0	5.26	30	0	-0.0109189	0	0	636211	-0.16	20.5
04-05-2021 23:36:39	5.9325	0	5.26	30	0	-0.0109189	0	0	636211	-0.16	20.5
04-05-2021 23:37:39	5.94917	0	5.26	30	0	-0.0109189	0	0	636211	-0.16	20.5
04-05-2021 23:38:39	5.96583	0	5.26	30	0	-0.0109189	0	0	636211	-0.16	20.5
04-05-2021 23:39:39	5.9825	0	5.26	30	0	-0.0109189	0	0	636211	-0.16	20.5
04-05-2021 23:40:39	5.99917	0	5.26	30	0	-0.0109189	0	0	636211	-0.16	20.5
04-05-2021 23:41:39	6.01583	0	5.26	30	0	-0.0109189	0	0	636211	-0.16	20.5
04-05-2021 23:42:39	6.0325	0	5.26	30	0	-0.0109189	0	0	636211	-0.16	20.5
04-05-2021 23:43:39	6.04917	0	5.26	30	0	-0.0109189	0	0	636211	-0.16	20.5
04-05-2021 23:44:39	6.06583	0	5.26	30	0	-0.0109189	0	0	636211	-0.16	20.5
04-05-2021 23:45:39	6.0825	0	5.26	30	0	-0.0109189	0	0	636211	-0.16	20.5
04-05-2021 23:46:39	6.09917	0	5.26	30	0	-0.0109189	0	0	636211	-0.16	20.5
04-05-2021 23:47:39	6.11583	0	5.26	30	0	-0.0109189	0	0	636211	-0.16	20.5
04-05-2021 23:48:39	6.1325	0	5.26	30	0	-0.0109189	0	0	636211	-0.16	20.5
04-05-2021 23:49:39	6.14917	0	5.26	30	0	-0.0109189	0	0	636211	-0.16	20.5
04-05-2021 23:50:39	6.16583	0	5.26	30	0	-0.0109189	0	0	636211	-0.16	20.5
04-05-2021 23:51:39	6.1825	0	5.26	30	0	-0.0109189	0	0	636211	-0.16	20.5
04-05-2021 23:52:39	6.19917	0	5.25	30	0	-0.0109189	0	0	636211	-0.16	20.5
04-05-2021 23:53:39	6.21583	0	5.25	30	0	-0.0109189	0	0	636211	-0.16	20.5
04-05-2021 23:54:39	6.2325	0	5.25	30	0	-0.0109189	0	0	636211	-0.16	20.5
04-05-2021 23:55:39	6.24917	0	5.25	30	0	-0.0109189	0	0	636211	-0.16	20.5
04-05-2021 23:56:39	6.26583	0	5.25	30	0	-0.0109189	0	0	636211	-0.16	20.5
04-05-2021 23:57:39	6.2825	0	5.25	30	0	-0.0109189	0	0	636211	-0.16	20.5
04-05-2021 23:58:39	6.29917	0	5.25	30	0	-0.0109189	0	0	636211	-0.16	20.5
04-05-2021 23:59:39	6.31583	0	5.25	30	0	-0.0109189	0	0	636211	-0.16	20.5
05-05-2021 00:00:39	6.3325	0	5.25	30	0	-0.0109189	0	0	636211	-0.16	20.5
05-05-2021 00:01:39	6.34917	0	5.25	30	0	-0.0109189	0	0	636211	-0.16	20.5
05-05-2021 00:02:39	6.36583	0	5.25	30	0	-0.0109189	0	0	636211	-0.16	20.5
05-05-2021 00:03:39	6.3825	0	5.25	30	0	-0.0109189	0	0	636211	-0.16	20.5
05-05-2021 00:04:39	6.39917	0	5.25	30	0	-0.0109189	0	0	636211	-0.16	20.5
05-05-2021 00:05:39	6.41583	0	5.25	30	0	-0.0109189	0	0	636211	-0.16	20.5
05-05-2021 00:06:39	6.4325	0	5.25	30	0	-0.0109189	0	0	636211	-0.16	20.5
05-05-2021 00:07:39	6.44917	0	5.25	30	0	-0.0109189	0	0	636211	-0.16	20.5
05-05-2021 00:08:39	6.46583	0	5.25	30	0	-0.0109189	0	0	636211	-0.16	20.5
05-05-2021 00:09:39	6.4825	0	5.25	30	0	-0.0109189	0	0	636211	-0.16	20.5
05-05-2021 00:10:39	6.49917	0	5.25	30	0	-0.0109189	0	0	636211	-0.16	20.5
05-05-2021 00:11:39	6.51583	0	5.25	30	0	-0.0109189	0	0	636211	-0.16	20.5
05-05-2021 00:12:39	6.5325	0	5.25	30	0	-0.0109189	0	0	636211	-0.16	20.5
05-05-2021 00:13:39	6.54917	0	5.24	30	0	-0.0109189	0	0	636211	-0.16	20.5
05-05-2021 00:14:39	6.56583	0	5.24	30	0	-0.0109189	0	0	636211	-0.16	20.5
05-05-2021 00:15:39	6.5825	0	5.24	30	0	-0.0109189	0	0	636211	-0.16	20.5
05-05-2021 00:16:39	6.59917	0	5.24	30	0	-0.0109189	0	0	636211	-0.16	20.5
05-05-2021 00:17:39	6.61583	0	5.24	30	0	-0.0109189	0	0	636211	-0.16	20.5
05-05-2021 00:18:39	6.6325	0	5.24	30	0	-0.0109189	0	0	636211	-0.16	20.5
05-05-2021 00:19:39	6.64917	0	5.24	30	0	-0.0109189	0	0	636211	-0.16	20.5
05-05-2021 00:20:39	6.66583	0	5.24	30	0	-0.0109189	0	0	636211	-0.16	20.5
05-05-2021 00:21:39	6.6825	0	5.24	30	0	-0.0109189	0	0	636211	-0.16	20.5
05-05-2021 00:22:39	6.69917	0	5.24	30	0	-0.0109189	0	0	636211	-0.16	20.5
05-05-2021 00:23:39	6.71583	0	5.26	30	0	-0.0109189	0	0	636211	-0.16	20.5
05-05-2021 00:24:39	6.7325	0	5.26	30	0	-0.0109189	0	0	636211	-0.16	20.5
05-05-2021 00:25:39	6.74917	0	5.26	30	0	-0.0109189	0	0	636211	-0.16	20.5
05-05-2021 00:26:39	6.76583	0	5.26	30	0	-0.0109189	0	0	636211	-0.16	20.5
05-05-2021 00:27:39	6.7825	0	5.26	30	0	-0.0109189	0	0	636211	-0.16	20.5
05-05-2021 00:28:39	6.79917	0	5.26	30	0	-0.0109189	0	0	636211	-0.16	20.5
05-05-2021 00:29:39	6.81583	0	5.26	30	0	-0.0109189	0	0	636211	-0.16	20.5
05-05-2021 00:30:39	6.8325	0	5.26	30	0	-0.0109189	0	0	636211	-0.16	20.5
05-05-2021 00:31:39	6.84917	0	5.26	30	0	-0.0109189	0	0	636211	-0.16	20.5
05-05-2021 00:32:39	6.86583	0	5.26	30	0	-0.0109189	0	0	636211	-0.16	20.5
05-05-2021 00:33:39	6.8825	0	5.26	30	0	-0.0109189	0	0	636211	-0.16	20.5
05-05-2021 00:34:39	6.89917	0	5.26	30	0	-0.0109189	0	0	636211	-0.16	20.5
05-05-2021 00:35:39	6.91583	0	5.26	30	0	-0.0109189	0	0	636211	-0.16	20.5
05-05-2021 00:36:39	6.9325	0	5.26	30	0	-0.0109189	0	0	636211	-0.16	20.5
05-05-2021 00:37:39	6.94917	0	5.26	30	0	-0.0109189	0	0	636211	-0.16	20.5
05-05-2021 00:38:39	6.96583	0	5.26	30	0	-0.0109189	0	0	636211	-0.16	20.5
05-05-2021 00:39:39	6.9825	0	5.26	30	0	-0.0109189	0	0	636211	-0.16	20.5
05-05-2021 00:40:39	6.99917	0	5.25	30	0	-0.0109189	0	0	636211	-0.16	20.5
05-05-2021 00:41:39	7.01583	0	5.25	30	0	-0.0109189	0	0	636211	-0.16	20.5
05-05-2021 00:42:39	7.0325	0	5.25	30	0	-0.0109189	0	0	636211	-0.16	20.5
05-05-2021 00:43:39	7.04917	0	5.25	30	0	-0.0109189	0	0	636211	-0.16	20.5
05-05-2021 00:44:39	7.06583	0	5.25	30	0	-0.0109189	0	0	636211	-0.16	20.5
05-05-2021 00:45:39	7.0825	0	5.25	30	0	-0.0109189	0	0	636211	-0.16	20.5
05-05-2021 00:46:39	7.09917	0	5.25	30	0	-0.0109189	0	0	636211	-0.16	20.5
05-05-2021 00:47:39	7.11583	0	5.25	30	0	-0.0109189	0	0	636211	-0.16	20.5
05-05-2021 00:48:39	7.1325	0	5.25	30	0	-0.0109189	0	0	636211	-0.16	20.5
05-05-2021 00:49:39	7.14917	0	5.25	30	0	-0.0109189	0	0	636211	-0.16	20.5
05-05-2021 00:50:39	7.16583	0	5.25	30	0	-0.0109189	0	0	636211	-0.16	20.5
05-05-2021 00:51:39	7.1825	0	5.25	30	0	-0.0109189	0	0	636211	-0.16	20.5
05-05-2021 00:52:39	7.19917	0	5.25	30	0	-0.0109189	0	0	636211	-0.16	20.5
05-05-2021 00:53:39	7.21583	0	5.25	30	0	-0.0109189	0	0	636211	-0.16	20.5
05-05-2021 00:54:39	7.2325	0	5.25	30	0	-0.0109189	0	0	636211	-0.16	20.5
05-05-2021 00:55:39	7.24917	0	5.25	30	0	-0.0109189	0	0	636211	-0.16	20.5
05-05-2021 00:56:39	7.26583	0	5.25	30	0	-0.0109189	0	0	636211	-0.16	20.5
05-05-2021 00:57:39	7.2825	0	5.24	30	0	-0.0109189	0	0	636211	-0.16	20.5
05-05-2021 00:58:39	7.29917	0	5.24	30	0	-0.0109189	0	0	636211	-0.16	20.5
05-05-2021 00:59:39	7.31583	0	5.24	30	0	-0.0109189	0	0	636211	-0.16	20.5
05-05-2021 01:00:39	7.3325	0	5.24	30	0	-0.0109189	0	0	636211	-0.16	20.5
05-05-2021 01:01:39	7.34917	0	5.24	30	0	-0.0109189	0	0	636211	-0.16	20.5
05-05-2021 01:02:39	7.36583	0	5.24	30	0	-0.0109189	0	0	636211	-0.16	20.5
05-05-2021 01:03:39	7.3825	0	5.24	30	0	-0.0109189	0	0	636211	-0.16	20.5
05-05-2021 01:04:39	7.39917	0	5.24	30	0	-0.0109189	0	0	636211	-0.16	20.5
05-05-2021 01:05:39	7.41583	0	5.24	30	0	-0.0109189	0	0	636211	-0.16	20.5
05-05-2021 01:06:39	7.4325	0	5.24	30	0	-0.0109189	0	0	636211	-0.16	20.5
05-05-2021 01:07:39	7.44917	0	5.24	30	0	-0.0109189	0	0	636211	-0.16	20.5
05-05-2021 01:08:39	7.46583	0	5.24	30	0	-0.0109189	0	0	636211	-0.16	20.5
05-05-2021 01:09:39	7.4825	0	5.24	30	0	-0.0109189	0	0	636211	-0.16	20.5
05-05-2021 01:10:39	7.49917	0	5.24	30	0	-0.0109189	0	0	636211	-0.16	20.5
05-05-2021 01:11:39	7.51583	0	5.24	30	0	-0.0109189	0	0	636211	-0.16	20.5
05-05-2021 01:12:39	7.5325	0	5.24	30	0	-0.0109189	0	0	636211	-0.16	20.5
05-05-2021 01:13:39	7.54917	0	5.23	30	0	-0.0109189	0	0	636211	-0.16	20.5
05-05-2021 01:14:39	7.56583	0	5.23	30	0	-0.0109189	0	0	636211	-0.16	20.5
05-05-2021 01:15:39	7.5825	0	5.23	30	0	-0.0109189	0	0	636211	-0.16	20.5
05-05-2021 01:16:39	7.59917	0	5.23	30	0	-0.0109189	0	0	636211	-0.16	20.5
05-05-2021 01:17:39	7.61583	0	5.23	30	0	-0.0109189	0	0	636211	-0.16	20.5
05-05-2021 01:18:39	7.6325	0	5.23	30	0	-0.0109189	0	0	636211	-0.16	20.5
05-05-2021 01:19:39	7.64917	0	5.23	30	0	-0.0109189	0	0	636211	-0.16	20.5
05-05-2021 01:20:39	7.66583	0	5.23	30	0	-0.0109189	0	0	636211	-0.16	20.5
05-05-2021 01:21:39	7.6825	0	5.23	30	0	-0.0109189	0	0	636211	-0.16	20.5
05-05-2021 01:22:39	7.69917	0	5.23	30	0	-0.0109189	0	0	636211	-0.16	20.5
05-05-2021 01:23:39	7.71583	0	5.23	30	0	-0.0109189	0	0	636211	-0.16	20.5
05-05-2021 01:24:39	7.7325	0	5.23	30	0	-0.0109189	0	0	636211	-0.16	20.5
05-05-2021 01:25:39	7.74917	0	5.23	30	0	-0.0109189	0	0	636211	-0.16	20.5
05-05-2021 01:26:39	7.76583	0	5.23	30	0	-0.0109189	0	0	636211	-0.16	20.5
05-05-2021 01:27:39	7.7825	0	5.23	30	0	-0.0109189	0	0	636211	-0.16	20.5
05-05-2021 01:28:39	7.79917	0	5.22	30	0	-0.0109189	0	0	636211	-0.16	20.5
05-05-2021 01:29:39	7.81583	0	5.22	30	0	-0.0109189	0	0	636211	-0.16	20.5
05-05-2021 01:30:39	7.8325	0	5.22	30	0	-0.0109189	0	0	636211	-0.16	20.5
05-05-2021 01:31:39	7.84917	0	5.22	30	0	-0.0109189	0	0	636211	-0.16	20.5
05-05-2021 01:32:39	7.86583	0	5.22	30	0	-0.0109189	0	0	636211	-0.16	20.5
05-05-2021 01:33:39	7.8825	0	5.22	30	0	-0.0109189	0	0	636211	-0.16	20.5
05-05-2021 01:34:39	7.89917	0	5.22	30	0	-0.0109189	0	0	636211	-0.16	20.5
05-05-2021 01:35:39	7.91583	0	5.22	30	0	-0.0109189	0	0	636211	-0.16	20.5
05-05-2021 01:36:39	7.9325	0	5.22	30	0	-0.0109189	0	0	636211	-0.16	20.5
05-05-2021 01:37:39	7.94917	0	5.22	30	0	-0.0109189	0	0	636211	-0.16	20.5
05-05-2021 01:38:39	7.96583	0	5.22	30	0	-0.0109189	0	0	636211	-0.16	20.5
05-05-2021 01:39:39	7.9825	0	5.22	30	0	-0.0109189	0	0	636211	-0.16	20.5
05-05-2021 01:40:39	7.99917	0	5.22	30	0	-0.0109189	0	0	636211	-0.16	20.5
05-05-2021 01:41:39	8.01583	0	5.22	30	0	-0.0109189	0	0	636211	-0.16	20.5
05-05-2021 01:42:39	8.0325	0	5.22	30	0	-0.0109189	0	0	636211	-0.16	20.5
05-05-2021 01:43:39	8.04917	0	5.22	30	0	-0.0109189	0	0	636211	-0.16	20.5
05-05-2021 01:44:39	8.06583	0	5.21	30	0	-0.0109189	0	0	636211	-0.16	20.5
05-05-2021 01:45:39	8.0825	0	5.21	30	0	-0.0109189	0	0	636211	-0.16	20.5
05-05-2021 01:46:39	8.09917	0	5.21	30	0	-0.0109189	0	0	636211	-0.16	20.5
05-05-2021 01:47:39	8.11583	0	5.21	30	0	-0.0109189	0	0	636211	-0.16	20.5
05-05-2021 01:48:39	8.1325	0	5.21	30	0	-0.0109189	0	0	636211	-0.16	20.5
05-05-2021 01:49:39	8.14917	0	5.21	30	0	-0.0109189	0	0	636211	-0.16	20.5
05-05-2021 01:50:39	8.16583	0	5.21	30	0	-0.0109189	0	0	636211	-0.16	20.5
05-05-2021 01:51:39	8.1825	0	5.21	30	0	-0.0109189	0	0	636211	-0.16	20.5
05-05-2021 01:52:39	8.19917	0	5.21	30	0	-0.0109189	0	0	636211	-0.16	20.5
05-05-2021 01:53:39	8.21583	0	5.21	30	0	-0.0109189	0	0	636211	-0.16	20.5
05-05-2021 01:54:39	8.2325	0	5.21	30	0	-0.0109189	0	0	636211	-0.16	20.5
05-05-2021 01:55:39	8.24917	0	5.21	30	0	-0.0109189	0	0	636211	-0.16	20.5
05-05-2021 01:56:39	8.26583	0	5.21	30	0	-0.0109189	0	0	636211	-0.16	20.5
05-05-2021 01:57:39	8.2825	0	5.21	30	0	-0.0109189	0	0	636211	-0.16	20.5
05-05-2021 01:58:39	8.29917	0	5.2	30	0	-0.0109189	0	0	636211	-0.16	20.5
05-05-2021 01:59:39	8.31583	0	5.2	30	0	-0.0109189	0	0	636211	-0.16	20.5
05-05-2021 02:00:39	8.3325	0	5.2	30	0	-0.0109189	0	0	636211	-0.16	20.5
05-05-2021 02:01:39	8.34917	0	5.2	30	0	-0.0109189	0	0	636211	-0.16	20.5
05-05-2021 02:02:39	8.36583	0	5.2	30	0	-0.0109189	0	0	636211	-0.16	20.5
05-05-2021 02:03:39	8.3825	0	5.2	30	0	-0.0109189	0	0	636211	-0.16	20.5
05-05-2021 02:04:39	8.39917	0	5.2	30	0	-0.0109189	0	0	636211	-0.16	20.5
05-05-2021 02:05:39	8.41583	0	5.2	30	0	-0.0109189	0	0	636211	-0.16	20.5
05-05-2021 02:06:39	8.4325	0	5.2	30	0	-0.0109189	0	0	636211	-0.16	20.5
05-05-2021 02:07:39	8.44917	0	5.2	30	0	-0.0109189	0	0	636211	-0.16	20.5
05-05-2021 02:08:39	8.46583	0	5.2	30	0	-0.0109189	0	0	636211	-0.16	20.5
05-05-2021 02:09:39	8.4825	0	5.2	30	0	-0.0109189	0	0	636211	-0.16	20.5
05-05-2021 02:10:39	8.49917	0	5.2	30	0	-0.0109189	0	0	636211	-0.16	20.5
05-05-2021 02:11:39	8.51583	0	5.19	30	0	-0.0109189	0	0	636211	-0.16	20.5
05-05-2021 02:12:39	8.5325	0	5.19	30	0	-0.0109189	0	0	636211	-0.16	20.5
05-05-2021 02:13:39	8.54917	0	5.19	30	0	-0.0109189	0	0	636211	-0.16	20.5
05-05-2021 02:14:39	8.56583	0	5.19	30	0	-0.0109189	0	0	636211	-0.16	20.5
05-05-2021 02:15:39	8.5825	0	5.19	30	0	-0.0109189	0	0	636211	-0.16	20.5
05-05-2021 02:16:39	8.59917	0	5.19	30	0	-0.0109189	0	0	636211	-0.16	20.5
05-05-2021 02:17:39	8.61583	0	5.19	30	0	-0.0109189	0	0	636211	-0.16	20.5
05-05-2021 02:18:39	8.6325	0	5.19	30	0	-0.0109189	0	0	636211	-0.16	20.5
05-05-2021 02:19:39	8.64917	0	5.19	30	0	-0.0109189	0	0	636211	-0.16	20.5
05-05-2021 02:20:39	8.66583	0	5.19	30	0	-0.0109189	0	0	636211	-0.16	20.5
05-05-2021 02:21:39	8.6825	0	5.19	30	0	-0.0109189	0	0	636211	-0.16	20.5
05-05-2021 02:22:39	8.69917	0	5.21	30	0	-0.0109189	0	0	636211	-0.16	20.5
05-05-2021 02:23:39	8.71583	0	5.21	30	0	-0.0109189	0	0	636211	-0.16	20.5
05-05-2021 02:24:39	8.7325	0	5.21	30	0	-0.0109189	0	0	636211	-0.16	20.5
05-05-2021 02:25:39	8.74917	0	5.21	30	0	-0.0109189	0	0	636211	-0.16	20.5
05-05-2021 02:26:39	8.76583	0	5.21	30	0	-0.0109189	0	0	636211	-0.16	20.5
05-05-2021 02:27:39	8.7825	0	5.21	30	0	-0.0109189	0	0	636211	-0.16	20.5
05-05-2021 02:28:39	8.79917	0	5.21	30	0	-0.0109189	0	0	636211	-0.16	20.5
05-05-2021 02:29:39	8.81583	0	5.21	30	0	-0.0109189	0	0	636211	-0.16	20.5
05-05-2021 02:30:39	8.8325	0	5.21	30	0	-0.0109189	0	0	636211	-0.16	20.5
05-05-2021 02:31:39	8.84917	0	5.21	30	0	-0.0109189	0	0	636211	-0.16	20.5
05-05-2021 02:32:39	8.86583	0	5.2	30	0	-0.0109189	0	0	636211	-0.16	20.5
05-05-2021 02:33:39	8.8825	0	5.2	30	0	-0.0109189	0	0	636211	-0.16	20.5
05-05-2021 02:34:39	8.89917	0	5.2	30	0	-0.0109189	0	0	636211	-0.16	20.5
05-05-2021 02:35:39	8.91583	0	5.2	30	0	-0.0109189	0	0	636211	-0.16	20.5
05-05-2021 02:36:39	8.9325	0	5.2	30	0	-0.0109189	0	0	636211	-0.16	20.5
05-05-2021 02:37:39	8.94917	0	5.2	30	0	-0.0109189	0	0	636211	-0.16	20.5
05-05-2021 02:38:39	8.96583	0	5.2	30	0	-0.0109189	0	0	636211	-0.16	20.5
05-05-2021 02:39:39	8.9825	0	5.2	30	0	-0.0109189	0	0	636211	-0.16	20.5
05-05-2021 02:40:39	8.99917	0	5.2	30	0	-0.0109189	0	0	636211	-0.16	20.5
05-05-2021 02:41:39	9.01583	0	5.2	30	0	-0.0109189	0	0	636211	-0.16	20.5
05-05-2021 02:42:39	9.0325	0	5.2	30	0	-0.0109189	0	0	636211	-0.16	20.5
05-05-2021 02:43:39	9.04917	0	5.2	30	0	-0.0109189	0	0	636211	-0.16	20.5
05-05-2021 02:44:39	9.06583	0	5.2	30	0	-0.0109189	0	0	636211	-0.16	20.5
05-05-2021 02:45:39	9.0825	0	5.19	30	0	-0.0109189	0	0	636211	-0.16	20.5
05-05-2021 02:46:39	9.09917	0	5.19	30	0	-0.0109189	0	0	636211	-0.16	20.5
05-05-2021 02:47:39	9.11583	0	5.19	30	0	-0.0109189	0	0	636211	-0.16	20.5
05-05-2021 02:48:39	9.1325	0	5.19	30	0	-0.0109189	0	0	636211	-0.16	20.5
05-05-2021 02:49:39	9.14917	0	5.19	30	0	-0.0109189	0	0	636211	-0.16	20.5
05-05-2021 02:50:39	9.16583	0	5.19	30	0	-0.0109189	0	0	636211	-0.16	20.5
05-05-2021 02:51:39	9.1825	0	5.19	30	0	-0.0109189	0	0	636211	-0.16	20.5
05-05-2021 02:52:39	9.19917	0	5.19	30	0	-0.0109189	0	0	636211	-0.16	20.5
05-05-2021 02:53:39	9.21583	0	5.19	30	0	-0.0109189	0	0	636211	-0.16	20.5
05-05-2021 02:54:39	9.2325	0	5.19	30	0	-0.0109189	0	0	636211	-0.16	20.5
05-05-2021 02:55:39	9.24917	0	5.19	30	0	-0.0109189	0	0	636211	-0.16	20.5
05-05-2021 02:56:39	9.26583	0	5.18	30	0	-0.0109189	0	0	636211	-0.16	20.5
05-05-2021 02:57:39	9.2825	0	5.18	30	0	-0.0109189	0	0	636211	-0.16	20.5
05-05-2021 02:58:39	9.29917	0	5.18	30	0	-0.0109189	0	0	636211	-0.16	20.5
05-05-2021 02:59:39	9.31583	0	5.18	30	0	-0.0109189	0	0	636211	-0.16	20.5
05-05-2021 03:00:39	9.3325	0	5.18	30	0	-0.0109189	0	0	636211	-0.16	20.5
05-05-2021 03:01:39	9.34917	0	5.18	30	0	-0.0109189	0	0	636211	-0.16	20.5
05-05-2021 03:02:39	9.36583	0	5.18	30	0	-0.0109189	0	0	636211	-0.16	20.5
05-05-2021 03:03:39	9.3825	0	5.18	30	0	-0.0109189	0	0	636211	-0.16	20.5
05-05-2021 03:04:39	9.39917	0	5.18	30	0	-0.0109189	0	0	636211	-0.16	20.5
05-05-2021 03:05:39	9.41583	0	5.18	30	0	-0.0109189	0	0	636211	-0.16	20.5
05-05-2021 03:06:39	9.4325	0	5.18	30	0	-0.0109189	0	0	636211	-0.16	20.5
05-05-2021 03:07:39	9.44917	0	5.17	30	0	-0.0109189	0	0	636211	-0.16	20.5
05-05-2021 03:08:39	9.46583	0	5.17	30	0	-0.0109189	0	0	636211	-0.16	20.5
05-05-2021 03:09:39	9.4825	0	5.17	30	0	-0.0109189	0	0	636211	-0.16	20.5
05-05-2021 03:10:39	9.49917	0	5.17	30	0	-0.0109189	0	0	636211	-0.16	20.5
05-05-2021 03:11:39	9.51583	0	5.17	30	0	-0.0109189	0	0	636211	-0.16	20.5
05-05-2021 03:12:39	9.5325	0	5.17	30	0	-0.0109189	0	0	636211	-0.16	20.5
05-05-2021 03:13:39	9.54917	0	5.17	30	0	-0.0109189	0	0	636211	-0.16	20.5
05-05-2021 03:14:39	9.56583	0	5.17	30	0	-0.0109189	0	0	636211	-0.16	20.5
05-05-2021 03:15:39	9.5825	0	5.17	30	0	-0.0109189	0	0	636211	-0.16	20.5
05-05-2021 03:16:39	9.59917	0	5.17	30	0	-0.0109189	0	0	636211	-0.16	20.5
05-05-2021 03:17:39	9.61583	0	5.17	30	0	-0.0109189	0	0	636211	-0.16	20.5
05-05-2021 03:18:39	9.6325	0	5.16	30	0	-0.0109189	0	0	636211	-0.16	20.5
05-05-2021 03:19:39	9.64917	0	5.16	30	0	-0.0109189	0	0	636211	-0.16	20.5
05-05-2021 03:20:39	9.66583	0	5.16	30	0	-0.0109189	0	0	636211	-0.16	20.5
05-05-2021 03:21:39	9.6825	0	5.16	30	0	-0.0109189	0	0	636211	-0.16	20.5
05-05-2021 03:22:39	9.69917	0	5.16	30	0	-0.0109189	0	0	636211	-0.16	20.5
05-05-2021 03:23:39	9.71583	0	5.16	30	0	-0.0109189	0	0	636211	-0.16	20.5
05-05-2021 03:24:39	9.7325	0	5.16	30	0	-0.0109189	0	0	636211	-0.16	20.5
05-05-2021 03:25:39	9.74917	0	5.16	30	0	-0.0109189	0	0	636211	-0.16	20.5
05-05-2021 03:26:39	9.76583	0	5.16	30	0	-0.0109189	0	0	636211	-0.16	20.5
05-05-2021 03:27:39	9.7825	0	5.16	30	0	-0.0109189	0	0	636211	-0.16	20.5
05-05-2021 03:28:39	9.79917	0	5.15	30	0	-0.0109189	0	0	636211	-0.16	20.5
05-05-2021 03:29:39	9.81583	0	5.15	30	0	-0.0109189	0	0	636211	-0.16	20.5
05-05-2021 03:30:39	9.8325	0	5.15	30	0	-0.0109189	0	0	636211	-0.16	20.5
05-05-2021 03:31:39	9.84917	0	5.15	30	0	-0.0109189	0	0	636211	-0.16	20.5
05-05-2021 03:32:39	9.86583	0	5.15	30	0	-0.0109189	0	0	636211	-0.16	20.5
05-05-2021 03:33:39	9.8825	0	5.15	30	0	-0.0109189	0	0	636211	-0.16	20.5
05-05-2021 03:34:39	9.89917	0	5.15	30	0	-0.0109189	0	0	636211	-0.16	20.5
05-05-2021 03:35:39	9.91583	0	5.15	30	0	-0.0109189	0	0	636211	-0.16	20.5
05-05-2021 03:36:39	9.9325	0	5.15	30	0	-0.0109189	0	0	636211	-0.16	20.5
05-05-2021 03:37:39	9.94917	0	5.15	30	0	-0.0109189	0	0	636211	-0.16	20.5
05-05-2021 03:38:39	9.96583	0	5.14	30	0	-0.0109189	0	0	636211	-0.16	20.5
05-05-2021 03:39:39	9.9825	0	5.14	30	0	-0.0109189	0	0	636211	-0.16	20.5
05-05-2021 03:40:39	9.99917	0	5.14	30	0	-0.0109189	0	0	636211	-0.16	20.5
05-05-2021 03:41:39	10.0158	0	5.14	30	0	-0.0109189	0	0	636211	-0.16	20.5
05-05-2021 03:42:39	10.0325	0	5.14	30	0	-0.0109189	0	0	636211	-0.16	20.5
05-05-2021 03:43:39	10.0492	0	5.14	30	0	-0.0109189	0	0	636211	-0.16	20.5
05-05-2021 03:44:39	10.0658	0	5.14	30	0	-0.0109189	0	0	636211	-0.16	20.5
05-05-2021 03:45:39	10.0825	0	5.14	30	0	-0.0109189	0	0	636211	-0.16	20.5
05-05-2021 03:46:39	10.0992	0	5.14	30	0	-0.0109189	0	0	636211	-0.16	20.5
05-05-2021 03:47:39	10.1158	0	5.13	30	0	-0.0109189	0	0	636211	-0.16	20.5
05-05-2021 03:48:39	10.1325	0	5.13	30	0	-0.0109189	0	0	636211	-0.16	20.5
05-05-2021 03:49:39	10.1492	0	5.13	30	0	-0.0109189	0	0	636211	-0.16	20.5
05-05-2021 03:50:39	10.1658	0	5.13	30	0	-0.0109189	0	0	636211	-0.16	20.5
05-05-2021 03:51:39	10.1825	0	5.13	30	0	-0.0109189	0	0	636211	-0.16	20.5
05-05-2021 03:52:39	10.1992	0	5.13	30	0	-0.0109189	0	0	636211	-0.16	20.5
05-05-2021 03:53:39	10.2158	0	5.13	30	0	-0.0109189	0	0	636211	-0.16	20.5
05-05-2021 03:54:39	10.2325	0	5.13	30	0	-0.0109189	0	0	636211	-0.16	20.5
05-05-2021 03:55:39	10.2492	0	5.13	30	0	-0.0109189	0	0	636211	-0.16	20.5
05-05-2021 03:56:39	10.2658	0	5.12	30	0	-0.0109189	0	0	636211	-0.16	20.5
05-05-2021 03:57:39	10.2825	0	5.12	30	0	-0.0109189	0	0	636211	-0.16	20.5
05-05-2021 03:58:39	10.2992	0	5.12	30	0	-0.0109189	0	0	636211	-0.16	20.5
05-05-2021 03:59:39	10.3158	0	5.12	30	0	-0.0109189	0	0	636211	-0.16	20.5
05-05-2021 04:00:39	10.3325	0	5.12	30	0	-0.0109189	0	0	636211	-0.16	20.5
05-05-2021 04:01:39	10.3492	0	5.12	30	0	-0.0109189	0	0	636211	-0.16	20.5
05-05-2021 04:02:39	10.3658	0	5.12	30	0	-0.0109189	0	0	636211	-0.16	20.5
05-05-2021 04:03:39	10.3825	0	5.12	30	0	-0.0109189	0	0	636211	-0.16	20.5
05-05-2021 04:04:39	10.3992	0	5.11	30	0	-0.0109189	0	0	636211	-0.16	20.5
05-05-2021 04:05:39	10.4158	0	5.11	30	0	-0.0109189	0	0	636211	-0.16	20.5
05-05-2021 04:06:39	10.4325	0	5.11	30	0	-0.0109189	0	0	636211	-0.16	20.5
05-05-2021 04:07:39	10.4492	0	5.11	30	0	-0.0109189	0	0	636211	-0.16	20.5
05-05-2021 04:08:39	10.4658	0	5.11	30	0	-0.0109189	0	0	636211	-0.16	20.5
05-05-2021 04:09:39	10.4825	0	5.11	30	0	-0.0109189	0	0	636211	-0.16	20.5
05-05-2021 04:10:39	10.4992	0	5.11	30	0	-0.0109189	0	0	636211	-0.16	20.5
05-05-2021 04:11:39	10.5158	0	5.11	30	0	-0.0109189	0	0	636211	-0.16	20.5
05-05-2021 04:12:39	10.5325	0	5.1	30	0	-0.0109189	0	0	636211	-0.16	20.5
05-05-2021 04:13:39	10.5492	0	5.1	30	0	-0.0109189	0	0	636211	-0.16	20.5
05-05-2021 04:14:39	10.5658	0	5.1	30	0	-0.0109189	0	0	636211	-0.16	20.5
05-05-2021 04:15:39	10.5825	0	5.1	30	0	-0.0109189	0	0	636211	-0.16	20.5
05-05-2021 04:16:39	10.5992	0	5.1	30	0	-0.0109189	0	0	636211	-0.16	20.5
05-05-2021 04:17:39	10.6158	0	5.1	30	0	-0.0109189	0	0	636211	-0.16	20.5
05-05-2021 04:18:39	10.6325	0	5.1	30	0	-0.0109189	0	0	636211	-0.16	20.5
05-05-2021 04:19:39	10.6492	0	5.1	30	0	-0.0109189	0	0	636211	-0.16	20.5
05-05-2021 04:20:39	10.6658	0	5.12	30	0	-0.0109189	0	0	636211	-0.16	20.5
05-05-2021 04:21:39	10.6825	0	5.12	30	0	-0.0109189	0	0	636211	-0.16	20.5
05-05-2021 04:22:39	10.6992	0	5.12	30	0	-0.0109189	0	0	636211	-0.16	20.5
05-05-2021 04:23:39	10.7158	0	5.12	30	0	-0.0109189	0	0	636211	-0.16	20.5
05-05-2021 04:24:39	10.7325	0	5.12	30	0	-0.0109189	0	0	636211	-0.16	20.5
05-05-2021 04:25:39	10.7492	0	5.12	30	0	-0.0109189	0	0	636211	-0.16	20.5
05-05-2021 04:26:39	10.7658	0	5.12	30	0	-0.0109189	0	0	636211	-0.16	20.5
05-05-2021 04:27:39	10.7825	0	5.11	30	0	-0.0109189	0	0	636211	-0.16	20.5
05-05-2021 04:28:39	10.7992	0	5.11	30	0	-0.0109189	0	0	636211	-0.16	20.5
05-05-2021 04:29:39	10.8158	0	5.11	30	0	-0.0109189	0	0	636211	-0.16	20.5
05-05-2021 04:30:39	10.8325	0	5.11	30	0	-0.0109189	0	0	636211	-0.16	20.5
05-05-2021 04:31:39	10.8492	0	5.11	30	0	-0.0109189	0	0	636211	-0.16	20.5
05-05-2021 04:32:39	10.8658	0	5.11	30	0	-0.0109189	0	0	636211	-0.16	20.5
05-05-2021 04:33:39	10.8825	0	5.11	30	0	-0.0109189	0	0	636211	-0.16	20.5
05-05-2021 04:34:39	10.8992	0	5.11	30	0	-0.0109189	0	0	636211	-0.16	20.5
05-05-2021 04:35:39	10.9158	0	5.1	30	0	-0.0109189	0	0	636211	-0.16	20.5
05-05-2021 04:36:39	10.9325	0	5.1	30	0	-0.0109189	0	0	636211	-0.16	20.5
05-05-2021 04:37:39	10.9492	0	5.1	30	0	-0.0109189	0	0	636211	-0.16	20.5
05-05-2021 04:38:39	10.9658	0	5.1	30	0	-0.0109189	0	0	636211	-0.16	20.5
05-05-2021 04:39:39	10.9825	0	5.1	30	0	-0.0109189	0	0	636211	-0.16	20.5
05-05-2021 04:40:39	10.9992	0	5.1	30	0	-0.0109189	0	0	636211	-0.16	20.5
05-05-2021 04:41:39	11.0158	0	5.1	30	0	-0.0109189	0	0	636211	-0.16	20.5
05-05-2021 04:42:39	11.0325	0	5.1	30	0	-0.0109189	0	0	636211	-0.16	20.5
05-05-2021 04:43:39	11.0492	0	5.09	30	0	-0.0109189	0	0	636211	-0.16	20.5
05-05-2021 04:44:39	11.0658	0	5.09	30	0	-0.0109189	0	0	636211	-0.16	20.5
05-05-2021 04:45:39	11.0825	0	5.09	30	0	-0.0109189	0	0	636211	-0.16	20.5
05-05-2021 04:46:39	11.0992	0	5.09	30	0	-0.0109189	0	0	636211	-0.16	20.5
05-05-2021 04:47:39	11.1158	0	5.09	30	0	-0.0109189	0	0	636211	-0.16	20.5
05-05-2021 04:48:39	11.1325	0	5.09	30	0	-0.0109189	0	0	636211	-0.16	20.5
05-05-2021 04:49:39	11.1492	0	5.09	30	0	-0.0109189	0	0	636211	-0.16	20.5
05-05-2021 04:50:39	11.1658	0	5.09	30	0	-0.0109189	0	0	636211	-0.16	20.5
05-05-2021 04:51:39	11.1825	0	5.08	30	0	-0.0109189	0	0	636211	-0.16	20.5
05-05-2021 04:52:39	11.1992	0	5.08	30	0	-0.0109189	0	0	636211	-0.16	20.5
05-05-2021 04:53:39	11.2158	0	5.08	30	0	-0.0109189	0	0	636211	-0.16	20.5
05-05-2021 04:54:39	11.2325	0	5.08	30	0	-0.0109189	0	0	636211	-0.16	20.5
05-05-2021 04:55:39	11.2492	0	5.08	30	0	-0.0109189	0	0	636211	-0.16	20.5
05-05-2021 04:56:39	11.2658	0	5.08	30	0	-0.0109189	0	0	636211	-0.16	20.5
05-05-2021 04:57:39	11.2825	0	5.08	30	0	-0.0109189	0	0	636211	-0.16	20.5
05-05-2021 04:58:39	11.2992	0	5.08	30	0	-0.0109189	0	0	636211	-0.16	20.5
05-05-2021 04:59:39	11.3158	0	5.07	30	0	-0.0109189	0	0	636211	-0.16	20.5
05-05-2021 05:00:39	11.3325	0	5.07	30	0	-0.0109189	0	0	636211	-0.16	20.5
05-05-2021 05:01:39	11.3492	0	5.07	30	0	-0.0109189	0	0	636211	-0.16	20.5
05-05-2021 05:02:39	11.3658	0	5.07	30	0	-0.0109189	0	0	636211	-0.16	20.5
05-05-2021 05:03:39	11.3825	0	5.07	30	0	-0.0109189	0	0	636211	-0.16	20.5
05-05-2021 05:04:39	11.3992	0	5.07	30	0	-0.0109189	0	0	636211	-0.16	20.5
05-05-2021 05:05:39	11.4158	0	5.07	30	0	-0.0109189	0	0	636211	-0.16	20.5
05-05-2021 05:06:39	11.4325	0	5.06	30	0	-0.0109189	0	0	636211	-0.16	20.5
05-05-2021 05:07:39	11.4492	0	5.06	30	0	-0.0109189	0	0	636211	-0.16	20.5
05-05-2021 05:08:39	11.4658	0	5.06	30	0	-0.0109189	0	0	636211	-0.16	20.5
05-05-2021 05:09:39	11.4825	0	5.06	30	0	-0.0109189	0	0	636211	-0.16	20.5
05-05-2021 05:10:39	11.4992	0	5.06	30	0	-0.0109189	0	0	636211	-0.16	20.5
05-05-2021 05:11:39	11.5158	0	5.06	30	0	-0.0109189	0	0	636211	-0.16	20.5
05-05-2021 05:12:39	11.5325	0	5.06	30	0	-0.0109189	0	0	636211	-0.16	20.5
05-05-2021 05:13:39	11.5492	0	5.05	30	0	-0.0109189	0	0	636211	-0.16	20.5
05-05-2021 05:14:39	11.5658	0	5.05	30	0	-0.0109189	0	0	636211	-0.16	20.5
05-05-2021 05:15:39	11.5825	0	5.05	30	0	-0.0109189	0	0	636211	-0.16	20.5
05-05-2021 05:16:39	11.5992	0	5.05	30	0	-0.0109189	0	0	636211	-0.16	20.5
05-05-2021 05:17:39	11.6158	0	5.05	30	0	-0.0109189	0	0	636211	-0.16	20.5
05-05-2021 05:18:39	11.6325	0	5.05	30	0	-0.0109189	0	0	636211	-0.16	20.5
05-05-2021 05:19:39	11.6492	0	5.05	30	0	-0.0109189	0	0	636211	-0.16	20.5
05-05-2021 05:20:39	11.6658	0	5.04	30	0	-0.0109189	0	0	636211	-0.16	20.5
05-05-2021 05:21:39	11.6825	0	5.04	30	0	-0.0109189	0	0	636211	-0.16	20.5
05-05-2021 05:22:39	11.6992	0	5.04	30	0	-0.0109189	0	0	636211	-0.16	20.5
05-05-2021 05:23:39	11.7158	0	5.04	30	0	-0.0109189	0	0	636211	-0.16	20.5
05-05-2021 05:24:39	11.7325	0	5.04	30	0	-0.0109189	0	0	636211	-0.16	20.5
05-05-2021 05:25:39	11.7492	0	5.04	30	0	-0.0109189	0	0	636211	-0.16	20.5
05-05-2021 05:26:39	11.7658	0	5.04	30	0	-0.0109189	0	0	636211	-0.16	20.5
05-05-2021 05:27:39	11.7825	0	5.03	30	0	-0.0109189	0	0	636211	-0.16	20.5
05-05-2021 05:28:39	11.7992	0	5.03	30	0	-0.0109189	0	0	636211	-0.16	20.5
05-05-2021 05:29:39	11.8158	0	5.03	30	0	-0.0109189	0	0	636211	-0.16	20.5
05-05-2021 05:30:39	11.8325	0	5.03	30	0	-0.0109189	0	0	636211	-0.16	20.5
05-05-2021 05:31:39	11.8492	0	5.03	30	0	-0.0109189	0	0	636211	-0.16	20.5
05-05-2021 05:32:39	11.8658	0	5.03	30	0	-0.0109189	0	0	636211	-0.16	20.5
05-05-2021 05:33:39	11.8825	0	5.03	30	0	-0.0109189	0	0	636211	-0.16	20.5
05-05-2021 05:34:39	11.8992	0	5.02	30	0	-0.0109189	0	0	636211	-0.16	20.5
05-05-2021 05:35:39	11.9158	0	5.02	30	0	-0.0109189	0	0	636211	-0.16	20.5
05-05-2021 05:36:39	11.9325	0	5.02	30	0	-0.0109189	0	0	636211	-0.16	20.5
05-05-2021 05:37:39	11.9492	0	5.02	30	0	-0.0109189	0	0	636211	-0.16	20.5
05-05-2021 05:38:39	11.9658	0	5.02	30	0	-0.0109189	0	0	636211	-0.16	20.5
05-05-2021 05:39:39	11.9825	0	5.02	30	0	-0.0109189	0	0	636211	-0.16	20.5
05-05-2021 05:40:39	11.9992	0	5.01	30	0	-0.0109189	0	0	636211	-0.16	20.5
05-05-2021 05:41:39	12.0158	0	5.01	30	0	-0.0109189	0	0	636211	-0.16	20.5
05-05-2021 05:42:39	12.0325	0	5.01	30	0	-0.0109189	0	0	636211	-0.16	20.5
05-05-2021 05:43:39	12.0492	0	5.01	30	0	-0.0109189	0	0	636211	-0.16	20.5
05-05-2021 05:44:39	12.0658	0	5.01	30	0	-0.0109189	0	0	636211	-0.16	20.5
05-05-2021 05:45:39	12.0825	0	5.01	30	0	-0.0109189	0	0	636211	-0.16	20.5
05-05-2021 05:46:39	12.0992	0	5	30	0	-0.0109189	0	0	636211	-0.16	20.5
05-05-2021 05:47:39	12.1158	0	5	30	0	-0.0109189	0	0	636211	-0.16	20.5
05-05-2021 05:48:39	12.1325	0	5	30	0	-0.0109189	0	0	636211	-0.16	20.5
05-05-2021 05:49:39	12.1492	0	5	30	0	-0.0109189	0	0	636211	-0.16	20.5
05-05-2021 05:50:39	12.1658	0	5	30	0	-0.0109189	0	0	636211	-0.16	20.5
05-05-2021 05:51:39	12.1825	0	5	30	0	-0.0109189	0	0	636211	-0.16	20.5
05-05-2021 05:52:39	12.1992	0	5	30	0	-0.0109189	0	0	636211	-0.16	20.5
05-05-2021 05:53:39	12.2158	0	4.99	30	0	-0.0109189	0	0	636211	-0.16	20.5
05-05-2021 05:54:39	12.2325	0	4.99	30	0	-0.0109189	0	0	636211	-0.16	20.5
05-05-2021 05:55:39	12.2492	0	4.99	30	0	-0.0109189	0	0	636211	-0.16	20.5
05-05-2021 05:56:39	12.2658	0	4.99	30	0	-0.0109189	0	0	636211	-0.16	20.5
05-05-2021 05:57:39	12.2825	0	4.99	30	0	-0.0109189	0	0	636211	-0.16	20.5
05-05-2021 05:58:39	12.2992	0	4.99	30	0	-0.0109189	0	0	636211	-0.16	20.5
05-05-2021 05:59:39	12.3158	0	4.98	30	0	-0.0109189	0	0	636211	-0.16	20.5
05-05-2021 06:00:39	12.3325	0	4.98	30	0	-0.0109189	0	0	636211	-0.16	20.5
05-05-2021 06:01:39	12.3492	0	4.98	30	0	-0.0109189	0	0	636211	-0.16	20.5
05-05-2021 06:02:39	12.3658	0	4.98	30	0	-0.0109189	0	0	636211	-0.16	20.5
05-05-2021 06:03:39	12.3825	0	4.98	30	0	-0.0109189	0	0	636211	-0.16	20.5
05-05-2021 06:04:39	12.3992	0	4.98	30	0	-0.0109189	0	0	636211	-0.16	20.5
05-05-2021 06:05:39	12.4158	0	4.97	30	0	-0.0109189	0	0	636211	-0.16	20.5
05-05-2021 06:06:39	12.4325	0	4.97	30	0	-0.0109189	0	0	636211	-0.16	20.5
05-05-2021 06:07:39	12.4492	0	4.97	30	0	-0.0109189	0	0	636211	-0.16	20.5
05-05-2021 06:08:39	12.4658	0	4.97	30	0	-0.0109189	0	0	636211	-0.16	20.5
05-05-2021 06:09:39	12.4825	0	4.97	30	0	-0.0109189	0	0	636211	-0.16	20.5
05-05-2021 06:10:39	12.4992	0	4.96	30	0	-0.0109189	0	0	636211	-0.16	20.5
05-05-2021 06:11:39	12.5158	0	4.96	30	0	-0.0109189	0	0	636211	-0.16	20.5
05-05-2021 06:12:39	12.5325	0	4.96	30	0	-0.0109189	0	0	636211	-0.16	20.5
05-05-2021 06:13:39	12.5492	0	4.96	30	0	-0.0109189	0	0	636211	-0.16	20.5
05-05-2021 06:14:39	12.5658	0	4.96	30	0	-0.0109189	0	0	636211	-0.16	20.5
05-05-2021 06:15:39	12.5825	0	4.96	30	0	-0.0109189	0	0	636211	-0.16	20.5
05-05-2021 06:16:39	12.5992	0	4.99	30	0	-0.0109189	0	0	636211	-0.16	20.5
05-05-2021 06:17:39	12.6158	0	4.98	30	0	-0.0109189	0	0	636211	-0.16	20.5
05-05-2021 06:18:39	12.6325	0	4.98	30	0	-0.0109189	0	0	636211	-0.16	20.5
05-05-2021 06:19:39	12.6492	0	4.98	30	0	-0.0109189	0	0	636211	-0.16	20.5
05-05-2021 06:20:39	12.6658	0	4.98	30	0	-0.0109189	0	0	636211	-0.16	20.5
05-05-2021 06:21:39	12.6825	0	4.98	30	0	-0.0109189	0	0	636211	-0.16	20.5
05-05-2021 06:22:39	12.6992	0	4.98	30	0	-0.0109189	0	0	636211	-0.16	20.5
05-05-2021 06:23:39	12.7158	0	4.97	30	0	-0.0109189	0	0	636211	-0.16	20.5
05-05-2021 06:24:39	12.7325	0	4.97	29.9	0	-0.0109189	0	0	636211	-0.16	20.5
05-05-2021 06:25:39	12.7492	0	4.97	29.9	0	-0.0109189	0	0	636211	-0.16	20.5
05-05-2021 06:26:39	12.7658	0	4.97	29.9	0	-0.0109189	0	0	636211	-0.16	20.5
05-05-2021 06:27:39	12.7825	0	4.97	29.9	0	-0.0109189	0	0	636211	-0.16	20.5
05-05-2021 06:28:39	12.7992	0	4.96	29.9	0	-0.0109189	0	0	636211	-0.16	20.5
05-05-2021 06:29:39	12.8158	0	4.96	29.9	0	-0.0109189	0	0	636211	-0.16	20.5
05-05-2021 06:30:39	12.8325	0	4.96	29.9	0	-0.0109189	0	0	636211	-0.16	20.5
05-05-2021 06:31:39	12.8492	0	4.96	30	0	-0.0109189	0	0	636211	-0.16	20.5
05-05-2021 06:32:39	12.8658	0	4.96	30	0	-0.0109189	0	0	636211	-0.16	20.5
05-05-2021 06:33:39	12.8825	0	4.96	30	0	-0.0109189	0	0	636211	-0.16	20.5
05-05-2021 06:34:39	12.8992	0	4.95	30	0	-0.0109189	0	0	636211	-0.16	20.5
05-05-2021 06:35:39	12.9158	0	4.95	30	0	-0.0109189	0	0	636211	-0.16	20.5
05-05-2021 06:36:39	12.9325	0	4.95	30	0	-0.0109189	0	0	636211	-0.16	20.5
05-05-2021 06:37:39	12.9492	0	5.02	30	0	-0.0109189	0	1.1	636211	-0.16	20.5
05-05-2021 06:38:39	12.9658	0	5.02	30	0	-0.0109189	0	1.1	636211	-0.16	20.5
05-05-2021 06:39:39	12.9825	0	5.02	30	0	-0.0109189	0	1.1	636211	-0.16	20.5
05-05-2021 06:40:39	12.9992	0	5.02	30	0	-0.0109189	0	1.1	636211	-0.16	20.5
05-05-2021 06:41:39	13.0158	0	5.01	30	0	-0.0109189	0	1.1	636211	-0.16	20.5
05-05-2021 06:42:39	13.0325	0	5.01	30	0	-0.0109189	0	1.1	636211	-0.16	20.5
05-05-2021 06:43:39	13.0492	0	5.01	30	0	-0.0109189	0	1.1	636211	-0.16	20.5
05-05-2021 06:44:39	13.0658	0	5.01	30	0	-0.0109189	0	1.1	636211	-0.16	20.5
05-05-2021 06:45:39	13.0825	0	5.01	30	0	-0.0109189	0	1.1	636211	-0.16	20.5
05-05-2021 06:46:39	13.0992	0	5	30	0	-0.0109189	0	1.1	636211	-0.16	20.5
05-05-2021 06:47:39	13.1158	0	5	30	0	-0.0109189	0	1.1	636211	-0.16	20.5
05-05-2021 06:48:39	13.1325	0	5	30	0	-0.0109189	0	1.1	636211	-0.16	20.5
05-05-2021 06:49:39	13.1492	0	5	30	0	-0.0109189	0	1.1	636211	-0.16	20.5
05-05-2021 06:50:39	13.1658	0	5	30	0	-0.0109189	0	1.1	636211	-0.16	20.5
05-05-2021 06:51:39	13.1825	0	5	30	0	-0.0109189	0	1.1	636211	-0.16	20.5
05-05-2021 06:52:39	13.1992	0	4.99	30	0	-0.0109189	0	1.1	636211	-0.16	20.5
05-05-2021 06:53:39	13.2158	0	4.99	30	0	-0.0109189	0	1.1	636211	-0.16	20.5
05-05-2021 06:54:39	13.2325	0	4.99	30	0	-0.0109189	0	1.1	636211	-0.16	20.5
05-05-2021 06:55:39	13.2492	0	4.99	30	0	-0.0109189	0	1.1	636211	-0.16	20.5
05-05-2021 06:56:39	13.2658	0	4.99	30	0	-0.0109189	0	1.1	636211	-0.16	20.5
05-05-2021 06:57:39	13.2825	0	4.98	30	0	-0.0109189	0	1.1	636211	-0.16	20.5
05-05-2021 06:58:39	13.2992	0	4.98	30	0	-0.0109189	0	1.1	636211	-0.16	20.5
05-05-2021 06:59:39	13.3158	0	4.98	30	0	-0.0109189	0	1.1	636211	-0.16	20.5
05-05-2021 07:00:39	13.3325	0	4.98	30	0	-0.0109189	0	1.1	636211	-0.16	20.5
05-05-2021 07:01:39	13.3492	0	4.98	30	0	-0.0109189	0	1.1	636211	-0.16	20.5
05-05-2021 07:02:39	13.3658	0	4.97	30	0	-0.0109189	0	1.1	636211	-0.16	20.5
05-05-2021 07:03:39	13.3825	0	4.97	30	0	-0.0109189	0	1.1	636211	-0.16	20.5
05-05-2021 07:04:39	13.3992	0	4.97	30	0	-0.0109189	0	1.1	636211	-0.16	20.5
05-05-2021 07:05:39	13.4158	0	4.97	30	0	-0.0109189	0	1.1	636211	-0.16	20.5
05-05-2021 07:06:39	13.4325	0	4.97	30	0	-0.0109189	0	1.1	636211	-0.16	20.5
05-05-2021 07:07:39	13.4492	0	4.97	30	0	-0.0109189	0	1.1	636211	-0.16	20.5
05-05-2021 07:08:39	13.4658	0	4.96	30	0	-0.0109189	0	1.1	636211	-0.16	20.5
05-05-2021 07:09:39	13.4825	0	4.96	30	0	-0.0109189	0	1.1	636211	-0.16	20.5
05-05-2021 07:10:39	13.4992	0	4.96	30	0	-0.0109189	0	1.1	636211	-0.16	20.5
05-05-2021 07:11:39	13.5158	0	4.96	30	0	-0.0109189	0	1.1	636211	-0.16	20.5
05-05-2021 07:12:39	13.5325	0	4.95	30	0	-0.0109189	0	1.1	636211	-0.16	20.5
05-05-2021 07:13:39	13.5492	0	4.95	30	0	-0.0109189	0	1.1	636211	-0.16	20.5
05-05-2021 07:14:39	13.5658	0	4.95	30	0	-0.0109189	0	1.1	636211	-0.16	20.5
05-05-2021 07:15:39	13.5825	0	4.99	30	0	-0.0109189	0	1.6	636211	-0.16	20.5
05-05-2021 07:16:39	13.5992	0	4.99	30	0	-0.0109189	0	1.6	636211	-0.16	20.5
05-05-2021 07:17:39	13.6158	0	4.99	30	0	-0.0109189	0	1.6	636211	-0.16	20.5
05-05-2021 07:18:39	13.6325	0	4.98	30	0	-0.0109189	0	1.6	636211	-0.16	20.5
05-05-2021 07:19:39	13.6492	0	4.98	30	0	-0.0109189	0	1.6	636211	-0.16	20.5
05-05-2021 07:20:39	13.6658	0	4.98	30	0	-0.0109189	0	1.6	636211	-0.16	20.5
05-05-2021 07:21:39	13.6825	0	4.98	30	0	-0.0109189	0	1.6	636211	-0.16	20.5
05-05-2021 07:22:39	13.6992	0	4.98	30	0	-0.0109189	0	1.6	636211	-0.16	20.5
05-05-2021 07:23:39	13.7158	0	4.97	30	0	-0.0109189	0	1.6	636211	-0.16	20.5
05-05-2021 07:24:39	13.7325	0	5	30	0	-0.0109189	0	1.6	636211	-0.16	20.5
05-05-2021 07:25:39	13.7492	0	5	30	0	-0.0109189	0	1.6	636211	-0.16	20.5
05-05-2021 07:26:39	13.7658	0	5	30	0	-0.0109189	0	1.6	636211	-0.16	20.5
05-05-2021 07:27:39	13.7825	0	4.99	30	0	-0.0109189	0	1.6	636211	-0.16	20.5
05-05-2021 07:28:39	13.7992	0	4.99	30	0	-0.0109189	0	1.6	636211	-0.16	20.5
05-05-2021 07:29:39	13.8158	0	4.99	30	0	-0.0109189	0	1.6	636211	-0.16	20.5
05-05-2021 07:30:39	13.8325	0	4.99	30	0	-0.0109189	0	1.6	636211	-0.16	20.5
05-05-2021 07:31:39	13.8492	0	4.99	30	0	-0.0109189	0	1.6	636211	-0.16	20.5
05-05-2021 07:32:39	13.8658	0	4.98	30	0	-0.0109189	0	1.6	636211	-0.16	20.5
05-05-2021 07:33:39	13.8825	0	4.98	30	0	-0.0109189	0	1.6	636211	-0.16	20.5
05-05-2021 07:34:39	13.8992	0	4.98	30	0	-0.0109189	0	1.6	636211	-0.16	20.5
05-05-2021 07:35:39	13.9158	0	4.98	30	0	-0.0109189	0	1.6	636211	-0.16	20.5
05-05-2021 07:36:39	13.9325	0	4.98	30	0	-0.0109189	0	1.6	636211	-0.16	20.5
05-05-2021 07:37:39	13.9492	0	4.97	30	0	-0.0109189	0	1.6	636211	-0.16	20.5
05-05-2021 07:38:39	13.9658	0	4.97	30	0	-0.0109189	0	1.6	636211	-0.16	20.5
05-05-2021 07:39:39	13.9825	0	4.97	30	0	-0.0109189	0	1.6	636211	-0.16	20.5
05-05-2021 07:40:39	13.9992	0	4.97	30	0	-0.0109189	0	1.6	636211	-0.16	20.5
05-05-2021 07:41:39	14.0158	0	4.97	30	0	-0.0109189	0	1.6	636211	-0.16	20.5
05-05-2021 07:42:39	14.0325	0	4.96	30	0	-0.0109189	0	1.6	636211	-0.16	20.5
05-05-2021 07:43:39	14.0492	0	4.96	30	0	-0.0109189	0	1.6	636211	-0.16	20.5
05-05-2021 07:44:39	14.0658	0	4.96	30	0	-0.0109189	0	1.6	636211	-0.16	20.5
05-05-2021 07:45:39	14.0825	0	4.96	30	0	-0.0109189	0	1.6	636211	-0.16	20.5
05-05-2021 07:46:39	14.0992	0	4.95	30	0	-0.0109189	0	1.6	636211	-0.16	20.5
05-05-2021 07:47:39	14.1158	0	4.95	30	0	-0.0109189	0	1.6	636211	-0.16	20.5
05-05-2021 07:48:39	14.1325	0	4.99	30	0	-0.0109189	0	2.7	636211	-0.16	20.5
05-05-2021 07:49:39	14.1492	0	4.99	30	0	-0.0109189	0	2.7	636211	-0.16	20.5
05-05-2021 07:50:39	14.1658	0	4.99	30	0	-0.0109189	0	2.7	636211	-0.16	20.5
05-05-2021 07:51:39	14.1825	0	4.99	30	0	-0.0109189	0	2.7	636211	-0.16	20.5
05-05-2021 07:52:39	14.1992	0	4.98	30	0	-0.0109189	0	2.7	636211	-0.16	20.5
05-05-2021 07:53:39	14.2158	0	4.98	30	0	-0.0109189	0	2.7	636211	-0.16	20.5
05-05-2021 07:54:39	14.2325	0	4.98	30	0	-0.0109189	0	2.7	636211	-0.16	20.5
05-05-2021 07:55:39	14.2492	0	4.98	30	0	-0.0109189	0	2.7	636211	-0.16	20.5
05-05-2021 07:56:39	14.2658	0	4.97	30	0	-0.0109189	0	2.7	636211	-0.16	20.5
05-05-2021 07:57:39	14.2825	0	4.97	30	0	-0.0109189	0	2.7	636211	-0.16	20.5
05-05-2021 07:58:39	14.2992	0	4.97	30	0	-0.0109189	0	2.7	636211	-0.16	20.5
05-05-2021 07:59:39	14.3158	0	4.97	30	0	-0.0109189	0	2.7	636211	-0.16	20.5
05-05-2021 08:00:39	14.3325	0	4.97	30	0	-0.0109189	0	2.7	636211	-0.16	20.5
05-05-2021 08:01:39	14.3492	0	4.96	30	0	-0.0109189	0	2.7	636211	-0.16	20.5
05-05-2021 08:02:39	14.3658	0	4.96	30	0	-0.0109189	0	2.7	636211	-0.16	20.5
05-05-2021 08:03:39	14.3825	0	4.96	30	0	-0.0109189	0	2.7	636211	-0.16	20.5
05-05-2021 08:04:39	14.3992	0	4.96	30	0	-0.0109189	0	2.7	636211	-0.16	20.5
05-05-2021 08:05:39	14.4158	0	4.98	30	0	-0.0109189	0	2.7	636211	-0.16	20.5
05-05-2021 08:06:39	14.4325	0	4.98	30	0	-0.0109189	0	2.7	636211	-0.16	20.5
05-05-2021 08:07:39	14.4492	0	4.98	30	0	-0.0109189	0	2.7	636211	-0.16	20.5
05-05-2021 08:08:39	14.4658	0	4.98	30	0	-0.0109189	0	2.7	636211	-0.16	20.5
05-05-2021 08:09:39	14.4825	0	4.98	30	0	-0.0109189	0	2.7	636211	-0.16	20.5
05-05-2021 08:10:39	14.4992	0	4.97	30	0	-0.0109189	0	2.7	636211	-0.16	20.5
05-05-2021 08:11:39	14.5158	0	4.97	30	0	-0.0109189	0	2.7	636211	-0.16	20.5
05-05-2021 08:12:39	14.5325	0	4.97	30	0	-0.0109189	0	2.7	636211	-0.16	20.5
05-05-2021 08:13:39	14.5492	0	4.97	30	0	-0.0109189	0	2.7	636211	-0.16	20.5
05-05-2021 08:14:39	14.5658	0	4.96	30	0	-0.0109189	0	2.7	636211	-0.16	20.5
05-05-2021 08:15:39	14.5825	0	4.96	30	0	-0.0109189	0	2.7	636211	-0.16	20.5
05-05-2021 08:16:39	14.5992	0	4.96	30	0	-0.0109189	0	2.7	636211	-0.16	20.5
05-05-2021 08:17:39	14.6158	0	4.96	30	0	-0.0109189	0	2.7	636211	-0.16	20.5
05-05-2021 08:18:39	14.6325	0	4.95	30	0	-0.0109189	0	2.7	636211	-0.16	20.5
05-05-2021 08:19:39	14.6492	0	4.95	30	0	-0.0109189	0	2.7	636211	-0.16	20.5
05-05-2021 08:20:39	14.6658	0	4.99	30	0	-0.0109189	0	3.2	636211	-0.16	20.5
05-05-2021 08:21:39	14.6825	0	4.99	30	0	-0.0109189	0	3.2	636211	-0.16	20.5
05-05-2021 08:22:39	14.6992	0	4.99	30	0	-0.0109189	0	3.2	636211	-0.16	20.5
05-05-2021 08:23:39	14.7158	0	4.99	30	0	-0.0109189	0	3.2	636211	-0.16	20.5
05-05-2021 08:24:39	14.7325	0	4.99	30	0	-0.0109189	0	3.2	636211	-0.16	20.5
05-05-2021 08:25:39	14.7492	0	4.98	30	0	-0.0109189	0	3.2	636211	-0.16	20.5
05-05-2021 08:26:39	14.7658	0	4.98	30	0	-0.0109189	0	3.2	636211	-0.16	20.5
05-05-2021 08:27:39	14.7825	0	4.98	30	0	-0.0109189	0	3.2	636211	-0.16	20.5
05-05-2021 08:28:39	14.7992	0	4.98	30	0	-0.0109189	0	3.2	636211	-0.16	20.5
05-05-2021 08:29:39	14.8158	0	4.97	30	0	-0.0109189	0	3.2	636211	-0.16	20.5
05-05-2021 08:30:39	14.8325	0	4.97	30	0	-0.0109189	0	3.2	636211	-0.16	20.5
05-05-2021 08:31:39	14.8492	0	4.97	30	0	-0.0109189	0	3.2	636211	-0.16	20.5
05-05-2021 08:32:39	14.8658	0	4.97	30	0	-0.0109189	0	3.2	636211	-0.16	20.5
05-05-2021 08:33:39	14.8825	0	4.96	30	0	-0.0109189	0	3.2	636211	-0.16	20.5
05-05-2021 08:34:39	14.8992	0	4.96	30	0	-0.0109189	0	3.2	636211	-0.16	20.5
05-05-2021 08:35:39	14.9158	0	4.96	30	0	-0.0109189	0	3.2	636211	-0.16	20.5
05-05-2021 08:36:39	14.9325	0	4.96	30	0	-0.0109189	0	3.2	636211	-0.16	20.5
05-05-2021 08:37:39	14.9492	0	4.95	30	0	-0.0109189	0	3.2	636211	-0.16	20.5
05-05-2021 08:38:39	14.9658	0	4.95	30	0	-0.0109189	0	3.2	636211	-0.16	20.5
05-05-2021 08:39:39	14.9825	0	4.95	30	0	-0.0109189	0	3.7	636211	-0.16	20.5
05-05-2021 08:40:39	14.9992	0	4.98	30	0	-0.0109189	0	3.7	636211	-0.16	20.5
05-05-2021 08:41:39	15.0158	0	4.98	30	0	-0.0109189	0	3.7	636211	-0.16	20.5
05-05-2021 08:42:39	15.0325	0	4.98	30	0	-0.0109189	0	3.7	636211	-0.16	20.5
05-05-2021 08:43:39	15.0492	0	4.98	30	0	-0.0109189	0	3.7	636211	-0.16	20.5
05-05-2021 08:44:39	15.0658	0	4.97	30	0	-0.0109189	0	3.7	636211	-0.16	20.5
05-05-2021 08:45:39	15.0825	0	4.97	30	0	-0.0109189	0	3.7	636211	-0.16	20.5
05-05-2021 08:46:39	15.0992	0	4.97	30	0	-0.0109189	0	3.7	636211	-0.16	20.5
05-05-2021 08:47:39	15.1158	0	4.97	30	0	-0.0109189	0	3.7	636211	-0.16	20.5
05-05-2021 08:48:39	15.1325	0	4.96	30	0	-0.0109189	0	3.7	636211	-0.16	20.5
05-05-2021 08:49:39	15.1492	0	4.96	30	0	-0.0109189	0	3.7	636211	-0.16	20.5
05-05-2021 08:50:39	15.1658	0	4.96	30	0	-0.0109189	0	3.7	636211	-0.16	20.5
05-05-2021 08:51:39	15.1825	0	4.95	30	0	-0.0109189	0	3.7	636211	-0.16	20.5
05-05-2021 08:52:39	15.1992	0	4.95	30	0	-0.0109189	0	3.7	636211	-0.16	20.5
05-05-2021 08:53:39	15.2158	0	4.95	30	0	-0.0109189	0	3.7	636211	-0.16	20.5
05-05-2021 08:54:39	15.2325	0	5.02	30	0	-0.0109189	0	4.8	636211	-0.16	20.5
05-05-2021 08:55:39	15.2492	0	5.02	30	0	-0.0109189	0	4.8	636211	-0.16	20.5
05-05-2021 08:56:39	15.2658	0	5.01	30	0	-0.0109189	0	4.8	636211	-0.16	20.5
05-05-2021 08:57:39	15.2825	0	5.01	30	0	-0.0109189	0	4.8	636211	-0.16	20.5
05-05-2021 08:58:39	15.2992	0	5.01	30	0	-0.0109189	0	4.8	636211	-0.16	20.5
05-05-2021 08:59:39	15.3158	0	5.01	30	0	-0.0109189	0	4.8	636211	-0.16	20.5
05-05-2021 09:00:39	15.3325	0	5	30	0	-0.0109189	0	4.8	636211	-0.16	20.5
05-05-2021 09:01:39	15.3492	0	5	30	0	-0.0109189	0	4.8	636211	-0.16	20.5
05-05-2021 09:02:39	15.3658	0	5	30	0	-0.0109189	0	4.8	636211	-0.16	20.5
05-05-2021 09:03:39	15.3825	0	5	30	0	-0.0109189	0	4.8	636211	-0.16	20.5
05-05-2021 09:04:39	15.3992	0	4.99	30	0	-0.0109189	0	4.8	636211	-0.16	20.5
05-05-2021 09:05:39	15.4158	0	4.99	30	0	-0.0109189	0	4.8	636211	-0.16	20.5
05-05-2021 09:06:39	15.4325	0	4.99	30	0	-0.0109189	0	4.8	636211	-0.16	20.5
05-05-2021 09:07:39	15.4492	0	4.99	30	0	-0.0109189	0	4.8	636211	-0.16	20.5
05-05-2021 09:08:39	15.4658	0	4.98	30	0	-0.0109189	0	4.8	636211	-0.16	20.5
05-05-2021 09:09:39	15.4825	0	4.98	30	0	-0.0109189	0	4.8	636211	-0.16	20.5
05-05-2021 09:10:39	15.4992	0	4.98	30	0	-0.0109189	0	4.8	636211	-0.16	20.5
05-05-2021 09:11:39	15.5158	0	4.98	30	0	-0.0109189	0	4.8	636211	-0.16	20.5
05-05-2021 09:12:39	15.5325	0	4.97	30	0	-0.0109189	0	4.8	636211	-0.16	20.5
05-05-2021 09:13:39	15.5492	0	4.97	30	0	-0.0109189	0	4.8	636211	-0.16	20.5
05-05-2021 09:14:39	15.5658	0	4.97	30	0	-0.0109189	0	4.8	636211	-0.16	20.5
05-05-2021 09:15:39	15.5825	0	4.97	30	0	-0.0109189	0	4.8	636211	-0.16	20.5
05-05-2021 09:16:39	15.5992	0	4.96	30	0	-0.0109189	0	4.8	636211	-0.16	20.5
05-05-2021 09:17:39	15.6158	0	4.96	30	0	-0.0109189	0	4.8	636211	-0.16	20.5
05-05-2021 09:18:39	15.6325	0	4.96	30	0	-0.0109189	0	4.8	636211	-0.16	20.5
05-05-2021 09:19:39	15.6492	0	4.96	30	0	-0.0109189	0	4.8	636211	-0.16	20.5
05-05-2021 09:20:39	15.6658	0	4.95	30	0	-0.0109189	0	4.8	636211	-0.16	20.5
05-05-2021 09:21:39	15.6825	0	4.95	30	0	-0.0109189	0	4.8	636211	-0.16	20.5
05-05-2021 09:22:39	15.6992	0	5.01	30	0	-0.0109189	0	5.3	636211	-0.16	20.5
05-05-2021 09:23:39	15.7158	0	5.01	30	0	-0.0109189	0	5.3	636211	-0.16	20.5
05-05-2021 09:24:39	15.7325	0	5.01	30	0	-0.0109189	0	5.3	636211	-0.16	20.5
05-05-2021 09:25:39	15.7492	0	5	30	0	-0.0109189	0	5.3	636211	-0.16	20.5
05-05-2021 09:26:39	15.7658	0	5	30	0	-0.0109189	0	5.3	636211	-0.16	20.5
05-05-2021 09:27:39	15.7825	0	5	30	0	-0.0109189	0	5.3	636211	-0.16	20.5
05-05-2021 09:28:39	15.7992	0	5	30	0	-0.0109189	0	5.3	636211	-0.16	20.5
05-05-2021 09:29:39	15.8158	0	4.99	30	0	-0.0109189	0	5.3	636211	-0.16	20.5
05-05-2021 09:30:39	15.8325	0	4.99	30	0	-0.0109189	0	5.3	636211	-0.16	20.5
05-05-2021 09:31:39	15.8492	0	4.99	30	0	-0.0109189	0	5.3	636211	-0.16	20.5
05-05-2021 09:32:39	15.8658	0	4.98	30	0	-0.0109189	0	5.3	636211	-0.16	20.5
05-05-2021 09:33:39	15.8825	0	4.98	30	0	-0.0109189	0	5.3	636211	-0.16	20.5
05-05-2021 09:34:39	15.8992	0	4.98	30	0	-0.0109189	0	5.3	636211	-0.16	20.5
05-05-2021 09:35:39	15.9158	0	4.98	30	0	-0.0109189	0	5.3	636211	-0.16	20.5
05-05-2021 09:36:39	15.9325	0	4.97	30	0	-0.0109189	0	5.3	636211	-0.16	20.5
05-05-2021 09:37:39	15.9492	0	4.97	30	0	-0.0109189	0	5.3	636211	-0.16	20.5
05-05-2021 09:38:39	15.9658	0	4.97	30	0	-0.0109189	0	5.3	636211	-0.16	20.5
05-05-2021 09:39:39	15.9825	0	4.97	30	0	-0.0109189	0	5.3	636211	-0.16	20.5
05-05-2021 09:40:39	15.9992	0	4.96	30	0	-0.0109189	0	5.3	636211	-0.16	20.5
05-05-2021 09:41:39	16.0158	0	4.96	30	0	-0.0109189	0	5.3	636211	-0.16	20.5
05-05-2021 09:42:39	16.0325	0	4.96	30	0	-0.0109189	0	5.3	636211	-0.16	20.5
05-05-2021 09:43:39	16.0492	0	4.95	30	0	-0.0109189	0	5.3	636211	-0.16	20.5
05-05-2021 09:44:39	16.0658	0	4.95	30	0	-0.0109189	0	5.3	636211	-0.16	20.5
05-05-2021 09:45:39	16.0825	0	4.99	30	0	-0.0109189	0	6.4	636211	-0.16	20.5
05-05-2021 09:46:39	16.0992	0	4.99	30	0	-0.0109189	0	6.4	636211	-0.16	20.5
05-05-2021 09:47:39	16.1158	0	4.99	30	0	-0.0109189	0	6.4	636211	-0.16	20.5
05-05-2021 09:48:39	16.1325	0	4.98	30	0	-0.0109189	0	6.4	636211	-0.16	20.5
05-05-2021 09:49:39	16.1492	0	4.98	30	0	-0.0109189	0	6.4	636211	-0.16	20.5
05-05-2021 09:50:39	16.1658	0	4.98	30	0	-0.0109189	0	6.4	636211	-0.16	20.5
05-05-2021 09:51:39	16.1825	0	4.97	30	0	-0.0109189	0	6.4	636211	-0.16	20.5
05-05-2021 09:52:39	16.1992	0	4.97	30	0	-0.0109189	0	6.4	636211	-0.16	20.5
05-05-2021 09:53:39	16.2158	0	4.97	30	0	-0.0109189	0	6.4	636211	-0.16	20.5
05-05-2021 09:54:39	16.2325	0	4.96	30	0	-0.0109189	0	6.4	636211	-0.16	20.5
05-05-2021 09:55:39	16.2492	0	4.96	30	0	-0.0109189	0	6.4	636211	-0.16	20.5
05-05-2021 09:56:39	16.2658	0	4.96	30	0	-0.0109189	0	6.4	636211	-0.16	20.5
05-05-2021 09:57:39	16.2825	0	4.99	30	0	-0.0109189	0	6.4	636211	-0.16	20.5
05-05-2021 09:58:39	16.2992	0	4.98	30	0	-0.0109189	0	6.4	636211	-0.16	20.5
05-05-2021 09:59:39	16.3158	0	4.98	30	0	-0.0109189	0	6.4	636211	-0.16	20.5
05-05-2021 10:00:39	16.3325	0	4.98	30	0	-0.0109189	0	6.4	636211	-0.16	20.5
05-05-2021 10:01:39	16.3492	0	4.97	30	0	-0.0109189	0	6.4	636211	-0.16	20.5
05-05-2021 10:02:39	16.3658	0	4.97	30	0	-0.0109189	0	6.4	636211	-0.16	20.5
05-05-2021 10:03:39	16.3825	0	4.97	30	0	-0.0109189	0	6.4	636211	-0.16	20.5
05-05-2021 10:04:39	16.3992	0	4.96	30	0	-0.0109189	0	6.4	636211	-0.16	20.6
05-05-2021 10:05:39	16.4158	0	4.96	30	0	-0.0109189	0	6.4	636211	-0.16	20.6
05-05-2021 10:06:39	16.4325	0	4.96	30	0	-0.0109189	0	6.4	636211	-0.16	20.6
05-05-2021 10:07:39	16.4492	0	4.96	30	0	-0.0109189	0	6.4	636211	-0.16	20.6
05-05-2021 10:08:39	16.4658	0	4.95	30	0	-0.0109189	0	6.4	636211	-0.16	20.6
05-05-2021 10:09:39	16.4825	0	4.95	30	0	-0.0109189	0	6.9	636211	-0.16	20.6
05-05-2021 10:10:39	16.4992	0	4.99	30	0	-0.0109189	0	6.9	636211	-0.16	20.6
05-05-2021 10:11:39	16.5158	0	4.99	30	0	-0.0109189	0	6.9	636211	-0.16	20.6
05-05-2021 10:12:39	16.5325	0	4.99	30	0	-0.0109189	0	6.9	636211	-0.16	20.6
05-05-2021 10:13:39	16.5492	0	4.98	30	0	-0.0109189	0	6.9	636211	-0.16	20.6
05-05-2021 10:14:39	16.5658	0	4.98	30	0	-0.0109189	0	6.9	636211	-0.16	20.6
05-05-2021 10:15:39	16.5825	0	4.98	30	0	-0.0109189	0	6.9	636211	-0.16	20.6
05-05-2021 10:16:39	16.5992	0	4.97	30	0	-0.0109189	0	6.9	636211	-0.16	20.6
05-05-2021 10:17:39	16.6158	0	4.97	30	0	-0.0109189	0	6.9	636211	-0.16	20.6
05-05-2021 10:18:39	16.6325	0	4.97	30	0	-0.0109189	0	6.9	636211	-0.16	20.6
05-05-2021 10:19:39	16.6492	0	4.96	30	0	-0.0109189	0	6.9	636211	-0.16	20.6
05-05-2021 10:20:39	16.6658	0	4.96	30	0	-0.0109189	0	6.9	636211	-0.16	20.6
05-05-2021 10:21:39	16.6825	0	4.96	30	0	-0.0109189	0	6.9	636211	-0.16	20.6
05-05-2021 10:22:39	16.6992	0	4.96	30	0	-0.0109189	0	6.9	636211	-0.16	20.6
05-05-2021 10:23:39	16.7158	0	4.95	30	0	-0.0109189	0	6.9	636211	-0.16	20.6
05-05-2021 10:24:39	16.7325	0	4.95	30	0	-0.0109189	0	7.4	636211	-0.16	20.6
05-05-2021 10:25:39	16.7492	0	5.02	30	0	-0.0109189	0	8	636211	-0.16	20.6
05-05-2021 10:26:39	16.7658	0	5.01	30	0	-0.0109189	0	8	636211	-0.16	20.6
05-05-2021 10:27:39	16.7825	0	5.01	30	0	-0.0109189	0	8	636211	-0.16	20.6
05-05-2021 10:28:39	16.7992	0	5.01	30	0	-0.0109189	0	8	636211	-0.16	20.6
05-05-2021 10:29:39	16.8158	0	5	30	0	-0.0109189	0	8	636211	-0.16	20.6
05-05-2021 10:30:39	16.8325	0	5	30	0	-0.0109189	0	8	636211	-0.16	20.6
05-05-2021 10:31:39	16.8492	0	5	30	0	-0.0109189	0	8	636211	-0.16	20.6
05-05-2021 10:32:39	16.8658	0	4.99	30	0	-0.0109189	0	8	636211	-0.16	20.6
05-05-2021 10:33:39	16.8825	0	4.99	30	0	-0.0109189	0	8	636211	-0.16	20.6
05-05-2021 10:34:39	16.8992	0	4.99	30	0	-0.0109189	0	8	636211	-0.16	20.6
05-05-2021 10:35:39	16.9158	0	4.98	30	0	-0.0109189	0	8	636211	-0.16	20.6
05-05-2021 10:36:39	16.9325	0	4.98	30	0	-0.0109189	0	8	636211	-0.16	20.6
05-05-2021 10:37:39	16.9492	0	4.98	30	0	-0.0109189	0	8	636211	-0.16	20.6
05-05-2021 10:38:39	16.9658	0	4.97	30	0	-0.0109189	0	8	636211	-0.16	20.6
05-05-2021 10:39:39	16.9825	0	4.97	30	0	-0.0109189	0	8	636211	-0.16	20.6
05-05-2021 10:40:39	16.9992	0	4.97	30	0	-0.0109189	0	8	636211	-0.16	20.6
05-05-2021 10:41:39	17.0158	0	4.96	30	0	-0.0109189	0	8	636211	-0.16	20.6
05-05-2021 10:42:39	17.0325	0	4.96	30	0	-0.0109189	0	8	636211	-0.16	20.6
05-05-2021 10:43:39	17.0492	0	4.96	30	0	-0.0109189	0	8	636211	-0.16	20.6
05-05-2021 10:44:39	17.0658	0	4.95	30	0	-0.0109189	0	8	636211	-0.16	20.6
05-05-2021 10:45:39	17.0825	0	4.95	30	0	-0.0109189	0	8	636211	-0.16	20.6
05-05-2021 10:46:39	17.0992	0	4.99	30	0	-0.0109189	0	8.5	636211	-0.16	20.6
05-05-2021 10:47:39	17.1158	0	4.99	30	0	-0.0109189	0	8.5	636211	-0.16	20.6
05-05-2021 10:48:39	17.1325	0	4.99	30	0	-0.0109189	0	8.5	636211	-0.16	20.6
05-05-2021 10:49:39	17.1492	0	4.98	30	0	-0.0109189	0	8.5	636211	-0.16	20.6
05-05-2021 10:50:39	17.1658	0	4.98	30	0	-0.0109189	0	8.5	636211	-0.16	20.6
05-05-2021 10:51:39	17.1825	0	4.98	30	0	-0.0109189	0	8.5	636211	-0.16	20.6
05-05-2021 10:52:39	17.1992	0	4.97	30	0	-0.0109189	0	8.5	636211	-0.16	20.6
05-05-2021 10:53:39	17.2158	0	4.97	30	0	-0.0109189	0	8.5	636211	-0.16	20.6
05-05-2021 10:54:39	17.2325	0	4.97	30	0	-0.0109189	0	8.5	636211	-0.16	20.6
05-05-2021 10:55:39	17.2492	0	4.96	30	0	-0.0109189	0	8.5	636211	-0.16	20.6
05-05-2021 10:56:39	17.2658	0	4.96	30	0	-0.0109189	0	8.5	636211	-0.16	20.6
05-05-2021 10:57:39	17.2825	0	4.96	30	0	-0.0109189	0	8.5	636211	-0.16	20.6
05-05-2021 10:58:39	17.2992	0	4.95	30	0	-0.0109189	0	8.5	636211	-0.16	20.6
05-05-2021 10:59:39	17.3158	0	4.99	30	0	-0.0109189	0	9	636211	-0.16	20.6
05-05-2021 11:00:39	17.3325	0	4.98	30	0	-0.0109189	0	9	636211	-0.16	20.6
05-05-2021 11:01:39	17.3492	0	4.98	30	0	-0.0109189	0	9	636211	-0.16	20.6
05-05-2021 11:02:39	17.3658	0	4.98	30	0	-0.0109189	0	9	636211	-0.16	20.6
05-05-2021 11:03:39	17.3825	0	4.97	30	0	-0.0109189	0	9	636211	-0.16	20.6
05-05-2021 11:04:39	17.3992	0	4.97	30	0	-0.0109189	0	9	636211	-0.16	20.6
05-05-2021 11:05:39	17.4158	0	4.97	30	0	-0.0109189	0	9	636211	-0.16	20.6
05-05-2021 11:06:39	17.4325	0	4.96	30	0	-0.0109189	0	9	636211	-0.16	20.6
05-05-2021 11:07:39	17.4492	0	4.96	30	0	-0.0109189	0	9	636211	-0.16	20.6
05-05-2021 11:08:39	17.4658	0	4.96	30	0	-0.0109189	0	9	636211	-0.16	20.6
05-05-2021 11:09:39	17.4825	0	4.95	30	0	-0.0109189	0	9	636211	-0.16	20.6
05-05-2021 11:10:39	17.4992	0	4.95	30	0	-0.0109189	0	9	636211	-0.16	20.6
05-05-2021 11:11:39	17.5158	0	5.02	30	0	-0.0109189	0	10.1	636211	-0.16	20.6
05-05-2021 11:12:39	17.5325	0	5.02	30	0	-0.0109189	0	10.1	636211	-0.16	20.6
05-05-2021 11:13:39	17.5492	0	5.02	30	0	-0.0109189	0	10.1	636211	-0.16	20.6
05-05-2021 11:14:39	17.5658	0	5.01	30	0	-0.0109189	0	10.1	636211	-0.16	20.6
05-05-2021 11:15:39	17.5825	0	5.01	30	0	-0.0109189	0	10.1	636211	-0.16	20.6
05-05-2021 11:16:39	17.5992	0	5.01	30	0	-0.0109189	0	10.1	636211	-0.16	20.6
05-05-2021 11:17:39	17.6158	0	5	30	0	-0.0109189	0	10.1	636211	-0.16	20.6
05-05-2021 11:18:39	17.6325	0	5	30	0	-0.0109189	0	10.1	636211	-0.16	20.6
05-05-2021 11:19:39	17.6492	0	5	30	0	-0.0109189	0	10.1	636211	-0.16	20.6
05-05-2021 11:20:39	17.6658	0	4.99	30	0	-0.0109189	0	10.1	636211	-0.16	20.6
05-05-2021 11:21:39	17.6825	0	4.99	30	0	-0.0109189	0	10.1	636211	-0.16	20.6
05-05-2021 11:22:39	17.6992	0	4.98	30	0	-0.0109189	0	10.1	636211	-0.16	20.6
05-05-2021 11:23:39	17.7158	0	4.98	30	0	-0.0109189	0	10.1	636211	-0.16	20.6
05-05-2021 11:24:39	17.7325	0	4.98	30	0	-0.0109189	0	10.1	636211	-0.16	20.6
05-05-2021 11:25:39	17.7492	0	4.97	30	0	-0.0109189	0	10.1	636211	-0.16	20.6
05-05-2021 11:26:39	17.7658	0	4.97	30	0	-0.0109189	0	10.1	636211	-0.16	20.6
05-05-2021 11:27:39	17.7825	0	4.97	30	0	-0.0109189	0	10.1	636211	-0.16	20.6
05-05-2021 11:28:39	17.7992	0	4.96	30	0	-0.0109189	0	10.1	636211	-0.16	20.6
05-05-2021 11:29:39	17.8158	0	4.96	30	0	-0.0109189	0	10.1	636211	-0.16	20.6
05-05-2021 11:30:39	17.8325	0	4.96	30	0	-0.0109189	0	10.1	636211	-0.16	20.6
05-05-2021 11:31:39	17.8492	0	4.95	30	0	-0.0109189	0	10.1	636211	-0.16	20.6
05-05-2021 11:32:39	17.8658	0	4.99	30	0	-0.0109189	0	10.6	636211	-0.16	20.6
05-05-2021 11:33:39	17.8825	0	4.98	30	0	-0.0109189	0	10.6	636211	-0.16	20.6
05-05-2021 11:34:39	17.8992	0	4.98	30	0	-0.0109189	0	10.6	636211	-0.16	20.6
05-05-2021 11:35:39	17.9158	0	4.97	30	0	-0.0109189	0	10.6	636211	-0.16	20.6
05-05-2021 11:36:39	17.9325	0	4.97	30	0	-0.0109189	0	10.6	636211	-0.16	20.6
05-05-2021 11:37:39	17.9492	0	4.97	30	0	-0.0109189	0	10.6	636211	-0.16	20.6
05-05-2021 11:38:39	17.9658	0	4.96	30	0	-0.0109189	0	10.6	636211	-0.16	20.6
05-05-2021 11:39:39	17.9825	0	4.96	30	0	-0.0109189	0	10.6	636211	-0.16	20.6
05-05-2021 11:40:39	17.9992	0	4.96	30	0	-0.0109189	0	10.6	636211	-0.16	20.6
05-05-2021 11:41:39	18.0158	0	4.95	30	0	-0.0109189	0	10.6	636211	-0.16	20.6
05-05-2021 11:42:39	18.0325	0	4.98	30	0	-0.0109189	0	11.1	636211	-0.16	20.6
05-05-2021 11:43:39	18.0492	0	4.98	30	0	-0.0109189	0	11.1	636211	-0.16	20.6
05-05-2021 11:44:39	18.0658	0	4.97	30	0	-0.0109189	0	11.1	636211	-0.16	20.6
05-05-2021 11:45:39	18.0825	0	4.97	30	0	-0.0109189	0	11.1	636211	-0.16	20.6
05-05-2021 11:46:39	18.0992	0	4.97	30	0	-0.0109189	0	11.1	636211	-0.16	20.6
05-05-2021 11:47:39	18.1158	0	4.96	30	0	-0.0109189	0	11.1	636211	-0.16	20.6
05-05-2021 11:48:39	18.1325	0	4.96	30	0	-0.0109189	0	11.1	636211	-0.16	20.6
05-05-2021 11:49:39	18.1492	0	4.96	30	0	-0.0109189	0	11.1	636211	-0.16	20.6
05-05-2021 11:50:39	18.1658	0	4.95	30	0	-0.0109189	0	11.1	636211	-0.16	20.6
05-05-2021 11:51:39	18.1825	0	4.99	30	0	-0.0109189	0	11.6	636211	-0.16	20.6
05-05-2021 11:52:39	18.1992	0	4.98	30	0	-0.0109189	0	11.6	636211	-0.16	20.6
05-05-2021 11:53:39	18.2158	0	4.98	30	0	-0.0109189	0	11.6	636211	-0.16	20.6
05-05-2021 11:54:39	18.2325	0	4.97	30	0	-0.0109189	0	11.6	636211	-0.16	20.6
05-05-2021 11:55:39	18.2492	0	4.97	30	0	-0.0109189	0	11.6	636211	-0.16	20.6
05-05-2021 11:56:39	18.2658	0	4.97	30	0	-0.0109189	0	11.6	636211	-0.16	20.6
05-05-2021 11:57:39	18.2825	0	4.96	30	0	-0.0109189	0	11.6	636211	-0.16	20.6
05-05-2021 11:58:39	18.2992	0	4.96	30	0	-0.0109189	0	11.6	636211	-0.16	20.6
05-05-2021 11:59:39	18.3158	0	4.95	30	0	-0.0109189	0	11.6	636211	-0.16	20.6
05-05-2021 12:00:39	18.3325	0	4.95	30	0	-0.0109189	0	11.6	636211	-0.16	20.6
05-05-2021 12:01:39	18.3492	0	4.99	30	0	-0.0109189	0	12.1	636211	-0.16	20.6
05-05-2021 12:02:39	18.3658	0	4.99	30	0	-0.0109189	0	12.1	636211	-0.16	20.6
05-05-2021 12:03:39	18.3825	0	4.98	30	0	-0.0109189	0	12.1	636211	-0.16	20.6
05-05-2021 12:04:39	18.3992	0	4.98	30	0	-0.0109189	0	12.1	636211	-0.16	20.6
05-05-2021 12:05:39	18.4158	0	4.98	30	0	-0.0109189	0	12.1	636211	-0.16	20.6
05-05-2021 12:06:39	18.4325	0	4.97	30	0	-0.0109189	0	12.1	636211	-0.16	20.6
05-05-2021 12:07:39	18.4492	0	4.97	30	0	-0.0109189	0	12.1	636211	-0.16	20.6
05-05-2021 12:08:39	18.4658	0	4.96	30	0	-0.0109189	0	12.1	636211	-0.16	20.6
05-05-2021 12:09:39	18.4825	0	4.96	30	0	-0.0109189	0	12.1	636211	-0.16	20.6
05-05-2021 12:10:39	18.4992	0	4.96	30	0	-0.0109189	0	12.1	636211	-0.16	20.6
05-05-2021 12:11:39	18.5158	0	4.95	30	0	-0.0109189	0	12.1	636211	-0.16	20.6
05-05-2021 12:12:39	18.5325	0	4.99	30	0	-0.0109189	0	12.6	636211	-0.16	20.6
05-05-2021 12:13:39	18.5492	0	4.98	30	0	-0.0109189	0	12.6	636211	-0.16	20.6
05-05-2021 12:14:39	18.5658	0	4.98	30	0	-0.0109189	0	12.6	636211	-0.16	20.6
05-05-2021 12:15:39	18.5825	0	4.98	30	0	-0.0109189	0	12.6	636211	-0.16	20.6
05-05-2021 12:16:39	18.5992	0	4.97	30	0	-0.0109189	0	12.6	636211	-0.16	20.6
05-05-2021 12:17:39	18.6158	0	4.97	30	0	-0.0109189	0	12.6	636211	-0.16	20.6
05-05-2021 12:18:39	18.6325	0	4.96	30	0	-0.0109189	0	12.6	636211	-0.16	20.6
05-05-2021 12:19:39	18.6492	0	4.96	30	0	-0.0109189	0	12.6	636211	-0.16	20.6
05-05-2021 12:20:39	18.6658	0	4.96	30	0	-0.0109189	0	12.6	636211	-0.16	20.6
05-05-2021 12:21:39	18.6825	0	4.95	30	0	-0.0109189	0	12.6	636211	-0.16	20.6
05-05-2021 12:22:39	18.6992	0	5.02	30	0	-0.0109189	0	13.7	636211	-0.16	20.6
05-05-2021 12:23:39	18.7158	0	5.02	30	0	-0.0109189	0	13.7	636211	-0.16	20.6
05-05-2021 12:24:39	18.7325	0	5.01	30	0	-0.0109189	0	13.7	636211	-0.16	20.6
05-05-2021 12:25:39	18.7492	0	5.01	30	0	-0.0109189	0	13.7	636211	-0.16	20.6
05-05-2021 12:26:39	18.7658	0	5	30	0	-0.0109189	0	13.7	636211	-0.16	20.6
05-05-2021 12:27:39	18.7825	0	5	30	0	-0.0109189	0	13.7	636211	-0.16	20.6
05-05-2021 12:28:39	18.7992	0	5	30	0	-0.0109189	0	13.7	636211	-0.16	20.6
05-05-2021 12:29:39	18.8158	0	4.99	30	0	-0.0109189	0	13.7	636211	-0.16	20.6
05-05-2021 12:30:39	18.8325	0	4.99	30	0	-0.0109189	0	13.7	636211	-0.16	20.6
05-05-2021 12:31:39	18.8492	0	4.98	30	0	-0.0109189	0	13.7	636211	-0.16	20.6
05-05-2021 12:32:39	18.8658	0	4.98	30	0	-0.0109189	0	13.7	636211	-0.16	20.6
05-05-2021 12:33:39	18.8825	0	4.98	30	0	-0.0109189	0	13.7	636211	-0.16	20.6
05-05-2021 12:34:39	18.8992	0	4.97	30	0	-0.0109189	0	13.7	636211	-0.16	20.6
05-05-2021 12:35:39	18.9158	0	4.97	30	0	-0.0109189	0	13.7	636211	-0.16	20.6
05-05-2021 12:36:39	18.9325	0	4.96	30	0	-0.0109189	0	13.7	636211	-0.16	20.6
05-05-2021 12:37:39	18.9492	0	4.96	30	0	-0.0109189	0	13.7	636211	-0.16	20.6
05-05-2021 12:38:39	18.9658	0	4.95	30	0	-0.0109189	0	13.7	636211	-0.16	20.6
05-05-2021 12:39:39	18.9825	0	4.98	30	0	-0.0109189	0	14.2	636211	-0.16	20.6
05-05-2021 12:40:39	18.9992	0	4.98	30	0	-0.0109189	0	14.2	636211	-0.16	20.6
05-05-2021 12:41:39	19.0158	0	4.98	30	0	-0.0109189	0	14.2	636211	-0.16	20.6
05-05-2021 12:42:39	19.0325	0	4.97	30	0	-0.0109189	0	14.2	636211	-0.16	20.6
05-05-2021 12:43:39	19.0492	0	4.97	30	0	-0.0109189	0	14.2	636211	-0.16	20.6
05-05-2021 12:44:39	19.0658	0	4.97	30	0	-0.0109189	0	14.2	636211	-0.16	20.6
05-05-2021 12:45:39	19.0825	0	4.96	30	0	-0.0109189	0	14.2	636211	-0.16	20.6
05-05-2021 12:46:39	19.0992	0	4.96	30	0	-0.0109189	0	14.2	636211	-0.16	20.6
05-05-2021 12:47:39	19.1158	0	4.95	30	0	-0.0109189	0	14.2	636211	-0.16	20.6
05-05-2021 12:48:39	19.1325	0	4.98	30	0	-0.0109189	0	14.7	636211	-0.16	20.6
05-05-2021 12:49:39	19.1492	0	4.97	30	0	-0.0109189	0	14.7	636211	-0.16	20.6
05-05-2021 12:50:39	19.1658	0	4.97	30	0	-0.0109189	0	14.7	636211	-0.16	20.6
05-05-2021 12:51:39	19.1825	0	4.97	30	0	-0.0109189	0	14.7	636211	-0.16	20.6
05-05-2021 12:52:39	19.1992	0	4.96	30	0	-0.0109189	0	14.7	636211	-0.16	20.6
05-05-2021 12:53:39	19.2158	0	4.96	30	0	-0.0109189	0	14.7	636211	-0.16	20.6
05-05-2021 12:54:39	19.2325	0	4.95	30	0	-0.0109189	0	14.7	636211	-0.16	20.6
05-05-2021 12:55:39	19.2492	0	4.98	30	0	-0.0109189	0	15.2	636211	-0.16	20.6
05-05-2021 12:56:39	19.2658	0	4.98	30	0	-0.0109189	0	15.2	636211	-0.16	20.6
05-05-2021 12:57:39	19.2825	0	4.98	30	0	-0.0109189	0	15.2	636211	-0.16	20.6
05-05-2021 12:58:39	19.2992	0	4.97	30	0	-0.0109189	0	15.2	636211	-0.16	20.6
05-05-2021 12:59:39	19.3158	0	4.97	30	0	-0.0109189	0	15.2	636211	-0.16	20.6
05-05-2021 13:00:39	19.3325	0	4.96	30	0	-0.0109189	0	15.2	636211	-0.16	20.6
05-05-2021 13:01:39	19.3492	0	4.96	30	0	-0.0109189	0	15.2	636211	-0.16	20.6
05-05-2021 13:02:39	19.3658	0	4.95	30	0	-0.0109189	0	15.2	636211	-0.16	20.6
05-05-2021 13:03:39	19.3825	0	4.99	30	0	-0.0109189	0	15.7	636211	-0.16	20.6
05-05-2021 13:04:39	19.3992	0	4.99	30	0	-0.0109189	0	15.7	636211	-0.16	20.6
05-05-2021 13:05:39	19.4158	0	4.98	30	0	-0.0109189	0	15.7	636211	-0.16	20.6
05-05-2021 13:06:39	19.4325	0	4.98	30	0	-0.0109189	0	15.7	636211	-0.16	20.6
05-05-2021 13:07:39	19.4492	0	4.97	30	0	-0.0109189	0	15.7	636211	-0.16	20.6
05-05-2021 13:08:39	19.4658	0	4.97	30	0	-0.0109189	0	15.7	636211	-0.16	20.6
05-05-2021 13:09:39	19.4825	0	4.96	30	0	-0.0109189	0	15.7	636211	-0.16	20.6
05-05-2021 13:10:39	19.4992	0	4.96	30	0	-0.0109189	0	15.7	636211	-0.16	20.6
05-05-2021 13:11:39	19.5158	0	4.96	30	0	-0.0109189	0	15.7	636211	-0.16	20.6
05-05-2021 13:12:39	19.5325	0	4.95	30	0	-0.0109189	0	15.7	636211	-0.16	20.6
05-05-2021 13:13:39	19.5492	0	4.99	30	0	-0.0109189	0	16.2	636211	-0.16	20.6
05-05-2021 13:14:39	19.5658	0	4.98	30	0	-0.0109189	0	16.2	636211	-0.16	20.6
05-05-2021 13:15:39	19.5825	0	4.98	30	0	-0.0109189	0	16.2	636211	-0.16	20.6
05-05-2021 13:16:39	19.5992	0	4.98	30	0	-0.0109189	0	16.2	636211	-0.16	20.6
05-05-2021 13:17:39	19.6158	0	4.97	30	0	-0.0109189	0	16.2	636211	-0.16	20.6
05-05-2021 13:18:39	19.6325	0	4.97	30	0	-0.0109189	0	16.2	636211	-0.16	20.6
05-05-2021 13:19:39	19.6492	0	4.96	30	0	-0.0109189	0	16.2	636211	-0.16	20.6
05-05-2021 13:20:39	19.6658	0	4.96	30	0	-0.0109189	0	16.2	636211	-0.16	20.6
05-05-2021 13:21:39	19.6825	0	4.95	30	0	-0.0109189	0	16.2	636211	-0.16	20.6
05-05-2021 13:22:39	19.6992	0	4.99	30	0	-0.0109189	0	17.3	636211	-0.16	20.6
05-05-2021 13:23:39	19.7158	0	5.01	30	0	-0.0109189	0	17.3	636211	-0.16	20.6
05-05-2021 13:24:39	19.7325	0	5.01	30	0	-0.0109189	0	17.3	636211	-0.16	20.6
05-05-2021 13:25:39	19.7492	0	5	30	0	-0.0109189	0	17.3	636211	-0.16	20.6
05-05-2021 13:26:39	19.7658	0	5	30	0	-0.0109189	0	17.3	636211	-0.16	20.6
05-05-2021 13:27:39	19.7825	0	4.99	30	0	-0.0109189	0	17.3	636211	-0.16	20.6
05-05-2021 13:28:39	19.7992	0	4.99	30	0	-0.0109189	0	17.3	636211	-0.16	20.6
05-05-2021 13:29:39	19.8158	0	4.98	30	0	-0.0109189	0	17.3	636211	-0.16	20.6
05-05-2021 13:30:39	19.8325	0	4.98	30	0	-0.0109189	0	17.3	636211	-0.16	20.6
05-05-2021 13:31:39	19.8492	0	4.97	30	0	-0.0109189	0	17.3	636211	-0.16	20.6
05-05-2021 13:32:39	19.8658	0	4.97	30	0	-0.0109189	0	17.3	636211	-0.16	20.6
05-05-2021 13:33:39	19.8825	0	4.96	30	0	-0.0109189	0	17.3	636211	-0.16	20.6
05-05-2021 13:34:39	19.8992	0	4.96	30	0	-0.0109189	0	17.3	636211	-0.16	20.6
05-05-2021 13:35:39	19.9158	0	4.96	30	0	-0.0109189	0	17.3	636211	-0.16	20.6
05-05-2021 13:36:39	19.9325	0	4.95	30	0	-0.0109189	0	17.3	636211	-0.16	20.6
05-05-2021 13:37:39	19.9492	0	4.99	30	0	-0.0109189	0	17.8	636211	-0.16	20.6
05-05-2021 13:38:39	19.9658	0	4.98	30	0	-0.0109189	0	17.8	636211	-0.16	20.6
05-05-2021 13:39:39	19.9825	0	4.98	30	0	-0.0109189	0	17.8	636211	-0.16	20.6
05-05-2021 13:40:39	19.9992	0	4.97	30	0	-0.0109189	0	17.8	636211	-0.16	20.6
05-05-2021 13:41:39	20.0158	0	4.97	30	0	-0.0109189	0	17.8	636211	-0.16	20.6
05-05-2021 13:42:39	20.0325	0	4.96	30	0	-0.0109189	0	17.8	636211	-0.16	20.6
05-05-2021 13:43:39	20.0492	0	4.96	30	0	-0.0109189	0	17.8	636211	-0.16	20.6
05-05-2021 13:44:39	20.0658	0	4.95	30	0	-0.0109189	0	17.8	636211	-0.16	20.6
05-05-2021 13:45:39	20.0825	0	4.95	30	0	-0.0109189	0	17.8	636211	-0.16	20.6
05-05-2021 13:46:39	20.0992	0	4.98	30	0	-0.0109189	0	18.3	636211	-0.16	20.6
05-05-2021 13:47:39	20.1158	0	4.98	30	0	-0.0109189	0	18.3	636211	-0.16	20.6
05-05-2021 13:48:39	20.1325	0	4.97	30	0	-0.0109189	0	18.3	636211	-0.16	20.6
05-05-2021 13:49:39	20.1492	0	4.97	30	0	-0.0109189	0	18.3	636211	-0.16	20.6
05-05-2021 13:50:39	20.1658	0	4.96	30	0	-0.0109189	0	18.3	636211	-0.16	20.6
05-05-2021 13:51:39	20.1825	0	4.96	30	0	-0.0109189	0	18.3	636211	-0.16	20.6
05-05-2021 13:52:39	20.1992	0	4.95	30	0	-0.0109189	0	18.3	636211	-0.16	20.6
05-05-2021 13:53:39	20.2158	0	5.02	30	0	-0.0109189	0	19.4	636211	-0.16	20.6
05-05-2021 13:54:39	20.2325	0	5.02	30	0	-0.0109189	0	19.4	636211	-0.16	20.6
05-05-2021 13:55:39	20.2492	0	5.01	30	0	-0.0109189	0	19.4	636211	-0.16	20.6
05-05-2021 13:56:39	20.2658	0	5.01	30	0	-0.0109189	0	19.4	636211	-0.16	20.6
05-05-2021 13:57:39	20.2825	0	5	30	0	-0.0109189	0	19.4	636211	-0.16	20.6
05-05-2021 13:58:39	20.2992	0	5	30	0	-0.0109189	0	19.4	636211	-0.16	20.6
05-05-2021 13:59:39	20.3158	0	4.99	30	0	-0.0109189	0	19.4	636211	-0.16	20.6
05-05-2021 14:00:39	20.3325	0	4.99	30	0	-0.0109189	0	19.4	636211	-0.16	20.6
05-05-2021 14:01:39	20.3492	0	4.98	30	0	-0.0109189	0	19.4	636211	-0.16	20.6
05-05-2021 14:02:39	20.3658	0	4.98	30	0	-0.0109189	0	19.4	636211	-0.16	20.6
05-05-2021 14:03:39	20.3825	0	4.97	30	0	-0.0109189	0	19.4	636211	-0.16	20.6
05-05-2021 14:04:39	20.3992	0	4.96	30	0	-0.0109189	0	19.4	636211	-0.16	20.6
05-05-2021 14:05:39	20.4158	0	4.96	30	0	-0.0109189	0	19.4	636211	-0.16	20.6
05-05-2021 14:06:39	20.4325	0	4.95	30	0	-0.0109189	0	19.4	636211	-0.16	20.6
05-05-2021 14:07:39	20.4492	0	4.98	30	0	-0.0109189	0	19.9	636211	-0.16	20.6
05-05-2021 14:08:39	20.4658	0	4.98	30	0	-0.0109189	0	19.9	636211	-0.16	20.6
05-05-2021 14:09:39	20.4825	0	4.98	30	0	-0.0109189	0	19.9	636211	-0.16	20.6
05-05-2021 14:10:39	20.4992	0	4.97	30	0	-0.0109189	0	19.9	636211	-0.16	20.6
05-05-2021 14:11:39	20.5158	0	4.97	30	0	-0.0109189	0	19.9	636211	-0.16	20.6
05-05-2021 14:12:39	20.5325	0	4.96	30	0	-0.0109189	0	19.9	636211	-0.16	20.6
05-05-2021 14:13:39	20.5492	0	4.96	30	0	-0.0109189	0	19.9	636211	-0.16	20.6
05-05-2021 14:14:39	20.5658	0	4.95	30	0	-0.0109189	0	19.9	636211	-0.16	20.6
05-05-2021 14:15:39	20.5825	0	5.02	30	0	-0.0109189	0	21	636211	-0.16	20.6
05-05-2021 14:16:39	20.5992	0	5.01	30	0	-0.0109189	0	21	636211	-0.16	20.6
05-05-2021 14:17:39	20.6158	0	5.01	30	0	-0.0109189	0	21	636211	-0.16	20.6
05-05-2021 14:18:39	20.6325	0	5	30	0	-0.0109189	0	21	636211	-0.16	20.6
05-05-2021 14:19:39	20.6492	0	5	30	0	-0.0109189	0	21	636211	-0.16	20.6
05-05-2021 14:20:39	20.6658	0	4.99	30	0	-0.0109189	0	21	636211	-0.16	20.6
05-05-2021 14:21:39	20.6825	0	4.99	30	0	-0.0109189	0	21	636211	-0.16	20.6
05-05-2021 14:22:39	20.6992	0	4.98	30	0	-0.0109189	0	21	636211	-0.16	20.6
05-05-2021 14:23:39	20.7158	0	4.98	30	0	-0.0109189	0	21	636211	-0.16	20.6
05-05-2021 14:24:39	20.7325	0	4.97	30	0	-0.0109189	0	21	636211	-0.16	20.6
05-05-2021 14:25:39	20.7492	0	4.97	30	0	-0.0109189	0	21	636211	-0.16	20.6
05-05-2021 14:26:39	20.7658	0	4.96	30	0	-0.0109189	0	21	636211	-0.16	20.6
05-05-2021 14:27:39	20.7825	0	4.96	30	0	-0.0109189	0	21	636211	-0.16	20.6
05-05-2021 14:28:39	20.7992	0	4.95	30	0	-0.0109189	0	21	636211	-0.16	20.6
05-05-2021 14:29:39	20.8158	0	4.98	30	0	-0.0109189	0	21.5	636211	-0.16	20.6
05-05-2021 14:30:39	20.8325	0	4.98	30	0	-0.0109189	0	21.5	636211	-0.16	20.6
05-05-2021 14:31:39	20.8492	0	4.97	30	0	-0.0109189	0	21.5	636211	-0.16	20.6
05-05-2021 14:32:39	20.8658	0	4.97	30	0	-0.0109189	0	21.5	636211	-0.16	20.6
05-05-2021 14:33:39	20.8825	0	4.96	30	0	-0.0109189	0	21.5	636211	-0.16	20.6
05-05-2021 14:34:39	20.8992	0	4.96	30	0	-0.0109189	0	21.5	636211	-0.16	20.6
05-05-2021 14:35:39	20.9158	0	4.95	30	0	-0.0109189	0	21.5	636211	-0.16	20.6
05-05-2021 14:36:39	20.9325	0	4.98	30	0	-0.0109189	0	22	636211	-0.16	20.6
05-05-2021 14:37:39	20.9492	0	4.97	30	0	-0.0109189	0	22	636211	-0.16	20.6
05-05-2021 14:38:39	20.9658	0	4.97	30	0	-0.0109189	0	22	636211	-0.16	20.6
05-05-2021 14:39:39	20.9825	0	4.96	30	0	-0.0109189	0	22	636211	-0.16	20.6
05-05-2021 14:40:39	20.9992	0	4.96	30	0	-0.0109189	0	22	636211	-0.16	20.6
05-05-2021 14:41:39	21.0158	0	4.95	30	0	-0.0109189	0	22	636211	-0.16	20.6
05-05-2021 14:42:39	21.0325	0	4.98	30	0	-0.0109189	0	22.5	636211	-0.16	20.6
05-05-2021 14:43:39	21.0492	0	4.97	30	0	-0.0109189	0	22.5	636211	-0.16	20.6
05-05-2021 14:44:39	21.0658	0	4.97	30	0	-0.0109189	0	22.5	636211	-0.16	20.7
05-05-2021 14:45:39	21.0825	0	4.96	30	0	-0.0109189	0	22.5	636211	-0.16	20.7
05-05-2021 14:46:39	21.0992	0	4.95	30	0	-0.0109189	0	22.5	636211	-0.16	20.7
05-05-2021 14:47:39	21.1158	0	4.99	30	0	-0.0109189	0	23	636211	-0.16	20.7
05-05-2021 14:48:39	21.1325	0	4.98	30	0	-0.0109189	0	23	636211	-0.16	20.7
05-05-2021 14:49:39	21.1492	0	4.98	30	0	-0.0109189	0	23	636211	-0.16	20.7
05-05-2021 14:50:39	21.1658	0	4.97	30	0	-0.0109189	0	23	636211	-0.16	20.7
05-05-2021 14:51:39	21.1825	0	4.97	30	0	-0.0109189	0	23	636211	-0.16	20.7
05-05-2021 14:52:39	21.1992	0	4.96	30	0	-0.0109189	0	23	636211	-0.16	20.7
05-05-2021 14:53:39	21.2158	0	4.96	30	0	-0.0109189	0	23	636211	-0.16	20.7
05-05-2021 14:54:39	21.2325	0	4.95	30	0	-0.0109189	0	23	636211	-0.16	20.7
05-05-2021 14:55:39	21.2492	0	4.99	30	0	-0.0109189	0	23.5	636211	-0.16	20.7
05-05-2021 14:56:39	21.2658	0	4.98	30	0	-0.0109189	0	23.5	636211	-0.16	20.7
05-05-2021 14:57:39	21.2825	0	4.98	30	0	-0.0109189	0	23.5	636211	-0.16	20.7
05-05-2021 14:58:39	21.2992	0	4.97	30	0	-0.0109189	0	23.5	636211	-0.16	20.7
05-05-2021 14:59:39	21.3158	0	4.97	30	0	-0.0109189	0	23.5	636211	-0.16	20.7
05-05-2021 15:00:39	21.3325	0	4.96	30	0	-0.0109189	0	23.5	636211	-0.16	20.7
05-05-2021 15:01:39	21.3492	0	4.95	30	0	-0.0109189	0	23.5	636211	-0.16	20.6
05-05-2021 15:02:39	21.3658	0	4.95	30	0	-0.0109189	0	24	636211	-0.16	20.6
05-05-2021 15:03:39	21.3825	0	4.98	30	0	-0.0109189	0	24.6	636211	-0.16	20.6
05-05-2021 15:04:39	21.3992	0	4.98	30	0	-0.0109189	0	24.6	636211	-0.16	20.6
05-05-2021 15:05:39	21.4158	0	4.97	30	0	-0.0109189	0	24.6	636211	-0.16	20.6
05-05-2021 15:06:39	21.4325	0	4.97	30	0	-0.0109189	0	24.6	636211	-0.16	20.6
05-05-2021 15:07:39	21.4492	0	4.96	30	0	-0.0109189	0	24.6	636211	-0.16	20.6
05-05-2021 15:08:39	21.4658	0	4.95	30	0	-0.0109189	0	24.6	636211	-0.16	20.6
05-05-2021 15:09:39	21.4825	0	5.02	30	0	-0.0109189	0	25.1	636211	-0.16	20.6
05-05-2021 15:10:39	21.4992	0	5.01	30	0	-0.0109189	0	25.1	636211	-0.16	20.6
05-05-2021 15:11:39	21.5158	0	5.01	30	0	-0.0109189	0	25.1	636211	-0.16	20.6
05-05-2021 15:12:39	21.5325	0	5	30	0	-0.0109189	0	25.1	636211	-0.16	20.6
05-05-2021 15:13:39	21.5492	0	4.99	30	0	-0.0109189	0	25.1	636211	-0.16	20.6
05-05-2021 15:14:39	21.5658	0	4.99	30	0	-0.0109189	0	25.1	636211	-0.16	20.6
05-05-2021 15:15:39	21.5825	0	4.98	30	0	-0.0109189	0	25.1	636211	-0.16	20.6
05-05-2021 15:16:39	21.5992	0	4.98	30	0	-0.0109189	0	25.1	636211	-0.16	20.6
05-05-2021 15:17:39	21.6158	0	4.97	30	0	-0.0109189	0	25.1	636211	-0.16	20.6
05-05-2021 15:18:39	21.6325	0	4.96	30	0	-0.0109189	0	25.1	636211	-0.16	20.6
05-05-2021 15:19:39	21.6492	0	4.96	30	0	-0.0109189	0	25.1	636211	-0.16	20.6
05-05-2021 15:20:39	21.6658	0	4.95	30	0	-0.0109189	0	25.1	636211	-0.16	20.6
05-05-2021 15:21:39	21.6825	0	4.98	30	0	-0.0109189	0	25.6	636211	-0.16	20.6
05-05-2021 15:22:39	21.6992	0	4.97	30	0	-0.0109189	0	25.6	636211	-0.16	20.6
05-05-2021 15:23:39	21.7158	0	4.97	30	0	-0.0109189	0	25.6	636211	-0.16	20.6
05-05-2021 15:24:39	21.7325	0	4.96	30	0	-0.0109189	0	25.6	636211	-0.16	20.6
05-05-2021 15:25:39	21.7492	0	4.96	30	0	-0.0109189	0	25.6	636211	-0.16	20.6
05-05-2021 15:26:39	21.7658	0	4.95	30	0	-0.0109189	0	25.8	636211	-0.16	20.6
05-05-2021 15:27:39	21.7825	0	5.02	30	0	-0.0109189	0	26.7	636211	-0.16	20.6
05-05-2021 15:28:39	21.7992	0	5.01	30	0	-0.0109189	0	26.7	636211	-0.16	20.6
05-05-2021 15:29:39	21.8158	0	5	30	0	-0.0109189	0	26.7	636211	-0.16	20.6
05-05-2021 15:30:39	21.8325	0	5	30	0	-0.0109189	0	26.7	636211	-0.16	20.6
05-05-2021 15:31:39	21.8492	0	4.99	30	0	-0.0109189	0	26.7	636211	-0.16	20.6
05-05-2021 15:32:39	21.8658	0	4.99	30	0	-0.0109189	0	26.7	636211	-0.16	20.6
05-05-2021 15:33:39	21.8825	0	4.98	30	0	-0.0109189	0	26.7	636211	-0.16	20.6
05-05-2021 15:34:39	21.8992	0	4.97	30	0	-0.0109189	0	26.7	636211	-0.16	20.6
05-05-2021 15:35:39	21.9158	0	4.97	30	0	-0.0109189	0	26.7	636211	-0.16	20.6
05-05-2021 15:36:39	21.9325	0	4.96	30	0	-0.0109189	0	26.7	636211	-0.16	20.6
05-05-2021 15:37:39	21.9492	0	4.95	30	0	-0.0109189	0	26.7	636211	-0.16	20.6
05-05-2021 15:38:39	21.9658	0	4.98	30	0	-0.0109189	0	27.2	636211	-0.16	20.6
05-05-2021 15:39:39	21.9825	0	4.98	30	0	-0.0109189	0	27.2	636211	-0.16	20.6
05-05-2021 15:40:39	21.9992	0	4.97	30	0	-0.0109189	0	27.2	636211	-0.16	20.6
05-05-2021 15:41:39	22.0158	0	4.97	30	0	-0.0109189	0	27.2	636211	-0.16	20.6
05-05-2021 15:42:39	22.0325	0	4.96	30	0	-0.0109189	0	27.2	636211	-0.16	20.6
05-05-2021 15:43:39	22.0492	0	4.95	30	0	-0.0109189	0	27.2	636211	-0.16	20.6
05-05-2021 15:44:39	22.0658	0	4.95	30	0	-0.0109189	0	27.7	636211	-0.16	20.6
05-05-2021 15:45:39	22.0825	0	5.01	30	0	-0.0109189	0	28.3	636211	-0.16	20.6
05-05-2021 15:46:39	22.0992	0	5.01	30	0	-0.0109189	0	28.3	636211	-0.16	20.6
05-05-2021 15:47:39	22.1158	0	5	30	0	-0.0109189	0	28.3	636211	-0.16	20.6
05-05-2021 15:48:39	22.1325	0	5	30	0	-0.0109189	0	28.3	636211	-0.16	20.6
05-05-2021 15:49:39	22.1492	0	4.99	30	0	-0.0109189	0	28.3	636211	-0.16	20.6
05-05-2021 15:50:39	22.1658	0	4.98	30	0	-0.0109189	0	28.3	636211	-0.16	20.6
05-05-2021 15:51:39	22.1825	0	4.98	30	0	-0.0109189	0	28.3	636211	-0.16	20.6
05-05-2021 15:52:39	22.1992	0	4.97	30	0	-0.0109189	0	28.3	636211	-0.16	20.6
05-05-2021 15:53:39	22.2158	0	4.96	30	0	-0.0109189	0	28.3	636211	-0.16	20.6
05-05-2021 15:54:39	22.2325	0	4.96	30	0	-0.0109189	0	28.3	636211	-0.16	20.6
05-05-2021 15:55:39	22.2492	0	4.95	30	0	-0.0109189	0	28.3	636211	-0.16	20.6
05-05-2021 15:56:39	22.2658	0	4.99	30	0	-0.0109189	0	28.8	636211	-0.16	20.6
05-05-2021 15:57:39	22.2825	0	4.98	30	0	-0.0109189	0	28.8	636211	-0.16	20.6
05-05-2021 15:58:39	22.2992	0	4.97	30	0	-0.0109189	0	28.8	636211	-0.16	20.6
05-05-2021 15:59:39	22.3158	0	4.97	30	0	-0.0109189	0	28.8	636211	-0.16	20.6
05-05-2021 16:00:39	22.3325	0	4.96	30	0	-0.0109189	0	28.8	636211	-0.16	20.6
05-05-2021 16:01:39	22.3492	0	4.95	30	0	-0.0109189	0	28.8	636211	-0.16	20.6
05-05-2021 16:02:39	22.3658	0	4.98	30	0	-0.0109189	0	29.3	636211	-0.16	20.6
05-05-2021 16:03:39	22.3825	0	4.98	30	0	-0.0109189	0	29.3	636211	-0.16	20.6
05-05-2021 16:04:39	22.3992	0	4.97	30	0	-0.0109189	0	29.3	636211	-0.16	20.6
05-05-2021 16:05:39	22.4158	0	4.96	30	0	-0.0109189	0	29.3	636211	-0.16	20.6
05-05-2021 16:06:39	22.4325	0	4.96	30	0	-0.0109189	0	29.3	636211	-0.16	20.6
05-05-2021 16:07:39	22.4492	0	4.95	30	0	-0.0109189	0	29.5	636211	-0.16	20.6
05-05-2021 16:08:39	22.4658	0	5.02	30	0	-0.0109189	0	30.4	636211	-0.16	20.6
05-05-2021 16:09:39	22.4825	0	5.01	30	0	-0.0109189	0	30.4	636211	-0.16	20.6
05-05-2021 16:10:39	22.4992	0	5	30	0	-0.0109189	0	30.4	636211	-0.16	20.6
05-05-2021 16:11:39	22.5158	0	5	30	0	-0.0109189	0	30.4	636211	-0.16	20.7
05-05-2021 16:12:39	22.5325	0	4.99	30	0	-0.0109189	0	30.4	636211	-0.16	20.7
05-05-2021 16:13:39	22.5492	0	4.98	30	0	-0.0109189	0	30.4	636211	-0.16	20.7
05-05-2021 16:14:39	22.5658	0	4.98	30	0	-0.0109189	0	30.4	636211	-0.16	20.7
05-05-2021 16:15:39	22.5825	0	4.97	30	0	-0.0109189	0	30.4	636211	-0.16	20.7
05-05-2021 16:16:39	22.5992	0	4.96	30	0	-0.0109189	0	30.4	636211	-0.16	20.7
05-05-2021 16:17:39	22.6158	0	4.96	30	0	-0.0109189	0	30.4	636211	-0.16	20.7
05-05-2021 16:18:39	22.6325	0	4.95	30	0	-0.0109189	0	30.6	636211	-0.16	20.7
05-05-2021 16:19:39	22.6492	0	4.98	30	0	-0.0109189	0	30.9	636211	-0.16	20.7
05-05-2021 16:20:39	22.6658	0	4.97	30	0	-0.0109189	0	30.9	636211	-0.16	20.7
05-05-2021 16:21:39	22.6825	0	4.97	30	0	-0.0109189	0	30.9	636211	-0.16	20.7
05-05-2021 16:22:39	22.6992	0	4.96	30	0	-0.0109189	0	30.9	636211	-0.16	20.7
05-05-2021 16:23:39	22.7158	0	4.95	30	0	-0.0109189	0	30.9	636211	-0.16	20.7
05-05-2021 16:24:39	22.7325	0	4.98	30	0	-0.0109189	0	32	636211	-0.16	20.7
05-05-2021 16:25:39	22.7492	0	5.01	30	0	-0.0109189	0	32	636211	-0.16	20.7
05-05-2021 16:26:39	22.7658	0	5.01	30	0	-0.0109189	0	32	636211	-0.16	20.7
05-05-2021 16:27:39	22.7825	0	5	30	0	-0.0109189	0	32	636211	-0.16	20.7
05-05-2021 16:28:39	22.7992	0	4.99	30	0	-0.0109189	0	32	636211	-0.16	20.7
05-05-2021 16:29:39	22.8158	0	4.99	30	0	-0.0109189	0	32	636211	-0.16	20.7
05-05-2021 16:30:39	22.8325	0	4.98	30	0	-0.0109189	0	32	636211	-0.16	20.7
05-05-2021 16:31:39	22.8492	0	4.97	30	0	-0.0109189	0	32	636211	-0.16	20.7
05-05-2021 16:32:39	22.8658	0	4.96	30	0	-0.0109189	0	32	636211	-0.16	20.7
05-05-2021 16:33:39	22.8825	0	4.96	30	0	-0.0109189	0	32	636211	-0.16	20.7
05-05-2021 16:34:39	22.8992	0	4.95	30	0	-0.0109189	0	32	636211	-0.16	20.7
05-05-2021 16:35:39	22.9158	0	4.99	30	0	-0.0109189	0	32.5	636211	-0.16	20.7
05-05-2021 16:36:39	22.9325	0	4.98	30	0	-0.0109189	0	32.5	636211	-0.16	20.7
05-05-2021 16:37:39	22.9492	0	4.97	30	0	-0.0109189	0	32.5	636211	-0.16	20.7
05-05-2021 16:38:39	22.9658	0	4.96	30	0	-0.0109189	0	32.5	636211	-0.16	20.7
05-05-2021 16:39:39	22.9825	0	4.96	30	0	-0.0109189	0	32.5	636211	-0.16	20.7
05-05-2021 16:40:39	22.9992	0	4.95	30	0	-0.0109189	0	32.5	636211	-0.16	20.7
05-05-2021 16:41:39	23.0158	0	4.98	30	0	-0.0109189	0	33	636211	-0.16	20.7
05-05-2021 16:42:39	23.0325	0	4.97	30	0	-0.0109189	0	33	636211	-0.16	20.7
05-05-2021 16:43:39	23.0492	0	4.96	30	0	-0.0109189	0	33	636211	-0.16	20.7
05-05-2021 16:44:39	23.0658	0	4.96	30	0	-0.0109189	0	33	636211	-0.16	20.7
05-05-2021 16:45:39	23.0825	0	4.95	30	0	-0.0109189	0	33.2	636211	-0.16	20.7
05-05-2021 16:46:39	23.0992	0	5.02	30	0	-0.0109189	0	34.1	636211	-0.16	20.7
05-05-2021 16:47:39	23.1158	0	5.01	30	0	-0.0109189	0	34.1	636211	-0.16	20.7
05-05-2021 16:48:39	23.1325	0	5.01	30	0	-0.0109189	0	34.1	636211	-0.16	20.7
05-05-2021 16:49:39	23.1492	0	5	30	0	-0.0109189	0	34.1	636211	-0.16	20.7
05-05-2021 16:50:39	23.1658	0	4.99	30	0	-0.0109189	0	34.1	636211	-0.16	20.7
05-05-2021 16:51:39	23.1825	0	4.98	30	0	-0.0109189	0	34.1	636211	-0.16	20.7
05-05-2021 16:52:39	23.1992	0	4.98	30	0	-0.0109189	0	34.1	636211	-0.16	20.7
05-05-2021 16:53:39	23.2158	0	4.97	30	0	-0.0109189	0	34.1	636211	-0.16	20.7
05-05-2021 16:54:39	23.2325	0	4.96	30	0	-0.0109189	0	34.1	636211	-0.16	20.7
05-05-2021 16:55:39	23.2492	0	4.96	30	0	-0.0109189	0	34.1	636211	-0.16	20.7
05-05-2021 16:56:39	23.2658	0	4.99	30	0	-0.0109189	0	34.6	636211	-0.16	20.7
05-05-2021 16:57:39	23.2825	0	4.98	30	0	-0.0109189	0	34.6	636211	-0.16	20.7
05-05-2021 16:58:39	23.2992	0	4.97	30	0	-0.0109189	0	34.6	636211	-0.16	20.7
05-05-2021 16:59:39	23.3158	0	4.97	30	0	-0.0109189	0	34.6	636211	-0.16	20.7
05-05-2021 17:00:39	23.3325	0	4.96	30	0	-0.0109189	0	34.6	636211	-0.16	20.7
05-05-2021 17:01:39	23.3492	0	4.95	30	0	-0.0109189	0	34.6	636211	-0.16	20.7
05-05-2021 17:02:39	23.3658	0	4.99	30	0	-0.0109189	0	35.7	636211	-0.16	20.7
05-05-2021 17:03:39	23.3825	0	5.01	30	0	-0.0109189	0	35.7	636211	-0.16	20.7
05-05-2021 17:04:39	23.3992	0	5	30	0	-0.0109189	0	35.7	636211	-0.16	20.7
05-05-2021 17:05:39	23.4158	0	4.99	30	0	-0.0109189	0	35.7	636211	-0.16	20.7
05-05-2021 17:06:39	23.4325	0	4.98	30	0	-0.0109189	0	35.7	636211	-0.16	20.7
05-05-2021 17:07:39	23.4492	0	4.98	30	0	-0.0109189	0	35.7	636211	-0.16	20.7
05-05-2021 17:08:39	23.4658	0	4.97	30	0	-0.0109189	0	35.7	636211	-0.16	20.7
05-05-2021 17:09:39	23.4825	0	4.96	30	0	-0.0109189	0	35.7	636211	-0.16	20.7
05-05-2021 17:10:39	23.4992	0	4.96	30	0	-0.0109189	0	35.7	636211	-0.16	20.7
05-05-2021 17:11:39	23.5158	0	4.98	30	0	-0.0109189	0	36.2	636211	-0.16	20.7
05-05-2021 17:12:39	23.5325	0	4.98	30	0	-0.0109189	0	36.2	636211	-0.16	20.7
05-05-2021 17:13:39	23.5492	0	4.97	30	0	-0.0109189	0	36.2	636211	-0.16	20.7
05-05-2021 17:14:39	23.5658	0	4.96	30	0	-0.0109189	0	36.2	636211	-0.16	20.7
05-05-2021 17:15:39	23.5825	0	4.96	30	0	-0.0109189	0	36.2	636211	-0.16	20.7
05-05-2021 17:16:39	23.5992	0	4.95	30	0	-0.0109189	0	36.4	636211	-0.16	20.7
05-05-2021 17:17:39	23.6158	0	4.98	30	0	-0.0109189	0	36.7	636211	-0.16	20.7
05-05-2021 17:18:39	23.6325	0	4.97	30	0	-0.0109189	0	36.7	636211	-0.16	20.7
05-05-2021 17:19:39	23.6492	0	4.96	30	0	-0.0109189	0	36.7	636211	-0.16	20.7
05-05-2021 17:20:39	23.6658	0	4.95	30	0	-0.0109189	0	36.7	636211	-0.16	20.7
05-05-2021 17:21:39	23.6825	0	5.01	30	0	-0.0109189	0	37.8	636211	-0.16	20.7
05-05-2021 17:22:39	23.6992	0	5	30	0	-0.0109189	0	37.8	636211	-0.16	20.7
05-05-2021 17:23:39	23.7158	0	5	30	0	-0.0109189	0	37.8	636211	-0.16	20.7
05-05-2021 17:24:39	23.7325	0	4.99	30	0	-0.0109189	0	37.8	636211	-0.16	20.7
05-05-2021 17:25:39	23.7492	0	4.98	30	0	-0.0109189	0	37.8	636211	-0.16	20.7
05-05-2021 17:26:39	23.7658	0	4.97	30	0	-0.0109189	0	37.8	636211	-0.16	20.7
05-05-2021 17:27:39	23.7825	0	4.97	30	0	-0.0109189	0	37.8	636211	-0.16	20.7
05-05-2021 17:28:39	23.7992	0	4.96	30	0	-0.0109189	0	37.8	636211	-0.16	20.7
05-05-2021 17:29:39	23.8158	0	4.95	30	0	-0.0109189	0	37.8	636211	-0.16	20.7
05-05-2021 17:30:39	23.8325	0	5	30	0	-0.0109189	0	38.3	636211	-0.16	20.7
05-05-2021 17:31:39	23.8492	0	4.99	30	0	-0.0109189	0	38.3	636211	-0.16	20.7
05-05-2021 17:32:39	23.8658	0	4.99	30	0	-0.0109189	0	38.3	636211	-0.16	20.7
05-05-2021 17:33:39	23.8825	0	4.98	30	0	-0.0109189	0	38.3	636211	-0.16	20.7
05-05-2021 17:34:39	23.8992	0	4.97	30	0	-0.0109189	0	38.3	636211	-0.16	20.7
05-05-2021 17:35:39	23.9158	0	4.96	30	0	-0.0109189	0	38.3	636211	-0.16	20.7
05-05-2021 17:36:39	23.9325	0	4.96	30	0	-0.0109189	0	38.3	636211	-0.16	20.7
05-05-2021 17:37:39	23.9492	0	4.95	30	0	-0.0109189	0	38.5	636211	-0.16	20.7
05-05-2021 17:38:39	23.9658	0	5	30	0	-0.0109189	0	39.4	636211	-0.16	20.7
05-05-2021 17:39:39	23.9825	0	5	30	0	-0.0109189	0	39.4	636211	-0.16	20.7
05-05-2021 17:40:39	23.9992	0	4.99	30	0	-0.0109189	0	39.4	636211	-0.16	20.7
05-05-2021 17:41:39	24.0158	0	4.98	30	0	-0.0109189	0	39.4	636211	-0.16	20.7
05-05-2021 17:42:39	24.0325	0	4.97	30	0	-0.0109189	0	39.4	636211	-0.16	20.7
05-05-2021 17:43:39	24.0492	0	4.97	30	0	-0.0109189	0	39.4	636211	-0.16	20.7
05-05-2021 17:44:39	24.0658	0	4.96	30	0	-0.0109189	0	39.4	636211	-0.16	20.7
05-05-2021 17:45:39	24.0825	0	4.95	30	0	-0.0109189	0	39.4	636211	-0.16	20.7
05-05-2021 17:46:39	24.0992	0	4.98	30	0	-0.0109189	0	39.9	636211	-0.16	20.7
05-05-2021 17:47:39	24.1158	0	4.97	30	0	-0.0109189	0	39.9	636211	-0.16	20.7
05-05-2021 17:48:39	24.1325	0	4.96	30	0	-0.0109189	0	39.9	636211	-0.16	20.7
05-05-2021 17:49:39	24.1492	0	4.95	30	0	-0.0109189	0	39.9	636211	-0.16	20.7
05-05-2021 17:50:39	24.1658	0	4.97	30	0	-0.0109189	0	40.4	636211	-0.16	20.7
05-05-2021 17:51:39	24.1825	0	4.97	30	0	-0.0109189	0	40.4	636211	-0.16	20.7
05-05-2021 17:52:39	24.1992	0	4.96	30	0	-0.0109189	0	40.4	636211	-0.16	20.7
05-05-2021 17:53:39	24.2158	0	4.95	30	0	-0.0109189	0	40.4	636211	-0.16	20.7
05-05-2021 17:54:39	24.2325	0	4.98	30	0	-0.0109189	0	40.9	636211	-0.16	20.7
05-05-2021 17:55:39	24.2492	0	4.97	30	0	-0.0109189	0	40.9	636211	-0.16	20.7
05-05-2021 17:56:39	24.2658	0	4.96	30	0	-0.0109189	0	40.9	636211	-0.16	20.7
05-05-2021 17:57:39	24.2825	0	4.96	30	0	-0.0109189	0	40.9	636211	-0.16	20.7
05-05-2021 17:58:39	24.2992	0	4.95	30	0	-0.0109189	0	41.1	636211	-0.16	20.7
05-05-2021 17:59:39	24.3158	0	4.98	30	0	-0.0109189	0	41.4	636211	-0.16	20.7
05-05-2021 18:00:39	24.3325	0	4.97	30	0	-0.0109189	0	41.4	636211	-0.16	20.7
05-05-2021 18:01:39	24.3492	0	4.96	30	0	-0.0109189	0	41.4	636211	-0.16	20.7
05-05-2021 18:02:39	24.3658	0	4.96	30	0	-0.0109189	0	41.4	636211	-0.16	20.7
05-05-2021 18:03:39	24.3825	0	4.95	30	0	-0.0109189	0	41.6	636211	-0.16	20.7
05-05-2021 18:04:39	24.3992	0	4.98	30	0	-0.0109189	0	41.9	636211	-0.16	20.7
05-05-2021 18:05:39	24.4158	0	4.97	30	0	-0.0109189	0	41.9	636211	-0.16	20.7
05-05-2021 18:06:39	24.4325	0	4.96	30	0	-0.0109189	0	41.9	636211	-0.16	20.7
05-05-2021 18:07:39	24.4492	0	4.95	30	0	-0.0109189	0	41.9	636211	-0.16	20.7
05-05-2021 18:08:39	24.4658	0	4.97	30	0	-0.0109189	0	42.4	636211	-0.16	20.7
05-05-2021 18:09:39	24.4825	0	4.96	30	0	-0.0109189	0	42.4	636211	-0.16	20.7
05-05-2021 18:10:39	24.4992	0	4.95	30	0	-0.0109189	0	42.4	636211	-0.16	20.7
05-05-2021 18:11:39	24.5158	0	4.98	30	0	-0.0109189	0	42.9	636211	-0.16	20.7
05-05-2021 18:12:39	24.5325	0	4.98	30	0	-0.0109189	0	42.9	636211	-0.16	20.7
05-05-2021 18:13:39	24.5492	0	4.97	30	0	-0.0109189	0	42.9	636211	-0.16	20.7
05-05-2021 18:14:39	24.5658	0	4.96	30	0	-0.0109189	0	42.9	636211	-0.16	20.7
05-05-2021 18:15:39	24.5825	0	4.95	30	0	-0.0109189	0	42.9	636211	-0.16	20.7
05-05-2021 18:16:39	24.5992	0	4.98	30	0	-0.0109189	0	43.4	636211	-0.16	20.7
05-05-2021 18:17:39	24.6158	0	4.97	30	0	-0.0109189	0	43.4	636211	-0.16	20.7
05-05-2021 18:18:39	24.6325	0	4.96	30	0	-0.0109189	0	43.4	636211	-0.16	20.7
05-05-2021 18:19:39	24.6492	0	4.96	30	0	-0.0109189	0	43.4	636211	-0.16	20.7
05-05-2021 18:20:39	24.6658	0	4.98	30	0	-0.0109189	0	43.9	636211	-0.16	20.7
05-05-2021 18:21:39	24.6825	0	4.98	30	0	-0.0109189	0	43.9	636211	-0.16	20.7
05-05-2021 18:22:39	24.6992	0	4.97	30	0	-0.0109189	0	43.9	636211	-0.16	20.7
05-05-2021 18:23:39	24.7158	0	4.96	30	0	-0.0109189	0	43.9	636211	-0.16	20.7
05-05-2021 18:24:39	24.7325	0	4.95	30	0	-0.0109189	0	43.9	636211	-0.16	20.7
05-05-2021 18:25:39	24.7492	0	5.02	29.9	0	-0.0109189	0	45	636211	-0.16	20.7
05-05-2021 18:26:39	24.7658	0	5.01	29.9	0	-0.0109189	0	45	636211	-0.16	20.7
05-05-2021 18:27:39	24.7825	0	5	30	0	-0.0109189	0	45	636211	-0.16	20.7
05-05-2021 18:28:39	24.7992	0	4.99	30	0	-0.0109189	0	45	636211	-0.16	20.7
05-05-2021 18:29:39	24.8158	0	4.99	30	0	-0.0109189	0	45	636211	-0.16	20.7
05-05-2021 18:30:39	24.8325	0	4.98	30	0	-0.0109189	0	45	636211	-0.16	20.7
05-05-2021 18:31:39	24.8492	0	4.97	30	0	-0.0109189	0	45	636211	-0.16	20.7
05-05-2021 18:32:39	24.8658	0	4.96	30	0	-0.0109189	0	45	636211	-0.16	20.7
05-05-2021 18:33:39	24.8825	0	4.95	30	0	-0.0109189	0	45	636211	-0.16	20.7
05-05-2021 18:34:39	24.8992	0	4.98	30	0	-0.0109189	0	45.5	636211	-0.16	20.7
05-05-2021 18:35:39	24.9158	0	4.98	30	0	-0.0109189	0	45.5	636211	-0.16	20.7
05-05-2021 18:36:39	24.9325	0	4.97	30	0	-0.0109189	0	45.5	636211	-0.16	20.7
05-05-2021 18:37:39	24.9492	0	4.96	30	0	-0.0109189	0	45.5	636211	-0.16	20.7
05-05-2021 18:38:39	24.9658	0	4.95	30	0	-0.0109189	0	45.5	636211	-0.16	20.7
05-05-2021 18:39:39	24.9825	0	5.01	30	0	-0.0109189	0	46.6	636211	-0.16	20.7
05-05-2021 18:40:39	24.9992	0	5	30	0	-0.0109189	0	46.6	636211	-0.16	20.7
05-05-2021 18:41:39	25.0158	0	5	30	0	-0.0109189	0	46.6	636211	-0.16	20.7
05-05-2021 18:42:39	25.0325	0	4.99	30	0	-0.0109189	0	46.6	636211	-0.16	20.7
05-05-2021 18:43:39	25.0492	0	4.98	30	0	-0.0109189	0	46.6	636211	-0.16	20.7
05-05-2021 18:44:39	25.0658	0	4.97	30	0	-0.0109189	0	46.6	636211	-0.16	20.7
05-05-2021 18:45:39	25.0825	0	4.96	30	0	-0.0109189	0	46.6	636211	-0.16	20.7
05-05-2021 18:46:39	25.0992	0	4.96	30	0	-0.0109189	0	46.6	636211	-0.16	20.7
05-05-2021 18:47:39	25.1158	0	4.99	30	0	-0.0109189	0	47.1	636211	-0.16	20.7
05-05-2021 18:48:39	25.1325	0	4.98	30	0	-0.0109189	0	47.1	636211	-0.16	20.7
05-05-2021 18:49:39	25.1492	0	4.97	30	0	-0.0109189	0	47.1	636211	-0.16	20.7
05-05-2021 18:50:39	25.1658	0	4.97	30	0	-0.0109189	0	47.1	636211	-0.16	20.7
05-05-2021 18:51:39	25.1825	0	4.96	30	0	-0.0109189	0	47.1	636211	-0.16	20.7
05-05-2021 18:52:39	25.1992	0	4.95	30	0	-0.0109189	0	47.3	636211	-0.16	20.7
05-05-2021 18:53:39	25.2158	0	4.98	30	0	-0.0109189	0	47.6	636211	-0.16	20.7
05-05-2021 18:54:39	25.2325	0	4.97	30	0	-0.0109189	0	47.6	636211	-0.16	20.7
05-05-2021 18:55:39	25.2492	0	4.96	30	0	-0.0109189	0	47.6	636211	-0.16	20.7
05-05-2021 18:56:39	25.2658	0	4.95	30	0	-0.0109189	0	47.6	636211	-0.16	20.7
05-05-2021 18:57:39	25.2825	0	5.01	30	0	-0.0109189	0	48.7	636211	-0.16	20.7
05-05-2021 18:58:39	25.2992	0	5	30	0	-0.0109189	0	48.7	636211	-0.16	20.7
05-05-2021 18:59:39	25.3158	0	4.99	30	0	-0.0109189	0	48.7	636211	-0.16	20.7
05-05-2021 19:00:39	25.3325	0	4.99	30	0	-0.0109189	0	48.7	636211	-0.16	20.7
05-05-2021 19:01:39	25.3492	0	4.98	30	0	-0.0109189	0	48.7	636211	-0.16	20.7
05-05-2021 19:02:39	25.3658	0	4.97	30	0	-0.0109189	0	48.7	636211	-0.16	20.7
05-05-2021 19:03:39	25.3825	0	4.96	30	0	-0.0109189	0	48.7	636211	-0.16	20.7
05-05-2021 19:04:39	25.3992	0	4.96	30	0	-0.0109189	0	48.7	636211	-0.16	20.7
05-05-2021 19:05:39	25.4158	0	4.98	30	0	-0.0109189	0	49.2	636211	-0.16	20.7
05-05-2021 19:06:39	25.4325	0	4.97	30	0	-0.0109189	0	49.2	636211	-0.16	20.7
05-05-2021 19:07:39	25.4492	0	4.96	30	0	-0.0109189	0	49.2	636211	-0.16	20.7
05-05-2021 19:08:39	25.4658	0	4.96	30	0	-0.0109189	0	49.2	636211	-0.16	20.7
05-05-2021 19:09:39	25.4825	0	4.97	30	0	-0.0109189	0	49.7	636211	-0.16	20.7
05-05-2021 19:10:39	25.4992	0	4.97	30	0	-0.0109189	0	49.7	636211	-0.16	20.7
05-05-2021 19:11:39	25.5158	0	4.96	30	0	-0.0109189	0	49.7	636211	-0.16	20.7
05-05-2021 19:12:39	25.5325	0	4.95	30	0	-0.0109189	0	49.7	636211	-0.16	20.7
05-05-2021 19:13:39	25.5492	0	4.98	30	0	-0.0109189	0	50.2	636211	-0.16	20.7
05-05-2021 19:14:39	25.5658	0	4.97	30	0	-0.0109189	0	50.2	636211	-0.16	20.7
05-05-2021 19:15:39	25.5825	0	4.96	30	0	-0.0109189	0	50.2	636211	-0.16	20.7
05-05-2021 19:16:39	25.5992	0	4.95	30	0	-0.0109189	0	50.2	636211	-0.16	20.7
05-05-2021 19:17:39	25.6158	0	4.98	30	0	-0.0109189	0	50.7	636211	-0.16	20.7
05-05-2021 19:18:39	25.6325	0	4.97	30	0	-0.0109189	0	50.7	636211	-0.16	20.7
05-05-2021 19:19:39	25.6492	0	4.97	30	0	-0.0109189	0	50.7	636211	-0.16	20.7
05-05-2021 19:20:39	25.6658	0	4.96	30	0	-0.0109189	0	50.7	636211	-0.16	20.7
05-05-2021 19:21:39	25.6825	0	4.95	30	0	-0.0109189	0	50.7	636211	-0.16	20.7
05-05-2021 19:22:39	25.6992	0	4.97	30	0	-0.0109189	0	51.2	636211	-0.16	20.7
05-05-2021 19:23:39	25.7158	0	4.97	30	0	-0.0109189	0	51.2	636211	-0.16	20.7
05-05-2021 19:24:39	25.7325	0	4.96	30	0	-0.0109189	0	51.2	636211	-0.16	20.7
05-05-2021 19:25:39	25.7492	0	4.95	30	0	-0.0109189	0	51.2	636211	-0.16	20.7
05-05-2021 19:26:39	25.7658	0	5	30	0	-0.0109189	0	52.3	636211	-0.16	20.7
05-05-2021 19:27:39	25.7825	0	5	30	0	-0.0109189	0	52.3	636211	-0.16	20.7
05-05-2021 19:28:39	25.7992	0	4.99	30	0	-0.0109189	0	52.3	636211	-0.16	20.7
05-05-2021 19:29:39	25.8158	0	4.98	30	0	-0.0109189	0	52.3	636211	-0.16	20.7
05-05-2021 19:30:39	25.8325	0	4.97	30	0	-0.0109189	0	52.3	636211	-0.16	20.7
05-05-2021 19:31:39	25.8492	0	4.96	30	0	-0.0109189	0	52.3	636211	-0.16	20.7
05-05-2021 19:32:39	25.8658	0	4.96	30	0	-0.0109189	0	52.3	636211	-0.16	20.7
05-05-2021 19:33:39	25.8825	0	5	30	0	-0.0109189	0	52.8	636211	-0.16	20.7
05-05-2021 19:34:39	25.8992	0	5	30	0	-0.0109189	0	52.8	636211	-0.16	20.7
05-05-2021 19:35:39	25.9158	0	4.99	30	0	-0.0109189	0	52.8	636211	-0.16	20.7
05-05-2021 19:36:39	25.9325	0	4.98	30	0	-0.0109189	0	52.8	636211	-0.16	20.7
05-05-2021 19:37:39	25.9492	0	4.97	30	0	-0.0109189	0	52.8	636211	-0.16	20.7
05-05-2021 19:38:39	25.9658	0	4.96	30	0	-0.0109189	0	52.8	636211	-0.16	20.7
05-05-2021 19:39:39	25.9825	0	4.96	30	0	-0.0109189	0	52.8	636211	-0.16	20.7
05-05-2021 19:40:39	25.9992	0	4.95	30	0	-0.0109189	0	53.6	636211	-0.16	20.7
05-05-2021 19:41:39	26.0158	0	5	30	0	-0.0109189	0	53.9	636211	-0.16	20.7
05-05-2021 19:42:39	26.0325	0	4.99	30	0	-0.0109189	0	53.9	636211	-0.16	20.7
05-05-2021 19:43:39	26.0492	0	4.99	30	0	-0.0109189	0	53.9	636211	-0.16	20.7
05-05-2021 19:44:39	26.0658	0	4.98	30	0	-0.0109189	0	53.9	636211	-0.16	20.7
05-05-2021 19:45:39	26.0825	0	4.97	30	0	-0.0109189	0	53.9	636211	-0.16	20.7
05-05-2021 19:46:39	26.0992	0	4.96	30	0	-0.0109189	0	53.9	636211	-0.16	20.7
05-05-2021 19:47:39	26.1158	0	4.95	30	0	-0.0109189	0	53.9	636211	-0.16	20.7
05-05-2021 19:48:39	26.1325	0	4.98	30	0	-0.0109189	0	54.4	636211	-0.16	20.7
05-05-2021 19:49:39	26.1492	0	4.97	30	0	-0.0109189	0	54.4	636211	-0.16	20.7
05-05-2021 19:50:39	26.1658	0	4.97	30	0	-0.0109189	0	54.4	636211	-0.16	20.7
05-05-2021 19:51:39	26.1825	0	4.96	30	0	-0.0109189	0	54.4	636211	-0.16	20.7
05-05-2021 19:52:39	26.1992	0	4.95	30	0	-0.0109189	0	54.6	636211	-0.16	20.7
05-05-2021 19:53:39	26.2158	0	4.97	30	0	-0.0109189	0	54.9	636211	-0.16	20.7
05-05-2021 19:54:39	26.2325	0	4.97	30	0	-0.0109189	0	54.9	636211	-0.16	20.7
05-05-2021 19:55:39	26.2492	0	4.96	30	0	-0.0109189	0	54.9	636211	-0.16	20.7
05-05-2021 19:56:39	26.2658	0	4.95	30	0	-0.0109189	0	55.1	636211	-0.16	20.7
05-05-2021 19:57:39	26.2825	0	4.97	30	0	-0.0109189	0	55.4	636211	-0.16	20.7
05-05-2021 19:58:39	26.2992	0	4.96	30	0	-0.0109189	0	55.4	636211	-0.16	20.7
05-05-2021 19:59:39	26.3158	0	4.95	30	0	-0.0109189	0	55.4	636211	-0.16	20.7
05-05-2021 20:00:39	26.3325	0	4.98	30	0	-0.0109189	0	55.9	636211	-0.16	20.7
05-05-2021 20:01:39	26.3492	0	4.97	30	0	-0.0109189	0	55.9	636211	-0.16	20.7
05-05-2021 20:02:39	26.3658	0	4.97	30	0	-0.0109189	0	55.9	636211	-0.16	20.7
05-05-2021 20:03:39	26.3825	0	4.96	30	0	-0.0109189	0	55.9	636211	-0.16	20.7
05-05-2021 20:04:39	26.3992	0	4.95	30	0	-0.0109189	0	55.9	636211	-0.16	20.7
05-05-2021 20:05:39	26.4158	0	4.98	30	0	-0.0109189	0	56.4	636211	-0.16	20.7
05-05-2021 20:06:39	26.4325	0	4.97	30	0	-0.0109189	0	56.4	636211	-0.16	20.7
05-05-2021 20:07:39	26.4492	0	4.96	30	0	-0.0109189	0	56.4	636211	-0.16	20.7
05-05-2021 20:08:39	26.4658	0	4.95	30	0	-0.0109189	0	56.4	636211	-0.16	20.7
05-05-2021 20:09:39	26.4825	0	4.97	30	0	-0.0109189	0	56.9	636211	-0.16	20.7
05-05-2021 20:10:39	26.4992	0	4.96	30	0	-0.0109189	0	56.9	636211	-0.16	20.7
05-05-2021 20:11:39	26.5158	0	4.96	30	0	-0.0109189	0	56.9	636211	-0.16	20.7
05-05-2021 20:12:39	26.5325	0	4.95	30	0	-0.0109189	0	57.1	636211	-0.16	20.7
05-05-2021 20:13:39	26.5492	0	4.97	30	0	-0.0109189	0	57.4	636211	-0.16	20.7
05-05-2021 20:14:39	26.5658	0	4.97	30	0	-0.0109189	0	57.4	636211	-0.16	20.7
05-05-2021 20:15:39	26.5825	0	4.96	30	0	-0.0109189	0	57.4	636211	-0.16	20.7
05-05-2021 20:16:39	26.5992	0	4.95	30	0	-0.0109189	0	57.4	636211	-0.16	20.7
05-05-2021 20:17:39	26.6158	0	4.98	30	0	-0.0109189	0	57.9	636211	-0.16	20.7
05-05-2021 20:18:39	26.6325	0	4.97	30	0	-0.0109189	0	57.9	636211	-0.16	20.7
05-05-2021 20:19:39	26.6492	0	4.96	30	0	-0.0109189	0	57.9	636211	-0.16	20.7
05-05-2021 20:20:39	26.6658	0	4.96	30	0	-0.0109189	0	57.9	636211	-0.16	20.7
05-05-2021 20:21:39	26.6825	0	4.98	30	0	-0.0109189	0	58.4	636211	-0.16	20.7
05-05-2021 20:22:39	26.6992	0	4.97	30	0	-0.0109189	0	58.4	636211	-0.16	20.7
05-05-2021 20:23:39	26.7158	0	4.96	30	0	-0.0109189	0	58.4	636211	-0.16	20.7
05-05-2021 20:24:39	26.7325	0	4.96	30	0	-0.0109189	0	58.4	636211	-0.16	20.7
05-05-2021 20:25:39	26.7492	0	4.95	30	0	-0.0109189	0	58.4	636211	-0.16	20.7
05-05-2021 20:26:39	26.7658	0	4.97	30	0	-0.0109189	0	58.9	636211	-0.16	20.7
05-05-2021 20:27:39	26.7825	0	4.96	30	0	-0.0109189	0	58.9	636211	-0.16	20.7
05-05-2021 20:28:39	26.7992	0	4.96	30	0	-0.0109189	0	58.9	636211	-0.16	20.7
05-05-2021 20:29:39	26.8158	0	4.95	30	0	-0.0109189	0	59.1	636211	-0.16	20.7
05-05-2021 20:30:39	26.8325	0	4.98	30	0	-0.0109189	0	59.4	636211	-0.16	20.7
05-05-2021 20:31:39	26.8492	0	4.97	30	0	-0.0109189	0	59.4	636211	-0.16	20.7
05-05-2021 20:32:39	26.8658	0	4.96	30	0	-0.0109189	0	59.4	636211	-0.16	20.7
05-05-2021 20:33:39	26.8825	0	4.96	30	0	-0.0109189	0	59.4	636211	-0.16	20.7
05-05-2021 20:34:39	26.8992	0	4.98	30	0	-0.0109189	0	59.9	636211	-0.16	20.7
05-05-2021 20:35:39	26.9158	0	4.97	30	0	-0.0109189	0	59.9	636211	-0.16	20.7
05-05-2021 20:36:39	26.9325	0	4.97	30	0	-0.0109189	0	59.9	636211	-0.16	20.7
05-05-2021 20:37:39	26.9492	0	4.96	30	0	-0.0109189	0	59.9	636211	-0.16	20.7
05-05-2021 20:38:39	26.9658	0	4.95	30	0	-0.0109189	0	59.9	636211	-0.16	20.7
05-05-2021 20:39:39	26.9825	0	4.97	30	0	-0.0109189	0	60.4	636211	-0.16	20.7
05-05-2021 20:40:39	26.9992	0	4.96	30	0	-0.0109189	0	60.4	636211	-0.16	20.7
05-05-2021 20:41:39	27.0158	0	4.98	30	0	-0.0109189	0	60.4	636211	-0.16	20.7
05-05-2021 20:42:39	27.0325	0	4.97	30	0	-0.0109189	0	60.4	636211	-0.16	20.7
05-05-2021 20:43:39	27.0492	0	4.97	30	0	-0.0109189	0	60.4	636211	-0.16	20.7
05-05-2021 20:44:39	27.0658	0	4.96	30	0	-0.0109189	0	60.4	636211	-0.16	20.7
05-05-2021 20:45:39	27.0825	0	4.95	30	0	-0.0109189	0	60.4	636211	-0.16	20.7
05-05-2021 20:46:39	27.0992	0	5	30	0	-0.0109189	0	61.5	636211	-0.16	20.7
05-05-2021 20:47:39	27.1158	0	5	30	0	-0.0109189	0	61.5	636211	-0.16	20.7
05-05-2021 20:48:39	27.1325	0	4.99	30	0	-0.0109189	0	61.5	636211	-0.16	20.7
05-05-2021 20:49:39	27.1492	0	4.98	30	0	-0.0109189	0	61.5	636211	-0.16	20.7
05-05-2021 20:50:39	27.1658	0	4.98	30	0	-0.0109189	0	61.5	636211	-0.16	20.7
05-05-2021 20:51:39	27.1825	0	4.97	30	0	-0.0109189	0	61.5	636211	-0.16	20.7
05-05-2021 20:52:39	27.1992	0	4.96	30	0	-0.0109189	0	61.5	636211	-0.16	20.7
05-05-2021 20:53:39	27.2158	0	4.96	30	0	-0.0109189	0	61.5	636211	-0.16	20.7
05-05-2021 20:54:39	27.2325	0	4.95	30	0	-0.0109189	0	61.7	636211	-0.16	20.7
05-05-2021 20:55:39	27.2492	0	4.97	30	0	-0.0109189	0	62	636211	-0.16	20.7
05-05-2021 20:56:39	27.2658	0	4.97	30	0	-0.0109189	0	62	636211	-0.16	20.7
05-05-2021 20:57:39	27.2825	0	4.96	30	0	-0.0109189	0	62	636211	-0.16	20.7
05-05-2021 20:58:39	27.2992	0	4.95	30	0	-0.0109189	0	62	636211	-0.16	20.7
05-05-2021 20:59:39	27.3158	0	4.97	30	0	-0.0109189	0	62.5	636211	-0.16	20.7
05-05-2021 21:00:39	27.3325	0	4.97	30	0	-0.0109189	0	62.5	636211	-0.16	20.7
05-05-2021 21:01:39	27.3492	0	4.96	30	0	-0.0109189	0	62.5	636211	-0.16	20.7
05-05-2021 21:02:39	27.3658	0	4.95	30	0	-0.0109189	0	62.5	636211	-0.16	20.7
05-05-2021 21:03:39	27.3825	0	4.98	30	0	-0.0109189	0	63	636211	-0.16	20.7
05-05-2021 21:04:39	27.3992	0	4.97	30	0	-0.0109189	0	63	636211	-0.16	20.7
05-05-2021 21:05:39	27.4158	0	4.97	30	0	-0.0109189	0	63	636211	-0.16	20.7
05-05-2021 21:06:39	27.4325	0	4.96	30	0	-0.0109189	0	63	636211	-0.16	20.7
05-05-2021 21:07:39	27.4492	0	4.96	30	0	-0.0109189	0	63	636211	-0.16	20.7
05-05-2021 21:08:39	27.4658	0	4.95	30	0	-0.0109189	0	63.2	636211	-0.16	20.7
05-05-2021 21:09:39	27.4825	0	4.98	30	0	-0.0109189	0	63.5	636211	-0.16	20.7
05-05-2021 21:10:39	27.4992	0	4.97	30	0	-0.0109189	0	63.5	636211	-0.16	20.7
05-05-2021 21:11:39	27.5158	0	4.97	30	0	-0.0109189	0	63.5	636211	-0.16	20.7
05-05-2021 21:12:39	27.5325	0	4.96	30	0	-0.0109189	0	63.5	636211	-0.16	20.7
05-05-2021 21:13:39	27.5492	0	4.95	30	0	-0.0109189	0	63.5	636211	-0.16	20.7
05-05-2021 21:14:39	27.5658	0	4.98	30	0	-0.0109189	0	64	636211	-0.16	20.7
05-05-2021 21:15:39	27.5825	0	4.97	30	0	-0.0109189	0	64	636211	-0.16	20.7
05-05-2021 21:16:39	27.5992	0	4.97	30	0	-0.0109189	0	64	636211	-0.16	20.7
05-05-2021 21:17:39	27.6158	0	4.96	30	0	-0.0109189	0	64	636211	-0.16	20.7
05-05-2021 21:18:39	27.6325	0	4.95	30	0	-0.0109189	0	64	636211	-0.16	20.7
05-05-2021 21:19:39	27.6492	0	4.97	30	0	-0.0109189	0	64.5	636211	-0.16	20.7
05-05-2021 21:20:39	27.6658	0	4.97	30	0	-0.0109189	0	64.5	636211	-0.16	20.7
05-05-2021 21:21:39	27.6825	0	4.96	30	0	-0.0109189	0	64.5	636211	-0.16	20.7
05-05-2021 21:22:39	27.6992	0	4.95	30	0	-0.0109189	0	64.5	636211	-0.16	20.7
05-05-2021 21:23:39	27.7158	0	4.98	30	0	-0.0109189	0	65	636211	-0.16	20.7
05-05-2021 21:24:39	27.7325	0	4.98	30	0	-0.0109189	0	65	636211	-0.16	20.7
05-05-2021 21:25:39	27.7492	0	4.97	30	0	-0.0109189	0	65	636211	-0.16	20.7
05-05-2021 21:26:39	27.7658	0	4.96	30	0	-0.0109189	0	65	636211	-0.16	20.7
05-05-2021 21:27:39	27.7825	0	4.96	30	0	-0.0109189	0	65	636211	-0.16	20.7
05-05-2021 21:28:39	27.7992	0	4.95	30	0	-0.0109189	0	65	636211	-0.16	20.7
05-05-2021 21:29:39	27.8158	0	4.97	30	0	-0.0109189	0	65.5	636211	-0.16	20.7
05-05-2021 21:30:39	27.8325	0	4.99	30	0	-0.0109189	0	65.5	636211	-0.16	20.7
05-05-2021 21:31:39	27.8492	0	4.98	30	0	-0.0109189	0	65.5	636211	-0.16	20.7
05-05-2021 21:32:39	27.8658	0	4.98	30	0	-0.0109189	0	65.5	636211	-0.16	20.7
05-05-2021 21:33:39	27.8825	0	4.97	30	0	-0.0109189	0	65.5	636211	-0.16	20.7
05-05-2021 21:34:39	27.8992	0	4.97	30	0	-0.0109189	0	65.5	636211	-0.16	20.7
05-05-2021 21:35:39	27.9158	0	4.96	30	0	-0.0109189	0	65.5	636211	-0.16	20.7
05-05-2021 21:36:39	27.9325	0	4.96	30	0	-0.0109189	0	65.5	636211	-0.16	20.7
05-05-2021 21:37:39	27.9492	0	4.95	30	0	-0.0109189	0	65.5	636211	-0.16	20.7
05-05-2021 21:38:39	27.9658	0	4.98	30	0	-0.0109189	0	66	636211	-0.16	20.7
05-05-2021 21:39:39	27.9825	0	4.97	30	0	-0.0109189	0	66	636211	-0.16	20.7
05-05-2021 21:40:39	27.9992	0	4.97	30	0	-0.0109189	0	66	636211	-0.16	20.7
05-05-2021 21:41:39	28.0158	0	4.96	30	0	-0.0109189	0	66	636211	-0.16	20.7
05-05-2021 21:42:39	28.0325	0	4.96	30	0	-0.0109189	0	66	636211	-0.16	20.7
05-05-2021 21:43:39	28.0492	0	4.95	30	0	-0.0109189	0	66	636211	-0.16	20.7
05-05-2021 21:44:39	28.0658	0	5.01	30	0	-0.0109189	0	67.1	636211	-0.16	20.7
05-05-2021 21:45:39	28.0825	0	5.01	30	0	-0.0109189	0	67.1	636211	-0.16	20.7
05-05-2021 21:46:39	28.0992	0	5	30	0	-0.0109189	0	67.1	636211	-0.16	20.7
05-05-2021 21:47:39	28.1158	0	5	30	0	-0.0109189	0	67.1	636211	-0.16	20.7
05-05-2021 21:48:39	28.1325	0	4.99	30	0	-0.0109189	0	67.1	636211	-0.16	20.7
05-05-2021 21:49:39	28.1492	0	4.99	30	0	-0.0109189	0	67.1	636211	-0.16	20.7
05-05-2021 21:50:39	28.1658	0	4.98	30	0	-0.0109189	0	67.1	636211	-0.16	20.7
05-05-2021 21:51:39	28.1825	0	4.98	30	0	-0.0109189	0	67.1	636211	-0.16	20.7
05-05-2021 21:52:39	28.1992	0	4.98	30	0	-0.0109189	0	67.1	636211	-0.16	20.7
05-05-2021 21:53:39	28.2158	0	4.97	30	0	-0.0109189	0	67.1	636211	-0.16	20.7
05-05-2021 21:54:39	28.2325	0	4.97	30	0	-0.0109189	0	67.1	636211	-0.16	20.7
05-05-2021 21:55:39	28.2492	0	4.96	30	0	-0.0109189	0	67.1	636211	-0.16	20.7
05-05-2021 21:56:39	28.2658	0	4.96	30	0	-0.0109189	0	67.1	636211	-0.16	20.7
05-05-2021 21:57:39	28.2825	0	4.95	30	0	-0.0109189	0	67.1	636211	-0.16	20.7
05-05-2021 21:58:39	28.2992	0	4.98	30	0	-0.0109189	0	67.6	636211	-0.16	20.7
05-05-2021 21:59:39	28.3158	0	4.98	30	0	-0.0109189	0	67.6	636211	-0.16	20.7
05-05-2021 22:00:39	28.3325	0	4.97	30	0	-0.0109189	0	67.6	636211	-0.16	20.7
05-05-2021 22:01:39	28.3492	0	4.97	30	0	-0.0109189	0	67.6	636211	-0.16	20.7
05-05-2021 22:02:39	28.3658	0	4.96	30	0	-0.0109189	0	67.6	636211	-0.16	20.7
05-05-2021 22:03:39	28.3825	0	4.96	30	0	-0.0109189	0	67.6	636211	-0.16	20.7
05-05-2021 22:04:39	28.3992	0	4.96	30	0	-0.0109189	0	67.6	636211	-0.16	20.7
05-05-2021 22:05:39	28.4158	0	4.95	30	0	-0.0109189	0	67.6	636211	-0.16	20.7
05-05-2021 22:06:39	28.4325	0	5.01	30	0	-0.0109189	0	68.7	636211	-0.16	20.7
05-05-2021 22:07:39	28.4492	0	5.01	30	0	-0.0109189	0	68.7	636211	-0.16	20.7
05-05-2021 22:08:39	28.4658	0	5	30	0	-0.0109189	0	68.7	636211	-0.16	20.7
05-05-2021 22:09:39	28.4825	0	5	30	0	-0.0109189	0	68.7	636211	-0.16	20.7
05-05-2021 22:10:39	28.4992	0	5	30	0	-0.0109189	0	68.7	636211	-0.16	20.7
05-05-2021 22:11:39	28.5158	0	4.99	30	0	-0.0109189	0	68.7	636211	-0.16	20.7
05-05-2021 22:12:39	28.5325	0	4.99	30	0	-0.0109189	0	68.7	636211	-0.16	20.7
05-05-2021 22:13:39	28.5492	0	4.99	30	0	-0.0109189	0	68.7	636211	-0.16	20.7
05-05-2021 22:14:39	28.5658	0	4.98	30	0	-0.0109189	0	68.7	636211	-0.16	20.7
05-05-2021 22:15:39	28.5825	0	4.98	30	0	-0.0109189	0	68.7	636211	-0.16	20.7
05-05-2021 22:16:39	28.5992	0	4.97	30	0	-0.0109189	0	68.7	636211	-0.16	20.7
05-05-2021 22:17:39	28.6158	0	4.97	30	0	-0.0109189	0	68.7	636211	-0.16	20.7
05-05-2021 22:18:39	28.6325	0	4.97	30	0	-0.0109189	0	68.7	636211	-0.16	20.7
05-05-2021 22:19:39	28.6492	0	4.96	30	0	-0.0109189	0	68.7	636211	-0.16	20.7
05-05-2021 22:20:39	28.6658	0	4.96	30	0	-0.0109189	0	68.7	636211	-0.16	20.7
05-05-2021 22:21:39	28.6825	0	4.95	30	0	-0.0109189	0	68.7	636211	-0.16	20.7
05-05-2021 22:22:39	28.6992	0	4.95	30	0	-0.0109189	0	68.7	636211	-0.16	20.7
05-05-2021 22:23:39	28.7158	0	4.98	30	0	-0.0109189	0	69.2	636211	-0.16	20.7
05-05-2021 22:24:39	28.7325	0	4.97	30	0	-0.0109189	0	69.2	636211	-0.16	20.7
05-05-2021 22:25:39	28.7492	0	4.97	30	0	-0.0109189	0	69.2	636211	-0.16	20.7
05-05-2021 22:26:39	28.7658	0	4.97	30	0	-0.0109189	0	69.2	636211	-0.16	20.7
05-05-2021 22:27:39	28.7825	0	4.96	30	0	-0.0109189	0	69.2	636211	-0.16	20.7
05-05-2021 22:28:39	28.7992	0	4.96	30	0	-0.0109189	0	69.2	636211	-0.16	20.7
05-05-2021 22:29:39	28.8158	0	4.96	30	0	-0.0109189	0	69.2	636211	-0.16	20.7
05-05-2021 22:30:39	28.8325	0	4.95	30	0	-0.0109189	0	69.2	636211	-0.16	20.7
05-05-2021 22:31:39	28.8492	0	4.95	30	0	-0.0109189	0	69.2	636211	-0.16	20.7
05-05-2021 22:32:39	28.8658	0	4.97	30	0	-0.0109189	0	69.7	636211	-0.16	20.7
05-05-2021 22:33:39	28.8825	0	4.97	30	0	-0.0109189	0	69.7	636211	-0.16	20.7
05-05-2021 22:34:39	28.8992	0	4.97	30	0	-0.0109189	0	69.7	636211	-0.16	20.7
05-05-2021 22:35:39	28.9158	0	4.96	30	0	-0.0109189	0	69.7	636211	-0.16	20.7
05-05-2021 22:36:39	28.9325	0	4.96	30	0	-0.0109189	0	69.7	636211	-0.16	20.7
05-05-2021 22:37:39	28.9492	0	4.96	30	0	-0.0109189	0	69.7	636211	-0.16	20.7
05-05-2021 22:38:39	28.9658	0	4.95	30	0	-0.0109189	0	69.7	636211	-0.16	20.7
05-05-2021 22:39:39	28.9825	0	4.95	30	0	-0.0109189	0	69.7	636211	-0.16	20.7
05-05-2021 22:40:39	28.9992	0	4.98	30	0	-0.0109189	0	70.2	636211	-0.16	20.7
05-05-2021 22:41:39	29.0158	0	4.98	30	0	-0.0109189	0	70.2	636211	-0.16	20.7
05-05-2021 22:42:39	29.0325	0	4.98	30	0	-0.0109189	0	70.2	636211	-0.16	20.7
05-05-2021 22:43:39	29.0492	0	4.97	30	0	-0.0109189	0	70.2	636211	-0.16	20.7
05-05-2021 22:44:39	29.0658	0	4.97	30	0	-0.0109189	0	70.2	636211	-0.16	20.7
05-05-2021 22:45:39	29.0825	0	4.97	30	0	-0.0109189	0	70.2	636211	-0.16	20.7
05-05-2021 22:46:39	29.0992	0	4.96	30	0	-0.0109189	0	70.2	636211	-0.16	20.7
05-05-2021 22:47:39	29.1158	0	4.96	30	0	-0.0109189	0	70.2	636211	-0.16	20.7
05-05-2021 22:48:39	29.1325	0	4.96	30	0	-0.0109189	0	70.2	636211	-0.16	20.7
05-05-2021 22:49:39	29.1492	0	4.96	30	0	-0.0109189	0	70.2	636211	-0.16	20.7
05-05-2021 22:50:39	29.1658	0	4.95	30	0	-0.0109189	0	70.2	636211	-0.16	20.7
05-05-2021 22:51:39	29.1825	0	4.95	30	0	-0.0109189	0	70.2	636211	-0.16	20.7
05-05-2021 22:52:39	29.1992	0	4.98	30	0	-0.0109189	0	70.7	636211	-0.16	20.7
05-05-2021 22:53:39	29.2158	0	4.98	30	0	-0.0109189	0	70.7	636211	-0.16	20.7
05-05-2021 22:54:39	29.2325	0	4.98	30	0	-0.0109189	0	70.7	636211	-0.16	20.7
05-05-2021 22:55:39	29.2492	0	4.97	30	0	-0.0109189	0	70.7	636211	-0.16	20.7
05-05-2021 22:56:39	29.2658	0	4.97	30	0	-0.0109189	0	70.7	636211	-0.16	20.7
05-05-2021 22:57:39	29.2825	0	4.97	30	0	-0.0109189	0	70.7	636211	-0.16	20.7
05-05-2021 22:58:39	29.2992	0	4.97	30	0	-0.0109189	0	70.7	636211	-0.16	20.7
05-05-2021 22:59:39	29.3158	0	4.96	30	0	-0.0109189	0	70.7	636211	-0.16	20.7
05-05-2021 23:00:39	29.3325	0	4.96	30	0	-0.0109189	0	70.7	636211	-0.16	20.7
05-05-2021 23:01:39	29.3492	0	4.96	30	0	-0.0109189	0	70.7	636211	-0.16	20.7
05-05-2021 23:02:39	29.3658	0	4.95	30	0	-0.0109189	0	70.7	636211	-0.16	20.7
05-05-2021 23:03:39	29.3825	0	4.95	30	0	-0.0109189	0	70.7	636211	-0.16	20.7
05-05-2021 23:04:39	29.3992	0	4.98	30	0	-0.0109189	0	71.2	636211	-0.16	20.7
05-05-2021 23:05:39	29.4158	0	4.98	30	0	-0.0109189	0	71.2	636211	-0.16	20.7
05-05-2021 23:06:39	29.4325	0	4.97	30	0	-0.0109189	0	71.2	636211	-0.16	20.7
05-05-2021 23:07:39	29.4492	0	4.97	30	0	-0.0109189	0	71.2	636211	-0.16	20.7
05-05-2021 23:08:39	29.4658	0	4.97	30	0	-0.0109189	0	71.2	636211	-0.16	20.7
05-05-2021 23:09:39	29.4825	0	4.97	30	0	-0.0109189	0	71.2	636211	-0.16	20.7
05-05-2021 23:10:39	29.4992	0	4.96	30	0	-0.0109189	0	71.2	636211	-0.16	20.7
05-05-2021 23:11:39	29.5158	0	4.96	30	0	-0.0109189	0	71.2	636211	-0.16	20.6
05-05-2021 23:12:39	29.5325	0	4.96	30	0	-0.0109189	0	71.2	636211	-0.16	20.7
05-05-2021 23:13:39	29.5492	0	4.96	30	0	-0.0109189	0	71.2	636211	-0.16	20.7
05-05-2021 23:14:39	29.5658	0	4.95	30	0	-0.0109189	0	71.2	636211	-0.16	20.7
05-05-2021 23:15:39	29.5825	0	4.95	30	0	-0.0109189	0	71.2	636211	-0.16	20.7
05-05-2021 23:16:39	29.5992	0	4.98	30	0	-0.0109189	0	71.4	636211	-0.16	20.7
05-05-2021 23:17:39	29.6158	0	4.98	30	0	-0.0109189	0	71.7	636211	-0.16	20.7
05-05-2021 23:18:39	29.6325	0	4.97	30	0	-0.0109189	0	71.7	636211	-0.16	20.7
05-05-2021 23:19:39	29.6492	0	4.97	30	0	-0.0109189	0	71.7	636211	-0.16	20.7
05-05-2021 23:20:39	29.6658	0	4.97	30	0	-0.0109189	0	71.7	636211	-0.16	20.7
05-05-2021 23:21:39	29.6825	0	4.97	30	0	-0.0109189	0	71.7	636211	-0.16	20.7
05-05-2021 23:22:39	29.6992	0	4.97	30	0	-0.0109189	0	71.7	636211	-0.16	20.7
05-05-2021 23:23:39	29.7158	0	4.96	30	0	-0.0109189	0	71.7	636211	-0.16	20.7
05-05-2021 23:24:39	29.7325	0	4.96	30	0	-0.0109189	0	71.7	636211	-0.16	20.7
05-05-2021 23:25:39	29.7492	0	4.96	30	0	-0.0109189	0	71.7	636211	-0.16	20.7
05-05-2021 23:26:39	29.7658	0	4.96	30	0	-0.0109189	0	71.7	636211	-0.16	20.7
05-05-2021 23:27:39	29.7825	0	4.96	30	0	-0.0109189	0	71.7	636211	-0.16	20.7
05-05-2021 23:28:39	29.7992	0	4.95	30	0	-0.0109189	0	71.7	636211	-0.16	20.7
05-05-2021 23:29:39	29.8158	0	4.95	30	0	-0.0109189	0	71.7	636211	-0.16	20.7
05-05-2021 23:30:39	29.8325	0	4.95	30	0	-0.0109189	0	71.9	636211	-0.16	20.7
05-05-2021 23:31:39	29.8492	0	4.98	30	0	-0.0109189	0	72.2	636211	-0.16	20.7
05-05-2021 23:32:39	29.8658	0	4.98	30	0	-0.0109189	0	72.2	636211	-0.16	20.7
05-05-2021 23:33:39	29.8825	0	4.98	30	0	-0.0109189	0	72.2	636211	-0.16	20.7
05-05-2021 23:34:39	29.8992	0	4.98	30	0	-0.0109189	0	72.2	636211	-0.16	20.7
05-05-2021 23:35:39	29.9158	0	4.97	30	0	-0.0109189	0	72.2	636211	-0.16	20.7
05-05-2021 23:36:39	29.9325	0	4.97	30	0	-0.0109189	0	72.2	636211	-0.16	20.7
05-05-2021 23:37:39	29.9492	0	4.97	30	0	-0.0109189	0	72.2	636211	-0.16	20.7
05-05-2021 23:38:39	29.9658	0	4.97	30	0	-0.0109189	0	72.2	636211	-0.16	20.7
05-05-2021 23:39:39	29.9825	0	4.97	30	0	-0.0109189	0	72.2	636211	-0.16	20.7
05-05-2021 23:40:39	29.9992	0	4.97	30	0	-0.0109189	0	72.2	636211	-0.16	20.7
05-05-2021 23:41:39	30.0158	0	4.96	30	0	-0.0109189	0	72.2	636211	-0.16	20.7
05-05-2021 23:42:39	30.0325	0	4.96	30	0	-0.0109189	0	72.2	636211	-0.16	20.7
05-05-2021 23:43:39	30.0492	0	4.96	30	0	-0.0109189	0	72.2	636211	-0.16	20.7
05-05-2021 23:44:39	30.0658	0	4.96	30	0	-0.0109189	0	72.2	636211	-0.16	20.7
05-05-2021 23:45:39	30.0825	0	4.96	30	0	-0.0109189	0	72.2	636211	-0.16	20.7
05-05-2021 23:46:39	30.0992	0	4.96	30	0	-0.0109189	0	72.2	636211	-0.16	20.7
05-05-2021 23:47:39	30.1158	0	4.95	30	0	-0.0109189	0	72.2	636211	-0.16	20.7
05-05-2021 23:48:39	30.1325	0	4.95	30	0	-0.0109189	0	72.2	636211	-0.16	20.7
05-05-2021 23:49:39	30.1492	0	4.95	30	0	-0.0109189	0	72.2	636211	-0.16	20.7
05-05-2021 23:50:39	30.1658	0	4.98	30	0	-0.0109189	0	72.7	636211	-0.16	20.7
05-05-2021 23:51:39	30.1825	0	4.98	30	0	-0.0109189	0	72.7	636211	-0.16	20.7
05-05-2021 23:52:39	30.1992	0	4.98	30	0	-0.0109189	0	72.7	636211	-0.16	20.7
05-05-2021 23:53:39	30.2158	0	4.97	30	0	-0.0109189	0	72.7	636211	-0.16	20.7
05-05-2021 23:54:39	30.2325	0	4.97	30	0	-0.0109189	0	72.7	636211	-0.16	20.7
05-05-2021 23:55:39	30.2492	0	4.97	30	0	-0.0109189	0	72.7	636211	-0.16	20.7
05-05-2021 23:56:39	30.2658	0	4.97	30	0	-0.0109189	0	72.7	636211	-0.16	20.7
05-05-2021 23:57:39	30.2825	0	4.97	30	0	-0.0109189	0	72.7	636211	-0.16	20.7
05-05-2021 23:58:39	30.2992	0	4.97	30	0	-0.0109189	0	72.7	636211	-0.16	20.7
05-05-2021 23:59:39	30.3158	0	4.97	30	0	-0.0109189	0	72.7	636211	-0.16	20.7
06-05-2021 00:00:39	30.3325	0	4.96	30	0	-0.0109189	0	72.7	636211	-0.16	20.7
06-05-2021 00:01:39	30.3492	0	4.96	30	0	-0.0109189	0	72.7	636211	-0.16	20.7
06-05-2021 00:02:39	30.3658	0	4.96	30	0	-0.0109189	0	72.7	636211	-0.16	20.7
06-05-2021 00:03:39	30.3825	0	4.96	30	0	-0.0109189	0	72.7	636211	-0.16	20.7
06-05-2021 00:04:39	30.3992	0	4.96	30	0	-0.0109189	0	72.7	636211	-0.16	20.7
06-05-2021 00:05:39	30.4158	0	4.96	30	0	-0.0109189	0	72.7	636211	-0.16	20.7
06-05-2021 00:06:39	30.4325	0	4.96	30	0	-0.0109189	0	72.7	636211	-0.16	20.7
06-05-2021 00:07:39	30.4492	0	4.96	30	0	-0.0109189	0	72.7	636211	-0.16	20.7
06-05-2021 00:08:39	30.4658	0	4.95	30	0	-0.0109189	0	72.7	636211	-0.16	20.7
06-05-2021 00:09:39	30.4825	0	4.95	30	0	-0.0109189	0	72.7	636211	-0.16	20.7
06-05-2021 00:10:39	30.4992	0	4.95	30	0	-0.0109189	0	72.7	636211	-0.16	20.7
06-05-2021 00:11:39	30.5158	0	4.95	30	0	-0.0109189	0	72.7	636211	-0.16	20.7
06-05-2021 00:12:39	30.5325	0	5	30	0	-0.0109189	0	73.2	636211	-0.16	20.7
06-05-2021 00:13:39	30.5492	0	5	30	0	-0.0109189	0	73.2	636211	-0.16	20.7
06-05-2021 00:14:39	30.5658	0	5	30	0	-0.0109189	0	73.2	636211	-0.16	20.7
06-05-2021 00:15:39	30.5825	0	5	30	0	-0.0109189	0	73.2	636211	-0.16	20.7
06-05-2021 00:16:39	30.5992	0	5	30	0	-0.0109189	0	73.2	636211	-0.16	20.7
06-05-2021 00:17:39	30.6158	0	5	30	0	-0.0109189	0	73.2	636211	-0.16	20.7
06-05-2021 00:18:39	30.6325	0	4.99	30	0	-0.0109189	0	73.2	636211	-0.16	20.7
06-05-2021 00:19:39	30.6492	0	4.99	30	0	-0.0109189	0	73.2	636211	-0.16	20.7
06-05-2021 00:20:39	30.6658	0	4.99	30	0	-0.0109189	0	73.2	636211	-0.16	20.7
06-05-2021 00:21:39	30.6825	0	4.99	30	0	-0.0109189	0	73.2	636211	-0.16	20.6
06-05-2021 00:22:39	30.6992	0	4.99	30	0	-0.0109189	0	73.2	636211	-0.16	20.6
06-05-2021 00:23:39	30.7158	0	4.99	30	0	-0.0109189	0	73.2	636211	-0.16	20.6
06-05-2021 00:24:39	30.7325	0	4.99	30	0	-0.0109189	0	73.2	636211	-0.16	20.6
06-05-2021 00:25:39	30.7492	0	4.99	30	0	-0.0109189	0	73.2	636211	-0.16	20.6
06-05-2021 00:26:39	30.7658	0	4.99	30	0	-0.0109189	0	73.2	636211	-0.16	20.6
06-05-2021 00:27:39	30.7825	0	4.99	30	0	-0.0109189	0	73.2	636211	-0.16	20.6
06-05-2021 00:28:39	30.7992	0	4.99	30	0	-0.0109189	0	73.2	636211	-0.16	20.6
06-05-2021 00:29:39	30.8158	0	4.98	30	0	-0.0109189	0	73.2	636211	-0.16	20.6
06-05-2021 00:30:39	30.8325	0	4.98	30	0	-0.0109189	0	73.2	636211	-0.16	20.6
06-05-2021 00:31:39	30.8492	0	4.98	30	0	-0.0109189	0	73.2	636211	-0.16	20.6
06-05-2021 00:32:39	30.8658	0	4.98	30	0	-0.0109189	0	73.2	636211	-0.16	20.6
06-05-2021 00:33:39	30.8825	0	4.98	30	0	-0.0109189	0	73.2	636211	-0.16	20.6
06-05-2021 00:34:39	30.8992	0	4.98	30	0	-0.0109189	0	73.2	636211	-0.16	20.6
06-05-2021 00:35:39	30.9158	0	4.98	30	0	-0.0109189	0	73.2	636211	-0.16	20.6
06-05-2021 00:36:39	30.9325	0	4.98	30	0	-0.0109189	0	73.2	636211	-0.16	20.6
06-05-2021 00:37:39	30.9492	0	4.98	30	0	-0.0109189	0	73.2	636211	-0.16	20.6
06-05-2021 00:38:39	30.9658	0	4.98	30	0	-0.0109189	0	73.2	636211	-0.16	20.6
06-05-2021 00:39:39	30.9825	0	4.98	30	0	-0.0109189	0	73.2	636211	-0.16	20.6
06-05-2021 00:40:39	30.9992	0	4.98	30	0	-0.0109189	0	73.2	636211	-0.16	20.6
06-05-2021 00:41:39	31.0158	0	4.97	30	0	-0.0109189	0	73.2	636211	-0.16	20.6
06-05-2021 00:42:39	31.0325	0	4.97	30	0	-0.0109189	0	73.2	636211	-0.16	20.6
06-05-2021 00:43:39	31.0492	0	4.97	30	0	-0.0109189	0	73.2	636211	-0.16	20.6
06-05-2021 00:44:39	31.0658	0	4.97	30	0	-0.0109189	0	73.2	636211	-0.16	20.6
06-05-2021 00:45:39	31.0825	0	4.97	30	0	-0.0109189	0	73.2	636211	-0.16	20.6
06-05-2021 00:46:39	31.0992	0	4.97	30	0	-0.0109189	0	73.2	636211	-0.16	20.6
06-05-2021 00:47:39	31.1158	0	4.97	30	0	-0.0109189	0	73.2	636211	-0.16	20.6
06-05-2021 00:48:39	31.1325	0	4.97	30	0	-0.0109189	0	73.2	636211	-0.16	20.6
06-05-2021 00:49:39	31.1492	0	4.97	30	0	-0.0109189	0	73.2	636211	-0.16	20.6
06-05-2021 00:50:39	31.1658	0	4.97	30	0	-0.0109189	0	73.2	636211	-0.16	20.6
06-05-2021 00:51:39	31.1825	0	4.97	30	0	-0.0109189	0	73.2	636211	-0.16	20.6
06-05-2021 00:52:39	31.1992	0	4.97	30	0	-0.0109189	0	73.2	636211	-0.16	20.6
06-05-2021 00:53:39	31.2158	0	4.97	30	0	-0.0109189	0	73.2	636211	-0.16	20.6
06-05-2021 00:54:39	31.2325	0	4.97	30	0	-0.0109189	0	73.2	636211	-0.16	20.6
06-05-2021 00:55:39	31.2492	0	4.96	30	0	-0.0109189	0	73.2	636211	-0.16	20.6
06-05-2021 00:56:39	31.2658	0	4.96	30	0	-0.0109189	0	73.2	636211	-0.16	20.6
06-05-2021 00:57:39	31.2825	0	4.96	30	0	-0.0109189	0	73.2	636211	-0.16	20.6
06-05-2021 00:58:39	31.2992	0	4.96	30	0	-0.0109189	0	73.2	636211	-0.16	20.6
06-05-2021 00:59:39	31.3158	0	4.96	30	0	-0.0109189	0	73.2	636211	-0.16	20.6
06-05-2021 01:00:39	31.3325	0	4.96	30	0	-0.0109189	0	73.2	636211	-0.16	20.6
06-05-2021 01:01:39	31.3492	0	4.96	30	0	-0.0109189	0	73.2	636211	-0.16	20.6
06-05-2021 01:02:39	31.3658	0	4.96	30	0	-0.0109189	0	73.2	636211	-0.16	20.6
06-05-2021 01:03:39	31.3825	0	4.96	30	0	-0.0109189	0	73.2	636211	-0.16	20.6
06-05-2021 01:04:39	31.3992	0	4.96	30	0	-0.0109189	0	73.2	636211	-0.16	20.6
06-05-2021 01:05:39	31.4158	0	4.96	30	0	-0.0109189	0	73.2	636211	-0.16	20.6
06-05-2021 01:06:39	31.4325	0	4.96	30	0	-0.0109189	0	73.2	636211	-0.16	20.6
06-05-2021 01:07:39	31.4492	0	4.96	30	0	-0.0109189	0	73.2	636211	-0.16	20.6
06-05-2021 01:08:39	31.4658	0	4.96	30	0	-0.0109189	0	73.2	636211	-0.16	20.6
06-05-2021 01:09:39	31.4825	0	4.96	30	0	-0.0109189	0	73.2	636211	-0.16	20.6
06-05-2021 01:10:39	31.4992	0	4.96	30	0	-0.0109189	0	73.2	636211	-0.16	20.6
06-05-2021 01:11:39	31.5158	0	4.95	30	0	-0.0109189	0	73.2	636211	-0.16	20.6
06-05-2021 01:12:39	31.5325	0	4.95	30	0	-0.0109189	0	73.2	636211	-0.16	20.6
06-05-2021 01:13:39	31.5492	0	4.95	30	0	-0.0109189	0	73.2	636211	-0.16	20.6
06-05-2021 01:14:39	31.5658	0	4.95	30	0	-0.0109189	0	73.2	636211	-0.16	20.6
06-05-2021 01:15:39	31.5825	0	4.95	30	0	-0.0109189	0	73.2	636211	-0.16	20.6
06-05-2021 01:16:39	31.5992	0	4.95	30	0	-0.0109189	0	73.2	636211	-0.16	20.6
06-05-2021 01:17:39	31.6158	0	4.95	30	0	-0.0109189	0	73.2	636211	-0.16	20.6
06-05-2021 01:18:39	31.6325	0	4.95	30	0	-0.0109189	0	73.2	636211	-0.16	20.6
06-05-2021 01:19:39	31.6492	0	4.95	30	0	-0.0109189	0	73.4	636211	-0.16	20.6
06-05-2021 01:20:39	31.6658	0	4.97	30	0	-0.0109189	0	73.7	636211	-0.16	20.6
06-05-2021 01:21:39	31.6825	0	4.97	30	0	-0.0109189	0	73.7	636211	-0.16	20.6
06-05-2021 01:22:39	31.6992	0	4.97	30	0	-0.0109189	0	73.7	636211	-0.16	20.6
06-05-2021 01:23:39	31.7158	0	4.97	30	0	-0.0109189	0	73.7	636211	-0.16	20.6
06-05-2021 01:24:39	31.7325	0	4.97	30	0	-0.0109189	0	73.7	636211	-0.16	20.6
06-05-2021 01:25:39	31.7492	0	4.97	30	0	-0.0109189	0	73.7	636211	-0.16	20.6
06-05-2021 01:26:39	31.7658	0	4.97	30	0	-0.0109189	0	73.7	636211	-0.16	20.6
06-05-2021 01:27:39	31.7825	0	4.97	30	0	-0.0109189	0	73.7	636211	-0.16	20.6
06-05-2021 01:28:39	31.7992	0	4.97	30	0	-0.0109189	0	73.7	636211	-0.16	20.6
06-05-2021 01:29:39	31.8158	0	4.97	30	0	-0.0109189	0	73.7	636211	-0.16	20.6
06-05-2021 01:30:39	31.8325	0	4.97	30	0	-0.0109189	0	73.7	636211	-0.16	20.6
06-05-2021 01:31:39	31.8492	0	4.97	30	0	-0.0109189	0	73.7	636211	-0.16	20.6
06-05-2021 01:32:39	31.8658	0	4.97	30	0	-0.0109189	0	73.7	636211	-0.16	20.6
06-05-2021 01:33:39	31.8825	0	4.97	30	0	-0.0109189	0	73.7	636211	-0.16	20.6
06-05-2021 01:34:39	31.8992	0	4.97	30	0	-0.0109189	0	73.7	636211	-0.16	20.6
06-05-2021 01:35:39	31.9158	0	4.97	30	0	-0.0109189	0	73.7	636211	-0.16	20.6
06-05-2021 01:36:39	31.9325	0	4.97	30	0	-0.0109189	0	73.7	636211	-0.16	20.6
06-05-2021 01:37:39	31.9492	0	4.97	30	0	-0.0109189	0	73.7	636211	-0.16	20.6
06-05-2021 01:38:39	31.9658	0	4.97	30	0	-0.0109189	0	73.7	636211	-0.16	20.6
06-05-2021 01:39:39	31.9825	0	4.97	30	0	-0.0109189	0	73.7	636211	-0.16	20.6
06-05-2021 01:40:39	31.9992	0	4.97	30	0	-0.0109189	0	73.7	636211	-0.16	20.6
06-05-2021 01:41:39	32.0158	0	4.97	30	0	-0.0109189	0	73.7	636211	-0.16	20.6
06-05-2021 01:42:39	32.0325	0	4.97	30	0	-0.0109189	0	73.7	636211	-0.16	20.6
06-05-2021 01:43:39	32.0492	0	4.97	30	0	-0.0109189	0	73.7	636211	-0.16	20.6
06-05-2021 01:44:39	32.0658	0	4.97	30	0	-0.0109189	0	73.7	636211	-0.16	20.6
06-05-2021 01:45:39	32.0825	0	4.97	30	0	-0.0109189	0	73.7	636211	-0.16	20.6
06-05-2021 01:46:39	32.0992	0	4.96	30	0	-0.0109189	0	73.7	636211	-0.16	20.6
06-05-2021 01:47:39	32.1158	0	4.96	30	0	-0.0109189	0	73.7	636211	-0.16	20.6
06-05-2021 01:48:39	32.1325	0	4.96	30	0	-0.0109189	0	73.7	636211	-0.16	20.6
06-05-2021 01:49:39	32.1492	0	4.96	30	0	-0.0109189	0	73.7	636211	-0.16	20.6
06-05-2021 01:50:39	32.1658	0	4.96	30	0	-0.0109189	0	73.7	636211	-0.16	20.6
06-05-2021 01:51:39	32.1825	0	4.96	30	0	-0.0109189	0	73.7	636211	-0.16	20.6
06-05-2021 01:52:39	32.1992	0	4.96	30	0	-0.0109189	0	73.7	636211	-0.16	20.6
06-05-2021 01:53:39	32.2158	0	4.96	30	0	-0.0109189	0	73.7	636211	-0.16	20.6
06-05-2021 01:54:39	32.2325	0	4.96	30	0	-0.0109189	0	73.7	636211	-0.16	20.6
06-05-2021 01:55:39	32.2492	0	4.96	30	0	-0.0109189	0	73.7	636211	-0.16	20.6
06-05-2021 01:56:39	32.2658	0	4.96	30	0	-0.0109189	0	73.7	636211	-0.16	20.6
06-05-2021 01:57:39	32.2825	0	4.96	30	0	-0.0109189	0	73.7	636211	-0.16	20.6
06-05-2021 01:58:39	32.2992	0	4.96	30	0	-0.0109189	0	73.7	636211	-0.16	20.6
06-05-2021 01:59:39	32.3158	0	4.96	30	0	-0.0109189	0	73.7	636211	-0.16	20.6
06-05-2021 02:00:39	32.3325	0	4.96	30	0	-0.0109189	0	73.7	636211	-0.16	20.6
06-05-2021 02:01:39	32.3492	0	4.96	30	0	-0.0109189	0	73.7	636211	-0.16	20.6
06-05-2021 02:02:39	32.3658	0	4.96	30	0	-0.0109189	0	73.7	636211	-0.16	20.6
06-05-2021 02:03:39	32.3825	0	4.96	30	0	-0.0109189	0	73.7	636211	-0.16	20.6
06-05-2021 02:04:39	32.3992	0	4.96	30	0	-0.0109189	0	73.7	636211	-0.16	20.6
06-05-2021 02:05:39	32.4158	0	4.96	30	0	-0.0109189	0	73.7	636211	-0.16	20.6
06-05-2021 02:06:39	32.4325	0	4.96	30	0	-0.0109189	0	73.7	636211	-0.16	20.6
06-05-2021 02:07:39	32.4492	0	4.96	30	0	-0.0109189	0	73.7	636211	-0.16	20.6
06-05-2021 02:08:39	32.4658	0	4.96	30	0	-0.0109189	0	73.7	636211	-0.16	20.6
06-05-2021 02:09:39	32.4825	0	4.96	30	0	-0.0109189	0	73.7	636211	-0.16	20.6
06-05-2021 02:10:39	32.4992	0	4.96	30	0	-0.0109189	0	73.7	636211	-0.16	20.6
06-05-2021 02:11:39	32.5158	0	4.96	30	0	-0.0109189	0	73.7	636211	-0.16	20.6
06-05-2021 02:12:39	32.5325	0	4.96	30	0	-0.0109189	0	73.7	636211	-0.16	20.6
06-05-2021 02:13:39	32.5492	0	4.96	30	0	-0.0109189	0	73.7	636211	-0.16	20.6
06-05-2021 02:14:39	32.5658	0	4.96	30	0	-0.0109189	0	73.7	636211	-0.16	20.6
06-05-2021 02:15:39	32.5825	0	4.96	30	0	-0.0109189	0	73.7	636211	-0.16	20.6
06-05-2021 02:16:39	32.5992	0	4.96	30	0	-0.0109189	0	73.7	636211	-0.16	20.6
06-05-2021 02:17:39	32.6158	0	4.96	30	0	-0.0109189	0	73.7	636211	-0.16	20.6
06-05-2021 02:18:39	32.6325	0	4.96	30	0	-0.0109189	0	73.7	636211	-0.16	20.6
06-05-2021 02:19:39	32.6492	0	4.96	30	0	-0.0109189	0	73.7	636211	-0.16	20.6
06-05-2021 02:20:39	32.6658	0	4.96	30	0	-0.0109189	0	73.7	636211	-0.16	20.6
06-05-2021 02:21:39	32.6825	0	4.96	30	0	-0.0109189	0	73.7	636211	-0.16	20.6
06-05-2021 02:22:39	32.6992	0	4.96	30	0	-0.0109189	0	73.7	636211	-0.16	20.6
06-05-2021 02:23:39	32.7158	0	4.96	30	0	-0.0109189	0	73.7	636211	-0.16	20.6
06-05-2021 02:24:39	32.7325	0	4.96	30	0	-0.0109189	0	73.7	636211	-0.16	20.6
06-05-2021 02:25:39	32.7492	0	4.96	30	0	-0.0109189	0	73.7	636211	-0.16	20.6
06-05-2021 02:26:39	32.7658	0	4.96	30	0	-0.0109189	0	73.7	636211	-0.16	20.6
06-05-2021 02:27:39	32.7825	0	4.96	30	0	-0.0109189	0	73.7	636211	-0.16	20.6
06-05-2021 02:28:39	32.7992	0	4.96	30	0	-0.0109189	0	73.7	636211	-0.16	20.6
06-05-2021 02:29:39	32.8158	0	4.96	30	0	-0.0109189	0	73.7	636211	-0.16	20.6
06-05-2021 02:30:39	32.8325	0	4.96	30	0	-0.0109189	0	73.7	636211	-0.16	20.6
06-05-2021 02:31:39	32.8492	0	4.96	30	0	-0.0109189	0	73.7	636211	-0.16	20.6
06-05-2021 02:32:39	32.8658	0	4.96	30	0	-0.0109189	0	73.7	636211	-0.16	20.6
06-05-2021 02:33:39	32.8825	0	4.95	30	0	-0.0109189	0	73.7	636211	-0.16	20.6
06-05-2021 02:34:39	32.8992	0	4.95	30	0	-0.0109189	0	73.7	636211	-0.16	20.6
06-05-2021 02:35:39	32.9158	0	4.95	30	0	-0.0109189	0	73.7	636211	-0.16	20.6
06-05-2021 02:36:39	32.9325	0	4.95	30	0	-0.0109189	0	73.7	636211	-0.16	20.6
06-05-2021 02:37:39	32.9492	0	4.95	30	0	-0.0109189	0	73.7	636211	-0.16	20.6
06-05-2021 02:38:39	32.9658	0	4.95	30	0	-0.0109189	0	73.7	636211	-0.16	20.6
06-05-2021 02:39:39	32.9825	0	4.95	30	0	-0.0109189	0	73.7	636211	-0.16	20.6
06-05-2021 02:40:39	32.9992	0	4.95	30	0	-0.0109189	0	73.7	636211	-0.16	20.6
06-05-2021 02:41:39	33.0158	0	4.95	30	0	-0.0109189	0	73.7	636211	-0.16	20.6
06-05-2021 02:42:39	33.0325	0	4.95	30	0	-0.0109189	0	73.7	636211	-0.16	20.6
06-05-2021 02:43:39	33.0492	0	4.95	30	0	-0.0109189	0	73.7	636211	-0.16	20.6
06-05-2021 02:44:39	33.0658	0	4.95	30	0	-0.0109189	0	73.7	636211	-0.16	20.6
06-05-2021 02:45:39	33.0825	0	4.95	30	0	-0.0109189	0	73.7	636211	-0.16	20.6
06-05-2021 02:46:39	33.0992	0	4.95	30	0	-0.0109189	0	73.7	636211	-0.16	20.6
06-05-2021 02:47:39	33.1158	0	4.95	30	0	-0.0109189	0	73.7	636211	-0.16	20.6
06-05-2021 02:48:39	33.1325	0	4.95	30	0	-0.0109189	0	73.7	636211	-0.16	20.6
06-05-2021 02:49:39	33.1492	0	4.95	30	0	-0.0109189	0	73.7	636211	-0.16	20.6
06-05-2021 02:50:39	33.1658	0	4.95	30	0	-0.0109189	0	73.7	636211	-0.16	20.6
06-05-2021 02:51:39	33.1825	0	4.95	30	0	-0.0109189	0	73.7	636211	-0.16	20.6
06-05-2021 02:52:39	33.1992	0	4.95	30	0	-0.0109189	0	73.7	636211	-0.16	20.6
06-05-2021 02:53:39	33.2158	0	4.95	30	0	-0.0109189	0	73.7	636211	-0.16	20.6
06-05-2021 02:54:39	33.2325	0	4.95	30	0	-0.0109189	0	73.7	636211	-0.16	20.6
06-05-2021 02:55:39	33.2492	0	4.95	30	0	-0.0109189	0	73.7	636211	-0.16	20.6
06-05-2021 02:56:39	33.2658	0	4.95	30	0	-0.0109189	0	73.7	636211	-0.16	20.6
06-05-2021 02:57:39	33.2825	0	4.95	30	0	-0.0109189	0	73.7	636211	-0.16	20.6
06-05-2021 02:58:39	33.2992	0	4.95	30	0	-0.0109189	0	73.7	636211	-0.16	20.6
[truncated: 1,046,576+ more rows]

## Sheet: Replicate 1 Cal DM Suc
DM_sucrose	ΔDM_sucrose cumulative	Weight bottle (g)	Weight added to reactor cumulative (g)	Approximate volume added (mL)
3695	0	1321.47	0	0
3722	27	1319.75	1.72	1.43333
3749	54	1318	3.47	2.89167
3862	167	1310.61	10.86	9.05
3887	192	1309	12.47	10.3917
3907	212	1307.78	13.69	11.4083
3939	244	1305.68	15.79	13.1583
	Relation mass			Relation volume
	0.0648345	-0.0131027		0.0540288	-0.0109189
	0.000145125	0.0228067		0.000120937	0.0190056
	0.999975	0.0350078		0.999975	0.0291732
Approximate Density of 50% (w/v) sucrose
1.2	g/ml

## Sheet: Replicate 2
Timestamp	Age (h)	m_do	m_ph	m_temp	dm_sucrose	mL sucrose added	Sucrose flowrate (mL/h)	dm_base	dm_level	CO2	O2
04-05-2021 17:42:03	0	0	4.46	30.4	0	0.0124479	0	4222.02	504123	0.23	21.1
04-05-2021 17:43:00	0.0158333	0	4.47	31.5	0	0.0124479	0	4236.82	504123	0.23	21.1
04-05-2021 17:44:00	0.0325	0	4.48	32	0	0.0124479	0	4253.92	504123	0.23	21.1
04-05-2021 17:45:00	0.0491667	0	4.48	31.9	0	0.0124479	0	4268.82	504123	0.23	21.1
04-05-2021 17:46:00	0.0658333	0	4.47	31.5	0	0.0124479	0	4284.82	504123	0.04	17
04-05-2021 17:47:00	0.0825	0	4.46	31	0	0.0124479	0	4301.92	504123	0.04	17.1
04-05-2021 17:48:00	0.0991667	0	4.45	30.6	0	0.0124479	0	4316.32	504123	0.04	17.1
04-05-2021 17:49:00	0.115833	0	4.8	30.2	0	0.0124479	0	4332.32	504123	0.04	17.1
04-05-2021 17:50:00	0.1325	0	5.01	30	0	0.0124479	0	4333.82	504123	0.04	17.1
04-05-2021 17:51:00	0.149167	16.4	5.04	29.8	0	0.0124479	0	4333.82	504123	0.04	17.1
04-05-2021 17:52:00	0.165833	50.4	5.04	29.8	0	0.0124479	0	4333.82	504123	0.04	17.1
04-05-2021 17:53:00	0.1825	53.9	5.04	29.8	0	0.0124479	0	4333.82	504123	0.04	17.1
04-05-2021 17:54:00	0.199167	54.3	5.07	29.9	0	0.0124479	0	4333.82	504123	0.04	17.1
04-05-2021 17:55:00	0.215833	54.4	5.07	30.1	0	0.0124479	0	4333.82	504123	0.04	17.1
04-05-2021 17:56:00	0.2325	54.6	5.07	30.2	0	0.0124479	0	4333.82	504123	0.04	17.1
04-05-2021 17:57:00	0.249167	54.7	5.07	30.3	0	0.0124479	0	4333.82	504123	0.04	17.1
04-05-2021 17:58:00	0.265833	63.7	5.07	30.3	0	0.0124479	0	4333.82	504123	0.04	17.1
04-05-2021 17:59:00	0.2825	5.6	5.07	30.4	0	0.0124479	0	4333.82	504123	0.04	17.1
04-05-2021 18:00:00	0.299167	0.8	5.07	30.4	0	0.0124479	0	4333.82	504123	0.04	17.1
04-05-2021 18:01:00	0.315833	0.4	5.08	30.4	0	0.0124479	0	4333.82	504123	0.04	17.1
04-05-2021 18:02:00	0.3325	0.2	5.07	30.3	0	0.0124479	0	4333.82	504123	0.04	17.1
04-05-2021 18:03:00	0.349167	0.1	5.07	30.3	0	0.0124479	0	4333.82	504123	0.04	17.1
04-05-2021 18:04:00	0.365833	0.4	5.08	30.2	0	0.0124479	0	4333.82	504123	0	1.48
04-05-2021 18:05:00	0.3825	0.1	5.08	29.9	0	0.0124479	0	4333.82	504123	0	1.48
04-05-2021 18:06:00	0.399167	0	5.08	30	0	0.0124479	0	4333.82	504123	0	1.48
04-05-2021 18:07:00	0.415833	0.5	5.08	29.8	0	0.0124479	0	4333.82	504123	0	1.48
04-05-2021 18:08:00	0.4325	0.1	5.08	29.9	0	0.0124479	0	4333.82	504123	0	1.48
04-05-2021 18:09:00	0.449167	0	5.08	30	0	0.0124479	0	0	504123	0	1.48
04-05-2021 18:10:00	0.465833	0	5.08	30.1	0	0.0124479	0	0	504123	0	1.48
04-05-2021 18:11:00	0.4825	0	5.08	30.3	0	0.0124479	0	0	504123	0	1.48
04-05-2021 18:12:00	0.499167	0	5.09	30.3	0	0.0124479	0	0	504123	0	1.48
04-05-2021 18:13:00	0.515833	0	5.09	30.4	0	0.0124479	0	0	504123	0	1.48
04-05-2021 18:14:00	0.5325	0	5.09	30.4	0	0.0124479	0	0	504123	0	1.48
04-05-2021 18:15:00	0.549167	0	5.08	30.3	0	0.0124479	0	0	504123	0	1.48
04-05-2021 18:16:00	0.565833	0	5.11	30.3	0	0.0124479	0	0	504123	0	1.48
04-05-2021 18:17:00	0.5825	0	5.11	30.2	0	0.0124479	0	0	504123	0	1.48
04-05-2021 18:18:00	0.599167	0	5.11	30.2	0	0.0124479	0	0	504123	0	1.48
04-05-2021 18:19:00	0.615833	0	5.11	30.2	0	0.0124479	0	0	504123	0	1.48
04-05-2021 18:20:00	0.6325	0	5.11	30.2	0	0.0124479	0	0	504123	0	1.48
04-05-2021 18:21:00	0.649167	0	5.11	30.1	0	0.0124479	0	0	504123	0.02	0.12
04-05-2021 18:22:00	0.665833	0	5.11	30.1	0	0.0124479	0	0	504123	0.02	0.12
04-05-2021 18:23:00	0.6825	0	5.11	30.1	0	0.0124479	0	0	504123	0.02	0.12
04-05-2021 18:24:00	0.699167	0	5.11	30.1	0	0.0124479	0	0	504123	0.02	0.12
04-05-2021 18:25:00	0.715833	0	5.11	30.2	0	0.0124479	0	0	504123	0.02	0.12
04-05-2021 18:26:00	0.7325	0	5.11	30.2	0	0.0124479	0	0	504123	0.02	0.12
04-05-2021 18:27:00	0.749167	0	5.11	30.2	0	0.0124479	0	0	504123	0.02	0.12
04-05-2021 18:28:00	0.765833	0	5.11	30.2	0	0.0124479	0	0	504123	0.02	0.12
04-05-2021 18:29:00	0.7825	0	5.11	30.2	0	0.0124479	0	0	504123	0.02	0.12
04-05-2021 18:30:00	0.799167	0	5.11	30.2	0	0.0124479	0	0	504123	0.02	0.12
04-05-2021 18:31:00	0.815833	0	5.11	30.1	0	0.0124479	0	0	504123	0.02	0.12
04-05-2021 18:32:00	0.8325	0	5.1	30.1	0	0.0124479	0	0	504123	0.02	0.12
04-05-2021 18:33:00	0.849167	0	5.1	30.1	0	0.0124479	0	0	504123	0.02	0.12
04-05-2021 18:34:00	0.865833	0	5.11	30.1	0	0.0124479	0	0	504123	0.02	0.12
04-05-2021 18:35:00	0.8825	0	5.11	30.1	0	0.0124479	0	0	504123	0.02	0.12
04-05-2021 18:36:00	0.899167	0	5.11	30.1	0	0.0124479	0	0	504123	0.02	0.12
04-05-2021 18:37:00	0.915833	0	5.1	30.1	0	0.0124479	0	0	504123	0.02	0.12
04-05-2021 18:38:00	0.9325	0	5.1	30.1	0	0.0124479	0	0	504123	0.02	0.12
04-05-2021 18:39:00	0.949167	0	5.1	30.1	0	0.0124479	0	0	504123	0.03	0.11
04-05-2021 18:40:00	0.965833	0	5.1	30.1	0	0.0124479	0	0	504123	0.03	0.11
04-05-2021 18:41:00	0.9825	0	5.1	30.1	0	0.0124479	0	0	504123	0.03	0.11
04-05-2021 18:42:00	0.999167	0	5.1	30.1	0	0.0124479	0	0	504123	0.03	0.11
04-05-2021 18:43:00	1.01583	0	5.1	30.1	0	0.0124479	0	0	504123	0.03	0.11
04-05-2021 18:44:00	1.0325	0	5.1	30.1	0	0.0124479	0	0	504123	0.03	0.11
04-05-2021 18:45:00	1.04917	0	5.1	30.1	0	0.0124479	0	0	504123	0.03	0.11
04-05-2021 18:46:00	1.06583	0	5.1	30.1	0	0.0124479	0	0	504123	0.03	0.11
04-05-2021 18:47:00	1.0825	0	5.12	30.1	0	0.0124479	0	0	504123	0.03	0.11
04-05-2021 18:48:00	1.09917	0	5.12	30.1	0	0.0124479	0	0	504123	0.03	0.11
04-05-2021 18:49:00	1.11583	0	5.12	30.1	0	0.0124479	0	0	504123	0.03	0.11
04-05-2021 18:50:00	1.1325	0	5.12	30.1	0	0.0124479	0	0	504123	0.03	0.11
04-05-2021 18:51:00	1.14917	0	5.12	30.1	0	0.0124479	0	0	504123	0.03	0.11
04-05-2021 18:52:00	1.16583	0	5.12	30.1	0	0.0124479	0	0	504123	0.03	0.11
04-05-2021 18:53:00	1.1825	0	5.12	30.1	0	0.0124479	0	0	504123	0.03	0.11
04-05-2021 18:54:00	1.19917	0	5.12	30.1	0	0.0124479	0	0	504123	0.03	0.11
04-05-2021 18:55:00	1.21583	0	5.12	30.1	0	0.0124479	0	0	504123	0.03	0.11
04-05-2021 18:56:00	1.2325	0	5.12	30.1	0	0.0124479	0	0	504123	0.03	0.11
04-05-2021 18:57:00	1.24917	0	5.12	30.1	0	0.0124479	0	0	504123	0.03	0.11
04-05-2021 18:58:00	1.26583	0	5.12	30.1	0	0.0124479	0	0	504123	0.03	0.11
04-05-2021 18:59:00	1.2825	0	5.12	30.1	0	0.0124479	0	0	504123	0.03	0.11
04-05-2021 19:00:00	1.29917	0	5.12	30.1	0	0.0124479	0	0	504123	0.03	0.11
04-05-2021 19:01:00	1.31583	0	5.12	30.1	0	0.0124479	0	0	504123	0.03	0.11
04-05-2021 19:02:00	1.3325	0	5.12	30.1	0	0.0124479	0	0	504123	0.03	0.11
04-05-2021 19:03:00	1.34917	0	5.12	30.1	0	0.0124479	0	0	504123	0.03	0.11
04-05-2021 19:04:00	1.36583	0	5.12	30.1	0	0.0124479	0	0	504123	0.03	0.11
04-05-2021 19:05:00	1.3825	0	5.12	30.1	0	0.0124479	0	0	504123	0.03	0.11
04-05-2021 19:06:00	1.39917	0	5.12	30.1	0	0.0124479	0	0	504123	0.03	0.11
04-05-2021 19:07:00	1.41583	0	5.12	30.1	0	0.0124479	0	0	504123	0.03	0.11
04-05-2021 19:08:00	1.4325	0	5.12	30.1	0	0.0124479	0	0	504123	0.03	0.11
04-05-2021 19:09:00	1.44917	0	5.12	30.1	0	0.0124479	0	0	504123	0.03	0.11
04-05-2021 19:10:00	1.46583	0	5.12	30.1	0	0.0124479	0	0	504123	0.03	0.11
04-05-2021 19:11:00	1.4825	0	5.12	30.1	0	0.0124479	0	0	504123	0.03	0.11
04-05-2021 19:12:00	1.49917	0	5.12	30.1	0	0.0124479	0	0	504123	0.03	0.11
04-05-2021 19:13:00	1.51583	0	5.12	30.1	0	0.0124479	0	0	504123	0.03	0.11
04-05-2021 19:14:00	1.5325	0	5.12	30.1	0	0.0124479	0	0	504123	0.03	0.11
04-05-2021 19:15:00	1.54917	0	5.12	30	0	0.0124479	0	0	504123	0.03	0.11
04-05-2021 19:16:00	1.56583	0	5.12	30.1	0	0.0124479	0	0	504123	0.03	0.11
04-05-2021 19:17:00	1.5825	0	5.12	30	0	0.0124479	0	0	504123	0.03	0.11
04-05-2021 19:18:00	1.59917	0	5.12	30.1	0	0.0124479	0	0	504123	0.03	0.11
04-05-2021 19:19:00	1.61583	0	5.12	30	0	0.0124479	0	0	504123	0.03	0.11
04-05-2021 19:20:00	1.6325	0	5.12	30	0	0.0124479	0	0	504123	0.03	0.11
04-05-2021 19:21:00	1.64917	0	5.12	30	0	0.0124479	0	0	504123	0.03	0.11
04-05-2021 19:22:00	1.66583	0	5.12	30.1	0	0.0124479	0	0	504123	0.03	0.11
04-05-2021 19:23:00	1.6825	0	5.12	30.1	0	0.0124479	0	0	504123	0.03	0.11
04-05-2021 19:24:00	1.69917	0	5.12	30.1	0	0.0124479	0	0	504123	0.03	0.11
04-05-2021 19:25:00	1.71583	0	5.12	30	0	0.0124479	0	0	504123	0.03	0.11
04-05-2021 19:26:00	1.7325	0	5.12	30	0	0.0124479	0	0	504123	0.03	0.11
04-05-2021 19:27:00	1.74917	0	5.12	30	0	0.0124479	0	0	504123	0.03	0.11
04-05-2021 19:28:00	1.76583	0	5.12	30	0	0.0124479	0	0	504123	0.03	0.11
04-05-2021 19:29:00	1.7825	0	5.12	30	0	0.0124479	0	0	504123	0.03	0.11
04-05-2021 19:30:00	1.79917	0	5.12	30.1	0	0.0124479	0	0	504123	0.03	0.11
04-05-2021 19:31:00	1.81583	0	5.12	30	0	0.0124479	0	0	504123	0.03	0.11
04-05-2021 19:32:00	1.8325	0	5.12	30	0	0.0124479	0	0	504123	0.03	0.11
04-05-2021 19:33:00	1.84917	0	5.12	30	0	0.0124479	0	0	504123	0.03	0.11
04-05-2021 19:34:00	1.86583	0	5.12	30	0	0.0124479	0	0	504123	0.03	0.11
04-05-2021 19:35:00	1.8825	0	5.12	30	0	0.0124479	0	0	504123	0.03	0.11
04-05-2021 19:36:00	1.89917	0	5.12	30	0	0.0124479	0	0	504123	0.03	0.11
04-05-2021 19:37:00	1.91583	0	5.12	30	0	0.0124479	0	0	504123	0.03	0.11
04-05-2021 19:38:00	1.9325	0	5.12	30	0	0.0124479	0	0	504123	0.03	0.11
04-05-2021 19:39:00	1.94917	0	5.12	30	0	0.0124479	0	0	504123	0.03	0.11
04-05-2021 19:40:00	1.96583	0	5.12	30	0	0.0124479	0	0	504123	0.03	0.11
04-05-2021 19:41:00	1.9825	0	5.12	30	0	0.0124479	0	0	504123	0.03	0.11
04-05-2021 19:42:00	1.99917	0	5.12	30	0	0.0124479	0	0	504123	0.03	0.11
04-05-2021 19:43:00	2.01583	0	5.12	30	0	0.0124479	0	0	504123	0.03	0.11
04-05-2021 19:44:00	2.0325	0	5.12	30	0	0.0124479	0	0	504123	0.03	0.11
04-05-2021 19:45:00	2.04917	0	5.12	30	0	0.0124479	0	0	504123	0.03	0.11
04-05-2021 19:46:00	2.06583	0	5.12	30	0	0.0124479	0	0	504123	0.03	0.11
04-05-2021 19:47:00	2.0825	0	5.12	30	0	0.0124479	0	0	504123	0.03	0.11
04-05-2021 19:48:00	2.09917	0	5.12	30	0	0.0124479	0	0	504123	0.03	0.11
04-05-2021 19:49:00	2.11583	0	5.12	30	0	0.0124479	0	0	504123	0.03	0.11
04-05-2021 19:50:00	2.1325	0	5.12	30	0	0.0124479	0	0	504123	0.03	0.11
04-05-2021 19:51:00	2.14917	0	5.12	30	0	0.0124479	0	0	504123	0.03	0.11
04-05-2021 19:52:00	2.16583	0	5.12	30	0	0.0124479	0	0	504123	0.03	0.11
04-05-2021 19:53:00	2.1825	0	5.11	30	0	0.0124479	0	0	504123	0.03	0.11
04-05-2021 19:54:00	2.19917	0	5.11	30	0	0.0124479	0	0	504123	0.03	0.11
04-05-2021 19:55:00	2.21583	0	5.11	30	0	0.0124479	0	0	504123	0.03	0.11
04-05-2021 19:56:00	2.2325	0	5.11	30	0	0.0124479	0	0	504123	0.03	0.11
04-05-2021 19:57:00	2.24917	0	5.11	30	0	0.0124479	0	0	504123	0.03	0.11
04-05-2021 19:58:00	2.26583	0	5.11	30	0	0.0124479	0	0	504123	0.03	0.11
04-05-2021 19:59:00	2.2825	0	5.11	30	0	0.0124479	0	0	504123	0.03	0.11
04-05-2021 20:00:00	2.29917	0	5.11	30	0	0.0124479	0	0	504123	0.03	0.11
04-05-2021 20:01:00	2.31583	0	5.11	30	0	0.0124479	0	0	504123	0.03	0.11
04-05-2021 20:02:00	2.3325	0	5.11	30	0	0.0124479	0	0	504123	0.03	0.11
04-05-2021 20:03:00	2.34917	0	5.11	30	0	0.0124479	0	0	504123	0.03	0.11
04-05-2021 20:04:00	2.36583	0	5.11	30	0	0.0124479	0	0	504123	0.03	0.11
04-05-2021 20:05:00	2.3825	0	5.11	30	0	0.0124479	0	0	504123	0.03	0.11
04-05-2021 20:06:00	2.39917	0	5.11	30	0	0.0124479	0	0	504123	0.03	0.11
04-05-2021 20:07:00	2.41583	0	5.11	30	0	0.0124479	0	0	504123	0.03	0.11
04-05-2021 20:08:00	2.4325	0	5.11	30	0	0.0124479	0	0	504123	0.03	0.11
04-05-2021 20:09:00	2.44917	0	5.11	30	0	0.0124479	0	0	504123	0.03	0.11
04-05-2021 20:10:00	2.46583	0	5.11	30	0	0.0124479	0	0	504123	0.03	0.11
04-05-2021 20:11:00	2.4825	0	5.11	30	0	0.0124479	0	0	504123	0.03	0.11
04-05-2021 20:12:00	2.49917	0	5.11	30	0	0.0124479	0	0	504123	0.03	0.11
04-05-2021 20:13:00	2.51583	0	5.11	30	0	0.0124479	0	0	504123	0.03	0.11
04-05-2021 20:14:00	2.5325	0	5.11	30	0	0.0124479	0	0	504123	0.03	0.11
04-05-2021 20:15:00	2.54917	0	5.11	30	0	0.0124479	0	0	504123	0.03	0.11
04-05-2021 20:16:00	2.56583	0	5.11	30	0	0.0124479	0	0	504123	0.03	0.11
04-05-2021 20:17:00	2.5825	0	5.11	30	0	0.0124479	0	0	504123	0.03	0.11
04-05-2021 20:18:00	2.59917	0	5.11	30	0	0.0124479	0	0	504123	0.03	0.11
04-05-2021 20:19:00	2.61583	0	5.11	30	0	0.0124479	0	0	504123	0.03	0.11
04-05-2021 20:20:00	2.6325	0	5.11	30	0	0.0124479	0	0	504123	0.03	0.11
04-05-2021 20:21:00	2.64917	0	5.11	30	0	0.0124479	0	0	504123	0.03	0.11
04-05-2021 20:22:00	2.66583	0	5.11	30	0	0.0124479	0	0	504123	0.03	0.11
04-05-2021 20:23:00	2.6825	0	5.11	30	0	0.0124479	0	0	504123	0.03	0.11
04-05-2021 20:24:00	2.69917	0	5.11	30	0	0.0124479	0	0	504123	0.03	0.11
04-05-2021 20:25:00	2.71583	0	5.11	30	0	0.0124479	0	0	504123	0.03	0.11
04-05-2021 20:26:00	2.7325	0	5.11	30	0	0.0124479	0	0	504123	0.03	0.11
04-05-2021 20:27:00	2.74917	0	5.11	30	0	0.0124479	0	0	504123	0.03	0.11
04-05-2021 20:28:00	2.76583	0	5.11	30	0	0.0124479	0	0	504123	0.03	0.11
04-05-2021 20:29:00	2.7825	0	5.11	30	0	0.0124479	0	0	504123	0.03	0.11
04-05-2021 20:30:00	2.79917	0	5.11	30	0	0.0124479	0	0	504123	0.03	0.11
04-05-2021 20:31:00	2.81583	0	5.11	30	0	0.0124479	0	0	504123	0.03	0.11
04-05-2021 20:32:00	2.8325	0	5.11	30	0	0.0124479	0	0	504123	0.03	0.11
04-05-2021 20:33:00	2.84917	0	5.11	30	0	0.0124479	0	0	504123	0.03	0.11
04-05-2021 20:34:00	2.86583	0	5.11	30	0	0.0124479	0	0	504123	0.03	0.11
04-05-2021 20:35:00	2.8825	0	5.11	30	0	0.0124479	0	0	504123	0.03	0.11
04-05-2021 20:36:00	2.89917	0	5.11	30	0	0.0124479	0	0	504123	0.03	0.11
04-05-2021 20:37:00	2.91583	0	5.11	30	0	0.0124479	0	0	504123	0.03	0.11
04-05-2021 20:38:00	2.9325	0	5.11	30	0	0.0124479	0	0	504123	0.03	0.11
04-05-2021 20:39:00	2.94917	0	5.11	30	0	0.0124479	0	0	504123	0.03	0.11
04-05-2021 20:40:00	2.96583	0	5.11	30	0	0.0124479	0	0	504123	0.03	0.11
04-05-2021 20:41:00	2.9825	0	5.11	30	0	0.0124479	0	0	504123	0.04	0.11
04-05-2021 20:42:00	2.99917	0	5.1	30	0	0.0124479	0	0	504123	0.04	0.11
04-05-2021 20:43:00	3.01583	0	5.11	30	0	0.0124479	0	0	504123	0.04	0.11
04-05-2021 20:44:00	3.0325	0	5.1	30	0	0.0124479	0	0	504123	0.04	0.11
04-05-2021 20:45:00	3.04917	0	5.1	30	0	0.0124479	0	0	504123	0.04	0.11
04-05-2021 20:46:00	3.06583	0	5.1	30	0	0.0124479	0	0	504123	0.04	0.11
04-05-2021 20:47:00	3.0825	0	5.1	30	0	0.0124479	0	0	504123	0.04	0.11
04-05-2021 20:48:00	3.09917	0	5.1	30	0	0.0124479	0	0	504123	0.04	0.11
04-05-2021 20:49:00	3.11583	0	5.1	30	0	0.0124479	0	0	504123	0.04	0.11
04-05-2021 20:50:00	3.1325	0	5.1	30	0	0.0124479	0	0	504123	0.04	0.11
04-05-2021 20:51:00	3.14917	0	5.1	30	0	0.0124479	0	0	504123	0.04	0.11
04-05-2021 20:52:00	3.16583	0	5.1	30	0	0.0124479	0	0	504123	0.04	0.11
04-05-2021 20:53:00	3.1825	0	5.1	30	0	0.0124479	0	0	504123	0.04	0.11
04-05-2021 20:54:00	3.19917	0	5.1	30	0	0.0124479	0	0	504123	0.04	0.11
04-05-2021 20:55:00	3.21583	0	5.1	30	0	0.0124479	0	0	504123	0.04	0.11
04-05-2021 20:56:00	3.2325	0	5.1	30	0	0.0124479	0	0	504123	0.04	0.11
04-05-2021 20:57:00	3.24917	0	5.1	30	0	0.0124479	0	0	504123	0.04	0.11
04-05-2021 20:58:00	3.26583	0	5.1	30	0	0.0124479	0	0	504123	0.04	0.11
04-05-2021 20:59:00	3.2825	0	5.1	30	0	0.0124479	0	0	504123	0.04	0.1
04-05-2021 21:00:00	3.29917	0	5.12	30	0	0.0124479	0	0	504123	0.04	0.1
04-05-2021 21:01:00	3.31583	0	5.12	30	0	0.0124479	0	0	504123	0.04	0.1
04-05-2021 21:02:00	3.3325	0	5.12	30	0	0.0124479	0	0	504123	0.04	0.1
04-05-2021 21:03:00	3.34917	0	5.12	30	0	0.0124479	0	0	504123	0.04	0.1
04-05-2021 21:04:00	3.36583	0	5.12	30	0	0.0124479	0	0	504123	0.04	0.1
04-05-2021 21:05:00	3.3825	0	5.12	30	0	0.0124479	0	0	504123	0.04	0.1
04-05-2021 21:06:00	3.39917	0	5.12	30	0	0.0124479	0	0	504123	0.04	0.1
04-05-2021 21:07:00	3.41583	0	5.12	30	0	0.0124479	0	0	504123	0.04	0.1
04-05-2021 21:08:00	3.4325	0	5.12	30	0	0.0124479	0	0	504123	0.04	0.1
04-05-2021 21:09:00	3.44917	0	5.12	30	0	0.0124479	0	0	504123	0.04	0.1
04-05-2021 21:10:00	3.46583	0	5.12	30	0	0.0124479	0	0	504123	0.04	0.1
04-05-2021 21:11:00	3.4825	0	5.12	30	0	0.0124479	0	0	504123	0.04	0.1
04-05-2021 21:12:00	3.49917	0	5.12	30	0	0.0124479	0	0	504123	0.04	0.1
04-05-2021 21:13:00	3.51583	0	5.12	30	0	0.0124479	0	0	504123	0.04	0.1
04-05-2021 21:14:00	3.5325	0	5.11	30	0	0.0124479	0	0	504123	0.04	0.1
04-05-2021 21:15:00	3.54917	0	5.11	30	0	0.0124479	0	0	504123	0.04	0.1
04-05-2021 21:16:00	3.56583	0	5.11	30	0	0.0124479	0	0	504123	0.04	0.09
04-05-2021 21:17:00	3.5825	0	5.11	30	0	0.0124479	0	0	504123	0.04	0.09
04-05-2021 21:18:00	3.59917	0	5.11	30	0	0.0124479	0	0	504123	0.04	0.09
04-05-2021 21:19:00	3.61583	0	5.11	30	0	0.0124479	0	0	504123	0.04	0.09
04-05-2021 21:20:00	3.6325	0	5.11	30	0	0.0124479	0	0	504123	0.04	0.09
04-05-2021 21:21:00	3.64917	0	5.11	30	0	0.0124479	0	0	504123	0.04	0.09
04-05-2021 21:22:00	3.66583	0	5.11	30	0	0.0124479	0	0	504123	0.04	0.09
04-05-2021 21:23:00	3.6825	0	5.11	30	0	0.0124479	0	0	504123	0.04	0.09
04-05-2021 21:24:00	3.69917	0	5.11	30	0	0.0124479	0	0	504123	0.04	0.09
04-05-2021 21:25:00	3.71583	0	5.11	30	0	0.0124479	0	0	504123	0.04	0.09
04-05-2021 21:26:00	3.7325	0	5.11	30	0	0.0124479	0	0	504123	0.04	0.09
04-05-2021 21:27:00	3.74917	0	5.11	30	0	0.0124479	0	0	504123	0.04	0.09
04-05-2021 21:28:00	3.76583	0	5.11	30	0	0.0124479	0	0	504123	0.04	0.09
04-05-2021 21:29:00	3.7825	0	5.11	30	0	0.0124479	0	0	504123	0.04	0.09
04-05-2021 21:30:00	3.79917	0	5.11	30	0	0.0124479	0	0	504123	0.04	0.09
04-05-2021 21:31:00	3.81583	0	5.11	30	0	0.0124479	0	0	504123	0.04	0.09
04-05-2021 21:32:00	3.8325	0	5.11	30	0	0.0124479	0	0	504123	0.04	0.09
04-05-2021 21:33:00	3.84917	0	5.11	30	0	0.0124479	0	0	504123	0.04	0.09
04-05-2021 21:34:00	3.86583	0	5.11	30	0	0.0124479	0	0	504123	0.04	0.08
04-05-2021 21:35:00	3.8825	0	5.11	30	0	0.0124479	0	0	504123	0.04	0.08
04-05-2021 21:36:00	3.89917	0	5.11	30	0	0.0124479	0	0	504123	0.04	0.08
04-05-2021 21:37:00	3.91583	0	5.11	30	0	0.0124479	0	0	504123	0.04	0.08
04-05-2021 21:38:00	3.9325	0	5.11	30	0	0.0124479	0	0	504123	0.04	0.08
04-05-2021 21:39:00	3.94917	0	5.11	30	0	0.0124479	0	0	504123	0.04	0.08
04-05-2021 21:40:00	3.96583	0	5.11	30	0	0.0124479	0	0	504123	0.04	0.08
04-05-2021 21:41:00	3.9825	0	5.11	30	0	0.0124479	0	0	504123	0.04	0.08
04-05-2021 21:42:00	3.99917	0	5.11	30	0	0.0124479	0	0	504123	0.04	0.08
04-05-2021 21:43:00	4.01583	0	5.11	30	0	0.0124479	0	0	504123	0.04	0.08
04-05-2021 21:44:00	4.0325	0	5.11	30	0	0.0124479	0	0	504123	0.04	0.08
04-05-2021 21:45:00	4.04917	0	5.1	30	0	0.0124479	0	0	504123	0.04	0.08
04-05-2021 21:46:00	4.06583	0	5.1	30	0	0.0124479	0	0	504123	0.04	0.08
04-05-2021 21:47:00	4.0825	0	5.1	30	0	0.0124479	0	0	504123	0.04	0.08
04-05-2021 21:48:00	4.09917	0	5.1	30	0	0.0124479	0	0	504123	0.04	0.08
04-05-2021 21:49:00	4.11583	0	5.1	30	0	0.0124479	0	0	504123	0.04	0.08
04-05-2021 21:50:00	4.1325	0	5.1	30	0	0.0124479	0	0	504123	0.04	0.08
04-05-2021 21:51:00	4.14917	0	5.1	30	0	0.0124479	0	0	504123	0.04	0.08
04-05-2021 21:52:00	4.16583	0	5.1	30	0	0.0124479	0	0	504123	0.05	0.09
04-05-2021 21:53:00	4.1825	0	5.1	30	0	0.0124479	0	0	504123	0.05	0.09
04-05-2021 21:54:00	4.19917	0	5.1	30	0	0.0124479	0	0	504123	0.05	0.09
04-05-2021 21:55:00	4.21583	0	5.1	30	0	0.0124479	0	0	504123	0.05	0.09
04-05-2021 21:56:00	4.2325	0	5.1	30	0	0.0124479	0	0	504123	0.05	0.09
04-05-2021 21:57:00	4.24917	0	5.1	30	0	0.0124479	0	0	504123	0.05	0.09
04-05-2021 21:58:00	4.26583	0	5.1	30	0	0.0124479	0	0	504123	0.05	0.09
04-05-2021 21:59:00	4.2825	0	5.1	30	0	0.0124479	0	0	504123	0.05	0.09
04-05-2021 22:00:00	4.29917	0	5.1	30	0	0.0124479	0	0	504123	0.05	0.09
04-05-2021 22:01:00	4.31583	0	5.1	30	0	0.0124479	0	0	504123	0.05	0.09
04-05-2021 22:02:00	4.3325	0	5.1	30	0	0.0124479	0	0	504123	0.05	0.09
04-05-2021 22:03:00	4.34917	0	5.1	30	0	0.0124479	0	0	504123	0.05	0.09
04-05-2021 22:04:00	4.36583	0	5.1	30	0	0.0124479	0	0	504123	0.05	0.09
04-05-2021 22:05:00	4.3825	0	5.1	30	0	0.0124479	0	0	504123	0.05	0.09
04-05-2021 22:06:00	4.39917	0	5.1	30	0	0.0124479	0	0	504123	0.05	0.09
04-05-2021 22:07:00	4.41583	0	5.1	30	0	0.0124479	0	0	504123	0.05	0.09
04-05-2021 22:08:00	4.4325	0	5.1	30	0	0.0124479	0	0	504123	0.05	0.09
04-05-2021 22:09:00	4.44917	0	5.1	30	0	0.0124479	0	0	504123	0.05	0.09
04-05-2021 22:10:00	4.46583	0	5.1	30	0	0.0124479	0	0	504123	0.05	0.09
04-05-2021 22:11:00	4.4825	0	5.1	30	0	0.0124479	0	0	504123	0.05	0.09
04-05-2021 22:12:00	4.49917	0	5.1	30	0	0.0124479	0	0	504123	0.05	0.09
04-05-2021 22:13:00	4.51583	0	5.09	30	0	0.0124479	0	0	504123	0.05	0.09
04-05-2021 22:14:00	4.5325	0	5.09	30	0	0.0124479	0	0	504123	0.05	0.09
04-05-2021 22:15:00	4.54917	0	5.09	30	0	0.0124479	0	0	504123	0.05	0.09
04-05-2021 22:16:00	4.56583	0	5.09	30	0	0.0124479	0	0	504123	0.05	0.09
04-05-2021 22:17:00	4.5825	0	5.09	30	0	0.0124479	0	0	504123	0.05	0.09
04-05-2021 22:18:00	4.59917	0	5.09	30	0	0.0124479	0	0	504123	0.05	0.09
04-05-2021 22:19:00	4.61583	0	5.09	30	0	0.0124479	0	0	504123	0.05	0.09
04-05-2021 22:20:00	4.6325	0	5.09	30	0	0.0124479	0	0	504123	0.05	0.09
04-05-2021 22:21:00	4.64917	0	5.09	30	0	0.0124479	0	0	504123	0.05	0.09
04-05-2021 22:22:00	4.66583	0	5.09	30	0	0.0124479	0	0	504123	0.05	0.09
04-05-2021 22:23:00	4.6825	0	5.09	30	0	0.0124479	0	0	504123	0.05	0.09
04-05-2021 22:24:00	4.69917	0	5.09	30	0	0.0124479	0	0	504123	0.05	0.09
04-05-2021 22:25:00	4.71583	0	5.09	30	0	0.0124479	0	0	504123	0.05	0.09
04-05-2021 22:26:00	4.7325	0	5.09	30	0	0.0124479	0	0	504123	0.05	0.09
04-05-2021 22:27:00	4.74917	0	5.09	30	0	0.0124479	0	0	504123	0.05	0.09
04-05-2021 22:28:00	4.76583	0	5.09	30	0	0.0124479	0	0	504123	0.05	0.09
04-05-2021 22:29:00	4.7825	0	5.09	30	0	0.0124479	0	0	504123	0.05	0.09
04-05-2021 22:30:00	4.79917	0	5.09	30	0	0.0124479	0	0	504123	0.05	0.09
04-05-2021 22:31:00	4.81583	0	5.09	30	0	0.0124479	0	0	504123	0.05	0.09
04-05-2021 22:32:00	4.8325	0	5.09	30	0	0.0124479	0	0	504123	0.05	0.09
04-05-2021 22:33:00	4.84917	0	5.09	30	0	0.0124479	0	0	504123	0.05	0.09
04-05-2021 22:34:00	4.86583	0	5.09	30	0	0.0124479	0	0	504123	0.05	0.09
04-05-2021 22:35:00	4.8825	0	5.09	30	0	0.0124479	0	0	504123	0.05	0.09
04-05-2021 22:36:00	4.89917	0	5.09	30	0	0.0124479	0	0	504123	0.05	0.09
04-05-2021 22:37:00	4.91583	0	5.08	30	0	0.0124479	0	0	504123	0.05	0.09
04-05-2021 22:38:00	4.9325	0	5.08	30	0	0.0124479	0	0	504123	0.05	0.09
04-05-2021 22:39:00	4.94917	0	5.08	30	0	0.0124479	0	0	504123	0.05	0.09
04-05-2021 22:40:00	4.96583	0	5.08	30	0	0.0124479	0	0	504123	0.05	0.09
04-05-2021 22:41:00	4.9825	0	5.08	30	0	0.0124479	0	0	504123	0.05	0.09
04-05-2021 22:42:00	4.99917	0	5.08	30	0	0.0124479	0	0	504123	0.05	0.09
04-05-2021 22:43:00	5.01583	0	5.08	30	0	0.0124479	0	0	504123	0.05	0.09
04-05-2021 22:44:00	5.0325	0	5.08	30	0	0.0124479	0	0	504123	0.05	0.09
04-05-2021 22:45:00	5.04917	0	5.08	30	0	0.0124479	0	0	504123	0.05	0.09
04-05-2021 22:46:00	5.06583	0	5.08	30	0	0.0124479	0	0	504123	0.05	0.09
04-05-2021 22:47:00	5.0825	0	5.08	30	0	0.0124479	0	0	504123	0.05	0.09
04-05-2021 22:48:00	5.09917	0	5.08	30	0	0.0124479	0	0	504123	0.05	0.09
04-05-2021 22:49:00	5.11583	0	5.08	30	0	0.0124479	0	0	504123	0.05	0.09
04-05-2021 22:50:00	5.1325	0	5.08	30	0	0.0124479	0	0	504123	0.05	0.09
04-05-2021 22:51:00	5.14917	0	5.08	30	0	0.0124479	0	0	504123	0.05	0.09
04-05-2021 22:52:00	5.16583	0	5.08	30	0	0.0124479	0	0	504123	0.05	0.09
04-05-2021 22:53:00	5.1825	0	5.08	30	0	0.0124479	0	0	504123	0.05	0.09
04-05-2021 22:54:00	5.19917	0	5.08	30	0	0.0124479	0	0	504123	0.05	0.09
04-05-2021 22:55:00	5.21583	0	5.08	30	0	0.0124479	0	0	504123	0.05	0.09
04-05-2021 22:56:00	5.2325	0	5.08	30	0	0.0124479	0	0	504123	0.05	0.09
04-05-2021 22:57:00	5.24917	0	5.08	30	0	0.0124479	0	0	504123	0.05	0.09
04-05-2021 22:58:00	5.26583	0	5.08	30	0	0.0124479	0	0	504123	0.05	0.09
04-05-2021 22:59:00	5.2825	0	5.08	30	0	0.0124479	0	0	504123	0.05	0.09
04-05-2021 23:00:00	5.29917	0	5.07	30	0	0.0124479	0	0	504123	0.05	0.09
04-05-2021 23:01:00	5.31583	0	5.07	30	0	0.0124479	0	0	504123	0.05	0.09
04-05-2021 23:02:00	5.3325	0	5.07	30	0	0.0124479	0	0	504123	0.05	0.09
04-05-2021 23:03:00	5.34917	0	5.07	30	0	0.0124479	0	0	504123	0.05	0.09
04-05-2021 23:04:00	5.36583	0	5.07	30	0	0.0124479	0	0	504123	0.05	0.09
04-05-2021 23:05:00	5.3825	0	5.07	30	0	0.0124479	0	0	504123	0.05	0.09
04-05-2021 23:06:00	5.39917	0	5.07	30	0	0.0124479	0	0	504123	0.05	0.09
04-05-2021 23:07:00	5.41583	0	5.07	30	0	0.0124479	0	0	504123	0.05	0.09
04-05-2021 23:08:00	5.4325	0	5.07	30	0	0.0124479	0	0	504123	0.05	0.09
04-05-2021 23:09:00	5.44917	0	5.07	30	0	0.0124479	0	0	504123	0.05	0.09
04-05-2021 23:10:00	5.46583	0	5.07	30	0	0.0124479	0	0	504123	0.05	0.09
04-05-2021 23:11:00	5.4825	0	5.07	30	0	0.0124479	0	0	504123	0.05	0.09
04-05-2021 23:12:00	5.49917	0	5.07	30	0	0.0124479	0	0	504123	0.05	0.09
04-05-2021 23:13:00	5.51583	0	5.07	30	0	0.0124479	0	0	504123	0.05	0.09
04-05-2021 23:14:00	5.5325	0	5.07	30	0	0.0124479	0	0	504123	0.05	0.09
04-05-2021 23:15:00	5.54917	0	5.07	30	0	0.0124479	0	0	504123	0.05	0.09
04-05-2021 23:16:00	5.56583	0	5.07	30	0	0.0124479	0	0	504123	0.05	0.09
04-05-2021 23:17:00	5.5825	0	5.07	30	0	0.0124479	0	0	504123	0.05	0.09
04-05-2021 23:18:00	5.59917	0	5.07	30	0	0.0124479	0	0	504123	0.05	0.09
04-05-2021 23:19:00	5.61583	0	5.07	30	0	0.0124479	0	0	504123	0.06	0.08
04-05-2021 23:20:00	5.6325	0	5.06	30	0	0.0124479	0	0	504123	0.06	0.08
04-05-2021 23:21:00	5.64917	0	5.06	30	0	0.0124479	0	0	504123	0.06	0.08
04-05-2021 23:22:00	5.66583	0	5.06	30	0	0.0124479	0	0	504123	0.06	0.08
04-05-2021 23:23:00	5.6825	0	5.06	30	0	0.0124479	0	0	504123	0.06	0.08
04-05-2021 23:24:00	5.69917	0	5.06	30	0	0.0124479	0	0	504123	0.06	0.08
04-05-2021 23:25:00	5.71583	0	5.06	30	0	0.0124479	0	0	504123	0.06	0.08
04-05-2021 23:26:00	5.7325	0	5.06	30	0	0.0124479	0	0	504123	0.06	0.08
04-05-2021 23:27:00	5.74917	0	5.06	30	0	0.0124479	0	0	504123	0.06	0.08
04-05-2021 23:28:00	5.76583	0	5.06	30	0	0.0124479	0	0	504123	0.06	0.08
04-05-2021 23:29:00	5.7825	0	5.06	30	0	0.0124479	0	0	504123	0.06	0.08
04-05-2021 23:30:00	5.79917	0	5.06	30	0	0.0124479	0	0	504123	0.06	0.08
04-05-2021 23:31:00	5.81583	0	5.06	30	0	0.0124479	0	0	504123	0.06	0.08
04-05-2021 23:32:00	5.8325	0	5.06	30	0	0.0124479	0	0	504123	0.06	0.08
04-05-2021 23:33:00	5.84917	0	5.06	30	0	0.0124479	0	0	504123	0.06	0.08
04-05-2021 23:34:00	5.86583	0	5.06	30	0	0.0124479	0	0	504123	0.06	0.08
04-05-2021 23:35:00	5.8825	0	5.06	30	0	0.0124479	0	0	504123	0.06	0.08
04-05-2021 23:36:00	5.89917	0	5.06	30	0	0.0124479	0	0	504123	0.06	0.1
04-05-2021 23:37:00	5.91583	0	5.06	30	0	0.0124479	0	0	504123	0.06	0.1
04-05-2021 23:38:00	5.9325	0	5.06	30	0	0.0124479	0	0	504123	0.06	0.1
04-05-2021 23:39:00	5.94917	0	5.05	30	0	0.0124479	0	0	504123	0.06	0.1
04-05-2021 23:40:00	5.96583	0	5.05	30	0	0.0124479	0	0	504123	0.06	0.1
04-05-2021 23:41:00	5.9825	0	5.05	30	0	0.0124479	0	0	504123	0.06	0.1
04-05-2021 23:42:00	5.99917	0	5.05	30	0	0.0124479	0	0	504123	0.06	0.1
04-05-2021 23:43:00	6.01583	0	5.05	30	0	0.0124479	0	0	504123	0.06	0.1
04-05-2021 23:44:00	6.0325	0	5.05	30	0	0.0124479	0	0	504123	0.06	0.1
04-05-2021 23:45:00	6.04917	0	5.05	30	0	0.0124479	0	0	504123	0.06	0.1
04-05-2021 23:46:00	6.06583	0	5.05	30	0	0.0124479	0	0	504123	0.06	0.1
04-05-2021 23:47:00	6.0825	0	5.05	30	0	0.0124479	0	0	504123	0.06	0.1
04-05-2021 23:48:00	6.09917	0	5.05	30	0	0.0124479	0	0	504123	0.06	0.1
04-05-2021 23:49:00	6.11583	0	5.05	30	0	0.0124479	0	0	504123	0.06	0.1
04-05-2021 23:50:00	6.1325	0	5.05	30	0	0.0124479	0	0	504123	0.06	0.1
04-05-2021 23:51:00	6.14917	0	5.05	30	0	0.0124479	0	0	504123	0.06	0.1
04-05-2021 23:52:00	6.16583	0	5.05	30	0	0.0124479	0	0	504123	0.06	0.1
04-05-2021 23:53:00	6.1825	0	5.05	30	0	0.0124479	0	0	504123	0.06	0.1
04-05-2021 23:54:00	6.19917	0	5.05	30	0	0.0124479	0	0	504123	0.06	0.09
04-05-2021 23:55:00	6.21583	0	5.05	30	0	0.0124479	0	0	504123	0.06	0.09
04-05-2021 23:56:00	6.2325	0	5.05	30	0	0.0124479	0	0	504123	0.06	0.09
04-05-2021 23:57:00	6.24917	0	5.04	30	0	0.0124479	0	0	504123	0.06	0.09
04-05-2021 23:58:00	6.26583	0	5.04	30	0	0.0124479	0	0	504123	0.06	0.09
04-05-2021 23:59:00	6.2825	0	5.04	30	0	0.0124479	0	0	504123	0.06	0.09
05-05-2021 00:00:00	6.29917	0	5.04	30	0	0.0124479	0	0	504123	0.06	0.09
05-05-2021 00:01:00	6.31583	0	5.04	30	0	0.0124479	0	0	504123	0.06	0.09
05-05-2021 00:02:00	6.3325	0	5.04	30	0	0.0124479	0	0	504123	0.06	0.09
05-05-2021 00:03:00	6.34917	0	5.04	30	0	0.0124479	0	0	504123	0.06	0.09
05-05-2021 00:04:00	6.36583	0	5.04	30	0	0.0124479	0	0	504123	0.06	0.09
05-05-2021 00:05:00	6.3825	0	5.04	30	0	0.0124479	0	0	504123	0.06	0.09
05-05-2021 00:06:00	6.39917	0	5.04	30	0	0.0124479	0	0	504123	0.06	0.09
05-05-2021 00:07:00	6.41583	0	5.04	30	0	0.0124479	0	0	504123	0.06	0.09
05-05-2021 00:08:00	6.4325	0	5.04	30	0	0.0124479	0	0	504123	0.06	0.09
05-05-2021 00:09:00	6.44917	0	5.04	30	0	0.0124479	0	0	504123	0.06	0.09
05-05-2021 00:10:00	6.46583	0	5.04	30	0	0.0124479	0	0	504123	0.06	0.09
05-05-2021 00:11:00	6.4825	0	5.04	30	0	0.0124479	0	0	504123	0.06	0.09
05-05-2021 00:12:00	6.49917	0	5.04	30	0	0.0124479	0	0	504123	0.06	0.07
05-05-2021 00:13:00	6.51583	0	5.06	30	0	0.0124479	0	0	504123	0.06	0.07
05-05-2021 00:14:00	6.5325	0	5.05	30	0	0.0124479	0	0	504123	0.06	0.07
05-05-2021 00:15:00	6.54917	0	5.05	30	0	0.0124479	0	0	504123	0.06	0.07
05-05-2021 00:16:00	6.56583	0	5.05	30	0	0.0124479	0	0	504123	0.06	0.07
05-05-2021 00:17:00	6.5825	0	5.05	30	0	0.0124479	0	0	504123	0.06	0.07
05-05-2021 00:18:00	6.59917	0	5.05	30	0	0.0124479	0	0	504123	0.06	0.07
05-05-2021 00:19:00	6.61583	0	5.05	30	0	0.0124479	0	0	504123	0.06	0.07
05-05-2021 00:20:00	6.6325	0	5.05	30	0	0.0124479	0	0	504123	0.06	0.07
05-05-2021 00:21:00	6.64917	0	5.05	30	0	0.0124479	0	0	504123	0.06	0.07
05-05-2021 00:22:00	6.66583	0	5.05	30	0	0.0124479	0	0	504123	0.06	0.07
05-05-2021 00:23:00	6.6825	0	5.05	30	0	0.0124479	0	0	504123	0.06	0.07
05-05-2021 00:24:00	6.69917	0	5.05	30	0	0.0124479	0	0	504123	0.06	0.07
05-05-2021 00:25:00	6.71583	0	5.05	30	0	0.0124479	0	0	504123	0.06	0.07
05-05-2021 00:26:00	6.7325	0	5.05	30	0	0.0124479	0	0	504123	0.06	0.07
05-05-2021 00:27:00	6.74917	0	5.05	30	0	0.0124479	0	0	504123	0.06	0.07
05-05-2021 00:28:00	6.76583	0	5.05	30	0	0.0124479	0	0	504123	0.06	0.07
05-05-2021 00:29:00	6.7825	0	5.05	30	0	0.0124479	0	0	504123	0.07	0.08
05-05-2021 00:30:00	6.79917	0	5.05	30	0	0.0124479	0	0	504123	0.07	0.08
05-05-2021 00:31:00	6.81583	0	5.04	30	0	0.0124479	0	0	504123	0.07	0.08
05-05-2021 00:32:00	6.8325	0	5.04	30	0	0.0124479	0	0	504123	0.07	0.08
05-05-2021 00:33:00	6.84917	0	5.04	30	0	0.0124479	0	0	504123	0.07	0.08
05-05-2021 00:34:00	6.86583	0	5.04	30	0	0.0124479	0	0	504123	0.07	0.08
05-05-2021 00:35:00	6.8825	0	5.04	30	0	0.0124479	0	0	504123	0.07	0.08
05-05-2021 00:36:00	6.89917	0	5.04	30	0	0.0124479	0	0	504123	0.07	0.08
05-05-2021 00:37:00	6.91583	0	5.04	30	0	0.0124479	0	0	504123	0.07	0.08
05-05-2021 00:38:00	6.9325	0	5.04	30	0	0.0124479	0	0	504123	0.07	0.08
05-05-2021 00:39:00	6.94917	0	5.04	30	0	0.0124479	0	0	504123	0.07	0.08
05-05-2021 00:40:00	6.96583	0	5.04	30	0	0.0124479	0	0	504123	0.07	0.08
05-05-2021 00:41:00	6.9825	0	5.04	30	0	0.0124479	0	0	504123	0.07	0.08
05-05-2021 00:42:00	6.99917	0	5.04	30	0	0.0124479	0	0	504123	0.07	0.08
05-05-2021 00:43:00	7.01583	0	5.04	30	0	0.0124479	0	0	504123	0.07	0.08
05-05-2021 00:44:00	7.0325	0	5.04	30	0	0.0124479	0	0	504123	0.07	0.08
05-05-2021 00:45:00	7.04917	0	5.04	30	0	0.0124479	0	0	504123	0.07	0.08
05-05-2021 00:46:00	7.06583	0	5.04	30	0	0.0124479	0	0	504123	0.07	0.09
05-05-2021 00:47:00	7.0825	0	5.03	30	0	0.0124479	0	0	504123	0.07	0.09
05-05-2021 00:48:00	7.09917	0	5.03	30	0	0.0124479	0	0	504123	0.07	0.09
05-05-2021 00:49:00	7.11583	0	5.03	30	0	0.0124479	0	0	504123	0.07	0.09
05-05-2021 00:50:00	7.1325	0	5.03	30	0	0.0124479	0	0	504123	0.07	0.09
05-05-2021 00:51:00	7.14917	0	5.03	30	0	0.0124479	0	0	504123	0.07	0.09
05-05-2021 00:52:00	7.16583	0	5.03	30	0	0.0124479	0	0	504123	0.07	0.09
05-05-2021 00:53:00	7.1825	0	5.03	30	0	0.0124479	0	0	504123	0.07	0.09
05-05-2021 00:54:00	7.19917	0	5.03	30	0	0.0124479	0	0	504123	0.07	0.09
05-05-2021 00:55:00	7.21583	0	5.03	30	0	0.0124479	0	0	504123	0.07	0.09
05-05-2021 00:56:00	7.2325	0	5.03	30	0	0.0124479	0	0	504123	0.07	0.09
05-05-2021 00:57:00	7.24917	0	5.03	30	0	0.0124479	0	0	504123	0.07	0.09
05-05-2021 00:58:00	7.26583	0	5.03	30	0	0.0124479	0	0	504123	0.07	0.09
05-05-2021 00:59:00	7.2825	0	5.03	30	0	0.0124479	0	0	504123	0.07	0.09
05-05-2021 01:00:00	7.29917	0	5.03	30	0	0.0124479	0	0	504123	0.07	0.09
05-05-2021 01:01:00	7.31583	0	5.03	30	0	0.0124479	0	0	504123	0.07	0.09
05-05-2021 01:02:00	7.3325	0	5.02	30	0	0.0124479	0	0	504123	0.07	0.09
05-05-2021 01:03:00	7.34917	0	5.02	30	0	0.0124479	0	0	504123	0.07	0.09
05-05-2021 01:04:00	7.36583	0	5.02	30	0	0.0124479	0	0	504123	0.07	0.08
05-05-2021 01:05:00	7.3825	0	5.02	30	0	0.0124479	0	0	504123	0.07	0.08
05-05-2021 01:06:00	7.39917	0	5.02	30	0	0.0124479	0	0	504123	0.07	0.08
05-05-2021 01:07:00	7.41583	0	5.02	30	0	0.0124479	0	0	504123	0.07	0.08
05-05-2021 01:08:00	7.4325	0	5.02	30	0	0.0124479	0	0	504123	0.07	0.08
05-05-2021 01:09:00	7.44917	0	5.02	30	0	0.0124479	0	0	504123	0.07	0.08
05-05-2021 01:10:00	7.46583	0	5.02	30	0	0.0124479	0	0	504123	0.07	0.08
05-05-2021 01:11:00	7.4825	0	5.02	30	0	0.0124479	0	0	504123	0.07	0.08
05-05-2021 01:12:00	7.49917	0	5.02	30	0	0.0124479	0	0	504123	0.07	0.08
05-05-2021 01:13:00	7.51583	0	5.02	30	0	0.0124479	0	0	504123	0.07	0.08
05-05-2021 01:14:00	7.5325	0	5.02	30	0	0.0124479	0	0	504123	0.07	0.08
05-05-2021 01:15:00	7.54917	0	5.02	30	0	0.0124479	0	0	504123	0.07	0.08
05-05-2021 01:16:00	7.56583	0	5.01	30	0	0.0124479	0	0	504123	0.07	0.08
05-05-2021 01:17:00	7.5825	0	5.01	30	0	0.0124479	0	0	504123	0.07	0.08
05-05-2021 01:18:00	7.59917	0	5.01	30	0	0.0124479	0	0	504123	0.07	0.08
05-05-2021 01:19:00	7.61583	0	5.01	30	0	0.0124479	0	0	504123	0.07	0.08
05-05-2021 01:20:00	7.6325	0	5.01	30	0	0.0124479	0	0	504123	0.07	0.08
05-05-2021 01:21:00	7.64917	0	5.01	30	0	0.0124479	0	0	504123	0.08	0.08
05-05-2021 01:22:00	7.66583	0	5.01	30	0	0.0124479	0	0	504123	0.08	0.08
05-05-2021 01:23:00	7.6825	0	5.01	30	0	0.0124479	0	0	504123	0.08	0.08
05-05-2021 01:24:00	7.69917	0	5.01	30	0	0.0124479	0	0	504123	0.08	0.08
05-05-2021 01:25:00	7.71583	0	5.01	30	0	0.0124479	0	0	504123	0.08	0.08
05-05-2021 01:26:00	7.7325	0	5.01	30	0	0.0124479	0	0	504123	0.08	0.08
05-05-2021 01:27:00	7.74917	0	5.01	30	0	0.0124479	0	0	504123	0.08	0.08
05-05-2021 01:28:00	7.76583	0	5.01	30	0	0.0124479	0	0	504123	0.08	0.08
05-05-2021 01:29:00	7.7825	0	5.01	30	0	0.0124479	0	0	504123	0.08	0.08
05-05-2021 01:30:00	7.79917	0	5	30	0	0.0124479	0	0	504123	0.08	0.08
05-05-2021 01:31:00	7.81583	0	5	30	0	0.0124479	0	0	504123	0.08	0.08
05-05-2021 01:32:00	7.8325	0	5	30	0	0.0124479	0	0	504123	0.08	0.08
05-05-2021 01:33:00	7.84917	0	5	30	0	0.0124479	0	0	504123	0.08	0.08
05-05-2021 01:34:00	7.86583	0	5	30	0	0.0124479	0	0	504123	0.08	0.08
05-05-2021 01:35:00	7.8825	0	5	30	0	0.0124479	0	0	504123	0.08	0.08
05-05-2021 01:36:00	7.89917	0	5	30	0	0.0124479	0	0	504123	0.08	0.08
05-05-2021 01:37:00	7.91583	0	5	30	0	0.0124479	0	0	504123	0.08	0.08
05-05-2021 01:38:00	7.9325	0	5	30	0	0.0124479	0	0	504123	0.08	0.08
05-05-2021 01:39:00	7.94917	0	5	30	0	0.0124479	0	0	504123	0.08	0.08
05-05-2021 01:40:00	7.96583	0	5	30	0	0.0124479	0	0	504123	0.08	0.08
05-05-2021 01:41:00	7.9825	0	5	30	0	0.0124479	0	0	504123	0.08	0.08
05-05-2021 01:42:00	7.99917	0	5	30	0	0.0124479	0	0	504123	0.08	0.08
05-05-2021 01:43:00	8.01583	0	4.99	30	0	0.0124479	0	0	504123	0.08	0.08
05-05-2021 01:44:00	8.0325	0	4.99	30	0	0.0124479	0	0	504123	0.08	0.08
05-05-2021 01:45:00	8.04917	0	4.99	30	0	0.0124479	0	0	504123	0.08	0.08
05-05-2021 01:46:00	8.06583	0	4.99	30	0	0.0124479	0	0	504123	0.08	0.08
05-05-2021 01:47:00	8.0825	0	4.99	30	0	0.0124479	0	0	504123	0.08	0.08
05-05-2021 01:48:00	8.09917	0	4.99	30	0	0.0124479	0	0	504123	0.08	0.08
05-05-2021 01:49:00	8.11583	0	4.99	30	0	0.0124479	0	0	504123	0.08	0.08
05-05-2021 01:50:00	8.1325	0	4.99	30	0	0.0124479	0	0	504123	0.08	0.08
05-05-2021 01:51:00	8.14917	0	4.99	30	0	0.0124479	0	0	504123	0.08	0.08
05-05-2021 01:52:00	8.16583	0	4.99	30	0	0.0124479	0	0	504123	0.08	0.08
05-05-2021 01:53:00	8.1825	0	4.99	30	0	0.0124479	0	0	504123	0.08	0.08
05-05-2021 01:54:00	8.19917	0	4.99	30	0	0.0124479	0	0	504123	0.08	0.08
05-05-2021 01:55:00	8.21583	0	4.98	30	0	0.0124479	0	0	504123	0.08	0.08
05-05-2021 01:56:00	8.2325	0	4.98	30	0	0.0124479	0	0	504123	0.08	0.08
05-05-2021 01:57:00	8.24917	0	4.98	30	0	0.0124479	0	0	504123	0.08	0.08
05-05-2021 01:58:00	8.26583	0	4.98	30	0	0.0124479	0	0	504123	0.08	0.08
05-05-2021 01:59:00	8.2825	0	4.98	30	0	0.0124479	0	0	504123	0.08	0.08
05-05-2021 02:00:00	8.29917	0	4.98	30	0	0.0124479	0	0	504123	0.08	0.08
05-05-2021 02:01:00	8.31583	0	4.98	30	0	0.0124479	0	0	504123	0.08	0.08
05-05-2021 02:02:00	8.3325	0	4.98	30	0	0.0124479	0	0	504123	0.08	0.08
05-05-2021 02:03:00	8.34917	0	4.98	30	0	0.0124479	0	0	504123	0.08	0.08
05-05-2021 02:04:00	8.36583	0	4.98	30	0	0.0124479	0	0	504123	0.08	0.08
05-05-2021 02:05:00	8.3825	0	4.98	30	0	0.0124479	0	0	504123	0.08	0.08
05-05-2021 02:06:00	8.39917	0	4.98	30	0	0.0124479	0	0	504123	0.08	0.08
05-05-2021 02:07:00	8.41583	0	4.98	30	0	0.0124479	0	0	504123	0.08	0.08
05-05-2021 02:08:00	8.4325	0	4.97	30	0	0.0124479	0	0	504123	0.08	0.08
05-05-2021 02:09:00	8.44917	0	4.97	30	0	0.0124479	0	0	504123	0.08	0.08
05-05-2021 02:10:00	8.46583	0	4.97	30	0	0.0124479	0	0	504123	0.08	0.08
05-05-2021 02:11:00	8.4825	0	4.97	30	0	0.0124479	0	0	504123	0.08	0.08
05-05-2021 02:12:00	8.49917	0	4.97	30	0	0.0124479	0	0	504123	0.08	0.08
05-05-2021 02:13:00	8.51583	0	4.97	30	0	0.0124479	0	0	504123	0.08	0.08
05-05-2021 02:14:00	8.5325	0	4.97	30	0	0.0124479	0	0	504123	0.09	0.09
05-05-2021 02:15:00	8.54917	0	4.97	30	0	0.0124479	0	0	504123	0.09	0.09
05-05-2021 02:16:00	8.56583	0	4.97	30	0	0.0124479	0	0	504123	0.09	0.09
05-05-2021 02:17:00	8.5825	0	4.97	30	0	0.0124479	0	0	504123	0.09	0.09
05-05-2021 02:18:00	8.59917	0	4.97	30	0	0.0124479	0	0	504123	0.09	0.09
05-05-2021 02:19:00	8.61583	0	4.96	30	0	0.0124479	0	0	504123	0.09	0.09
05-05-2021 02:20:00	8.6325	0	4.96	30	0	0.0124479	0	0	504123	0.09	0.09
05-05-2021 02:21:00	8.64917	0	4.96	30	0	0.0124479	0	0	504123	0.09	0.09
05-05-2021 02:22:00	8.66583	0	4.96	30	0	0.0124479	0	0	504123	0.09	0.09
05-05-2021 02:23:00	8.6825	0	4.96	30	0	0.0124479	0	0	504123	0.09	0.09
05-05-2021 02:24:00	8.69917	0	4.96	30	0	0.0124479	0	0	504123	0.09	0.09
05-05-2021 02:25:00	8.71583	0	4.96	30	0	0.0124479	0	0	504123	0.09	0.09
05-05-2021 02:26:00	8.7325	0	4.96	30	0	0.0124479	0	0	504123	0.09	0.09
05-05-2021 02:27:00	8.74917	0	4.96	30	0	0.0124479	0	0	504123	0.09	0.09
05-05-2021 02:28:00	8.76583	0	4.96	30	0	0.0124479	0	0	504123	0.09	0.09
05-05-2021 02:29:00	8.7825	0	4.96	30	0	0.0124479	0	0	504123	0.09	0.09
05-05-2021 02:30:00	8.79917	0	4.95	30	0	0.0124479	0	0	504123	0.09	0.09
05-05-2021 02:31:00	8.81583	0	4.95	30	0	0.0124479	0	0	504123	0.09	0.09
05-05-2021 02:32:00	8.8325	0	4.95	30	0	0.0124479	0	0	504123	0.1	0.08
05-05-2021 02:33:00	8.84917	0	4.95	30	0	0.0124479	0	0	504123	0.1	0.08
05-05-2021 02:34:00	8.86583	0	4.95	30	0	0.0124479	0	0	504123	0.1	0.08
05-05-2021 02:35:00	8.8825	0	4.99	30	0	0.0124479	0	0.3	504123	0.1	0.08
05-05-2021 02:36:00	8.89917	0	4.99	30	0	0.0124479	0	0.3	504123	0.1	0.08
05-05-2021 02:37:00	8.91583	0	4.99	30	0	0.0124479	0	0.3	504123	0.1	0.08
05-05-2021 02:38:00	8.9325	0	4.99	30	0	0.0124479	0	0.3	504123	0.1	0.08
05-05-2021 02:39:00	8.94917	0	4.99	30	0	0.0124479	0	0.3	504123	0.1	0.08
05-05-2021 02:40:00	8.96583	0	4.99	30	0	0.0124479	0	0.3	504123	0.1	0.08
05-05-2021 02:41:00	8.9825	0	4.99	30	0	0.0124479	0	0.3	504123	0.1	0.08
05-05-2021 02:42:00	8.99917	0	4.99	30	0	0.0124479	0	0.3	504123	0.1	0.08
05-05-2021 02:43:00	9.01583	0	4.99	30	0	0.0124479	0	0.3	504123	0.1	0.08
05-05-2021 02:44:00	9.0325	0	4.99	30	0	0.0124479	0	0.3	504123	0.1	0.08
05-05-2021 02:45:00	9.04917	0	4.98	30	0	0.0124479	0	0.3	504123	0.1	0.08
05-05-2021 02:46:00	9.06583	0	4.98	30	0	0.0124479	0	0.3	504123	0.1	0.08
05-05-2021 02:47:00	9.0825	0	4.98	30	0	0.0124479	0	0.3	504123	0.1	0.08
05-05-2021 02:48:00	9.09917	0	4.98	30	0	0.0124479	0	0.3	504123	0.1	0.08
05-05-2021 02:49:00	9.11583	0	4.98	30	0	0.0124479	0	0.3	504123	0.1	0.08
05-05-2021 02:50:00	9.1325	0	4.98	30	0	0.0124479	0	0.3	504123	0.1	0.08
05-05-2021 02:51:00	9.14917	0	4.98	30	0	0.0124479	0	0.3	504123	0.1	0.08
05-05-2021 02:52:00	9.16583	0	4.98	30	0	0.0124479	0	0.3	504123	0.1	0.08
05-05-2021 02:53:00	9.1825	0	4.98	30	0	0.0124479	0	0.3	504123	0.1	0.08
05-05-2021 02:54:00	9.19917	0	4.98	30	0	0.0124479	0	0.3	504123	0.1	0.08
05-05-2021 02:55:00	9.21583	0	4.98	30	0	0.0124479	0	0.3	504123	0.1	0.08
05-05-2021 02:56:00	9.2325	0	4.97	30	0	0.0124479	0	0.3	504123	0.1	0.08
05-05-2021 02:57:00	9.24917	0	4.97	30	0	0.0124479	0	0.3	504123	0.1	0.08
05-05-2021 02:58:00	9.26583	0	4.97	30	0	0.0124479	0	0.3	504123	0.1	0.08
05-05-2021 02:59:00	9.2825	0	4.97	30	0	0.0124479	0	0.3	504123	0.1	0.08
05-05-2021 03:00:00	9.29917	0	4.97	30	0	0.0124479	0	0.3	504123	0.1	0.08
05-05-2021 03:01:00	9.31583	0	4.97	30	0	0.0124479	0	0.3	504123	0.1	0.08
05-05-2021 03:02:00	9.3325	0	4.97	30	0	0.0124479	0	0.3	504123	0.1	0.08
05-05-2021 03:03:00	9.34917	0	4.97	30	0	0.0124479	0	0.3	504123	0.1	0.08
05-05-2021 03:04:00	9.36583	0	4.97	30	0	0.0124479	0	0.3	504123	0.1	0.08
05-05-2021 03:05:00	9.3825	0	4.97	30	0	0.0124479	0	0.3	504123	0.1	0.08
05-05-2021 03:06:00	9.39917	0	4.96	30	0	0.0124479	0	0.3	504123	0.1	0.08
05-05-2021 03:07:00	9.41583	0	4.96	30	0	0.0124479	0	0.3	504123	0.11	0.08
05-05-2021 03:08:00	9.4325	0	4.96	30	0	0.0124479	0	0.3	504123	0.11	0.08
05-05-2021 03:09:00	9.44917	0	4.96	30	0	0.0124479	0	0.3	504123	0.11	0.08
05-05-2021 03:10:00	9.46583	0	4.96	30	0	0.0124479	0	0.3	504123	0.11	0.08
05-05-2021 03:11:00	9.4825	0	4.96	30	0	0.0124479	0	0.3	504123	0.11	0.08
05-05-2021 03:12:00	9.49917	0	4.96	30	0	0.0124479	0	0.3	504123	0.11	0.08
05-05-2021 03:13:00	9.51583	0	4.96	30	0	0.0124479	0	0.3	504123	0.11	0.08
05-05-2021 03:14:00	9.5325	0	4.96	30	0	0.0124479	0	0.3	504123	0.11	0.08
05-05-2021 03:15:00	9.54917	0	4.96	30	0	0.0124479	0	0.3	504123	0.11	0.08
05-05-2021 03:16:00	9.56583	0	4.95	30	0	0.0124479	0	0.3	504123	0.11	0.08
05-05-2021 03:17:00	9.5825	0	4.95	30	0	0.0124479	0	0.3	504123	0.11	0.08
05-05-2021 03:18:00	9.59917	0	4.95	30	0	0.0124479	0	0.3	504123	0.11	0.08
05-05-2021 03:19:00	9.61583	0	4.95	30	0	0.0124479	0	0.3	504123	0.11	0.08
05-05-2021 03:20:00	9.6325	0	4.95	30	0	0.0124479	0	0.4	504123	0.11	0.08
05-05-2021 03:21:00	9.64917	0	4.98	30	0	0.0124479	0	0.6	504123	0.11	0.08
05-05-2021 03:22:00	9.66583	0	4.98	30	0	0.0124479	0	0.6	504123	0.11	0.08
05-05-2021 03:23:00	9.6825	0	4.98	30	0	0.0124479	0	0.6	504123	0.11	0.08
05-05-2021 03:24:00	9.69917	0	4.98	30	0	0.0124479	0	0.6	504123	0.11	0.09
05-05-2021 03:25:00	9.71583	0	4.98	30	0	0.0124479	0	0.6	504123	0.11	0.09
05-05-2021 03:26:00	9.7325	0	4.98	30	0	0.0124479	0	0.6	504123	0.11	0.09
05-05-2021 03:27:00	9.74917	0	4.97	30	0	0.0124479	0	0.6	504123	0.11	0.09
05-05-2021 03:28:00	9.76583	0	4.97	30	0	0.0124479	0	0.6	504123	0.11	0.09
05-05-2021 03:29:00	9.7825	0	4.97	30	0	0.0124479	0	0.6	504123	0.11	0.09
05-05-2021 03:30:00	9.79917	0	4.97	30	0	0.0124479	0	0.6	504123	0.11	0.09
05-05-2021 03:31:00	9.81583	0	4.97	30	0	0.0124479	0	0.6	504123	0.11	0.09
05-05-2021 03:32:00	9.8325	0	4.97	30	0	0.0124479	0	0.6	504123	0.11	0.09
05-05-2021 03:33:00	9.84917	0	4.97	30	0	0.0124479	0	0.6	504123	0.11	0.09
05-05-2021 03:34:00	9.86583	0	4.97	30	0	0.0124479	0	0.6	504123	0.11	0.09
05-05-2021 03:35:00	9.8825	0	4.97	30	0	0.0124479	0	0.6	504123	0.11	0.09
05-05-2021 03:36:00	9.89917	0	4.96	30	0	0.0124479	0	0.6	504123	0.11	0.09
05-05-2021 03:37:00	9.91583	0	4.96	30	0	0.0124479	0	0.6	504123	0.11	0.09
05-05-2021 03:38:00	9.9325	0	4.96	30	0	0.0124479	0	0.6	504123	0.11	0.09
05-05-2021 03:39:00	9.94917	0	4.96	30	0	0.0124479	0	0.6	504123	0.11	0.09
05-05-2021 03:40:00	9.96583	0	4.96	30	0	0.0124479	0	0.6	504123	0.11	0.09
05-05-2021 03:41:00	9.9825	0	4.96	30	0	0.0124479	0	0.6	504123	0.11	0.09
05-05-2021 03:42:00	9.99917	0	4.96	30	0	0.0124479	0	0.6	504123	0.12	0.09
05-05-2021 03:43:00	10.0158	0	4.96	30	0	0.0124479	0	0.6	504123	0.12	0.09
05-05-2021 03:44:00	10.0325	0	4.96	30	0	0.0124479	0	0.6	504123	0.12	0.09
05-05-2021 03:45:00	10.0492	0	4.95	30	0	0.0124479	0	0.6	504123	0.12	0.09
05-05-2021 03:46:00	10.0658	0	4.95	30	0	0.0124479	0	0.6	504123	0.12	0.09
05-05-2021 03:47:00	10.0825	0	4.95	30	0	0.0124479	0	0.6	504123	0.12	0.09
05-05-2021 03:48:00	10.0992	0	4.95	30	0	0.0124479	0	0.6	504123	0.12	0.09
05-05-2021 03:49:00	10.1158	0	4.95	30	0	0.0124479	0	0.6	504123	0.12	0.09
05-05-2021 03:50:00	10.1325	0	5.02	30	0	0.0124479	0	1.3	504123	0.12	0.09
05-05-2021 03:51:00	10.1492	0	5.02	30	0	0.0124479	0	1.3	504123	0.12	0.09
05-05-2021 03:52:00	10.1658	0	5.02	30	0	0.0124479	0	1.3	504123	0.12	0.09
05-05-2021 03:53:00	10.1825	0	5.02	30	0	0.0124479	0	1.3	504123	0.12	0.09
05-05-2021 03:54:00	10.1992	0	5.02	30	0	0.0124479	0	1.3	504123	0.12	0.09
05-05-2021 03:55:00	10.2158	0	5.02	30	0	0.0124479	0	1.3	504123	0.12	0.09
05-05-2021 03:56:00	10.2325	0	5.02	30	0	0.0124479	0	1.3	504123	0.12	0.09
05-05-2021 03:57:00	10.2492	0	5.01	30	0	0.0124479	0	1.3	504123	0.12	0.09
05-05-2021 03:58:00	10.2658	0	5.01	30	0	0.0124479	0	1.3	504123	0.12	0.09
05-05-2021 03:59:00	10.2825	0	5.01	30	0	0.0124479	0	1.3	504123	0.12	0.08
05-05-2021 04:00:00	10.2992	0	5.01	30	0	0.0124479	0	1.3	504123	0.12	0.08
05-05-2021 04:01:00	10.3158	0	5.01	30	0	0.0124479	0	1.3	504123	0.12	0.08
05-05-2021 04:02:00	10.3325	0	5.01	30	0	0.0124479	0	1.3	504123	0.12	0.08
05-05-2021 04:03:00	10.3492	0	5.01	30	0	0.0124479	0	1.3	504123	0.12	0.08
05-05-2021 04:04:00	10.3658	0	5.01	30	0	0.0124479	0	1.3	504123	0.12	0.08
05-05-2021 04:05:00	10.3825	0	5.01	30	0	0.0124479	0	1.3	504123	0.12	0.08
05-05-2021 04:06:00	10.3992	0	5	30	0	0.0124479	0	1.3	504123	0.12	0.08
05-05-2021 04:07:00	10.4158	0	5	30	0	0.0124479	0	1.3	504123	0.12	0.08
05-05-2021 04:08:00	10.4325	0	5	30	0	0.0124479	0	1.3	504123	0.12	0.08
05-05-2021 04:09:00	10.4492	0	5	30	0	0.0124479	0	1.3	504123	0.12	0.08
05-05-2021 04:10:00	10.4658	0	5	30	0	0.0124479	0	1.3	504123	0.12	0.08
05-05-2021 04:11:00	10.4825	0	5	30	0	0.0124479	0	1.3	504123	0.12	0.08
05-05-2021 04:12:00	10.4992	0	5	30	0	0.0124479	0	1.3	504123	0.12	0.08
05-05-2021 04:13:00	10.5158	0	5	30	0	0.0124479	0	1.3	504123	0.12	0.08
05-05-2021 04:14:00	10.5325	0	5	30	0	0.0124479	0	1.3	504123	0.12	0.08
05-05-2021 04:15:00	10.5492	0	4.99	30	0	0.0124479	0	1.3	504123	0.12	0.08
05-05-2021 04:16:00	10.5658	0	4.99	30	0	0.0124479	0	1.3	504123	0.12	0.08
05-05-2021 04:17:00	10.5825	0	4.99	30	0	0.0124479	0	1.3	504123	0.13	0.09
05-05-2021 04:18:00	10.5992	0	4.99	30	0	0.0124479	0	1.3	504123	0.13	0.09
05-05-2021 04:19:00	10.6158	0	4.99	30	0	0.0124479	0	1.3	504123	0.13	0.09
05-05-2021 04:20:00	10.6325	0	4.99	30	0	0.0124479	0	1.3	504123	0.13	0.09
05-05-2021 04:21:00	10.6492	0	4.99	30	0	0.0124479	0	1.3	504123	0.13	0.09
05-05-2021 04:22:00	10.6658	0	4.99	30	0	0.0124479	0	1.3	504123	0.13	0.09
05-05-2021 04:23:00	10.6825	0	4.98	30	0	0.0124479	0	1.3	504123	0.13	0.09
05-05-2021 04:24:00	10.6992	0	4.98	30	0	0.0124479	0	1.3	504123	0.13	0.09
05-05-2021 04:25:00	10.7158	0	4.98	30	0	0.0124479	0	1.3	504123	0.13	0.09
05-05-2021 04:26:00	10.7325	0	4.98	30	0	0.0124479	0	1.3	504123	0.13	0.09
05-05-2021 04:27:00	10.7492	0	4.98	30	0	0.0124479	0	1.3	504123	0.13	0.09
05-05-2021 04:28:00	10.7658	0	4.98	30	0	0.0124479	0	1.3	504123	0.13	0.09
05-05-2021 04:29:00	10.7825	0	4.98	30	0	0.0124479	0	1.3	504123	0.13	0.09
05-05-2021 04:30:00	10.7992	0	4.98	30	0	0.0124479	0	1.3	504123	0.13	0.09
05-05-2021 04:31:00	10.8158	0	4.97	30	0	0.0124479	0	1.3	504123	0.13	0.09
05-05-2021 04:32:00	10.8325	0	4.97	30	0	0.0124479	0	1.3	504123	0.13	0.09
05-05-2021 04:33:00	10.8492	0	4.97	30	0	0.0124479	0	1.3	504123	0.13	0.09
05-05-2021 04:34:00	10.8658	0	4.97	30	0	0.0124479	0	1.3	504123	0.13	0.1
05-05-2021 04:35:00	10.8825	0	4.97	30	0	0.0124479	0	1.3	504123	0.13	0.09
05-05-2021 04:36:00	10.8992	0	4.97	30	0	0.0124479	0	1.3	504123	0.13	0.09
05-05-2021 04:37:00	10.9158	0	4.97	30	0	0.0124479	0	1.3	504123	0.13	0.09
05-05-2021 04:38:00	10.9325	0	4.97	30	0	0.0124479	0	1.3	504123	0.13	0.09
05-05-2021 04:39:00	10.9492	0	4.96	30	0	0.0124479	0	1.3	504123	0.13	0.09
05-05-2021 04:40:00	10.9658	0	4.96	30	0	0.0124479	0	1.3	504123	0.13	0.09
05-05-2021 04:41:00	10.9825	0	4.96	30	0	0.0124479	0	1.3	504123	0.13	0.09
05-05-2021 04:42:00	10.9992	0	4.96	30	0	0.0124479	0	1.3	504123	0.13	0.09
05-05-2021 04:43:00	11.0158	0	4.96	30	0	0.0124479	0	1.3	504123	0.13	0.09
05-05-2021 04:44:00	11.0325	0	4.96	30	0	0.0124479	0	1.3	504123	0.13	0.09
05-05-2021 04:45:00	11.0492	0	4.96	30	0	0.0124479	0	1.3	504123	0.13	0.09
05-05-2021 04:46:00	11.0658	0	4.95	30	0	0.0124479	0	1.3	504123	0.13	0.09
05-05-2021 04:47:00	11.0825	0	4.95	30	0	0.0124479	0	1.3	504123	0.13	0.09
05-05-2021 04:48:00	11.0992	0	4.95	30	0	0.0124479	0	1.3	504123	0.13	0.09
05-05-2021 04:49:00	11.1158	0	4.95	30	0	0.0124479	0	1.3	504123	0.13	0.09
05-05-2021 04:50:00	11.1325	0	4.99	30	0	0.0124479	0	2.3	504123	0.13	0.09
05-05-2021 04:51:00	11.1492	0	5.02	30	0	0.0124479	0	2.3	504123	0.13	0.09
05-05-2021 04:52:00	11.1658	0	5.02	30	0	0.0124479	0	2.3	504123	0.15	0.09
05-05-2021 04:53:00	11.1825	0	5.01	30	0	0.0124479	0	2.3	504123	0.15	0.09
05-05-2021 04:54:00	11.1992	0	5.01	30	0	0.0124479	0	2.3	504123	0.15	0.09
05-05-2021 04:55:00	11.2158	0	5.01	30	0	0.0124479	0	2.3	504123	0.15	0.09
05-05-2021 04:56:00	11.2325	0	5.01	30	0	0.0124479	0	2.3	504123	0.15	0.09
05-05-2021 04:57:00	11.2492	0	5.01	30	0	0.0124479	0	2.3	504123	0.15	0.09
05-05-2021 04:58:00	11.2658	0	5.01	30	0	0.0124479	0	2.3	504123	0.15	0.09
05-05-2021 04:59:00	11.2825	0	5.01	30	0	0.0124479	0	2.3	504123	0.15	0.09
05-05-2021 05:00:00	11.2992	0	5.01	30	0	0.0124479	0	2.3	504123	0.15	0.09
05-05-2021 05:01:00	11.3158	0	5	30	0	0.0124479	0	2.3	504123	0.15	0.09
05-05-2021 05:02:00	11.3325	0	5	30	0	0.0124479	0	2.3	504123	0.15	0.09
05-05-2021 05:03:00	11.3492	0	5	30	0	0.0124479	0	2.3	504123	0.15	0.09
05-05-2021 05:04:00	11.3658	0	5	30	0	0.0124479	0	2.3	504123	0.15	0.09
05-05-2021 05:05:00	11.3825	0	5	30	0	0.0124479	0	2.3	504123	0.15	0.09
05-05-2021 05:06:00	11.3992	0	5	30	0	0.0124479	0	2.3	504123	0.15	0.09
05-05-2021 05:07:00	11.4158	0	5	30	0	0.0124479	0	2.3	504123	0.15	0.09
05-05-2021 05:08:00	11.4325	0	4.99	30	0	0.0124479	0	2.3	504123	0.15	0.09
05-05-2021 05:09:00	11.4492	0	4.99	30	0	0.0124479	0	2.3	504123	0.15	0.07
05-05-2021 05:10:00	11.4658	0	4.99	30	0	0.0124479	0	2.3	504123	0.15	0.08
05-05-2021 05:11:00	11.4825	0	4.99	30	0	0.0124479	0	2.3	504123	0.15	0.08
05-05-2021 05:12:00	11.4992	0	4.99	30	0	0.0124479	0	2.3	504123	0.15	0.08
05-05-2021 05:13:00	11.5158	0	4.99	30	0	0.0124479	0	2.3	504123	0.15	0.08
05-05-2021 05:14:00	11.5325	0	4.99	30	0	0.0124479	0	2.3	504123	0.15	0.08
05-05-2021 05:15:00	11.5492	0	4.98	30	0	0.0124479	0	2.3	504123	0.15	0.08
05-05-2021 05:16:00	11.5658	0	4.98	30	0	0.0124479	0	2.3	504123	0.15	0.08
05-05-2021 05:17:00	11.5825	0	4.98	30	0	0.0124479	0	2.3	504123	0.15	0.08
05-05-2021 05:18:00	11.5992	0	4.98	30	0	0.0124479	0	2.3	504123	0.15	0.08
05-05-2021 05:19:00	11.6158	0	4.98	30	0	0.0124479	0	2.3	504123	0.15	0.08
05-05-2021 05:20:00	11.6325	0	4.98	30	0	0.0124479	0	2.3	504123	0.15	0.08
05-05-2021 05:21:00	11.6492	0	4.98	30	0	0.0124479	0	2.3	504123	0.15	0.08
05-05-2021 05:22:00	11.6658	0	4.97	30	0	0.0124479	0	2.3	504123	0.15	0.08
05-05-2021 05:23:00	11.6825	0	4.97	30	0	0.0124479	0	2.3	504123	0.15	0.08
05-05-2021 05:24:00	11.6992	0	4.97	30	0	0.0124479	0	2.3	504123	0.15	0.08
05-05-2021 05:25:00	11.7158	0	4.97	30	0	0.0124479	0	2.3	504123	0.15	0.08
05-05-2021 05:26:00	11.7325	0	4.97	30	0	0.0124479	0	2.3	504123	0.15	0.08
05-05-2021 05:27:00	11.7492	0	4.97	30	0	0.0124479	0	2.3	504123	0.16	0.09
05-05-2021 05:28:00	11.7658	0	4.97	30	0	0.0124479	0	2.3	504123	0.16	0.09
05-05-2021 05:29:00	11.7825	0	4.96	30	0	0.0124479	0	2.3	504123	0.16	0.09
05-05-2021 05:30:00	11.7992	0	4.96	30	0	0.0124479	0	2.3	504123	0.16	0.09
05-05-2021 05:31:00	11.8158	0	4.96	30	0	0.0124479	0	2.3	504123	0.16	0.09
05-05-2021 05:32:00	11.8325	0	4.96	30	0	0.0124479	0	2.3	504123	0.16	0.09
05-05-2021 05:33:00	11.8492	0	4.96	30	0	0.0124479	0	2.3	504123	0.16	0.09
05-05-2021 05:34:00	11.8658	0	4.96	30	0	0.0124479	0	2.3	504123	0.16	0.09
05-05-2021 05:35:00	11.8825	0	4.96	30	0	0.0124479	0	2.3	504123	0.16	0.09
05-05-2021 05:36:00	11.8992	0	4.95	30	0	0.0124479	0	2.3	504123	0.16	0.09
05-05-2021 05:37:00	11.9158	0	4.95	30	0	0.0124479	0	2.3	504123	0.16	0.09
05-05-2021 05:38:00	11.9325	0	4.95	30	0	0.0124479	0	2.3	504123	0.16	0.09
05-05-2021 05:39:00	11.9492	0	5	30	0	0.0124479	0	3	504123	0.16	0.09
05-05-2021 05:40:00	11.9658	0	5.02	30	0	0.0124479	0	3	504123	0.16	0.09
05-05-2021 05:41:00	11.9825	0	5.02	30	0	0.0124479	0	3	504123	0.16	0.09
05-05-2021 05:42:00	11.9992	0	5.02	30	0	0.0124479	0	3	504123	0.16	0.09
05-05-2021 05:43:00	12.0158	0	5.02	30	0	0.0124479	0	3	504123	0.16	0.09
05-05-2021 05:44:00	12.0325	0	5.02	30	0	0.0124479	0	3	504123	0.17	0.09
05-05-2021 05:45:00	12.0492	0	5.01	30	0	0.0124479	0	3	504123	0.17	0.09
05-05-2021 05:46:00	12.0658	0	5.01	30	0	0.0124479	0	3	504123	0.17	0.09
05-05-2021 05:47:00	12.0825	0	5.01	30	0	0.0124479	0	3	504123	0.17	0.09
05-05-2021 05:48:00	12.0992	0	5.01	30	0	0.0124479	0	3	504123	0.17	0.09
05-05-2021 05:49:00	12.1158	0	5.01	30	0	0.0124479	0	3	504123	0.17	0.09
05-05-2021 05:50:00	12.1325	0	5.01	30	0	0.0124479	0	3	504123	0.17	0.09
05-05-2021 05:51:00	12.1492	0	5	30	0	0.0124479	0	3	504123	0.17	0.09
05-05-2021 05:52:00	12.1658	0	5	30	0	0.0124479	0	3	504123	0.17	0.09
05-05-2021 05:53:00	12.1825	0	5	30	0	0.0124479	0	3	504123	0.17	0.09
05-05-2021 05:54:00	12.1992	0	5	30	0	0.0124479	0	3	504123	0.17	0.09
05-05-2021 05:55:00	12.2158	0	5	30	0	0.0124479	0	3	504123	0.17	0.09
05-05-2021 05:56:00	12.2325	0	5	30	0	0.0124479	0	3	504123	0.17	0.09
05-05-2021 05:57:00	12.2492	0	5	30	0	0.0124479	0	3	504123	0.17	0.09
05-05-2021 05:58:00	12.2658	0	4.99	30	0	0.0124479	0	3	504123	0.17	0.09
05-05-2021 05:59:00	12.2825	0	4.99	30	0	0.0124479	0	3	504123	0.17	0.09
05-05-2021 06:00:00	12.2992	0	4.99	30	0	0.0124479	0	3	504123	0.17	0.09
05-05-2021 06:01:00	12.3158	0	4.99	30	0	0.0124479	0	3	504123	0.17	0.09
05-05-2021 06:02:00	12.3325	0	4.99	30	0	0.0124479	0	3	504123	0.17	0.07
05-05-2021 06:03:00	12.3492	0	4.99	30	0	0.0124479	0	3	504123	0.17	0.07
05-05-2021 06:04:00	12.3658	0	4.98	30	0	0.0124479	0	3	504123	0.17	0.07
05-05-2021 06:05:00	12.3825	0	4.98	30	0	0.0124479	0	3	504123	0.17	0.07
05-05-2021 06:06:00	12.3992	0	4.98	30	0	0.0124479	0	3	504123	0.17	0.07
05-05-2021 06:07:00	12.4158	0	4.98	30	0	0.0124479	0	3	504123	0.17	0.07
05-05-2021 06:08:00	12.4325	0	4.98	30	0	0.0124479	0	3	504123	0.17	0.07
05-05-2021 06:09:00	12.4492	0	4.98	30	0	0.0124479	0	3	504123	0.17	0.07
05-05-2021 06:10:00	12.4658	0	4.97	30	0	0.0124479	0	3	504123	0.17	0.07
05-05-2021 06:11:00	12.4825	0	4.97	30	0	0.0124479	0	3	504123	0.17	0.07
05-05-2021 06:12:00	12.4992	0	4.97	30	0	0.0124479	0	3	504123	0.17	0.07
05-05-2021 06:13:00	12.5158	0	4.97	30	0	0.0124479	0	3	504123	0.17	0.07
05-05-2021 06:14:00	12.5325	0	4.97	30	0	0.0124479	0	3	504123	0.17	0.07
05-05-2021 06:15:00	12.5492	0	4.97	30	0	0.0124479	0	3	504123	0.17	0.07
05-05-2021 06:16:00	12.5658	0	4.96	30	0	0.0124479	0	3	504123	0.17	0.07
05-05-2021 06:17:00	12.5825	0	4.96	30	0	0.0124479	0	3	504123	0.17	0.07
05-05-2021 06:18:00	12.5992	0	4.96	30	0	0.0124479	0	3	504123	0.17	0.07
05-05-2021 06:19:00	12.6158	0	4.96	29.9	0	0.0124479	0	3	504123	0.18	0.09
05-05-2021 06:20:00	12.6325	0	4.96	29.9	0	0.0124479	0	3	504123	0.18	0.09
05-05-2021 06:21:00	12.6492	0	4.96	29.9	0	0.0124479	0	3	504123	0.18	0.09
05-05-2021 06:22:00	12.6658	0	4.95	29.9	0	0.0124479	0	3	504123	0.18	0.09
05-05-2021 06:23:00	12.6825	0	4.95	29.9	0	0.0124479	0	3	504123	0.18	0.09
05-05-2021 06:24:00	12.6992	0	4.95	29.9	0	0.0124479	0	3	504123	0.18	0.09
05-05-2021 06:25:00	12.7158	0	4.99	29.9	0	0.0124479	0	3.3	504123	0.18	0.09
05-05-2021 06:26:00	12.7325	0	4.98	29.9	0	0.0124479	0	3.3	504123	0.18	0.09
05-05-2021 06:27:00	12.7492	0	4.98	29.9	0	0.0124479	0	3.3	504123	0.18	0.09
05-05-2021 06:28:00	12.7658	0	4.98	30	0	0.0124479	0	3.3	504123	0.18	0.09
05-05-2021 06:29:00	12.7825	0	4.98	30	0	0.0124479	0	3.3	504123	0.18	0.09
05-05-2021 06:30:00	12.7992	0	4.98	30	0	0.0124479	0	3.3	504123	0.18	0.09
05-05-2021 06:31:00	12.8158	0	4.98	30	0	0.0124479	0	3.3	504123	0.18	0.09
05-05-2021 06:32:00	12.8325	0	4.97	30	0	0.0124479	0	3.3	504123	0.18	0.09
05-05-2021 06:33:00	12.8492	0	4.97	30	0	0.0124479	0	3.3	504123	0.18	0.09
05-05-2021 06:34:00	12.8658	0	4.97	30	0	0.0124479	0	3.3	504123	0.18	0.09
05-05-2021 06:35:00	12.8825	0	4.97	30	0	0.0124479	0	3.3	504123	0.18	0.09
05-05-2021 06:36:00	12.8992	0	4.97	30	0	0.0124479	0	3.3	504123	0.18	0.09
05-05-2021 06:37:00	12.9158	0	4.97	30	0	0.0124479	0	3.3	504123	0.19	0.09
05-05-2021 06:38:00	12.9325	0	4.96	30	0	0.0124479	0	3.3	504123	0.19	0.09
05-05-2021 06:39:00	12.9492	0	4.96	30	0	0.0124479	0	3.3	504123	0.19	0.09
05-05-2021 06:40:00	12.9658	0	4.96	30	0	0.0124479	0	3.3	504123	0.19	0.09
05-05-2021 06:41:00	12.9825	0	4.96	30	0	0.0124479	0	3.3	504123	0.19	0.09
05-05-2021 06:42:00	12.9992	0	4.96	30	0	0.0124479	0	3.3	504123	0.19	0.09
05-05-2021 06:43:00	13.0158	0	4.96	30	0	0.0124479	0	3.3	504123	0.19	0.09
05-05-2021 06:44:00	13.0325	0	4.95	30	0	0.0124479	0	3.3	504123	0.19	0.09
05-05-2021 06:45:00	13.0492	0	4.95	30	0	0.0124479	0	3.3	504123	0.19	0.09
05-05-2021 06:46:00	13.0658	0	4.95	30	0	0.0124479	0	3.8	504123	0.19	0.09
05-05-2021 06:47:00	13.0825	0	5	30	0	0.0124479	0	4.3	504123	0.19	0.09
05-05-2021 06:48:00	13.0992	0	5	30	0	0.0124479	0	4.3	504123	0.19	0.09
05-05-2021 06:49:00	13.1158	0	5	30	0	0.0124479	0	4.3	504123	0.19	0.09
05-05-2021 06:50:00	13.1325	0	4.99	30	0	0.0124479	0	4.3	504123	0.19	0.09
05-05-2021 06:51:00	13.1492	0	4.99	30	0	0.0124479	0	4.3	504123	0.19	0.09
05-05-2021 06:52:00	13.1658	0	4.99	30	0	0.0124479	0	4.3	504123	0.19	0.09
05-05-2021 06:53:00	13.1825	0	4.99	30	0	0.0124479	0	4.3	504123	0.19	0.09
05-05-2021 06:54:00	13.1992	0	4.99	30	0	0.0124479	0	4.3	504123	0.2	0.08
05-05-2021 06:55:00	13.2158	0	4.98	30	0	0.0124479	0	4.3	504123	0.2	0.09
05-05-2021 06:56:00	13.2325	0	4.98	30	0	0.0124479	0	4.3	504123	0.2	0.09
05-05-2021 06:57:00	13.2492	0	4.98	30	0	0.0124479	0	4.3	504123	0.2	0.09
05-05-2021 06:58:00	13.2658	0	4.98	30	0	0.0124479	0	4.3	504123	0.2	0.09
05-05-2021 06:59:00	13.2825	0	4.98	30	0	0.0124479	0	4.3	504123	0.2	0.09
05-05-2021 07:00:00	13.2992	0	4.98	30	0	0.0124479	0	4.3	504123	0.2	0.09
05-05-2021 07:01:00	13.3158	0	4.97	30	0	0.0124479	0	4.3	504123	0.2	0.09
05-05-2021 07:02:00	13.3325	0	4.97	30	0	0.0124479	0	4.3	504123	0.2	0.09
05-05-2021 07:03:00	13.3492	0	4.97	30	0	0.0124479	0	4.3	504123	0.2	0.09
05-05-2021 07:04:00	13.3658	0	4.97	30	0	0.0124479	0	4.3	504123	0.2	0.09
05-05-2021 07:05:00	13.3825	0	4.97	30	0	0.0124479	0	4.3	504123	0.2	0.09
05-05-2021 07:06:00	13.3992	0	4.96	30	0	0.0124479	0	4.3	504123	0.2	0.09
05-05-2021 07:07:00	13.4158	0	4.96	30	0	0.0124479	0	4.3	504123	0.2	0.09
05-05-2021 07:08:00	13.4325	0	4.96	30	0	0.0124479	0	4.3	504123	0.2	0.09
05-05-2021 07:09:00	13.4492	0	4.96	30	0	0.0124479	0	4.3	504123	0.2	0.09
05-05-2021 07:10:00	13.4658	0	4.96	30	0	0.0124479	0	4.3	504123	0.2	0.09
05-05-2021 07:11:00	13.4825	0	4.95	30	0	0.0124479	0	4.3	504123	0.2	0.09
05-05-2021 07:12:00	13.4992	0	4.95	30	0	0.0124479	0	4.3	504123	0.21	0.08
05-05-2021 07:13:00	13.5158	0	4.95	30	0	0.0124479	0	4.3	504123	0.21	0.08
05-05-2021 07:14:00	13.5325	0	4.99	30	0	0.0124479	0	4.6	504123	0.21	0.08
05-05-2021 07:15:00	13.5492	0	4.98	30	0	0.0124479	0	4.6	504123	0.21	0.08
05-05-2021 07:16:00	13.5658	0	4.98	30	0	0.0124479	0	4.6	504123	0.21	0.08
05-05-2021 07:17:00	13.5825	0	4.98	30	0	0.0124479	0	4.6	504123	0.21	0.08
05-05-2021 07:18:00	13.5992	0	4.98	30	0	0.0124479	0	4.6	504123	0.21	0.08
05-05-2021 07:19:00	13.6158	0	4.98	30	0	0.0124479	0	4.6	504123	0.21	0.08
05-05-2021 07:20:00	13.6325	0	4.97	30	0	0.0124479	0	4.6	504123	0.21	0.08
05-05-2021 07:21:00	13.6492	0	4.97	30	0	0.0124479	0	4.6	504123	0.21	0.08
05-05-2021 07:22:00	13.6658	0	4.97	30	0	0.0124479	0	4.6	504123	0.21	0.08
05-05-2021 07:23:00	13.6825	0	4.97	30	0	0.0124479	0	4.6	504123	0.21	0.08
05-05-2021 07:24:00	13.6992	0	4.97	30	0	0.0124479	0	4.6	504123	0.21	0.08
05-05-2021 07:25:00	13.7158	0	4.96	30	0	0.0124479	0	4.6	504123	0.21	0.08
05-05-2021 07:26:00	13.7325	0	4.96	30	0	0.0124479	0	4.6	504123	0.21	0.08
05-05-2021 07:27:00	13.7492	0	4.96	30	0	0.0124479	0	4.6	504123	0.21	0.08
05-05-2021 07:28:00	13.7658	0	4.96	30	0	0.0124479	0	4.6	504123	0.21	0.08
05-05-2021 07:29:00	13.7825	0	4.96	30	0	0.0124479	0	4.6	504123	0.22	0.09
05-05-2021 07:30:00	13.7992	0	4.96	30	0	0.0124479	0	4.6	504123	0.22	0.09
05-05-2021 07:31:00	13.8158	0	4.95	30	0	0.0124479	0	4.6	504123	0.22	0.09
05-05-2021 07:32:00	13.8325	0	4.95	30	0	0.0124479	0	4.6	504123	0.22	0.09
05-05-2021 07:33:00	13.8492	0	5	30	0	0.0124479	0	5.3	504123	0.22	0.09
05-05-2021 07:34:00	13.8658	0	5	30	0	0.0124479	0	5.3	504123	0.22	0.09
05-05-2021 07:35:00	13.8825	0	5	30	0	0.0124479	0	5.3	504123	0.22	0.09
05-05-2021 07:36:00	13.8992	0	4.99	30	0	0.0124479	0	5.3	504123	0.22	0.09
05-05-2021 07:37:00	13.9158	0	4.99	30	0	0.0124479	0	5.3	504123	0.22	0.09
05-05-2021 07:38:00	13.9325	0	4.99	30	0	0.0124479	0	5.3	504123	0.22	0.09
05-05-2021 07:39:00	13.9492	0	4.99	30	0	0.0124479	0	5.3	504123	0.22	0.09
05-05-2021 07:40:00	13.9658	0	4.99	30	0	0.0124479	0	5.3	504123	0.22	0.09
05-05-2021 07:41:00	13.9825	0	4.98	30	0	0.0124479	0	5.3	504123	0.22	0.09
05-05-2021 07:42:00	13.9992	0	4.98	30	0	0.0124479	0	5.3	504123	0.22	0.09
05-05-2021 07:43:00	14.0158	0	4.98	30	0	0.0124479	0	5.3	504123	0.22	0.09
05-05-2021 07:44:00	14.0325	0	4.98	30	0	0.0124479	0	5.3	504123	0.22	0.09
05-05-2021 07:45:00	14.0492	0	4.98	30	0	0.0124479	0	5.3	504123	0.22	0.09
05-05-2021 07:46:00	14.0658	0	4.97	30	0	0.0124479	0	5.3	504123	0.22	0.09
05-05-2021 07:47:00	14.0825	0	4.97	30	0	0.0124479	0	5.3	504123	0.23	0.09
05-05-2021 07:48:00	14.0992	0	4.97	30	0	0.0124479	0	5.3	504123	0.23	0.09
05-05-2021 07:49:00	14.1158	0	4.97	30	0	0.0124479	0	5.3	504123	0.23	0.09
05-05-2021 07:50:00	14.1325	0	4.97	30	0	0.0124479	0	5.3	504123	0.23	0.09
05-05-2021 07:51:00	14.1492	0	4.96	30	0	0.0124479	0	5.3	504123	0.23	0.09
05-05-2021 07:52:00	14.1658	0	4.96	30	0	0.0124479	0	5.3	504123	0.23	0.09
05-05-2021 07:53:00	14.1825	0	4.96	30	0	0.0124479	0	5.3	504123	0.23	0.09
05-05-2021 07:54:00	14.1992	0	4.96	30	0	0.0124479	0	5.3	504123	0.23	0.09
05-05-2021 07:55:00	14.2158	0	4.95	30	0	0.0124479	0	5.3	504123	0.23	0.09
05-05-2021 07:56:00	14.2325	0	4.95	30	0	0.0124479	0	5.3	504123	0.23	0.09
05-05-2021 07:57:00	14.2492	0	4.95	30	0	0.0124479	0	5.3	504123	0.23	0.09
05-05-2021 07:58:00	14.2658	0	4.98	30	0	0.0124479	0	5.6	504123	0.23	0.09
05-05-2021 07:59:00	14.2825	0	4.98	30	0	0.0124479	0	5.6	504123	0.23	0.09
05-05-2021 08:00:00	14.2992	0	4.98	30	0	0.0124479	0	5.6	504123	0.23	0.09
05-05-2021 08:01:00	14.3158	0	4.98	30	0	0.0124479	0	5.6	504123	0.23	0.09
05-05-2021 08:02:00	14.3325	0	4.98	30	0	0.0124479	0	5.6	504123	0.23	0.09
05-05-2021 08:03:00	14.3492	0	4.98	30	0	0.0124479	0	5.6	504123	0.23	0.09
05-05-2021 08:04:00	14.3658	0	4.97	30	0	0.0124479	0	5.6	504123	0.24	0.09
05-05-2021 08:05:00	14.3825	0	4.97	30	0	0.0124479	0	5.6	504123	0.24	0.09
05-05-2021 08:06:00	14.3992	0	4.97	30	0	0.0124479	0	5.6	504123	0.24	0.09
05-05-2021 08:07:00	14.4158	0	4.97	30	0	0.0124479	0	5.6	504123	0.24	0.09
05-05-2021 08:08:00	14.4325	0	4.96	30	0	0.0124479	0	5.6	504123	0.24	0.09
05-05-2021 08:09:00	14.4492	0	4.96	30	0	0.0124479	0	5.6	504123	0.24	0.09
05-05-2021 08:10:00	14.4658	0	4.96	30	0	0.0124479	0	5.6	504123	0.24	0.09
05-05-2021 08:11:00	14.4825	0	4.96	30	0	0.0124479	0	5.6	504123	0.24	0.09
05-05-2021 08:12:00	14.4992	0	4.96	30	0	0.0124479	0	5.6	504123	0.24	0.09
05-05-2021 08:13:00	14.5158	0	4.95	30	0	0.0124479	0	5.6	504123	0.24	0.09
05-05-2021 08:14:00	14.5325	0	4.95	30	0	0.0124479	0	5.6	504123	0.24	0.09
05-05-2021 08:15:00	14.5492	0	5	30	0	0.0124479	0	6.6	504123	0.24	0.09
05-05-2021 08:16:00	14.5658	0	5	30	0	0.0124479	0	6.6	504123	0.24	0.09
05-05-2021 08:17:00	14.5825	0	4.99	30	0	0.0124479	0	6.6	504123	0.24	0.09
05-05-2021 08:18:00	14.5992	0	4.99	30	0	0.0124479	0	6.6	504123	0.24	0.09
05-05-2021 08:19:00	14.6158	0	4.99	30	0	0.0124479	0	6.6	504123	0.24	0.09
05-05-2021 08:20:00	14.6325	0	4.99	30	0	0.0124479	0	6.6	504123	0.24	0.09
05-05-2021 08:21:00	14.6492	0	4.99	30	0	0.0124479	0	6.6	504123	0.24	0.09
05-05-2021 08:22:00	14.6658	0	4.98	30	0	0.0124479	0	6.6	504123	0.25	0.09
05-05-2021 08:23:00	14.6825	0	4.98	30	0	0.0124479	0	6.6	504123	0.25	0.09
05-05-2021 08:24:00	14.6992	0	4.98	30	0	0.0124479	0	6.6	504123	0.25	0.09
05-05-2021 08:25:00	14.7158	0	4.98	30	0	0.0124479	0	6.6	504123	0.25	0.09
05-05-2021 08:26:00	14.7325	0	4.98	30	0	0.0124479	0	6.6	504123	0.25	0.09
05-05-2021 08:27:00	14.7492	0	4.97	30	0	0.0124479	0	6.6	504123	0.25	0.09
05-05-2021 08:28:00	14.7658	0	5	30	0	0.0124479	0	6.6	504123	0.25	0.09
05-05-2021 08:29:00	14.7825	0	5	30	0	0.0124479	0	6.6	504123	0.25	0.09
05-05-2021 08:30:00	14.7992	0	4.99	30	0	0.0124479	0	6.6	504123	0.25	0.09
05-05-2021 08:31:00	14.8158	0	4.99	30	0	0.0124479	0	6.6	504123	0.25	0.09
05-05-2021 08:32:00	14.8325	0	4.99	30	0	0.0124479	0	6.6	504123	0.25	0.09
05-05-2021 08:33:00	14.8492	0	4.99	30	0	0.0124479	0	6.6	504123	0.25	0.09
05-05-2021 08:34:00	14.8658	0	4.98	30	0	0.0124479	0	6.6	504123	0.25	0.09
05-05-2021 08:35:00	14.8825	0	4.98	30	0	0.0124479	0	6.6	504123	0.25	0.09
05-05-2021 08:36:00	14.8992	0	4.98	30	0	0.0124479	0	6.6	504123	0.25	0.09
05-05-2021 08:37:00	14.9158	0	4.98	30	0	0.0124479	0	6.6	504123	0.25	0.09
05-05-2021 08:38:00	14.9325	0	4.98	30	0	0.0124479	0	6.6	504123	0.25	0.09
05-05-2021 08:39:00	14.9492	0	4.97	30	0	0.0124479	0	6.6	504123	0.26	0.08
05-05-2021 08:40:00	14.9658	0	4.97	30	0	0.0124479	0	6.6	504123	0.26	0.08
05-05-2021 08:41:00	14.9825	0	4.97	30	0	0.0124479	0	6.6	504123	0.26	0.08
05-05-2021 08:42:00	14.9992	0	4.97	30	0	0.0124479	0	6.6	504123	0.26	0.08
05-05-2021 08:43:00	15.0158	0	4.96	30	0	0.0124479	0	6.6	504123	0.26	0.08
05-05-2021 08:44:00	15.0325	0	4.96	30	0	0.0124479	0	6.6	504123	0.26	0.08
05-05-2021 08:45:00	15.0492	0	4.96	30	0	0.0124479	0	6.6	504123	0.26	0.08
05-05-2021 08:46:00	15.0658	0	4.96	30	0	0.0124479	0	6.6	504123	0.26	0.08
05-05-2021 08:47:00	15.0825	0	4.95	30	0	0.0124479	0	6.6	504123	0.26	0.08
05-05-2021 08:48:00	15.0992	0	4.95	30	0	0.0124479	0	6.6	504123	0.26	0.08
05-05-2021 08:49:00	15.1158	0	4.95	30	0	0.0124479	0	7.1	504123	0.26	0.08
05-05-2021 08:50:00	15.1325	0	5	30	0	0.0124479	0	7.3	504123	0.26	0.08
05-05-2021 08:51:00	15.1492	0	4.99	30	0	0.0124479	0	7.3	504123	0.26	0.08
05-05-2021 08:52:00	15.1658	0	4.99	30	0	0.0124479	0	7.3	504123	0.26	0.08
05-05-2021 08:53:00	15.1825	0	4.99	30	0	0.0124479	0	7.3	504123	0.26	0.08
05-05-2021 08:54:00	15.1992	0	4.99	30	0	0.0124479	0	7.3	504123	0.26	0.08
05-05-2021 08:55:00	15.2158	0	4.99	30	0	0.0124479	0	7.3	504123	0.26	0.08
05-05-2021 08:56:00	15.2325	0	4.98	30	0	0.0124479	0	7.3	504123	0.26	0.08
05-05-2021 08:57:00	15.2492	0	4.98	30	0	0.0124479	0	7.3	504123	0.28	0.08
05-05-2021 08:58:00	15.2658	0	4.98	30	0	0.0124479	0	7.3	504123	0.28	0.08
05-05-2021 08:59:00	15.2825	0	4.98	30	0	0.0124479	0	7.3	504123	0.28	0.08
05-05-2021 09:00:00	15.2992	0	4.97	30	0	0.0124479	0	7.3	504123	0.28	0.08
05-05-2021 09:01:00	15.3158	0	4.97	30	0	0.0124479	0	7.3	504123	0.28	0.08
05-05-2021 09:02:00	15.3325	0	4.97	30	0	0.0124479	0	7.3	504123	0.28	0.08
05-05-2021 09:03:00	15.3492	0	4.97	30	0	0.0124479	0	7.3	504123	0.28	0.08
05-05-2021 09:04:00	15.3658	0	4.96	30	0	0.0124479	0	7.3	504123	0.28	0.08
05-05-2021 09:05:00	15.3825	0	4.96	30	0	0.0124479	0	7.3	504123	0.28	0.08
05-05-2021 09:06:00	15.3992	0	4.96	30	0	0.0124479	0	7.3	504123	0.28	0.08
05-05-2021 09:07:00	15.4158	0	4.96	30	0	0.0124479	0	7.3	504123	0.28	0.08
05-05-2021 09:08:00	15.4325	0	4.95	30	0	0.0124479	0	7.3	504123	0.28	0.08
05-05-2021 09:09:00	15.4492	0	4.95	30	0	0.0124479	0	7.3	504123	0.28	0.08
05-05-2021 09:10:00	15.4658	0	4.98	30	0	0.0124479	0	7.6	504123	0.28	0.08
05-05-2021 09:11:00	15.4825	0	4.98	30	0	0.0124479	0	7.6	504123	0.28	0.08
05-05-2021 09:12:00	15.4992	0	4.98	30	0	0.0124479	0	7.6	504123	0.28	0.08
05-05-2021 09:13:00	15.5158	0	4.97	30	0	0.0124479	0	7.6	504123	0.28	0.08
05-05-2021 09:14:00	15.5325	0	4.97	30	0	0.0124479	0	7.6	504123	0.3	0.08
05-05-2021 09:15:00	15.5492	0	4.97	30	0	0.0124479	0	7.6	504123	0.3	0.08
05-05-2021 09:16:00	15.5658	0	4.97	30	0	0.0124479	0	7.6	504123	0.3	0.08
05-05-2021 09:17:00	15.5825	0	4.96	30	0	0.0124479	0	7.6	504123	0.3	0.08
05-05-2021 09:18:00	15.5992	0	4.96	30	0	0.0124479	0	7.6	504123	0.3	0.08
05-05-2021 09:19:00	15.6158	0	4.96	30	0	0.0124479	0	7.6	504123	0.3	0.08
05-05-2021 09:20:00	15.6325	0	4.96	30	0	0.0124479	0	7.6	504123	0.3	0.08
05-05-2021 09:21:00	15.6492	0	4.95	30	0	0.0124479	0	7.6	504123	0.3	0.08
05-05-2021 09:22:00	15.6658	0	4.95	30	0	0.0124479	0	7.6	504123	0.3	0.08
05-05-2021 09:23:00	15.6825	0	5	30	0	0.0124479	0	8.6	504123	0.3	0.08
05-05-2021 09:24:00	15.6992	0	5	30	0	0.0124479	0	8.6	504123	0.3	0.08
05-05-2021 09:25:00	15.7158	0	4.99	30	0	0.0124479	0	8.6	504123	0.3	0.08
05-05-2021 09:26:00	15.7325	0	4.99	30	0	0.0124479	0	8.6	504123	0.3	0.08
05-05-2021 09:27:00	15.7492	0	4.99	30	0	0.0124479	0	8.6	504123	0.3	0.08
05-05-2021 09:28:00	15.7658	0	4.98	30	0	0.0124479	0	8.6	504123	0.3	0.08
05-05-2021 09:29:00	15.7825	0	4.98	30	0	0.0124479	0	8.6	504123	0.3	0.08
05-05-2021 09:30:00	15.7992	0	4.98	30	0	0.0124479	0	8.6	504123	0.3	0.08
05-05-2021 09:31:00	15.8158	0	4.98	30	0	0.0124479	0	8.6	504123	0.3	0.08
05-05-2021 09:32:00	15.8325	0	4.97	30	0	0.0124479	0	8.6	504123	0.3	0.08
05-05-2021 09:33:00	15.8492	0	4.97	30	0	0.0124479	0	8.6	504123	0.3	0.08
05-05-2021 09:34:00	15.8658	0	5	30	0	0.0124479	0	8.6	504123	0.3	0.08
05-05-2021 09:35:00	15.8825	0	4.99	30	0	0.0124479	0	8.6	504123	0.3	0.08
05-05-2021 09:36:00	15.8992	0	4.99	30	0	0.0124479	0	8.6	504123	0.3	0.08
05-05-2021 09:37:00	15.9158	0	4.99	30	0	0.0124479	0	8.6	504123	0.3	0.08
05-05-2021 09:38:00	15.9325	0	4.99	30	0	0.0124479	0	8.6	504123	0.3	0.08
05-05-2021 09:39:00	15.9492	0	4.98	30	0	0.0124479	0	8.6	504123	0.3	0.08
05-05-2021 09:40:00	15.9658	0	4.98	30	0	0.0124479	0	8.6	504123	0.3	0.08
05-05-2021 09:41:00	15.9825	0	4.98	30	0	0.0124479	0	8.6	504123	0.3	0.08
05-05-2021 09:42:00	15.9992	0	4.98	30	0	0.0124479	0	8.6	504123	0.3	0.08
05-05-2021 09:43:00	16.0158	0	4.97	30	0	0.0124479	0	8.6	504123	0.3	0.08
05-05-2021 09:44:00	16.0325	0	4.97	30	0	0.0124479	0	8.6	504123	0.3	0.08
05-05-2021 09:45:00	16.0492	0	4.97	30	0	0.0124479	0	8.6	504123	0.3	0.08
05-05-2021 09:46:00	16.0658	0	4.96	30	0	0.0124479	0	8.6	504123	0.3	0.08
05-05-2021 09:47:00	16.0825	0	4.96	30	0	0.0124479	0	8.6	504123	0.3	0.08
05-05-2021 09:48:00	16.0992	0	4.96	30	0	0.0124479	0	8.6	504123	0.3	0.08
05-05-2021 09:49:00	16.1158	0	4.96	30	0	0.0124479	0	8.6	504123	0.32	0.08
05-05-2021 09:50:00	16.1325	0	4.95	30	0	0.0124479	0	8.6	504123	0.32	0.08
05-05-2021 09:51:00	16.1492	0	4.95	30	0	0.0124479	0	8.6	504123	0.32	0.08
05-05-2021 09:52:00	16.1658	0	5	30	0	0.0124479	0	9.3	504123	0.32	0.08
05-05-2021 09:53:00	16.1825	0	5	30	0	0.0124479	0	9.3	504123	0.32	0.08
05-05-2021 09:54:00	16.1992	0	4.99	30	0	0.0124479	0	9.3	504123	0.32	0.08
05-05-2021 09:55:00	16.2158	0	4.99	30	0	0.0124479	0	9.3	504123	0.32	0.08
05-05-2021 09:56:00	16.2325	0	4.99	30	0	0.0124479	0	9.3	504123	0.32	0.08
05-05-2021 09:57:00	16.2492	0	4.98	30	0	0.0124479	0	9.3	504123	0.32	0.08
05-05-2021 09:58:00	16.2658	0	4.98	30	0	0.0124479	0	9.3	504123	0.32	0.08
05-05-2021 09:59:00	16.2825	0	4.98	30	0	0.0124479	0	9.3	504123	0.32	0.08
05-05-2021 10:00:00	16.2992	0	4.98	30	0	0.0124479	0	9.3	504123	0.32	0.08
05-05-2021 10:01:00	16.3158	0	4.97	30	0	0.0124479	0	9.3	504123	0.32	0.08
05-05-2021 10:02:00	16.3325	0	4.97	30	0	0.0124479	0	9.3	504123	0.32	0.08
05-05-2021 10:03:00	16.3492	0	4.97	30	0	0.0124479	0	9.3	504123	0.32	0.08
05-05-2021 10:04:00	16.3658	0	4.96	30	0	0.0124479	0	9.3	504123	0.32	0.08
05-05-2021 10:05:00	16.3825	0	4.96	30	0	0.0124479	0	9.3	504123	0.32	0.08
05-05-2021 10:06:00	16.3992	0	4.96	30	0	0.0124479	0	9.3	504123	0.32	0.08
05-05-2021 10:07:00	16.4158	0	4.96	30	0	0.0124479	0	9.3	504123	0.34	0.08
05-05-2021 10:08:00	16.4325	0	4.95	30	0	0.0124479	0	9.3	504123	0.34	0.08
05-05-2021 10:09:00	16.4492	0	4.95	30	0	0.0124479	0	9.3	504123	0.34	0.08
05-05-2021 10:10:00	16.4658	0	4.98	30	0	0.0124479	0	9.6	504123	0.34	0.08
05-05-2021 10:11:00	16.4825	0	4.98	30	0	0.0124479	0	9.6	504123	0.34	0.08
05-05-2021 10:12:00	16.4992	0	4.97	30	0	0.0124479	0	9.6	504123	0.34	0.08
05-05-2021 10:13:00	16.5158	0	4.97	30	0	0.0124479	0	9.6	504123	0.34	0.08
05-05-2021 10:14:00	16.5325	0	4.97	30	0	0.0124479	0	9.6	504123	0.34	0.08
05-05-2021 10:15:00	16.5492	0	4.96	30	0	0.0124479	0	9.6	504123	0.34	0.08
05-05-2021 10:16:00	16.5658	0	4.96	30	0	0.0124479	0	9.6	504123	0.34	0.08
05-05-2021 10:17:00	16.5825	0	4.96	30	0	0.0124479	0	9.6	504123	0.34	0.08
05-05-2021 10:18:00	16.5992	0	4.96	30	0	0.0124479	0	9.6	504123	0.34	0.08
05-05-2021 10:19:00	16.6158	0	4.95	30	0	0.0124479	0	9.6	504123	0.34	0.08
05-05-2021 10:20:00	16.6325	0	4.95	30	0	0.0124479	0	9.7	504123	0.34	0.08
05-05-2021 10:21:00	16.6492	0	4.99	30	0	0.0124479	0	10.6	504123	0.34	0.08
05-05-2021 10:22:00	16.6658	0	4.99	30	0	0.0124479	0	10.6	504123	0.34	0.08
05-05-2021 10:23:00	16.6825	0	4.99	30	0	0.0124479	0	10.6	504123	0.34	0.08
05-05-2021 10:24:00	16.6992	0	4.99	30	0	0.0124479	0	10.6	504123	0.35	0.09
05-05-2021 10:25:00	16.7158	0	4.98	30	0	0.0124479	0	10.6	504123	0.36	0.08
05-05-2021 10:26:00	16.7325	0	4.98	30	0	0.0124479	0	10.6	504123	0.36	0.08
05-05-2021 10:27:00	16.7492	0	4.98	30	0	0.0124479	0	10.6	504123	0.36	0.08
05-05-2021 10:28:00	16.7658	0	4.97	30	0	0.0124479	0	10.6	504123	0.36	0.08
05-05-2021 10:29:00	16.7825	0	4.97	30	0	0.0124479	0	10.6	504123	0.36	0.08
05-05-2021 10:30:00	16.7992	0	4.97	30	0	0.0124479	0	10.6	504123	0.36	0.08
05-05-2021 10:31:00	16.8158	0	4.96	30	0	0.0124479	0	10.6	504123	0.36	0.08
05-05-2021 10:32:00	16.8325	0	4.96	30	0	0.0124479	0	10.6	504123	0.36	0.08
05-05-2021 10:33:00	16.8492	0	4.96	30	0	0.0124479	0	10.6	504123	0.36	0.08
05-05-2021 10:34:00	16.8658	0	4.96	30	0	0.0124479	0	10.6	504123	0.36	0.08
05-05-2021 10:35:00	16.8825	0	4.95	30	0	0.0124479	0	10.6	504123	0.36	0.08
05-05-2021 10:36:00	16.8992	0	4.98	30	0	0.0124479	0	10.6	504123	0.36	0.08
05-05-2021 10:37:00	16.9158	0	4.97	30	0	0.0124479	0	10.6	504123	0.36	0.08
05-05-2021 10:38:00	16.9325	0	4.97	30	0	0.0124479	0	10.6	504123	0.36	0.08
05-05-2021 10:39:00	16.9492	0	4.97	30	0	0.0124479	0	10.6	504123	0.36	0.08
05-05-2021 10:40:00	16.9658	0	4.96	30	0	0.0124479	0	10.6	504123	0.36	0.08
05-05-2021 10:41:00	16.9825	0	4.96	30	0	0.0124479	0	10.6	504123	0.36	0.08
05-05-2021 10:42:00	16.9992	0	4.96	30	0	0.0124479	0	10.6	504123	0.38	0.09
05-05-2021 10:43:00	17.0158	0	4.96	30	0	0.0124479	0	10.6	504123	0.38	0.09
05-05-2021 10:44:00	17.0325	0	4.95	30	0	0.0124479	0	10.6	504123	0.38	0.09
05-05-2021 10:45:00	17.0492	0	4.98	30	0	0.0124479	0	11.1	504123	0.38	0.09
05-05-2021 10:46:00	17.0658	0	4.99	30	0	0.0124479	0	11.3	504123	0.38	0.09
05-05-2021 10:47:00	17.0825	0	4.99	30	0	0.0124479	0	11.3	504123	0.38	0.09
05-05-2021 10:48:00	17.0992	0	4.99	30	0	0.0124479	0	11.3	504123	0.38	0.09
05-05-2021 10:49:00	17.1158	0	4.99	30	0	0.0124479	0	11.3	504123	0.38	0.09
05-05-2021 10:50:00	17.1325	0	4.98	30	0	0.0124479	0	11.3	504123	0.38	0.09
05-05-2021 10:51:00	17.1492	0	4.98	30	0	0.0124479	0	11.3	504123	0.38	0.09
05-05-2021 10:52:00	17.1658	0	4.98	30	0	0.0124479	0	11.3	504123	0.38	0.09
05-05-2021 10:53:00	17.1825	0	4.97	30	0	0.0124479	0	11.3	504123	0.38	0.09
05-05-2021 10:54:00	17.1992	0	4.97	30	0	0.0124479	0	11.3	504123	0.38	0.09
05-05-2021 10:55:00	17.2158	0	4.97	30	0	0.0124479	0	11.3	504123	0.38	0.09
05-05-2021 10:56:00	17.2325	0	4.96	30	0	0.0124479	0	11.3	504123	0.38	0.09
05-05-2021 10:57:00	17.2492	0	4.96	30	0	0.0124479	0	11.3	504123	0.38	0.09
05-05-2021 10:58:00	17.2658	0	4.96	30	0	0.0124479	0	11.3	504123	0.38	0.09
05-05-2021 10:59:00	17.2825	0	4.95	30	0	0.0124479	0	11.3	504123	0.39	0.08
05-05-2021 11:00:00	17.2992	0	4.95	30	0	0.0124479	0	11.4	504123	0.39	0.09
05-05-2021 11:01:00	17.3158	0	4.98	30	0	0.0124479	0	11.6	504123	0.39	0.09
05-05-2021 11:02:00	17.3325	0	4.97	30	0	0.0124479	0	11.6	504123	0.39	0.09
05-05-2021 11:03:00	17.3492	0	4.97	30	0	0.0124479	0	11.6	504123	0.39	0.09
05-05-2021 11:04:00	17.3658	0	4.97	30	0	0.0124479	0	11.6	504123	0.39	0.09
05-05-2021 11:05:00	17.3825	0	4.96	30	0	0.0124479	0	11.6	504123	0.39	0.09
05-05-2021 11:06:00	17.3992	0	4.96	30	0	0.0124479	0	11.6	504123	0.39	0.09
05-05-2021 11:07:00	17.4158	0	4.96	30	0	0.0124479	0	11.6	504123	0.39	0.09
05-05-2021 11:08:00	17.4325	0	4.95	30	0	0.0124479	0	11.6	504123	0.39	0.09
05-05-2021 11:09:00	17.4492	0	4.95	30	0	0.0124479	0	11.6	504123	0.39	0.09
05-05-2021 11:10:00	17.4658	0	4.99	30	0	0.0124479	0	12.6	504123	0.39	0.09
05-05-2021 11:11:00	17.4825	0	4.99	30	0	0.0124479	0	12.6	504123	0.39	0.09
05-05-2021 11:12:00	17.4992	0	4.99	30	0	0.0124479	0	12.6	504123	0.39	0.09
05-05-2021 11:13:00	17.5158	0	4.98	30	0	0.0124479	0	12.6	504123	0.39	0.09
05-05-2021 11:14:00	17.5325	0	4.98	30	0	0.0124479	0	12.6	504123	0.39	0.09
05-05-2021 11:15:00	17.5492	0	4.98	30	0	0.0124479	0	12.6	504123	0.39	0.09
05-05-2021 11:16:00	17.5658	0	4.97	30	0	0.0124479	0	12.6	504123	0.39	0.09
05-05-2021 11:17:00	17.5825	0	4.97	30	0	0.0124479	0	12.6	504123	0.41	0.08
05-05-2021 11:18:00	17.5992	0	4.97	30	0	0.0124479	0	12.6	504123	0.41	0.08
05-05-2021 11:19:00	17.6158	0	4.96	30	0	0.0124479	0	12.6	504123	0.41	0.08
05-05-2021 11:20:00	17.6325	0	4.96	30	0	0.0124479	0	12.6	504123	0.41	0.08
05-05-2021 11:21:00	17.6492	0	4.98	30	0	0.0124479	0	12.6	504123	0.41	0.08
05-05-2021 11:22:00	17.6658	0	4.98	30	0	0.0124479	0	12.6	504123	0.41	0.08
05-05-2021 11:23:00	17.6825	0	4.98	30	0	0.0124479	0	12.6	504123	0.41	0.08
05-05-2021 11:24:00	17.6992	0	4.97	30	0	0.0124479	0	12.6	504123	0.41	0.08
05-05-2021 11:25:00	17.7158	0	4.97	30	0	0.0124479	0	12.6	504123	0.41	0.08
05-05-2021 11:26:00	17.7325	0	4.97	30	0	0.0124479	0	12.6	504123	0.41	0.08
05-05-2021 11:27:00	17.7492	0	4.96	30	0	0.0124479	0	12.6	504123	0.41	0.08
05-05-2021 11:28:00	17.7658	0	4.96	30	0	0.0124479	0	12.6	504123	0.41	0.08
05-05-2021 11:29:00	17.7825	0	4.96	30	0	0.0124479	0	12.6	504123	0.41	0.08
05-05-2021 11:30:00	17.7992	0	4.95	30	0	0.0124479	0	12.6	504123	0.41	0.08
05-05-2021 11:31:00	17.8158	0	4.95	30	0	0.0124479	0	12.7	504123	0.41	0.08
05-05-2021 11:32:00	17.8325	0	4.99	30	0	0.0124479	0	13.3	504123	0.41	0.08
05-05-2021 11:33:00	17.8492	0	4.99	30	0	0.0124479	0	13.3	504123	0.41	0.08
05-05-2021 11:34:00	17.8658	0	4.99	30	0	0.0124479	0	13.3	504123	0.43	0.09
05-05-2021 11:35:00	17.8825	0	4.98	30	0	0.0124479	0	13.3	504123	0.43	0.09
05-05-2021 11:36:00	17.8992	0	4.98	30	0	0.0124479	0	13.3	504123	0.43	0.09
05-05-2021 11:37:00	17.9158	0	4.98	30	0	0.0124479	0	13.3	504123	0.43	0.09
05-05-2021 11:38:00	17.9325	0	4.97	30	0	0.0124479	0	13.3	504123	0.43	0.09
05-05-2021 11:39:00	17.9492	0	4.97	30	0	0.0124479	0	13.3	504123	0.43	0.09
05-05-2021 11:40:00	17.9658	0	4.97	30	0	0.0124479	0	13.3	504123	0.43	0.09
05-05-2021 11:41:00	17.9825	0	4.96	30	0	0.0124479	0	13.3	504123	0.43	0.09
05-05-2021 11:42:00	17.9992	0	4.96	30	0	0.0124479	0	13.3	504123	0.43	0.09
05-05-2021 11:43:00	18.0158	0	4.95	30	0	0.0124479	0	13.3	504123	0.43	0.09
05-05-2021 11:44:00	18.0325	0	4.95	30	0	0.0124479	0	13.3	504123	0.43	0.09
05-05-2021 11:45:00	18.0492	0	4.98	30	0	0.0124479	0	13.6	504123	0.43	0.09
05-05-2021 11:46:00	18.0658	0	4.97	30	0	0.0124479	0	13.6	504123	0.43	0.09
05-05-2021 11:47:00	18.0825	0	4.97	30	0	0.0124479	0	13.6	504123	0.43	0.09
05-05-2021 11:48:00	18.0992	0	4.97	30	0	0.0124479	0	13.6	504123	0.43	0.09
05-05-2021 11:49:00	18.1158	0	4.96	30	0	0.0124479	0	13.6	504123	0.43	0.09
05-05-2021 11:50:00	18.1325	0	4.96	30	0	0.0124479	0	13.6	504123	0.43	0.09
05-05-2021 11:51:00	18.1492	0	4.96	30	0	0.0124479	0	13.6	504123	0.43	0.09
05-05-2021 11:52:00	18.1658	0	4.95	30	0	0.0124479	0	13.6	504123	0.46	0.09
05-05-2021 11:53:00	18.1825	0	4.99	30	0	0.0124479	0	14.5	504123	0.46	0.09
05-05-2021 11:54:00	18.1992	0	4.99	30	0	0.0124479	0	14.6	504123	0.46	0.09
05-05-2021 11:55:00	18.2158	0	4.99	30	0	0.0124479	0	14.6	504123	0.46	0.09
05-05-2021 11:56:00	18.2325	0	4.98	30	0	0.0124479	0	14.6	504123	0.46	0.09
05-05-2021 11:57:00	18.2492	0	4.98	30	0	0.0124479	0	14.6	504123	0.46	0.09
05-05-2021 11:58:00	18.2658	0	4.98	30	0	0.0124479	0	14.6	504123	0.46	0.09
05-05-2021 11:59:00	18.2825	0	4.97	30	0	0.0124479	0	14.6	504123	0.46	0.09
05-05-2021 12:00:00	18.2992	0	4.97	30	0	0.0124479	0	14.6	504123	0.46	0.09
05-05-2021 12:01:00	18.3158	0	4.96	30	0	0.0124479	0	14.6	504123	0.46	0.09
05-05-2021 12:02:00	18.3325	0	4.96	30	0	0.0124479	0	14.6	504123	0.46	0.09
05-05-2021 12:03:00	18.3492	0	4.96	30	0	0.0124479	0	14.6	504123	0.46	0.09
05-05-2021 12:04:00	18.3658	0	4.98	30	0	0.0124479	0	14.6	504123	0.46	0.09
05-05-2021 12:05:00	18.3825	0	4.98	30	0	0.0124479	0	14.6	504123	0.46	0.09
05-05-2021 12:06:00	18.3992	0	4.97	30	0	0.0124479	0	14.6	504123	0.46	0.09
05-05-2021 12:07:00	18.4158	0	4.97	30	0	0.0124479	0	14.6	504123	0.46	0.09
05-05-2021 12:08:00	18.4325	0	4.97	30	0	0.0124479	0	14.6	504123	0.46	0.09
05-05-2021 12:09:00	18.4492	0	4.96	30	0	0.0124479	0	14.6	504123	0.48	0.08
05-05-2021 12:10:00	18.4658	0	4.96	30	0	0.0124479	0	14.6	504123	0.48	0.09
05-05-2021 12:11:00	18.4825	0	4.95	30	0	0.0124479	0	14.6	504123	0.48	0.09
05-05-2021 12:12:00	18.4992	0	4.96	30	0	0.0124479	0	15.1	504123	0.48	0.09
05-05-2021 12:13:00	18.5158	0	4.99	30	0	0.0124479	0	15.3	504123	0.48	0.09
05-05-2021 12:14:00	18.5325	0	4.99	30	0	0.0124479	0	15.3	504123	0.48	0.09
05-05-2021 12:15:00	18.5492	0	4.99	30	0	0.0124479	0	15.3	504123	0.48	0.09
05-05-2021 12:16:00	18.5658	0	4.98	30	0	0.0124479	0	15.3	504123	0.48	0.09
05-05-2021 12:17:00	18.5825	0	4.98	30	0	0.0124479	0	15.3	504123	0.48	0.09
05-05-2021 12:18:00	18.5992	0	4.97	30	0	0.0124479	0	15.3	504123	0.48	0.09
05-05-2021 12:19:00	18.6158	0	4.97	30	0	0.0124479	0	15.3	504123	0.48	0.09
05-05-2021 12:20:00	18.6325	0	4.97	30	0	0.0124479	0	15.3	504123	0.48	0.09
05-05-2021 12:21:00	18.6492	0	4.96	30	0	0.0124479	0	15.3	504123	0.48	0.09
05-05-2021 12:22:00	18.6658	0	4.96	30	0	0.0124479	0	15.3	504123	0.48	0.09
05-05-2021 12:23:00	18.6825	0	4.95	30	0	0.0124479	0	15.3	504123	0.48	0.09
05-05-2021 12:24:00	18.6992	0	4.95	30	0	0.0124479	0	15.4	504123	0.48	0.09
05-05-2021 12:25:00	18.7158	0	4.97	30	0	0.0124479	0	15.6	504123	0.48	0.09
05-05-2021 12:26:00	18.7325	0	4.97	30	0	0.0124479	0	15.6	504123	0.48	0.09
05-05-2021 12:27:00	18.7492	0	4.97	30	0	0.0124479	0	15.6	504123	0.51	0.08
05-05-2021 12:28:00	18.7658	0	4.96	30	0	0.0124479	0	15.6	504123	0.51	0.08
05-05-2021 12:29:00	18.7825	0	4.96	30	0	0.0124479	0	15.6	504123	0.51	0.08
05-05-2021 12:30:00	18.7992	0	4.95	30	0	0.0124479	0	15.6	504123	0.51	0.08
05-05-2021 12:31:00	18.8158	0	4.95	30	0	0.0124479	0	15.6	504123	0.51	0.08
05-05-2021 12:32:00	18.8325	0	4.99	30	0	0.0124479	0	16.6	504123	0.51	0.08
05-05-2021 12:33:00	18.8492	0	4.99	30	0	0.0124479	0	16.6	504123	0.51	0.08
05-05-2021 12:34:00	18.8658	0	4.98	30	0	0.0124479	0	16.6	504123	0.51	0.08
05-05-2021 12:35:00	18.8825	0	4.98	30	0	0.0124479	0	16.6	504123	0.51	0.08
05-05-2021 12:36:00	18.8992	0	4.98	30	0	0.0124479	0	16.6	504123	0.51	0.08
05-05-2021 12:37:00	18.9158	0	4.97	30	0	0.0124479	0	16.6	504123	0.51	0.08
05-05-2021 12:38:00	18.9325	0	4.97	30	0	0.0124479	0	16.6	504123	0.51	0.08
05-05-2021 12:39:00	18.9492	0	4.96	30	0	0.0124479	0	16.6	504123	0.51	0.08
05-05-2021 12:40:00	18.9658	0	4.96	30	0	0.0124479	0	16.6	504123	0.51	0.08
05-05-2021 12:41:00	18.9825	0	4.96	30	0	0.0124479	0	16.6	504123	0.51	0.08
05-05-2021 12:42:00	18.9992	0	4.95	30	0	0.0124479	0	16.6	504123	0.51	0.08
05-05-2021 12:43:00	19.0158	0	4.98	30	0	0.0124479	0	16.9	504123	0.51	0.08
05-05-2021 12:44:00	19.0325	0	4.97	30	0	0.0124479	0	16.9	504123	0.53	0.08
05-05-2021 12:45:00	19.0492	0	4.97	30	0	0.0124479	0	16.9	504123	0.53	0.08
05-05-2021 12:46:00	19.0658	0	4.96	30	0	0.0124479	0	16.9	504123	0.53	0.08
05-05-2021 12:47:00	19.0825	0	4.96	30	0	0.0124479	0	16.9	504123	0.53	0.08
05-05-2021 12:48:00	19.0992	0	4.96	30	0	0.0124479	0	16.9	504123	0.53	0.08
05-05-2021 12:49:00	19.1158	0	4.95	30	0	0.0124479	0	16.9	504123	0.53	0.08
05-05-2021 12:50:00	19.1325	0	4.98	30	0	0.0124479	0	17.2	504123	0.53	0.08
05-05-2021 12:51:00	19.1492	0	4.97	30	0	0.0124479	0	17.2	504123	0.53	0.08
05-05-2021 12:52:00	19.1658	0	4.97	30	0	0.0124479	0	17.2	504123	0.53	0.08
05-05-2021 12:53:00	19.1825	0	4.97	30	0	0.0124479	0	17.2	504123	0.53	0.08
05-05-2021 12:54:00	19.1992	0	4.96	30	0	0.0124479	0	17.2	504123	0.53	0.08
05-05-2021 12:55:00	19.2158	0	4.96	30	0	0.0124479	0	17.2	504123	0.53	0.08
05-05-2021 12:56:00	19.2325	0	4.95	30	0	0.0124479	0	17.2	504123	0.53	0.08
05-05-2021 12:57:00	19.2492	0	4.95	30	0	0.0124479	0	17.5	504123	0.53	0.08
05-05-2021 12:58:00	19.2658	0	4.97	30	0	0.0124479	0	17.5	504123	0.53	0.08
05-05-2021 12:59:00	19.2825	0	4.97	30	0	0.0124479	0	17.5	504123	0.53	0.08
05-05-2021 13:00:00	19.2992	0	4.97	30	0	0.0124479	0	17.5	504123	0.53	0.08
05-05-2021 13:01:00	19.3158	0	4.96	30	0	0.0124479	0	17.5	504123	0.53	0.08
05-05-2021 13:02:00	19.3325	0	4.96	30	0	0.0124479	0	17.5	504123	0.55	0.08
05-05-2021 13:03:00	19.3492	0	4.95	30	0	0.0124479	0	17.5	504123	0.55	0.08
05-05-2021 13:04:00	19.3658	0	4.99	30	0	0.0124479	0	18.4	504123	0.55	0.08
05-05-2021 13:05:00	19.3825	0	4.99	30	0	0.0124479	0	18.5	504123	0.55	0.08
05-05-2021 13:06:00	19.3992	0	4.98	30	0	0.0124479	0	18.5	504123	0.55	0.08
05-05-2021 13:07:00	19.4158	0	4.98	30	0	0.0124479	0	18.5	504123	0.55	0.08
05-05-2021 13:08:00	19.4325	0	4.98	30	0	0.0124479	0	18.5	504123	0.55	0.08
05-05-2021 13:09:00	19.4492	0	4.97	30	0	0.0124479	0	18.5	504123	0.55	0.08
05-05-2021 13:10:00	19.4658	0	4.97	30	0	0.0124479	0	18.5	504123	0.55	0.08
05-05-2021 13:11:00	19.4825	0	4.96	30	0	0.0124479	0	18.5	504123	0.55	0.08
05-05-2021 13:12:00	19.4992	0	4.96	30	0	0.0124479	0	18.5	504123	0.55	0.08
05-05-2021 13:13:00	19.5158	0	4.95	30	0	0.0124479	0	18.5	504123	0.55	0.08
05-05-2021 13:14:00	19.5325	0	4.98	30	0	0.0124479	0	18.8	504123	0.55	0.08
05-05-2021 13:15:00	19.5492	0	4.98	30	0	0.0124479	0	18.8	504123	0.55	0.08
05-05-2021 13:16:00	19.5658	0	4.97	30	0	0.0124479	0	18.8	504123	0.55	0.08
05-05-2021 13:17:00	19.5825	0	4.97	30	0	0.0124479	0	18.8	504123	0.55	0.08
05-05-2021 13:18:00	19.5992	0	4.96	30	0	0.0124479	0	18.8	504123	0.55	0.08
05-05-2021 13:19:00	19.6158	0	4.96	30	0	0.0124479	0	18.8	504123	0.58	0.08
05-05-2021 13:20:00	19.6325	0	4.95	30	0	0.0124479	0	18.8	504123	0.58	0.08
05-05-2021 13:21:00	19.6492	0	4.95	30	0	0.0124479	0	18.9	504123	0.58	0.08
05-05-2021 13:22:00	19.6658	0	4.99	30	0	0.0124479	0	19.1	504123	0.58	0.08
05-05-2021 13:23:00	19.6825	0	4.98	30	0	0.0124479	0	19.1	504123	0.58	0.08
05-05-2021 13:24:00	19.6992	0	4.98	30	0	0.0124479	0	19.1	504123	0.58	0.08
05-05-2021 13:25:00	19.7158	0	4.97	30	0	0.0124479	0	19.1	504123	0.58	0.08
05-05-2021 13:26:00	19.7325	0	4.97	30	0	0.0124479	0	19.1	504123	0.58	0.08
05-05-2021 13:27:00	19.7492	0	4.97	30	0	0.0124479	0	19.1	504123	0.58	0.08
05-05-2021 13:28:00	19.7658	0	4.96	30	0	0.0124479	0	19.1	504123	0.58	0.08
05-05-2021 13:29:00	19.7825	0	4.96	30	0	0.0124479	0	19.1	504123	0.58	0.08
05-05-2021 13:30:00	19.7992	0	4.95	30	0	0.0124479	0	19.1	504123	0.58	0.08
05-05-2021 13:31:00	19.8158	0	4.98	30	0	0.0124479	0	19.8	504123	0.58	0.08
05-05-2021 13:32:00	19.8325	0	4.97	30	0	0.0124479	0	19.8	504123	0.58	0.08
05-05-2021 13:33:00	19.8492	0	4.97	30	0	0.0124479	0	19.8	504123	0.58	0.08
05-05-2021 13:34:00	19.8658	0	4.96	30	0	0.0124479	0	19.8	504123	0.58	0.08
05-05-2021 13:35:00	19.8825	0	4.96	30	0	0.0124479	0	19.8	504123	0.58	0.08
05-05-2021 13:36:00	19.8992	0	4.95	30	0	0.0124479	0	19.8	504123	0.58	0.08
05-05-2021 13:37:00	19.9158	0	4.95	30	0	0.0124479	0	19.8	504123	0.61	0.08
05-05-2021 13:38:00	19.9325	0	4.99	30	0	0.0124479	0	20.5	504123	0.61	0.08
05-05-2021 13:39:00	19.9492	0	4.98	30	0	0.0124479	0	20.5	504123	0.61	0.08
05-05-2021 13:40:00	19.9658	0	4.98	30	0	0.0124479	0	20.5	504123	0.61	0.08
05-05-2021 13:41:00	19.9825	0	4.97	30	0	0.0124479	0	20.5	504123	0.61	0.08
05-05-2021 13:42:00	19.9992	0	4.97	30	0	0.0124479	0	20.5	504123	0.61	0.08
05-05-2021 13:43:00	20.0158	0	4.97	30	0	0.0124479	0	20.5	504123	0.61	0.08
05-05-2021 13:44:00	20.0325	0	4.96	30	0	0.0124479	0	20.5	504123	0.61	0.08
05-05-2021 13:45:00	20.0492	0	4.96	30	0	0.0124479	0	20.5	504123	0.61	0.08
05-05-2021 13:46:00	20.0658	0	4.95	30	0	0.0124479	0	20.5	504123	0.61	0.08
05-05-2021 13:47:00	20.0825	0	4.99	30	0	0.0124479	0	20.8	504123	0.61	0.08
05-05-2021 13:48:00	20.0992	0	4.98	30	0	0.0124479	0	20.8	504123	0.61	0.08
05-05-2021 13:49:00	20.1158	0	4.98	30	0	0.0124479	0	20.8	504123	0.61	0.08
05-05-2021 13:50:00	20.1325	0	4.97	30	0	0.0124479	0	20.8	504123	0.61	0.08
05-05-2021 13:51:00	20.1492	0	4.97	30	0	0.0124479	0	20.8	504123	0.61	0.08
05-05-2021 13:52:00	20.1658	0	4.96	30	0	0.0124479	0	20.8	504123	0.61	0.08
05-05-2021 13:53:00	20.1825	0	4.96	30	0	0.0124479	0	20.8	504123	0.61	0.08
05-05-2021 13:54:00	20.1992	0	4.96	30	0	0.0124479	0	20.8	504123	0.63	0.08
05-05-2021 13:55:00	20.2158	0	4.95	30	0	0.0124479	0	20.8	504123	0.64	0.08
05-05-2021 13:56:00	20.2325	0	4.99	30	0	0.0124479	0	21.5	504123	0.64	0.08
05-05-2021 13:57:00	20.2492	0	4.99	30	0	0.0124479	0	21.5	504123	0.64	0.08
05-05-2021 13:58:00	20.2658	0	4.98	30	0	0.0124479	0	21.5	504123	0.64	0.08
05-05-2021 13:59:00	20.2825	0	4.98	30	0	0.0124479	0	21.5	504123	0.64	0.08
05-05-2021 14:00:00	20.2992	0	4.97	30	0	0.0124479	0	21.5	504123	0.64	0.08
05-05-2021 14:01:00	20.3158	0	4.97	30	0	0.0124479	0	21.5	504123	0.64	0.08
05-05-2021 14:02:00	20.3325	0	4.96	30	0	0.0124479	0	21.5	504123	0.64	0.08
05-05-2021 14:03:00	20.3492	0	4.96	30	0	0.0124479	0	21.5	504123	0.64	0.08
05-05-2021 14:04:00	20.3658	0	4.95	30	0	0.0124479	0	21.5	504123	0.64	0.08
05-05-2021 14:05:00	20.3825	0	4.98	30	0	0.0124479	0	22.2	504123	0.64	0.08
05-05-2021 14:06:00	20.3992	0	4.97	30	0	0.0124479	0	22.2	504123	0.64	0.08
05-05-2021 14:07:00	20.4158	0	4.97	30	0	0.0124479	0	22.2	504123	0.64	0.08
05-05-2021 14:08:00	20.4325	0	4.96	30	0	0.0124479	0	22.2	504123	0.64	0.08
05-05-2021 14:09:00	20.4492	0	4.96	30	0	0.0124479	0	22.2	504123	0.64	0.08
05-05-2021 14:10:00	20.4658	0	4.95	30	0	0.0124479	0	22.2	504123	0.64	0.08
05-05-2021 14:11:00	20.4825	0	4.99	30	0	0.0124479	0	22.5	504123	0.64	0.08
05-05-2021 14:12:00	20.4992	0	4.98	30	0	0.0124479	0	22.5	504123	0.67	0.08
05-05-2021 14:13:00	20.5158	0	4.98	30	0	0.0124479	0	22.5	504123	0.67	0.08
05-05-2021 14:14:00	20.5325	0	4.97	30	0	0.0124479	0	22.5	504123	0.67	0.08
05-05-2021 14:15:00	20.5492	0	4.97	30	0	0.0124479	0	22.5	504123	0.67	0.08
05-05-2021 14:16:00	20.5658	0	4.96	30	0	0.0124479	0	22.5	504123	0.67	0.08
05-05-2021 14:17:00	20.5825	0	4.96	30	0	0.0124479	0	22.5	504123	0.67	0.08
05-05-2021 14:18:00	20.5992	0	4.95	30	0	0.0124479	0	22.5	504123	0.67	0.08
05-05-2021 14:19:00	20.6158	0	4.99	30	0	0.0124479	0	23.2	504123	0.67	0.08
05-05-2021 14:20:00	20.6325	0	4.98	30	0	0.0124479	0	23.2	504123	0.67	0.08
05-05-2021 14:21:00	20.6492	0	4.98	30	0	0.0124479	0	23.2	504123	0.67	0.08
05-05-2021 14:22:00	20.6658	0	4.97	30	0	0.0124479	0	23.2	504123	0.67	0.08
05-05-2021 14:23:00	20.6825	0	4.97	30	0	0.0124479	0	23.2	504123	0.67	0.08
05-05-2021 14:24:00	20.6992	0	4.96	30	0	0.0124479	0	23.2	504123	0.67	0.08
05-05-2021 14:25:00	20.7158	0	4.96	30	0	0.0124479	0	23.2	504123	0.67	0.08
05-05-2021 14:26:00	20.7325	0	4.95	30	0	0.0124479	0	23.2	504123	0.67	0.08
05-05-2021 14:27:00	20.7492	0	4.98	30	0	0.0124479	0	23.5	504123	0.67	0.08
05-05-2021 14:28:00	20.7658	0	4.97	30	0	0.0124479	0	23.5	504123	0.67	0.08
05-05-2021 14:29:00	20.7825	0	4.96	30	0	0.0124479	0	23.5	504123	0.7	0.08
05-05-2021 14:30:00	20.7992	0	4.96	30	0	0.0124479	0	23.5	504123	0.7	0.08
05-05-2021 14:31:00	20.8158	0	4.95	30	0	0.0124479	0	23.5	504123	0.7	0.08
05-05-2021 14:32:00	20.8325	0	4.95	30	0	0.0124479	0	23.8	504123	0.7	0.08
05-05-2021 14:33:00	20.8492	0	4.97	30	0	0.0124479	0	24.2	504123	0.7	0.08
05-05-2021 14:34:00	20.8658	0	4.97	30	0	0.0124479	0	24.2	504123	0.7	0.08
05-05-2021 14:35:00	20.8825	0	4.96	30	0	0.0124479	0	24.2	504123	0.7	0.08
05-05-2021 14:36:00	20.8992	0	4.96	30	0	0.0124479	0	24.2	504123	0.7	0.08
05-05-2021 14:37:00	20.9158	0	4.95	30	0	0.0124479	0	24.2	504123	0.7	0.08
05-05-2021 14:38:00	20.9325	0	4.99	30	0	0.0124479	0	24.5	504123	0.7	0.08
05-05-2021 14:39:00	20.9492	0	4.98	30	0	0.0124479	0	24.5	504123	0.7	0.08
05-05-2021 14:40:00	20.9658	0	4.98	30	0	0.0124479	0	24.5	504123	0.7	0.08
05-05-2021 14:41:00	20.9825	0	4.97	30	0	0.0124479	0	24.5	504123	0.7	0.08
05-05-2021 14:42:00	20.9992	0	4.96	30	0	0.0124479	0	24.5	504123	0.7	0.08
05-05-2021 14:43:00	21.0158	0	4.96	30	0	0.0124479	0	24.5	504123	0.7	0.08
05-05-2021 14:44:00	21.0325	0	4.95	30	0	0.0124479	0	24.5	504123	0.7	0.08
05-05-2021 14:45:00	21.0492	0	4.95	30	0	0.0124479	0	24.8	504123	0.7	0.08
05-05-2021 14:46:00	21.0658	0	5	30	0	0.0124479	0	25.2	504123	0.7	0.08
05-05-2021 14:47:00	21.0825	0	5	30	0	0.0124479	0	25.2	504123	0.73	0.08
05-05-2021 14:48:00	21.0992	0	4.99	30	0	0.0124479	0	25.2	504123	0.73	0.08
05-05-2021 14:49:00	21.1158	0	4.99	30	0	0.0124479	0	25.2	504123	0.73	0.08
05-05-2021 14:50:00	21.1325	0	4.98	30	0	0.0124479	0	25.2	504123	0.73	0.08
05-05-2021 14:51:00	21.1492	0	4.98	30	0	0.0124479	0	25.2	504123	0.73	0.08
05-05-2021 14:52:00	21.1658	0	4.97	30	0	0.0124479	0	25.2	504123	0.73	0.08
05-05-2021 14:53:00	21.1825	0	4.97	30	0	0.0124479	0	25.2	504123	0.73	0.08
05-05-2021 14:54:00	21.1992	0	4.96	30	0	0.0124479	0	25.2	504123	0.73	0.08
05-05-2021 14:55:00	21.2158	0	4.96	30	0	0.0124479	0	25.2	504123	0.73	0.08
05-05-2021 14:56:00	21.2325	0	4.95	30	0	0.0124479	0	25.2	504123	0.73	0.08
05-05-2021 14:57:00	21.2492	0	4.97	30	0	0.0124479	0	25.9	504123	0.73	0.08
05-05-2021 14:58:00	21.2658	0	4.97	30	0	0.0124479	0	25.9	504123	0.73	0.08
05-05-2021 14:59:00	21.2825	0	4.96	30	0	0.0124479	0	25.9	504123	0.73	0.08
05-05-2021 15:00:00	21.2992	0	4.96	30	0	0.0124479	0	25.9	504123	0.73	0.08
05-05-2021 15:01:00	21.3158	0	4.95	30	0	0.0124479	0	25.9	504123	0.73	0.08
05-05-2021 15:02:00	21.3325	0	5	30	0	0.0124479	0	26.6	504123	0.73	0.08
05-05-2021 15:03:00	21.3492	0	5	30	0	0.0124479	0	26.6	504123	0.73	0.08
05-05-2021 15:04:00	21.3658	0	4.99	30	0	0.0124479	0	26.6	504123	0.76	0.06
05-05-2021 15:05:00	21.3825	0	4.99	30	0	0.0124479	0	26.6	504123	0.76	0.06
05-05-2021 15:06:00	21.3992	0	4.98	30	0	0.0124479	0	26.6	504123	0.76	0.06
05-05-2021 15:07:00	21.4158	0	4.98	30	0	0.0124479	0	26.6	504123	0.76	0.06
05-05-2021 15:08:00	21.4325	0	4.97	30	0	0.0124479	0	26.6	504123	0.76	0.06
05-05-2021 15:09:00	21.4492	0	4.96	30	0	0.0124479	0	26.6	504123	0.76	0.06
05-05-2021 15:10:00	21.4658	0	4.96	30	0	0.0124479	0	26.6	504123	0.76	0.06
05-05-2021 15:11:00	21.4825	0	4.95	30	0	0.0124479	0	26.6	504123	0.76	0.06
05-05-2021 15:12:00	21.4992	0	5.01	30	0	0.0124479	0	27.3	504123	0.76	0.06
05-05-2021 15:13:00	21.5158	0	5	30	0	0.0124479	0	27.3	504123	0.76	0.06
05-05-2021 15:14:00	21.5325	0	5	30	0	0.0124479	0	27.3	504123	0.76	0.06
05-05-2021 15:15:00	21.5492	0	4.99	30	0	0.0124479	0	27.3	504123	0.76	0.06
05-05-2021 15:16:00	21.5658	0	4.99	30	0	0.0124479	0	27.3	504123	0.76	0.06
05-05-2021 15:17:00	21.5825	0	4.98	30	0	0.0124479	0	27.3	504123	0.76	0.06
05-05-2021 15:18:00	21.5992	0	4.98	30	0	0.0124479	0	27.3	504123	0.76	0.06
05-05-2021 15:19:00	21.6158	0	4.97	30	0	0.0124479	0	27.3	504123	0.76	0.06
05-05-2021 15:20:00	21.6325	0	4.96	30	0	0.0124479	0	27.3	504123	0.76	0.06
05-05-2021 15:21:00	21.6492	0	4.96	30	0	0.0124479	0	27.3	504123	0.76	0.06
05-05-2021 15:22:00	21.6658	0	4.95	30	0	0.0124479	0	27.3	504123	0.79	0.06
05-05-2021 15:23:00	21.6825	0	4.97	30	0	0.0124479	0	28.2	504123	0.79	0.06
05-05-2021 15:24:00	21.6992	0	4.97	30	0	0.0124479	0	28.3	504123	0.79	0.06
05-05-2021 15:25:00	21.7158	0	4.96	30	0	0.0124479	0	28.3	504123	0.79	0.06
05-05-2021 15:26:00	21.7325	0	4.98	30	0	0.0124479	0	28.3	504123	0.79	0.06
05-05-2021 15:27:00	21.7492	0	4.98	30	0	0.0124479	0	28.3	504123	0.79	0.06
05-05-2021 15:28:00	21.7658	0	4.97	30	0	0.0124479	0	28.3	504123	0.79	0.06
05-05-2021 15:29:00	21.7825	0	4.96	30	0	0.0124479	0	28.3	504123	0.79	0.06
05-05-2021 15:30:00	21.7992	0	4.96	30	0	0.0124479	0	28.3	504123	0.79	0.06
05-05-2021 15:31:00	21.8158	0	4.95	30	0	0.0124479	0	28.3	504123	0.79	0.06
05-05-2021 15:32:00	21.8325	0	4.99	30	0	0.0124479	0	29	504123	0.79	0.06
05-05-2021 15:33:00	21.8492	0	4.98	30	0	0.0124479	0	29	504123	0.79	0.06
05-05-2021 15:34:00	21.8658	0	4.98	30	0	0.0124479	0	29	504123	0.79	0.06
05-05-2021 15:35:00	21.8825	0	4.97	30	0	0.0124479	0	29	504123	0.79	0.06
05-05-2021 15:36:00	21.8992	0	4.96	30	0	0.0124479	0	29	504123	0.79	0.06
05-05-2021 15:37:00	21.9158	0	4.96	30	0	0.0124479	0	29	504123	0.79	0.06
05-05-2021 15:38:00	21.9325	0	4.95	30	0	0.0124479	0	29	504123	0.79	0.06
05-05-2021 15:39:00	21.9492	0	4.97	30	0	0.0124479	0	29.3	504123	0.79	0.06
05-05-2021 15:40:00	21.9658	0	4.97	30	0	0.0124479	0	29.3	504123	0.83	0.06
05-05-2021 15:41:00	21.9825	0	4.96	30	0	0.0124479	0	29.3	504123	0.83	0.06
05-05-2021 15:42:00	21.9992	0	4.96	30	0	0.0124479	0	29.3	504123	0.83	0.06
05-05-2021 15:43:00	22.0158	0	4.97	30	0	0.0124479	0	29.6	504123	0.83	0.06
05-05-2021 15:44:00	22.0325	0	4.97	30	0	0.0124479	0	29.6	504123	0.83	0.06
05-05-2021 15:45:00	22.0492	0	4.96	30	0	0.0124479	0	29.6	504123	0.83	0.06
05-05-2021 15:46:00	22.0658	0	4.96	30	0	0.0124479	0	29.6	504123	0.83	0.06
05-05-2021 15:47:00	22.0825	0	4.95	30	0	0.0124479	0	29.6	504123	0.83	0.06
05-05-2021 15:48:00	22.0992	0	4.99	30	0	0.0124479	0	30.6	504123	0.83	0.06
05-05-2021 15:49:00	22.1158	0	4.98	30	0	0.0124479	0	30.6	504123	0.83	0.06
05-05-2021 15:50:00	22.1325	0	5	30	0	0.0124479	0	30.6	504123	0.83	0.06
05-05-2021 15:51:00	22.1492	0	4.99	30	0	0.0124479	0	30.6	504123	0.83	0.06
05-05-2021 15:52:00	22.1658	0	4.99	30	0	0.0124479	0	30.6	504123	0.83	0.06
05-05-2021 15:53:00	22.1825	0	4.98	30	0	0.0124479	0	30.6	504123	0.83	0.06
05-05-2021 15:54:00	22.1992	0	4.97	30	0	0.0124479	0	30.6	504123	0.83	0.06
05-05-2021 15:55:00	22.2158	0	4.97	30	0	0.0124479	0	30.6	504123	0.83	0.06
05-05-2021 15:56:00	22.2325	0	4.96	30	0	0.0124479	0	30.6	504123	0.83	0.06
05-05-2021 15:57:00	22.2492	0	4.96	30	0	0.0124479	0	30.6	504123	0.86	0.06
05-05-2021 15:58:00	22.2658	0	4.95	30	0	0.0124479	0	30.6	504123	0.86	0.06
05-05-2021 15:59:00	22.2825	0	4.99	30	0	0.0124479	0	31.3	504123	0.86	0.06
05-05-2021 16:00:00	22.2992	0	4.98	30	0	0.0124479	0	31.3	504123	0.86	0.06
05-05-2021 16:01:00	22.3158	0	4.97	30	0	0.0124479	0	31.3	504123	0.86	0.06
05-05-2021 16:02:00	22.3325	0	4.97	30	0	0.0124479	0	31.3	504123	0.86	0.06
05-05-2021 16:03:00	22.3492	0	4.96	30	0	0.0124479	0	31.3	504123	0.86	0.06
05-05-2021 16:04:00	22.3658	0	4.95	30	0	0.0124479	0	31.3	504123	0.86	0.06
05-05-2021 16:05:00	22.3825	0	4.97	30	0	0.0124479	0	31.6	504123	0.86	0.06
05-05-2021 16:06:00	22.3992	0	4.97	30	0	0.0124479	0	31.6	504123	0.86	0.06
05-05-2021 16:07:00	22.4158	0	4.96	30	0	0.0124479	0	31.6	504123	0.86	0.06
05-05-2021 16:08:00	22.4325	0	4.96	30	0	0.0124479	0	31.6	504123	0.86	0.06
05-05-2021 16:09:00	22.4492	0	4.95	30	0	0.0124479	0	31.9	504123	0.86	0.06
05-05-2021 16:10:00	22.4658	0	4.97	30	0	0.0124479	0	32.3	504123	0.86	0.06
05-05-2021 16:11:00	22.4825	0	4.96	30	0	0.0124479	0	32.3	504123	0.86	0.06
05-05-2021 16:12:00	22.4992	0	4.96	30	0	0.0124479	0	32.3	504123	0.86	0.06
05-05-2021 16:13:00	22.5158	0	4.95	30	0	0.0124479	0	32.3	504123	0.86	0.06
05-05-2021 16:14:00	22.5325	0	4.98	30	0	0.0124479	0	32.6	504123	0.9	0.06
05-05-2021 16:15:00	22.5492	0	4.98	30	0	0.0124479	0	32.6	504123	0.9	0.06
05-05-2021 16:16:00	22.5658	0	4.97	30	0	0.0124479	0	32.6	504123	0.9	0.06
05-05-2021 16:17:00	22.5825	0	4.96	30	0	0.0124479	0	32.6	504123	0.9	0.06
05-05-2021 16:18:00	22.5992	0	4.96	30	0	0.0124479	0	32.6	504123	0.9	0.06
05-05-2021 16:19:00	22.6158	0	4.95	30	0	0.0124479	0	32.6	504123	0.9	0.06
05-05-2021 16:20:00	22.6325	0	4.99	30	0	0.0124479	0	33.3	504123	0.9	0.06
05-05-2021 16:21:00	22.6492	0	4.98	30	0	0.0124479	0	33.3	504123	0.9	0.06
05-05-2021 16:22:00	22.6658	0	4.97	30	0	0.0124479	0	33.3	504123	0.9	0.06
05-05-2021 16:23:00	22.6825	0	4.97	30	0	0.0124479	0	33.3	504123	0.9	0.06
05-05-2021 16:24:00	22.6992	0	4.96	30	0	0.0124479	0	33.3	504123	0.9	0.06
05-05-2021 16:25:00	22.7158	0	4.95	30	0	0.0124479	0	33.3	504123	0.9	0.06
05-05-2021 16:26:00	22.7325	0	4.97	30	0	0.0124479	0	33.6	504123	0.9	0.06
05-05-2021 16:27:00	22.7492	0	4.97	30	0	0.0124479	0	33.6	504123	0.9	0.06
05-05-2021 16:28:00	22.7658	0	4.96	30	0	0.0124479	0	33.6	504123	0.9	0.06
05-05-2021 16:29:00	22.7825	0	4.95	30	0	0.0124479	0	33.6	504123	0.9	0.06
05-05-2021 16:30:00	22.7992	0	4.95	30	0	0.0124479	0	33.9	504123	0.9	0.06
05-05-2021 16:31:00	22.8158	0	4.97	30	0	0.0124479	0	34.3	504123	0.9	0.06
05-05-2021 16:32:00	22.8325	0	4.96	30	0	0.0124479	0	34.3	504123	0.96	0.06
05-05-2021 16:33:00	22.8492	0	4.96	30	0	0.0124479	0	34.3	504123	0.96	0.06
05-05-2021 16:34:00	22.8658	0	4.95	30	0	0.0124479	0	34.6	504123	0.96	0.06
05-05-2021 16:35:00	22.8825	0	4.98	30	0	0.0124479	0	34.6	504123	0.96	0.06
05-05-2021 16:36:00	22.8992	0	4.98	30	0	0.0124479	0	34.6	504123	0.96	0.06
05-05-2021 16:37:00	22.9158	0	4.97	30	0	0.0124479	0	34.6	504123	0.96	0.06
05-05-2021 16:38:00	22.9325	0	4.96	30	0	0.0124479	0	34.6	504123	0.96	0.06
05-05-2021 16:39:00	22.9492	0	4.96	30	0	0.0124479	0	34.6	504123	0.96	0.06
05-05-2021 16:40:00	22.9658	0	4.95	30	0	0.0124479	0	34.9	504123	0.96	0.06
05-05-2021 16:41:00	22.9825	0	4.98	30	0	0.0124479	0	35.3	504123	0.96	0.06
05-05-2021 16:42:00	22.9992	0	4.97	30	0	0.0124479	0	35.3	504123	0.96	0.06
05-05-2021 16:43:00	23.0158	0	4.97	30	0	0.0124479	0	35.3	504123	0.96	0.06
05-05-2021 16:44:00	23.0325	0	4.96	30	0	0.0124479	0	35.3	504123	0.96	0.06
05-05-2021 16:45:00	23.0492	0	4.95	30	0	0.0124479	0	35.3	504123	0.96	0.06
05-05-2021 16:46:00	23.0658	0	4.97	30	0	0.0124479	0	35.6	504123	0.96	0.06
05-05-2021 16:47:00	23.0825	0	4.97	30	0	0.0124479	0	35.6	504123	0.96	0.06
05-05-2021 16:48:00	23.0992	0	4.96	30	0	0.0124479	0	35.6	504123	0.96	0.06
05-05-2021 16:49:00	23.1158	0	4.95	30	0	0.0124479	0	35.6	504123	1	0.06
05-05-2021 16:50:00	23.1325	0	4.97	30	0	0.0124479	0	36.3	504123	1	0.06
05-05-2021 16:51:00	23.1492	0	4.97	30	0	0.0124479	0	36.3	504123	1	0.06
05-05-2021 16:52:00	23.1658	0	4.96	30	0	0.0124479	0	36.3	504123	1	0.06
05-05-2021 16:53:00	23.1825	0	4.96	30	0	0.0124479	0	36.3	504123	1	0.06
05-05-2021 16:54:00	23.1992	0	4.95	30	0	0.0124479	0	36.6	504123	1	0.06
05-05-2021 16:55:00	23.2158	0	4.98	30	0	0.0124479	0	36.6	504123	1	0.06
05-05-2021 16:56:00	23.2325	0	4.97	30	0	0.0124479	0	36.6	504123	1	0.06
05-05-2021 16:57:00	23.2492	0	4.97	30	0	0.0124479	0	36.6	504123	1	0.06
05-05-2021 16:58:00	23.2658	0	4.96	30	0	0.0124479	0	36.6	504123	1	0.06
05-05-2021 16:59:00	23.2825	0	4.95	30	0	0.0124479	0	36.6	504123	1	0.06
05-05-2021 17:00:00	23.2992	0	4.98	30	0	0.0124479	0	37.3	504123	1	0.06
05-05-2021 17:01:00	23.3158	0	4.98	30	0	0.0124479	0	37.3	504123	1	0.06
05-05-2021 17:02:00	23.3325	0	4.97	30	0	0.0124479	0	37.3	504123	1	0.06
05-05-2021 17:03:00	23.3492	0	4.96	30	0	0.0124479	0	37.3	504123	1	0.06
05-05-2021 17:04:00	23.3658	0	4.96	30	0	0.0124479	0	37.3	504123	1	0.06
05-05-2021 17:05:00	23.3825	0	4.97	30	0	0.0124479	0	37.3	504123	1	0.06
05-05-2021 17:06:00	23.3992	0	4.97	30	0	0.0124479	0	37.3	504123	1	0.06
05-05-2021 17:07:00	23.4158	0	4.96	30	0	0.0124479	0	37.3	504123	1.05	0.06
05-05-2021 17:08:00	23.4325	0	4.95	30	0	0.0124479	0	37.3	504123	1.05	0.06
05-05-2021 17:09:00	23.4492	0	4.96	30	0	0.0124479	0	38.2	504123	1.05	0.06
05-05-2021 17:10:00	23.4658	0	4.98	30	0	0.0124479	0	38.3	504123	1.05	0.06
05-05-2021 17:11:00	23.4825	0	4.97	30	0	0.0124479	0	38.3	504123	1.05	0.06
05-05-2021 17:12:00	23.4992	0	4.97	30	0	0.0124479	0	38.3	504123	1.05	0.06
05-05-2021 17:13:00	23.5158	0	4.96	30	0	0.0124479	0	38.3	504123	1.05	0.06
05-05-2021 17:14:00	23.5325	0	4.95	30	0	0.0124479	0	38.3	504123	1.05	0.06
05-05-2021 17:15:00	23.5492	0	5.01	30	0	0.0124479	0	39	504123	1.05	0.06
05-05-2021 17:16:00	23.5658	0	5	30	0	0.0124479	0	39	504123	1.05	0.06
05-05-2021 17:17:00	23.5825	0	4.99	30	0	0.0124479	0	39	504123	1.05	0.06
05-05-2021 17:18:00	23.5992	0	4.99	30	0	0.0124479	0	39	504123	1.05	0.06
05-05-2021 17:19:00	23.6158	0	4.98	30	0	0.0124479	0	39	504123	1.05	0.06
05-05-2021 17:20:00	23.6325	0	4.97	30	0	0.0124479	0	39	504123	1.05	0.06
05-05-2021 17:21:00	23.6492	0	4.96	30	0	0.0124479	0	39	504123	1.05	0.06
05-05-2021 17:22:00	23.6658	0	4.96	30	0	0.0124479	0	39	504123	1.05	0.06
05-05-2021 17:23:00	23.6825	0	4.95	30	0	0.0124479	0	39	504123	1.05	0.06
05-05-2021 17:24:00	23.6992	0	4.97	30	0	0.0124479	0	39.7	504123	1.1	0.06
05-05-2021 17:25:00	23.7158	0	4.96	30	0	0.0124479	0	39.7	504123	1.1	0.06
05-05-2021 17:26:00	23.7325	0	4.96	30	0	0.0124479	0	39.7	504123	1.1	0.06
05-05-2021 17:27:00	23.7492	0	4.95	30	0	0.0124479	0	39.7	504123	1.1	0.06
05-05-2021 17:28:00	23.7658	0	4.98	30	0	0.0124479	0	40.4	504123	1.1	0.06
05-05-2021 17:29:00	23.7825	0	4.97	30	0	0.0124479	0	40.4	504123	1.1	0.06
05-05-2021 17:30:00	23.7992	0	4.97	30	0	0.0124479	0	40.4	504123	1.1	0.06
05-05-2021 17:31:00	23.8158	0	4.96	30	0	0.0124479	0	40.4	504123	1.1	0.06
05-05-2021 17:32:00	23.8325	0	4.95	30	0	0.0124479	0	40.4	504123	1.1	0.06
05-05-2021 17:33:00	23.8492	0	4.97	30	0	0.0124479	0	40.7	504123	1.1	0.06
05-05-2021 17:34:00	23.8658	0	4.96	30	0	0.0124479	0	40.7	504123	1.1	0.06
05-05-2021 17:35:00	23.8825	0	4.96	30	0	0.0124479	0	40.7	504123	1.1	0.06
05-05-2021 17:36:00	23.8992	0	4.95	30	0	0.0124479	0	41	504123	1.1	0.06
05-05-2021 17:37:00	23.9158	0	4.98	30	0	0.0124479	0	41	504123	1.1	0.06
05-05-2021 17:38:00	23.9325	0	4.97	30	0	0.0124479	0	41	504123	1.1	0.06
05-05-2021 17:39:00	23.9492	0	4.97	30	0	0.0124479	0	41	504123	1.1	0.06
05-05-2021 17:40:00	23.9658	0	4.96	30	0	0.0124479	0	41	504123	1.1	0.06
05-05-2021 17:41:00	23.9825	0	4.95	30	0	0.0124479	0	41	504123	1.1	0.06
05-05-2021 17:42:00	23.9992	0	4.97	30	0	0.0124479	0	41.7	504123	1.15	0.06
05-05-2021 17:43:00	24.0158	0	4.96	30	0	0.0124479	0	41.7	504123	1.15	0.06
05-05-2021 17:44:00	24.0325	0	4.96	30	0	0.0124479	0	41.7	504123	1.15	0.06
05-05-2021 17:45:00	24.0492	0	4.95	30	0	0.0124479	0	41.7	504123	1.15	0.06
05-05-2021 17:46:00	24.0658	0	5	30	0	0.0124479	0	42.4	504123	1.15	0.06
05-05-2021 17:47:00	24.0825	0	4.99	30	0	0.0124479	0	42.4	504123	1.15	0.06
05-05-2021 17:48:00	24.0992	0	4.98	30	0	0.0124479	0	42.4	504123	1.15	0.06
05-05-2021 17:49:00	24.1158	0	4.98	30	0	0.0124479	0	42.4	504123	1.15	0.06
05-05-2021 17:50:00	24.1325	0	4.97	30	0	0.0124479	0	42.4	504123	1.15	0.06
05-05-2021 17:51:00	24.1492	0	4.96	30	0	0.0124479	0	42.4	504123	1.15	0.06
05-05-2021 17:52:00	24.1658	0	4.95	30	0	0.0124479	0	42.4	504123	1.15	0.06
05-05-2021 17:53:00	24.1825	0	5	30	0	0.0124479	0	43.1	504123	1.15	0.06
05-05-2021 17:54:00	24.1992	0	5	30	0	0.0124479	0	43.1	504123	1.15	0.06
05-05-2021 17:55:00	24.2158	0	4.99	30	0	0.0124479	0	43.1	504123	1.15	0.06
05-05-2021 17:56:00	24.2325	0	4.98	30	0	0.0124479	0	43.1	504123	1.15	0.06
05-05-2021 17:57:00	24.2492	0	4.97	30	0	0.0124479	0	43.1	504123	1.15	0.06
05-05-2021 17:58:00	24.2658	0	4.97	30	0	0.0124479	0	43.1	504123	1.15	0.06
05-05-2021 17:59:00	24.2825	0	4.96	30	0	0.0124479	0	43.1	504123	1.15	0.06
05-05-2021 18:00:00	24.2992	0	4.95	30	0	0.0124479	0	43.1	504123	1.2	0.06
05-05-2021 18:01:00	24.3158	0	4.97	30	0	0.0124479	0	43.4	504123	1.2	0.06
05-05-2021 18:02:00	24.3325	0	4.96	30	0	0.0124479	0	43.4	504123	1.2	0.06
05-05-2021 18:03:00	24.3492	0	4.96	30	0	0.0124479	0	43.4	504123	1.2	0.06
05-05-2021 18:04:00	24.3658	0	4.95	30	0	0.0124479	0	43.7	504123	1.2	0.06
05-05-2021 18:05:00	24.3825	0	4.99	30	0	0.0124479	0	44.4	504123	1.2	0.06
05-05-2021 18:06:00	24.3992	0	4.98	30	0	0.0124479	0	44.4	504123	1.2	0.06
05-05-2021 18:07:00	24.4158	0	4.97	30	0	0.0124479	0	44.4	504123	1.2	0.06
05-05-2021 18:08:00	24.4325	0	4.96	30	0	0.0124479	0	44.4	504123	1.2	0.06
05-05-2021 18:09:00	24.4492	0	4.96	30	0	0.0124479	0	44.4	504123	1.2	0.06
05-05-2021 18:10:00	24.4658	0	4.95	30	0	0.0124479	0	44.7	504123	1.2	0.06
05-05-2021 18:11:00	24.4825	0	5	30	0	0.0124479	0	45.1	504123	1.2	0.06
05-05-2021 18:12:00	24.4992	0	4.99	30	0	0.0124479	0	45.1	504123	1.2	0.06
05-05-2021 18:13:00	24.5158	0	4.98	30	0	0.0124479	0	45.1	504123	1.2	0.06
05-05-2021 18:14:00	24.5325	0	4.98	30	0	0.0124479	0	45.1	504123	1.2	0.06
05-05-2021 18:15:00	24.5492	0	4.97	30	0	0.0124479	0	45.1	504123	1.2	0.06
05-05-2021 18:16:00	24.5658	0	4.96	30	0	0.0124479	0	45.1	504123	1.2	0.06
05-05-2021 18:17:00	24.5825	0	4.95	30	0	0.0124479	0	45.1	504123	1.24	0.05
05-05-2021 18:18:00	24.5992	0	4.97	30	0	0.0124479	0	45.8	504123	1.24	0.05
05-05-2021 18:19:00	24.6158	0	4.96	29.9	0	0.0124479	0	45.8	504123	1.24	0.05
05-05-2021 18:20:00	24.6325	0	4.95	29.9	0	0.0124479	0	45.8	504123	1.24	0.05
05-05-2021 18:21:00	24.6492	0	4.97	29.9	0	0.0124479	0	46.1	504123	1.24	0.05
05-05-2021 18:22:00	24.6658	0	4.96	29.9	0	0.0124479	0	46.1	504123	1.24	0.05
05-05-2021 18:23:00	24.6825	0	4.96	29.9	0	0.0124479	0	46.1	504123	1.24	0.05
05-05-2021 18:24:00	24.6992	0	4.95	30	0	0.0124479	0	46.4	504123	1.24	0.05
05-05-2021 18:25:00	24.7158	0	4.96	30	0	0.0124479	0	46.4	504123	1.24	0.05
05-05-2021 18:26:00	24.7325	0	4.95	30	0	0.0124479	0	46.4	504123	1.24	0.05
05-05-2021 18:27:00	24.7492	0	4.97	30	0	0.0124479	0	46.7	504123	1.24	0.05
05-05-2021 18:28:00	24.7658	0	4.96	30	0	0.0124479	0	46.7	504123	1.24	0.05
05-05-2021 18:29:00	24.7825	0	4.96	30	0	0.0124479	0	46.7	504123	1.24	0.05
05-05-2021 18:30:00	24.7992	0	4.95	30	0	0.0124479	0	46.7	504123	1.24	0.05
05-05-2021 18:31:00	24.8158	0	5	30	0	0.0124479	0	47.4	504123	1.24	0.05
05-05-2021 18:32:00	24.8325	0	4.99	30	0	0.0124479	0	47.4	504123	1.24	0.05
05-05-2021 18:33:00	24.8492	0	4.98	30	0	0.0124479	0	47.4	504123	1.24	0.05
05-05-2021 18:34:00	24.8658	0	4.98	30	0	0.0124479	0	47.4	504123	1.29	0.06
05-05-2021 18:35:00	24.8825	0	4.97	30	0	0.0124479	0	47.4	504123	1.29	0.06
05-05-2021 18:36:00	24.8992	0	4.96	30	0	0.0124479	0	47.4	504123	1.29	0.06
05-05-2021 18:37:00	24.9158	0	4.95	30	0	0.0124479	0	47.4	504123	1.29	0.06
05-05-2021 18:38:00	24.9325	0	4.97	30	0	0.0124479	0	48.3	504123	1.29	0.06
05-05-2021 18:39:00	24.9492	0	4.98	30	0	0.0124479	0	48.4	504123	1.29	0.06
05-05-2021 18:40:00	24.9658	0	4.97	30	0	0.0124479	0	48.4	504123	1.29	0.06
05-05-2021 18:41:00	24.9825	0	4.97	30	0	0.0124479	0	48.4	504123	1.29	0.06
05-05-2021 18:42:00	24.9992	0	4.96	30	0	0.0124479	0	48.4	504123	1.29	0.06
05-05-2021 18:43:00	25.0158	0	4.95	30	0	0.0124479	0	48.4	504123	1.29	0.06
05-05-2021 18:44:00	25.0325	0	4.97	30	0	0.0124479	0	48.7	504123	1.29	0.06
05-05-2021 18:45:00	25.0492	0	4.96	30	0	0.0124479	0	48.7	504123	1.29	0.06
05-05-2021 18:46:00	25.0658	0	4.95	30	0	0.0124479	0	48.7	504123	1.29	0.06
05-05-2021 18:47:00	25.0825	0	4.97	30	0	0.0124479	0	49	504123	1.29	0.06
05-05-2021 18:48:00	25.0992	0	4.96	30	0	0.0124479	0	49	504123	1.29	0.06
05-05-2021 18:49:00	25.1158	0	4.95	30	0	0.0124479	0	49	504123	1.29	0.06
05-05-2021 18:50:00	25.1325	0	4.97	30	0	0.0124479	0	49.3	504123	1.29	0.06
05-05-2021 18:51:00	25.1492	0	4.96	30	0	0.0124479	0	49.3	504123	1.29	0.06
05-05-2021 18:52:00	25.1658	0	4.95	30	0	0.0124479	0	49.3	504123	1.35	0.06
05-05-2021 18:53:00	25.1825	0	4.95	30	0	0.0124479	0	50	504123	1.35	0.06
05-05-2021 18:54:00	25.1992	0	4.98	30	0	0.0124479	0	50.3	504123	1.35	0.06
05-05-2021 18:55:00	25.2158	0	4.97	30	0	0.0124479	0	50.3	504123	1.35	0.06
05-05-2021 18:56:00	25.2325	0	4.97	30	0	0.0124479	0	50.3	504123	1.35	0.06
05-05-2021 18:57:00	25.2492	0	4.96	30	0	0.0124479	0	50.3	504123	1.35	0.06
05-05-2021 18:58:00	25.2658	0	4.95	30	0	0.0124479	0	50.3	504123	1.35	0.06
05-05-2021 18:59:00	25.2825	0	5	30	0	0.0124479	0	51	504123	1.35	0.06
05-05-2021 19:00:00	25.2992	0	4.99	30	0	0.0124479	0	51	504123	1.35	0.06
05-05-2021 19:01:00	25.3158	0	4.98	30	0	0.0124479	0	51	504123	1.35	0.06
05-05-2021 19:02:00	25.3325	0	4.98	30	0	0.0124479	0	51	504123	1.35	0.06
05-05-2021 19:03:00	25.3492	0	4.97	30	0	0.0124479	0	51	504123	1.35	0.06
05-05-2021 19:04:00	25.3658	0	4.96	30	0	0.0124479	0	51	504123	1.35	0.06
05-05-2021 19:05:00	25.3825	0	4.95	30	0	0.0124479	0	51	504123	1.35	0.06
05-05-2021 19:06:00	25.3992	0	4.97	30	0	0.0124479	0	51.3	504123	1.35	0.06
05-05-2021 19:07:00	25.4158	0	4.96	30	0	0.0124479	0	51.3	504123	1.35	0.06
05-05-2021 19:08:00	25.4325	0	4.95	30	0	0.0124479	0	51.3	504123	1.35	0.06
05-05-2021 19:09:00	25.4492	0	4.97	30	0	0.0124479	0	52.2	504123	1.38	0.06
05-05-2021 19:10:00	25.4658	0	4.98	30	0	0.0124479	0	52.3	504123	1.39	0.05
05-05-2021 19:11:00	25.4825	0	4.97	30	0	0.0124479	0	52.3	504123	1.39	0.05
05-05-2021 19:12:00	25.4992	0	4.97	30	0	0.0124479	0	52.3	504123	1.39	0.05
05-05-2021 19:13:00	25.5158	0	4.96	30	0	0.0124479	0	52.3	504123	1.39	0.05
05-05-2021 19:14:00	25.5325	0	4.95	30	0	0.0124479	0	52.3	504123	1.39	0.05
05-05-2021 19:15:00	25.5492	0	5	30	0	0.0124479	0	53	504123	1.39	0.05
05-05-2021 19:16:00	25.5658	0	4.99	30	0	0.0124479	0	53	504123	1.39	0.05
05-05-2021 19:17:00	25.5825	0	4.98	30	0	0.0124479	0	53	504123	1.39	0.05
05-05-2021 19:18:00	25.5992	0	4.97	30	0	0.0124479	0	53	504123	1.39	0.05
05-05-2021 19:19:00	25.6158	0	4.97	30	0	0.0124479	0	53	504123	1.39	0.05
05-05-2021 19:20:00	25.6325	0	4.96	30	0	0.0124479	0	53	504123	1.39	0.05
05-05-2021 19:21:00	25.6492	0	4.95	30	0	0.0124479	0	53	504123	1.39	0.05
05-05-2021 19:22:00	25.6658	0	4.97	30	0	0.0124479	0	53.7	504123	1.39	0.05
05-05-2021 19:23:00	25.6825	0	4.96	30	0	0.0124479	0	53.7	504123	1.39	0.05
05-05-2021 19:24:00	25.6992	0	4.95	30	0	0.0124479	0	53.7	504123	1.39	0.05
05-05-2021 19:25:00	25.7158	0	5	30	0	0.0124479	0	54.4	504123	1.39	0.05
05-05-2021 19:26:00	25.7325	0	4.99	30	0	0.0124479	0	54.4	504123	1.39	0.05
05-05-2021 19:27:00	25.7492	0	4.98	30	0	0.0124479	0	54.4	504123	1.42	0.06
05-05-2021 19:28:00	25.7658	0	4.97	30	0	0.0124479	0	54.4	504123	1.42	0.06
05-05-2021 19:29:00	25.7825	0	4.97	30	0	0.0124479	0	54.4	504123	1.42	0.06
05-05-2021 19:30:00	25.7992	0	4.96	30	0	0.0124479	0	54.4	504123	1.42	0.06
05-05-2021 19:31:00	25.8158	0	4.95	30	0	0.0124479	0	54.4	504123	1.42	0.06
05-05-2021 19:32:00	25.8325	0	4.98	30	0	0.0124479	0	55.1	504123	1.42	0.06
05-05-2021 19:33:00	25.8492	0	4.97	30	0	0.0124479	0	55.1	504123	1.42	0.06
05-05-2021 19:34:00	25.8658	0	4.96	30	0	0.0124479	0	55.1	504123	1.42	0.06
05-05-2021 19:35:00	25.8825	0	4.95	30	0	0.0124479	0	55.1	504123	1.42	0.06
05-05-2021 19:36:00	25.8992	0	4.97	30	0	0.0124479	0	55.4	504123	1.42	0.06
05-05-2021 19:37:00	25.9158	0	4.96	30	0	0.0124479	0	55.4	504123	1.42	0.06
05-05-2021 19:38:00	25.9325	0	4.96	30	0	0.0124479	0	55.4	504123	1.42	0.06
05-05-2021 19:39:00	25.9492	0	4.95	30	0	0.0124479	0	55.4	504123	1.42	0.06
05-05-2021 19:40:00	25.9658	0	4.96	30	0	0.0124479	0	56.1	504123	1.42	0.06
05-05-2021 19:41:00	25.9825	0	4.96	30	0	0.0124479	0	56.1	504123	1.42	0.06
05-05-2021 19:42:00	25.9992	0	4.95	30	0	0.0124479	0	56.4	504123	1.42	0.06
05-05-2021 19:43:00	26.0158	0	4.98	30	0	0.0124479	0	56.4	504123	1.42	0.06
05-05-2021 19:44:00	26.0325	0	4.97	30	0	0.0124479	0	56.4	504123	1.46	0.06
05-05-2021 19:45:00	26.0492	0	4.96	30	0	0.0124479	0	56.4	504123	1.46	0.06
05-05-2021 19:46:00	26.0658	0	4.95	30	0	0.0124479	0	56.4	504123	1.46	0.06
05-05-2021 19:47:00	26.0825	0	4.98	30	0	0.0124479	0	57.1	504123	1.46	0.06
05-05-2021 19:48:00	26.0992	0	4.98	30	0	0.0124479	0	57.1	504123	1.46	0.06
05-05-2021 19:49:00	26.1158	0	4.97	30	0	0.0124479	0	57.1	504123	1.46	0.06
05-05-2021 19:50:00	26.1325	0	4.96	30	0	0.0124479	0	57.1	504123	1.46	0.06
05-05-2021 19:51:00	26.1492	0	4.95	30	0	0.0124479	0	57.1	504123	1.46	0.06
05-05-2021 19:52:00	26.1658	0	4.97	30	0	0.0124479	0	57.4	504123	1.46	0.06
05-05-2021 19:53:00	26.1825	0	4.96	30	0	0.0124479	0	57.4	504123	1.46	0.06
05-05-2021 19:54:00	26.1992	0	4.96	30	0	0.0124479	0	57.4	504123	1.46	0.06
05-05-2021 19:55:00	26.2158	0	4.95	30	0	0.0124479	0	57.7	504123	1.46	0.06
05-05-2021 19:56:00	26.2325	0	4.98	30	0	0.0124479	0	58.4	504123	1.46	0.06
05-05-2021 19:57:00	26.2492	0	4.97	30	0	0.0124479	0	58.4	504123	1.46	0.06
05-05-2021 19:58:00	26.2658	0	4.96	30	0	0.0124479	0	58.4	504123	1.46	0.06
05-05-2021 19:59:00	26.2825	0	4.95	30	0	0.0124479	0	58.4	504123	1.46	0.06
05-05-2021 20:00:00	26.2992	0	4.97	30	0	0.0124479	0	58.7	504123	1.46	0.06
05-05-2021 20:01:00	26.3158	0	4.97	30	0	0.0124479	0	58.7	504123	1.46	0.06
05-05-2021 20:02:00	26.3325	0	4.96	30	0	0.0124479	0	58.7	504123	1.48	0.06
05-05-2021 20:03:00	26.3492	0	4.95	30	0	0.0124479	0	58.7	504123	1.48	0.06
05-05-2021 20:04:00	26.3658	0	4.98	30	0	0.0124479	0	59	504123	1.48	0.06
05-05-2021 20:05:00	26.3825	0	4.98	30	0	0.0124479	0	59	504123	1.48	0.06
05-05-2021 20:06:00	26.3992	0	4.97	30	0	0.0124479	0	59	504123	1.48	0.06
05-05-2021 20:07:00	26.4158	0	4.96	30	0	0.0124479	0	59	504123	1.48	0.06
05-05-2021 20:08:00	26.4325	0	4.95	30	0	0.0124479	0	59	504123	1.48	0.06
05-05-2021 20:09:00	26.4492	0	4.98	30	0	0.0124479	0	59.7	504123	1.48	0.06
05-05-2021 20:10:00	26.4658	0	4.97	30	0	0.0124479	0	59.7	504123	1.48	0.06
05-05-2021 20:11:00	26.4825	0	4.96	30	0	0.0124479	0	59.7	504123	1.48	0.06
05-05-2021 20:12:00	26.4992	0	4.96	30	0	0.0124479	0	59.7	504123	1.48	0.06
05-05-2021 20:13:00	26.5158	0	4.95	30	0	0.0124479	0	60	504123	1.48	0.06
05-05-2021 20:14:00	26.5325	0	4.97	30	0	0.0124479	0	60.4	504123	1.48	0.06
05-05-2021 20:15:00	26.5492	0	4.96	30	0	0.0124479	0	60.4	504123	1.48	0.06
05-05-2021 20:16:00	26.5658	0	4.95	30	0	0.0124479	0	60.4	504123	1.48	0.06
05-05-2021 20:17:00	26.5825	0	4.97	30	0	0.0124479	0	60.7	504123	1.48	0.06
05-05-2021 20:18:00	26.5992	0	4.96	30	0	0.0124479	0	60.7	504123	1.48	0.06
05-05-2021 20:19:00	26.6158	0	4.95	30	0	0.0124479	0	60.7	504123	1.48	0.06
05-05-2021 20:20:00	26.6325	0	4.97	30	0	0.0124479	0	61	504123	1.48	0.06
05-05-2021 20:21:00	26.6492	0	4.96	30	0	0.0124479	0	61	504123	1.48	0.06
05-05-2021 20:22:00	26.6658	0	4.95	30	0	0.0124479	0	61	504123	1.48	0.06
05-05-2021 20:23:00	26.6825	0	4.97	30	0	0.0124479	0	61.3	504123	1.48	0.06
05-05-2021 20:24:00	26.6992	0	4.96	30	0	0.0124479	0	61.3	504123	1.48	0.06
05-05-2021 20:25:00	26.7158	0	4.95	30	0	0.0124479	0	61.3	504123	1.48	0.06
05-05-2021 20:26:00	26.7325	0	4.97	30	0	0.0124479	0	61.6	504123	1.48	0.06
05-05-2021 20:27:00	26.7492	0	4.96	30	0	0.0124479	0	61.6	504123	1.48	0.06
05-05-2021 20:28:00	26.7658	0	4.95	30	0	0.0124479	0	61.6	504123	1.48	0.06
05-05-2021 20:29:00	26.7825	0	4.98	30	0	0.0124479	0	62.6	504123	1.48	0.06
05-05-2021 20:30:00	26.7992	0	4.98	30	0	0.0124479	0	62.6	504123	1.48	0.06
05-05-2021 20:31:00	26.8158	0	4.97	30	0	0.0124479	0	62.6	504123	1.48	0.06
05-05-2021 20:32:00	26.8325	0	4.96	30	0	0.0124479	0	62.6	504123	1.48	0.06
05-05-2021 20:33:00	26.8492	0	4.95	30	0	0.0124479	0	62.6	504123	1.48	0.06
05-05-2021 20:34:00	26.8658	0	4.97	30	0	0.0124479	0	62.9	504123	1.48	0.06
05-05-2021 20:35:00	26.8825	0	4.96	30	0	0.0124479	0	62.9	504123	1.48	0.06
05-05-2021 20:36:00	26.8992	0	4.96	30	0	0.0124479	0	62.9	504123	1.48	0.06
05-05-2021 20:37:00	26.9158	0	4.95	30	0	0.0124479	0	62.9	504123	1.48	0.06
05-05-2021 20:38:00	26.9325	0	4.97	30	0	0.0124479	0	63.2	504123	1.48	0.06
05-05-2021 20:39:00	26.9492	0	4.96	30	0	0.0124479	0	63.2	504123	1.48	0.06
05-05-2021 20:40:00	26.9658	0	4.95	30	0	0.0124479	0	63.2	504123	1.48	0.06
05-05-2021 20:41:00	26.9825	0	4.97	30	0	0.0124479	0	63.5	504123	1.48	0.06
05-05-2021 20:42:00	26.9992	0	4.96	30	0	0.0124479	0	63.5	504123	1.48	0.06
05-05-2021 20:43:00	27.0158	0	4.96	30	0	0.0124479	0	63.5	504123	1.48	0.06
05-05-2021 20:44:00	27.0325	0	4.95	30	0	0.0124479	0	63.5	504123	1.48	0.06
05-05-2021 20:45:00	27.0492	0	4.98	30	0	0.0124479	0	64.5	504123	1.48	0.06
05-05-2021 20:46:00	27.0658	0	4.99	30	0	0.0124479	0	64.5	504123	1.48	0.06
05-05-2021 20:47:00	27.0825	0	4.98	30	0	0.0124479	0	64.5	504123	1.48	0.06
05-05-2021 20:48:00	27.0992	0	4.98	30	0	0.0124479	0	64.5	504123	1.48	0.06
05-05-2021 20:49:00	27.1158	0	4.97	30	0	0.0124479	0	64.5	504123	1.48	0.06
05-05-2021 20:50:00	27.1325	0	4.96	30	0	0.0124479	0	64.5	504123	1.48	0.06
05-05-2021 20:51:00	27.1492	0	4.96	30	0	0.0124479	0	64.5	504123	1.48	0.06
05-05-2021 20:52:00	27.1658	0	4.95	30	0	0.0124479	0	64.8	504123	1.48	0.06
05-05-2021 20:53:00	27.1825	0	5	30	0	0.0124479	0	65.2	504123	1.48	0.06
05-05-2021 20:54:00	27.1992	0	4.99	30	0	0.0124479	0	65.2	504123	1.46	0.06
05-05-2021 20:55:00	27.2158	0	4.98	30	0	0.0124479	0	65.2	504123	1.46	0.06
05-05-2021 20:56:00	27.2325	0	4.98	30	0	0.0124479	0	65.2	504123	1.46	0.06
05-05-2021 20:57:00	27.2492	0	4.97	30	0	0.0124479	0	65.2	504123	1.46	0.06
05-05-2021 20:58:00	27.2658	0	4.96	30	0	0.0124479	0	65.2	504123	1.46	0.06
05-05-2021 20:59:00	27.2825	0	4.95	30	0	0.0124479	0	65.2	504123	1.46	0.06
05-05-2021 21:00:00	27.2992	0	4.97	30	0	0.0124479	0	65.9	504123	1.46	0.06
05-05-2021 21:01:00	27.3158	0	4.97	30	0	0.0124479	0	65.9	504123	1.46	0.06
05-05-2021 21:02:00	27.3325	0	4.96	30	0	0.0124479	0	65.9	504123	1.46	0.06
05-05-2021 21:03:00	27.3492	0	4.95	30	0	0.0124479	0	65.9	504123	1.46	0.06
05-05-2021 21:04:00	27.3658	0	4.98	30	0	0.0124479	0	66.6	504123	1.46	0.06
05-05-2021 21:05:00	27.3825	0	4.97	30	0	0.0124479	0	66.6	504123	1.46	0.06
05-05-2021 21:06:00	27.3992	0	4.96	30	0	0.0124479	0	66.6	504123	1.46	0.06
05-05-2021 21:07:00	27.4158	0	4.96	30	0	0.0124479	0	66.6	504123	1.46	0.06
05-05-2021 21:08:00	27.4325	0	4.95	30	0	0.0124479	0	66.6	504123	1.46	0.06
05-05-2021 21:09:00	27.4492	0	4.97	30	0	0.0124479	0	66.9	504123	1.46	0.06
05-05-2021 21:10:00	27.4658	0	4.96	30	0	0.0124479	0	66.9	504123	1.46	0.06
05-05-2021 21:11:00	27.4825	0	4.95	30	0	0.0124479	0	66.9	504123	1.46	0.06
05-05-2021 21:12:00	27.4992	0	4.97	30	0	0.0124479	0	67.2	504123	1.42	0.05
05-05-2021 21:13:00	27.5158	0	4.96	30	0	0.0124479	0	67.2	504123	1.42	0.05
05-05-2021 21:14:00	27.5325	0	4.96	30	0	0.0124479	0	67.2	504123	1.42	0.05
05-05-2021 21:15:00	27.5492	0	4.95	30	0	0.0124479	0	67.2	504123	1.42	0.05
05-05-2021 21:16:00	27.5658	0	4.97	30	0	0.0124479	0	67.5	504123	1.42	0.05
05-05-2021 21:17:00	27.5825	0	4.96	30	0	0.0124479	0	67.5	504123	1.42	0.05
05-05-2021 21:18:00	27.5992	0	4.96	30	0	0.0124479	0	67.5	504123	1.42	0.05
05-05-2021 21:19:00	27.6158	0	4.95	30	0	0.0124479	0	67.5	504123	1.42	0.05
05-05-2021 21:20:00	27.6325	0	4.97	30	0	0.0124479	0	68.2	504123	1.42	0.05
05-05-2021 21:21:00	27.6492	0	4.96	30	0	0.0124479	0	68.2	504123	1.42	0.05
05-05-2021 21:22:00	27.6658	0	4.95	30	0	0.0124479	0	68.2	504123	1.42	0.05
05-05-2021 21:23:00	27.6825	0	4.97	30	0	0.0124479	0	68.5	504123	1.42	0.05
05-05-2021 21:24:00	27.6992	0	4.96	30	0	0.0124479	0	68.5	504123	1.42	0.05
05-05-2021 21:25:00	27.7158	0	4.96	30	0	0.0124479	0	68.5	504123	1.42	0.05
05-05-2021 21:26:00	27.7325	0	4.95	30	0	0.0124479	0	68.5	504123	1.42	0.05
05-05-2021 21:27:00	27.7492	0	4.97	30	0	0.0124479	0	68.8	504123	1.42	0.05
05-05-2021 21:28:00	27.7658	0	4.96	30	0	0.0124479	0	68.8	504123	1.42	0.05
05-05-2021 21:29:00	27.7825	0	4.95	30	0	0.0124479	0	68.8	504123	1.42	0.06
05-05-2021 21:30:00	27.7992	0	4.97	30	0	0.0124479	0	69.1	504123	1.35	0.05
05-05-2021 21:31:00	27.8158	0	4.96	30	0	0.0124479	0	69.1	504123	1.35	0.05
05-05-2021 21:32:00	27.8325	0	4.96	30	0	0.0124479	0	69.1	504123	1.35	0.05
05-05-2021 21:33:00	27.8492	0	4.95	30	0	0.0124479	0	69.1	504123	1.35	0.05
05-05-2021 21:34:00	27.8658	0	4.97	30	0	0.0124479	0	69.4	504123	1.35	0.05
05-05-2021 21:35:00	27.8825	0	4.98	30	0	0.0124479	0	69.4	504123	1.35	0.05
05-05-2021 21:36:00	27.8992	0	4.98	30	0	0.0124479	0	69.4	504123	1.35	0.05
05-05-2021 21:37:00	27.9158	0	4.97	30	0	0.0124479	0	69.4	504123	1.35	0.05
05-05-2021 21:38:00	27.9325	0	4.96	30	0	0.0124479	0	69.4	504123	1.35	0.05
05-05-2021 21:39:00	27.9492	0	4.96	30	0	0.0124479	0	69.4	504123	1.35	0.05
05-05-2021 21:40:00	27.9658	0	4.95	30	0	0.0124479	0	69.4	504123	1.35	0.05
05-05-2021 21:41:00	27.9825	0	4.95	30	0	0.0124479	0	70.1	504123	1.35	0.05
05-05-2021 21:42:00	27.9992	0	4.98	30	0	0.0124479	0	70.4	504123	1.35	0.05
05-05-2021 21:43:00	28.0158	0	4.98	30	0	0.0124479	0	70.4	504123	1.35	0.05
05-05-2021 21:44:00	28.0325	0	4.97	30	0	0.0124479	0	70.4	504123	1.35	0.05
05-05-2021 21:45:00	28.0492	0	4.97	30	0	0.0124479	0	70.4	504123	1.35	0.05
05-05-2021 21:46:00	28.0658	0	4.96	30	0	0.0124479	0	70.4	504123	1.35	0.05
05-05-2021 21:47:00	28.0825	0	4.96	30	0	0.0124479	0	70.4	504123	1.25	0.06
05-05-2021 21:48:00	28.0992	0	4.95	30	0	0.0124479	0	70.4	504123	1.25	0.06
05-05-2021 21:49:00	28.1158	0	4.97	30	0	0.0124479	0	70.7	504123	1.25	0.06
05-05-2021 21:50:00	28.1325	0	4.96	30	0	0.0124479	0	70.7	504123	1.25	0.06
05-05-2021 21:51:00	28.1492	0	4.96	30	0	0.0124479	0	70.7	504123	1.25	0.06
05-05-2021 21:52:00	28.1658	0	4.95	30	0	0.0124479	0	70.7	504123	1.25	0.06
05-05-2021 21:53:00	28.1825	0	4.97	30	0	0.0124479	0	71	504123	1.25	0.06
05-05-2021 21:54:00	28.1992	0	4.96	30	0	0.0124479	0	71	504123	1.25	0.06
05-05-2021 21:55:00	28.2158	0	4.96	30	0	0.0124479	0	71	504123	1.25	0.06
05-05-2021 21:56:00	28.2325	0	4.95	30	0	0.0124479	0	71	504123	1.25	0.06
05-05-2021 21:57:00	28.2492	0	4.96	30	0	0.0124479	0	71.3	504123	1.25	0.06
05-05-2021 21:58:00	28.2658	0	4.97	30	0	0.0124479	0	71.3	504123	1.25	0.06
05-05-2021 21:59:00	28.2825	0	4.96	30	0	0.0124479	0	71.3	504123	1.25	0.06
05-05-2021 22:00:00	28.2992	0	4.96	30	0	0.0124479	0	71.3	504123	1.25	0.06
05-05-2021 22:01:00	28.3158	0	4.95	30	0	0.0124479	0	71.3	504123	1.25	0.06
05-05-2021 22:02:00	28.3325	0	4.97	30	0	0.0124479	0	71.6	504123	1.25	0.06
05-05-2021 22:03:00	28.3492	0	4.96	30	0	0.0124479	0	71.6	504123	1.25	0.06
05-05-2021 22:04:00	28.3658	0	4.96	30	0	0.0124479	0	71.6	504123	1.25	0.06
05-05-2021 22:05:00	28.3825	0	4.95	30	0	0.0124479	0	71.6	504123	1.14	0.06
05-05-2021 22:06:00	28.3992	0	4.95	30	0	0.0124479	0	71.6	504123	1.14	0.06
05-05-2021 22:07:00	28.4158	0	4.99	30	0	0.0124479	0	72.6	504123	1.14	0.06
05-05-2021 22:08:00	28.4325	0	4.99	30	0	0.0124479	0	72.6	504123	1.14	0.06
05-05-2021 22:09:00	28.4492	0	4.98	30	0	0.0124479	0	72.6	504123	1.14	0.06
05-05-2021 22:10:00	28.4658	0	4.98	30	0	0.0124479	0	72.6	504123	1.14	0.06
05-05-2021 22:11:00	28.4825	0	4.97	30	0	0.0124479	0	72.6	504123	1.14	0.06
05-05-2021 22:12:00	28.4992	0	4.97	30	0	0.0124479	0	72.6	504123	1.14	0.06
05-05-2021 22:13:00	28.5158	0	4.96	30	0	0.0124479	0	72.6	504123	1.14	0.06
05-05-2021 22:14:00	28.5325	0	4.96	30	0	0.0124479	0	72.6	504123	1.14	0.06
05-05-2021 22:15:00	28.5492	0	4.96	30	0	0.0124479	0	72.6	504123	1.14	0.06
05-05-2021 22:16:00	28.5658	0	4.95	30	0	0.0124479	0	72.6	504123	1.14	0.06
05-05-2021 22:17:00	28.5825	0	4.97	30	0	0.0124479	0	72.9	504123	1.14	0.06
05-05-2021 22:18:00	28.5992	0	4.96	30	0	0.0124479	0	72.9	504123	1.14	0.06
05-05-2021 22:19:00	28.6158	0	4.96	30	0	0.0124479	0	72.9	504123	1.14	0.06
05-05-2021 22:20:00	28.6325	0	4.96	30	0	0.0124479	0	72.9	504123	1.14	0.06
05-05-2021 22:21:00	28.6492	0	4.95	30	0	0.0124479	0	72.9	504123	1.14	0.06
05-05-2021 22:22:00	28.6658	0	4.97	30	0	0.0124479	0	73.6	504123	0.99	0.06
05-05-2021 22:23:00	28.6825	0	4.99	30	0	0.0124479	0	73.6	504123	0.99	0.06
05-05-2021 22:24:00	28.6992	0	4.99	30	0	0.0124479	0	73.6	504123	0.99	0.06
05-05-2021 22:25:00	28.7158	0	4.99	30	0	0.0124479	0	73.6	504123	0.99	0.06
05-05-2021 22:26:00	28.7325	0	4.98	30	0	0.0124479	0	73.6	504123	0.99	0.06
05-05-2021 22:27:00	28.7492	0	4.98	30	0	0.0124479	0	73.6	504123	0.99	0.06
05-05-2021 22:28:00	28.7658	0	4.97	30	0	0.0124479	0	73.6	504123	0.99	0.06
05-05-2021 22:29:00	28.7825	0	4.97	30	0	0.0124479	0	73.6	504123	0.99	0.06
05-05-2021 22:30:00	28.7992	0	4.97	30	0	0.0124479	0	73.6	504123	0.99	0.06
05-05-2021 22:31:00	28.8158	0	4.96	30	0	0.0124479	0	73.6	504123	0.99	0.06
05-05-2021 22:32:00	28.8325	0	4.96	30	0	0.0124479	0	73.6	504123	0.99	0.06
05-05-2021 22:33:00	28.8492	0	4.96	30	0	0.0124479	0	73.6	504123	0.99	0.06
05-05-2021 22:34:00	28.8658	0	4.95	30	0	0.0124479	0	73.6	504123	0.99	0.06
05-05-2021 22:35:00	28.8825	0	4.95	30	0	0.0124479	0	73.9	504123	0.99	0.06
05-05-2021 22:36:00	28.8992	0	4.99	30	0	0.0124479	0	74.6	504123	0.99	0.06
05-05-2021 22:37:00	28.9158	0	4.99	30	0	0.0124479	0	74.6	504123	0.99	0.06
05-05-2021 22:38:00	28.9325	0	4.98	30	0	0.0124479	0	74.6	504123	0.99	0.06
05-05-2021 22:39:00	28.9492	0	4.98	30	0	0.0124479	0	74.6	504123	0.99	0.06
05-05-2021 22:40:00	28.9658	0	4.98	30	0	0.0124479	0	74.6	504123	0.85	0.06
05-05-2021 22:41:00	28.9825	0	4.97	30	0	0.0124479	0	74.6	504123	0.85	0.06
05-05-2021 22:42:00	28.9992	0	4.97	30	0	0.0124479	0	74.6	504123	0.85	0.06
05-05-2021 22:43:00	29.0158	0	4.97	30	0	0.0124479	0	74.6	504123	0.85	0.06
05-05-2021 22:44:00	29.0325	0	4.96	30	0	0.0124479	0	74.6	504123	0.85	0.06
05-05-2021 22:45:00	29.0492	0	4.96	30	0	0.0124479	0	74.6	504123	0.85	0.06
05-05-2021 22:46:00	29.0658	0	4.96	30	0	0.0124479	0	74.6	504123	0.85	0.06
05-05-2021 22:47:00	29.0825	0	4.96	30	0	0.0124479	0	74.6	504123	0.85	0.06
05-05-2021 22:48:00	29.0992	0	4.95	30	0	0.0124479	0	74.6	504123	0.85	0.06
05-05-2021 22:49:00	29.1158	0	4.97	30	0	0.0124479	0	74.9	504123	0.85	0.06
05-05-2021 22:50:00	29.1325	0	4.97	30	0	0.0124479	0	74.9	504123	0.85	0.06
05-05-2021 22:51:00	29.1492	0	4.97	30	0	0.0124479	0	74.9	504123	0.85	0.06
05-05-2021 22:52:00	29.1658	0	4.96	30	0	0.0124479	0	74.9	504123	0.85	0.06
05-05-2021 22:53:00	29.1825	0	4.96	30	0	0.0124479	0	74.9	504123	0.85	0.06
05-05-2021 22:54:00	29.1992	0	4.96	30	0	0.0124479	0	74.9	504123	0.85	0.06
05-05-2021 22:55:00	29.2158	0	4.95	30	0	0.0124479	0	74.9	504123	0.85	0.06
05-05-2021 22:56:00	29.2325	0	4.95	30	0	0.0124479	0	74.9	504123	0.85	0.06
05-05-2021 22:57:00	29.2492	0	4.97	30	0	0.0124479	0	75.2	504123	0.74	0.06
05-05-2021 22:58:00	29.2658	0	4.97	30	0	0.0124479	0	75.2	504123	0.74	0.06
05-05-2021 22:59:00	29.2825	0	4.97	30	0	0.0124479	0	75.2	504123	0.74	0.06
05-05-2021 23:00:00	29.2992	0	4.96	30	0	0.0124479	0	75.2	504123	0.74	0.06
05-05-2021 23:01:00	29.3158	0	4.96	30	0	0.0124479	0	75.2	504123	0.74	0.06
05-05-2021 23:02:00	29.3325	0	4.96	30	0	0.0124479	0	75.2	504123	0.74	0.06
05-05-2021 23:03:00	29.3492	0	4.95	30	0	0.0124479	0	75.2	504123	0.74	0.06
05-05-2021 23:04:00	29.3658	0	4.95	30	0	0.0124479	0	75.2	504123	0.74	0.06
05-05-2021 23:05:00	29.3825	0	4.97	30	0	0.0124479	0	75.5	504123	0.74	0.06
05-05-2021 23:06:00	29.3992	0	4.97	30	0	0.0124479	0	75.5	504123	0.74	0.06
05-05-2021 23:07:00	29.4158	0	4.97	30	0	0.0124479	0	75.5	504123	0.74	0.06
05-05-2021 23:08:00	29.4325	0	4.97	30	0	0.0124479	0	75.5	504123	0.74	0.06
05-05-2021 23:09:00	29.4492	0	4.96	30	0	0.0124479	0	75.5	504123	0.74	0.06
05-05-2021 23:10:00	29.4658	0	4.96	30	0	0.0124479	0	75.5	504123	0.74	0.06
05-05-2021 23:11:00	29.4825	0	4.96	30	0	0.0124479	0	75.5	504123	0.74	0.06
05-05-2021 23:12:00	29.4992	0	4.95	30	0	0.0124479	0	75.5	504123	0.74	0.06
05-05-2021 23:13:00	29.5158	0	4.95	30	0	0.0124479	0	75.5	504123	0.74	0.06
05-05-2021 23:14:00	29.5325	0	4.95	30	0	0.0124479	0	75.5	504123	0.74	0.06
05-05-2021 23:15:00	29.5492	0	4.99	30	0	0.0124479	0	76.5	504123	0.63	0.06
05-05-2021 23:16:00	29.5658	0	4.99	30	0	0.0124479	0	76.5	504123	0.63	0.06
05-05-2021 23:17:00	29.5825	0	4.98	30	0	0.0124479	0	76.5	504123	0.63	0.06
05-05-2021 23:18:00	29.5992	0	4.98	30	0	0.0124479	0	76.5	504123	0.63	0.06
05-05-2021 23:19:00	29.6158	0	4.98	30	0	0.0124479	0	76.5	504123	0.63	0.06
05-05-2021 23:20:00	29.6325	0	4.98	30	0	0.0124479	0	76.5	504123	0.63	0.06
05-05-2021 23:21:00	29.6492	0	4.97	30	0	0.0124479	0	76.5	504123	0.63	0.06
05-05-2021 23:22:00	29.6658	0	4.97	30	0	0.0124479	0	76.5	504123	0.63	0.06
05-05-2021 23:23:00	29.6825	0	4.97	30	0	0.0124479	0	76.5	504123	0.63	0.06
05-05-2021 23:24:00	29.6992	0	4.97	30	0	0.0124479	0	76.5	504123	0.63	0.06
05-05-2021 23:25:00	29.7158	0	4.97	30	0	0.0124479	0	76.5	504123	0.63	0.06
05-05-2021 23:26:00	29.7325	0	4.96	30	0	0.0124479	0	76.5	504123	0.63	0.06
05-05-2021 23:27:00	29.7492	0	4.96	30	0	0.0124479	0	76.5	504123	0.63	0.06
05-05-2021 23:28:00	29.7658	0	4.96	30	0	0.0124479	0	76.5	504123	0.63	0.06
05-05-2021 23:29:00	29.7825	0	4.96	30	0	0.0124479	0	76.5	504123	0.63	0.06
05-05-2021 23:30:00	29.7992	0	4.96	30	0	0.0124479	0	76.5	504123	0.63	0.06
05-05-2021 23:31:00	29.8158	0	4.95	30	0	0.0124479	0	76.5	504123	0.63	0.06
05-05-2021 23:32:00	29.8325	0	4.95	30	0	0.0124479	0	76.5	504123	0.54	0.07
05-05-2021 23:33:00	29.8492	0	4.95	30	0	0.0124479	0	76.5	504123	0.54	0.06
05-05-2021 23:34:00	29.8658	0	4.98	30	0	0.0124479	0	77.2	504123	0.54	0.06
05-05-2021 23:35:00	29.8825	0	4.98	30	0	0.0124479	0	77.2	504123	0.54	0.06
05-05-2021 23:36:00	29.8992	0	4.98	30	0	0.0124479	0	77.2	504123	0.54	0.06
05-05-2021 23:37:00	29.9158	0	4.98	30	0	0.0124479	0	77.2	504123	0.54	0.06
05-05-2021 23:38:00	29.9325	0	4.97	30	0	0.0124479	0	77.2	504123	0.54	0.06
05-05-2021 23:39:00	29.9492	0	4.97	30	0	0.0124479	0	77.2	504123	0.54	0.06
05-05-2021 23:40:00	29.9658	0	4.97	30	0	0.0124479	0	77.2	504123	0.54	0.06
05-05-2021 23:41:00	29.9825	0	4.97	30	0	0.0124479	0	77.2	504123	0.54	0.06
05-05-2021 23:42:00	29.9992	0	4.97	30	0	0.0124479	0	77.2	504123	0.54	0.06
05-05-2021 23:43:00	30.0158	0	4.97	30	0	0.0124479	0	77.2	504123	0.54	0.06
05-05-2021 23:44:00	30.0325	0	4.96	30	0	0.0124479	0	77.2	504123	0.54	0.06
05-05-2021 23:45:00	30.0492	0	4.96	30	0	0.0124479	0	77.2	504123	0.54	0.06
05-05-2021 23:46:00	30.0658	0	4.96	30	0	0.0124479	0	77.2	504123	0.54	0.06
05-05-2021 23:47:00	30.0825	0	4.96	30	0	0.0124479	0	77.2	504123	0.54	0.06
05-05-2021 23:48:00	30.0992	0	4.96	30	0	0.0124479	0	77.2	504123	0.54	0.06
05-05-2021 23:49:00	30.1158	0	4.96	30	0	0.0124479	0	77.2	504123	0.54	0.06
05-05-2021 23:50:00	30.1325	0	4.95	30	0	0.0124479	0	77.2	504123	0.47	0.06
05-05-2021 23:51:00	30.1492	0	4.97	30	0	0.0124479	0	77.2	504123	0.47	0.06
05-05-2021 23:52:00	30.1658	0	4.97	30	0	0.0124479	0	77.2	504123	0.47	0.06
05-05-2021 23:53:00	30.1825	0	4.97	30	0	0.0124479	0	77.2	504123	0.47	0.06
05-05-2021 23:54:00	30.1992	0	4.97	30	0	0.0124479	0	77.2	504123	0.47	0.06
05-05-2021 23:55:00	30.2158	0	4.97	30	0	0.0124479	0	77.2	504123	0.47	0.06
05-05-2021 23:56:00	30.2325	0	4.96	30	0	0.0124479	0	77.2	504123	0.47	0.06
05-05-2021 23:57:00	30.2492	0	4.96	30	0	0.0124479	0	77.2	504123	0.47	0.06
05-05-2021 23:58:00	30.2658	0	4.96	30	0	0.0124479	0	77.2	504123	0.47	0.06
05-05-2021 23:59:00	30.2825	0	4.96	30	0	0.0124479	0	77.2	504123	0.47	0.06
06-05-2021 00:00:00	30.2992	0	4.96	30	0	0.0124479	0	77.2	504123	0.47	0.06
06-05-2021 00:01:00	30.3158	0	4.96	30	0	0.0124479	0	77.2	504123	0.47	0.06
06-05-2021 00:02:00	30.3325	0	4.96	30	0	0.0124479	0	77.2	504123	0.47	0.06
06-05-2021 00:03:00	30.3492	0	4.96	30	0	0.0124479	0	77.2	504123	0.47	0.06
06-05-2021 00:04:00	30.3658	0	4.95	30	0	0.0124479	0	77.2	504123	0.47	0.06
06-05-2021 00:05:00	30.3825	0	4.95	30	0	0.0124479	0	77.2	504123	0.47	0.06
06-05-2021 00:06:00	30.3992	0	4.95	30	0	0.0124479	0	77.2	504123	0.47	0.06
06-05-2021 00:07:00	30.4158	0	4.95	30	0	0.0124479	0	77.2	504123	0.42	0.07
06-05-2021 00:08:00	30.4325	0	4.97	30	0	0.0124479	0	77.9	504123	0.41	0.07
06-05-2021 00:09:00	30.4492	0	4.97	30	0	0.0124479	0	77.9	504123	0.41	0.07
06-05-2021 00:10:00	30.4658	0	4.97	30	0	0.0124479	0	77.9	504123	0.41	0.07
06-05-2021 00:11:00	30.4825	0	4.97	30	0	0.0124479	0	77.9	504123	0.41	0.07
06-05-2021 00:12:00	30.4992	0	4.97	30	0	0.0124479	0	77.9	504123	0.41	0.07
06-05-2021 00:13:00	30.5158	0	4.97	30	0	0.0124479	0	77.9	504123	0.41	0.07
06-05-2021 00:14:00	30.5325	0	4.97	30	0	0.0124479	0	77.9	504123	0.41	0.07
06-05-2021 00:15:00	30.5492	0	4.96	30	0	0.0124479	0	77.9	504123	0.41	0.07
06-05-2021 00:16:00	30.5658	0	4.96	30	0	0.0124479	0	77.9	504123	0.41	0.07
06-05-2021 00:17:00	30.5825	0	4.96	30	0	0.0124479	0	77.9	504123	0.41	0.07
06-05-2021 00:18:00	30.5992	0	4.96	30	0	0.0124479	0	77.9	504123	0.41	0.07
06-05-2021 00:19:00	30.6158	0	4.96	30	0	0.0124479	0	77.9	504123	0.41	0.07
06-05-2021 00:20:00	30.6325	0	4.96	30	0	0.0124479	0	77.9	504123	0.41	0.07
06-05-2021 00:21:00	30.6492	0	4.96	30	0	0.0124479	0	77.9	504123	0.41	0.07
06-05-2021 00:22:00	30.6658	0	4.96	30	0	0.0124479	0	77.9	504123	0.41	0.07
06-05-2021 00:23:00	30.6825	0	4.96	30	0	0.0124479	0	77.9	504123	0.41	0.07
06-05-2021 00:24:00	30.6992	0	4.95	30	0	0.0124479	0	77.9	504123	0.41	0.07
06-05-2021 00:25:00	30.7158	0	4.95	30	0	0.0124479	0	77.9	504123	0.35	0.07
06-05-2021 00:26:00	30.7325	0	4.95	30	0	0.0124479	0	77.9	504123	0.35	0.07
06-05-2021 00:27:00	30.7492	0	4.95	30	0	0.0124479	0	77.9	504123	0.35	0.07
06-05-2021 00:28:00	30.7658	0	4.95	30	0	0.0124479	0	77.9	504123	0.35	0.07
06-05-2021 00:29:00	30.7825	0	4.95	30	0	0.0124479	0	77.9	504123	0.35	0.07
06-05-2021 00:30:00	30.7992	0	4.98	30	0	0.0124479	0	78.6	504123	0.35	0.07
06-05-2021 00:31:00	30.8158	0	4.98	30	0	0.0124479	0	78.6	504123	0.35	0.07
06-05-2021 00:32:00	30.8325	0	4.98	30	0	0.0124479	0	78.6	504123	0.35	0.07
06-05-2021 00:33:00	30.8492	0	4.98	30	0	0.0124479	0	78.6	504123	0.35	0.07
06-05-2021 00:34:00	30.8658	0	4.98	30	0	0.0124479	0	78.6	504123	0.35	0.07
06-05-2021 00:35:00	30.8825	0	4.98	30	0	0.0124479	0	78.6	504123	0.35	0.07
06-05-2021 00:36:00	30.8992	0	4.98	30	0	0.0124479	0	78.6	504123	0.35	0.07
06-05-2021 00:37:00	30.9158	0	4.98	30	0	0.0124479	0	78.6	504123	0.35	0.07
06-05-2021 00:38:00	30.9325	0	4.98	30	0	0.0124479	0	78.6	504123	0.35	0.07
06-05-2021 00:39:00	30.9492	0	4.98	30	0	0.0124479	0	78.6	504123	0.35	0.07
06-05-2021 00:40:00	30.9658	0	4.98	30	0	0.0124479	0	78.6	504123	0.35	0.07
06-05-2021 00:41:00	30.9825	0	4.97	30	0	0.0124479	0	78.6	504123	0.35	0.07
06-05-2021 00:42:00	30.9992	0	4.97	30	0	0.0124479	0	78.6	504123	0.29	0.07
06-05-2021 00:43:00	31.0158	0	4.97	30	0	0.0124479	0	78.6	504123	0.29	0.07
06-05-2021 00:44:00	31.0325	0	4.97	30	0	0.0124479	0	78.6	504123	0.29	0.07
06-05-2021 00:45:00	31.0492	0	4.97	30	0	0.0124479	0	78.6	504123	0.29	0.07
06-05-2021 00:46:00	31.0658	0	4.97	30	0	0.0124479	0	78.6	504123	0.29	0.07
06-05-2021 00:47:00	31.0825	0	4.97	30	0	0.0124479	0	78.6	504123	0.29	0.07
06-05-2021 00:48:00	31.0992	0	4.97	30	0	0.0124479	0	78.6	504123	0.29	0.07
06-05-2021 00:49:00	31.1158	0	4.97	30	0	0.0124479	0	78.6	504123	0.29	0.07
06-05-2021 00:50:00	31.1325	0	4.97	30	0	0.0124479	0	78.6	504123	0.29	0.07
06-05-2021 00:51:00	31.1492	0	4.97	30	0	0.0124479	0	78.6	504123	0.29	0.07
06-05-2021 00:52:00	31.1658	0	4.97	30	0	0.0124479	0	78.6	504123	0.29	0.07
06-05-2021 00:53:00	31.1825	0	4.97	30	0	0.0124479	0	78.6	504123	0.29	0.07
06-05-2021 00:54:00	31.1992	0	4.97	30	0	0.0124479	0	78.6	504123	0.29	0.07
06-05-2021 00:55:00	31.2158	0	4.97	30	0	0.0124479	0	78.6	504123	0.29	0.07
06-05-2021 00:56:00	31.2325	0	4.97	30	0	0.0124479	0	78.6	504123	0.29	0.07
06-05-2021 00:57:00	31.2492	0	4.96	30	0	0.0124479	0	78.6	504123	0.29	0.07
06-05-2021 00:58:00	31.2658	0	4.96	30	0	0.0124479	0	78.6	504123	0.29	0.07
06-05-2021 00:59:00	31.2825	0	4.96	30	0	0.0124479	0	78.6	504123	0.29	0.07
06-05-2021 01:00:00	31.2992	0	4.96	30	0	0.0124479	0	78.6	504123	0.24	0.07
06-05-2021 01:01:00	31.3158	0	4.96	30	0	0.0124479	0	78.6	504123	0.24	0.07
06-05-2021 01:02:00	31.3325	0	4.96	30	0	0.0124479	0	78.6	504123	0.24	0.07
06-05-2021 01:03:00	31.3492	0	4.96	30	0	0.0124479	0	78.6	504123	0.24	0.07
06-05-2021 01:04:00	31.3658	0	4.96	30	0	0.0124479	0	78.6	504123	0.24	0.07
06-05-2021 01:05:00	31.3825	0	4.96	30	0	0.0124479	0	78.6	504123	0.24	0.07
06-05-2021 01:06:00	31.3992	0	4.96	30	0	0.0124479	0	78.6	504123	0.24	0.07
06-05-2021 01:07:00	31.4158	0	4.98	30	0	0.0124479	0	78.6	504123	0.24	0.07
06-05-2021 01:08:00	31.4325	0	4.98	30	0	0.0124479	0	78.6	504123	0.24	0.07
06-05-2021 01:09:00	31.4492	0	4.98	30	0	0.0124479	0	78.6	504123	0.24	0.07
06-05-2021 01:10:00	31.4658	0	4.98	30	0	0.0124479	0	78.6	504123	0.24	0.07
06-05-2021 01:11:00	31.4825	0	4.98	30	0	0.0124479	0	78.6	504123	0.24	0.07
06-05-2021 01:12:00	31.4992	0	4.98	30	0	0.0124479	0	78.6	504123	0.24	0.07
06-05-2021 01:13:00	31.5158	0	4.98	30	0	0.0124479	0	78.6	504123	0.24	0.07
06-05-2021 01:14:00	31.5325	0	4.98	30	0	0.0124479	0	78.6	504123	0.24	0.07
06-05-2021 01:15:00	31.5492	0	4.98	30	0	0.0124479	0	78.6	504123	0.24	0.07
06-05-2021 01:16:00	31.5658	0	4.98	30	0	0.0124479	0	78.6	504123	0.24	0.07
06-05-2021 01:17:00	31.5825	0	4.98	30	0	0.0124479	0	78.6	504123	0.2	0.07
06-05-2021 01:18:00	31.5992	0	4.98	30	0	0.0124479	0	78.6	504123	0.2	0.07
06-05-2021 01:19:00	31.6158	0	4.98	30	0	0.0124479	0	78.6	504123	0.2	0.07
06-05-2021 01:20:00	31.6325	0	4.98	30	0	0.0124479	0	78.6	504123	0.2	0.07
06-05-2021 01:21:00	31.6492	0	4.98	30	0	0.0124479	0	78.6	504123	0.2	0.07
06-05-2021 01:22:00	31.6658	0	4.97	30	0	0.0124479	0	78.6	504123	0.2	0.07
06-05-2021 01:23:00	31.6825	0	4.97	30	0	0.0124479	0	78.6	504123	0.2	0.07
06-05-2021 01:24:00	31.6992	0	4.97	30	0	0.0124479	0	78.6	504123	0.2	0.07
06-05-2021 01:25:00	31.7158	0	4.97	30	0	0.0124479	0	78.6	504123	0.2	0.07
06-05-2021 01:26:00	31.7325	0	4.97	30	0	0.0124479	0	78.6	504123	0.2	0.07
06-05-2021 01:27:00	31.7492	0	4.97	30	0	0.0124479	0	78.6	504123	0.2	0.07
06-05-2021 01:28:00	31.7658	0	4.97	30	0	0.0124479	0	78.6	504123	0.2	0.07
06-05-2021 01:29:00	31.7825	0	4.97	30	0	0.0124479	0	78.6	504123	0.2	0.07
06-05-2021 01:30:00	31.7992	0	4.97	30	0	0.0124479	0	78.6	504123	0.2	0.07
06-05-2021 01:31:00	31.8158	0	4.97	30	0	0.0124479	0	78.6	504123	0.2	0.07
06-05-2021 01:32:00	31.8325	0	4.97	30	0	0.0124479	0	78.6	504123	0.2	0.07
06-05-2021 01:33:00	31.8492	0	4.97	30	0	0.0124479	0	78.6	504123	0.2	0.07
06-05-2021 01:34:00	31.8658	0	4.97	30	0	0.0124479	0	78.6	504123	0.2	0.07
06-05-2021 01:35:00	31.8825	0	4.97	30	0	0.0124479	0	78.6	504123	0.16	0.07
06-05-2021 01:36:00	31.8992	0	4.97	30	0	0.0124479	0	78.6	504123	0.16	0.07
06-05-2021 01:37:00	31.9158	0	4.97	30	0	0.0124479	0	78.6	504123	0.16	0.07
06-05-2021 01:38:00	31.9325	0	4.97	30	0	0.0124479	0	78.6	504123	0.16	0.07
06-05-2021 01:39:00	31.9492	0	4.97	30	0	0.0124479	0	78.6	504123	0.16	0.07
06-05-2021 01:40:00	31.9658	0	4.97	30	0	0.0124479	0	78.6	504123	0.16	0.07
06-05-2021 01:41:00	31.9825	0	4.97	30	0	0.0124479	0	78.6	504123	0.16	0.07
06-05-2021 01:42:00	31.9992	0	4.97	30	0	0.0124479	0	78.6	504123	0.16	0.07
06-05-2021 01:43:00	32.0158	0	4.97	30	0	0.0124479	0	78.6	504123	0.16	0.07
06-05-2021 01:44:00	32.0325	0	4.97	30	0	0.0124479	0	78.6	504123	0.16	0.07
06-05-2021 01:45:00	32.0492	0	4.97	30	0	0.0124479	0	78.6	504123	0.16	0.07
06-05-2021 01:46:00	32.0658	0	4.97	30	0	0.0124479	0	78.6	504123	0.16	0.07
06-05-2021 01:47:00	32.0825	0	4.97	30	0	0.0124479	0	78.6	504123	0.16	0.07
06-05-2021 01:48:00	32.0992	0	4.97	30	0	0.0124479	0	78.6	504123	0.16	0.07
06-05-2021 01:49:00	32.1158	0	4.97	30	0	0.0124479	0	78.6	504123	0.16	0.07
06-05-2021 01:50:00	32.1325	0	4.97	30	0	0.0124479	0	78.6	504123	0.16	0.07
06-05-2021 01:51:00	32.1492	0	4.97	30	0	0.0124479	0	78.6	504123	0.16	0.07
06-05-2021 01:52:00	32.1658	0	4.97	30	0	0.0124479	0	78.6	504123	0.13	0.07
06-05-2021 01:53:00	32.1825	0	4.97	30	0	0.0124479	0	78.6	504123	0.13	0.07
06-05-2021 01:54:00	32.1992	0	4.97	30	0	0.0124479	0	78.6	504123	0.13	0.07
06-05-2021 01:55:00	32.2158	0	4.97	30	0	0.0124479	0	78.6	504123	0.13	0.07
06-05-2021 01:56:00	32.2325	0	4.97	30	0	0.0124479	0	78.6	504123	0.13	0.07
06-05-2021 01:57:00	32.2492	0	4.97	30	0	0.0124479	0	78.6	504123	0.13	0.07
06-05-2021 01:58:00	32.2658	0	4.97	30	0	0.0124479	0	78.6	504123	0.13	0.07
06-05-2021 01:59:00	32.2825	0	4.97	30	0	0.0124479	0	78.6	504123	0.13	0.07
06-05-2021 02:00:00	32.2992	0	4.97	30	0	0.0124479	0	78.6	504123	0.13	0.07
06-05-2021 02:01:00	32.3158	0	4.97	30	0	0.0124479	0	78.6	504123	0.13	0.07
06-05-2021 02:02:00	32.3325	0	4.97	30	0	0.0124479	0	78.6	504123	0.13	0.07
06-05-2021 02:03:00	32.3492	0	4.97	30	0	0.0124479	0	78.6	504123	0.13	0.07
06-05-2021 02:04:00	32.3658	0	4.97	30	0	0.0124479	0	78.6	504123	0.13	0.07
06-05-2021 02:05:00	32.3825	0	4.97	30	0	0.0124479	0	78.6	504123	0.13	0.07
06-05-2021 02:06:00	32.3992	0	4.97	30	0	0.0124479	0	78.6	504123	0.13	0.07
06-05-2021 02:07:00	32.4158	0	4.97	30	0	0.0124479	0	78.6	504123	0.13	0.07
06-05-2021 02:08:00	32.4325	0	4.97	30	0	0.0124479	0	78.6	504123	0.13	0.07
06-05-2021 02:09:00	32.4492	0	4.97	30	0	0.0124479	0	78.6	504123	0.13	0.07
06-05-2021 02:10:00	32.4658	0	4.97	30	0	0.0124479	0	78.6	504123	0.1	0.07
06-05-2021 02:11:00	32.4825	0	4.97	30	0	0.0124479	0	78.6	504123	0.1	0.07
06-05-2021 02:12:00	32.4992	0	4.97	30	0	0.0124479	0	78.6	504123	0.1	0.07
06-05-2021 02:13:00	32.5158	0	4.97	30	0	0.0124479	0	78.6	504123	0.1	0.07
06-05-2021 02:14:00	32.5325	0	4.97	30	0	0.0124479	0	78.6	504123	0.1	0.07
06-05-2021 02:15:00	32.5492	0	4.97	30	0	0.0124479	0	78.6	504123	0.1	0.07
06-05-2021 02:16:00	32.5658	0	4.97	30	0	0.0124479	0	78.6	504123	0.1	0.07
06-05-2021 02:17:00	32.5825	0	4.96	30	0	0.0124479	0	78.6	504123	0.1	0.07
06-05-2021 02:18:00	32.5992	0	4.96	30	0	0.0124479	0	78.6	504123	0.1	0.07
06-05-2021 02:19:00	32.6158	0	4.96	30	0	0.0124479	0	78.6	504123	0.1	0.07
06-05-2021 02:20:00	32.6325	0	4.96	30	0	0.0124479	0	78.6	504123	0.1	0.07
06-05-2021 02:21:00	32.6492	0	4.96	30	0	0.0124479	0	78.6	504123	0.1	0.07
06-05-2021 02:22:00	32.6658	0	4.96	30	0	0.0124479	0	78.6	504123	0.1	0.07
06-05-2021 02:23:00	32.6825	0	4.96	30	0	0.0124479	0	78.6	504123	0.1	0.07
06-05-2021 02:24:00	32.6992	0	4.96	30	0	0.0124479	0	78.6	504123	0.1	0.07
06-05-2021 02:25:00	32.7158	0	4.96	30	0	0.0124479	0	78.6	504123	0.1	0.07
06-05-2021 02:26:00	32.7325	0	4.96	30	0	0.0124479	0	78.6	504123	0.1	0.07
06-05-2021 02:27:00	32.7492	0	4.96	30	0	0.0124479	0	78.6	504123	0.08	0.07
06-05-2021 02:28:00	32.7658	0	4.96	30	0	0.0124479	0	78.6	504123	0.08	0.07
06-05-2021 02:29:00	32.7825	0	4.96	30	0	0.0124479	0	78.6	504123	0.08	0.07
06-05-2021 02:30:00	32.7992	0	4.96	30	0	0.0124479	0	78.6	504123	0.08	0.07
06-05-2021 02:31:00	32.8158	0	4.96	30	0	0.0124479	0	78.6	504123	0.08	0.07
06-05-2021 02:32:00	32.8325	0	4.96	30	0	0.0124479	0	78.6	504123	0.08	0.07
06-05-2021 02:33:00	32.8492	0	4.96	30	0	0.0124479	0	78.6	504123	0.08	0.07
06-05-2021 02:34:00	32.8658	0	4.96	30	0	0.0124479	0	78.6	504123	0.08	0.07
06-05-2021 02:35:00	32.8825	0	4.96	30	0	0.0124479	0	78.6	504123	0.08	0.07
06-05-2021 02:36:00	32.8992	0	4.96	30	0	0.0124479	0	78.6	504123	0.08	0.07
06-05-2021 02:37:00	32.9158	0	4.96	30	0	0.0124479	0	78.6	504123	0.08	0.07
06-05-2021 02:38:00	32.9325	0	4.96	30	0	0.0124479	0	78.6	504123	0.08	0.07
06-05-2021 02:39:00	32.9492	0	4.96	30	0	0.0124479	0	78.6	504123	0.08	0.07
06-05-2021 02:40:00	32.9658	0	4.96	30	0	0.0124479	0	78.6	504123	0.08	0.07
06-05-2021 02:41:00	32.9825	0	4.96	30	0	0.0124479	0	78.6	504123	0.08	0.07
06-05-2021 02:42:00	32.9992	0	4.96	30	0	0.0124479	0	78.6	504123	0.08	0.07
06-05-2021 02:43:00	33.0158	0	4.96	30	0	0.0124479	0	78.6	504123	0.08	0.07
06-05-2021 02:44:00	33.0325	0	4.96	30	0	0.0124479	0	78.6	504123	0.08	0.07
06-05-2021 02:45:00	33.0492	0	4.96	30	0	0.0124479	0	78.6	504123	0.07	0.07
06-05-2021 02:46:00	33.0658	0	4.96	30	0	0.0124479	0	78.6	504123	0.07	0.07
06-05-2021 02:47:00	33.0825	0	4.96	30	0	0.0124479	0	78.6	504123	0.07	0.07
06-05-2021 02:48:00	33.0992	0	4.96	30	0	0.0124479	0	78.6	504123	0.07	0.07
06-05-2021 02:49:00	33.1158	0	4.96	30	0	0.0124479	0	78.6	504123	0.07	0.07
06-05-2021 02:50:00	33.1325	0	4.96	30	0	0.0124479	0	78.6	504123	0.07	0.07
06-05-2021 02:51:00	33.1492	0	4.96	30	0	0.0124479	0	78.6	504123	0.07	0.07
06-05-2021 02:52:00	33.1658	0	4.96	30	0	0.0124479	0	78.6	504123	0.07	0.07
06-05-2021 02:53:00	33.1825	0	4.96	30	0	0.0124479	0	78.6	504123	0.07	0.07
06-05-2021 02:54:00	33.1992	0	4.96	30	0	0.0124479	0	78.6	504123	0.07	0.07
06-05-2021 02:55:00	33.2158	0	4.96	30	0	0.0124479	0	78.6	504123	0.07	0.07
06-05-2021 02:56:00	33.2325	0	4.96	30	0	0.0124479	0	78.6	504123	0.07	0.07
06-05-2021 02:57:00	33.2492	0	4.96	30	0	0.0124479	0	78.6	504123	0.07	0.07
06-05-2021 02:58:00	33.2658	0	4.96	30	0	0.0124479	0	78.6	504123	0.07	0.07
06-05-2021 02:59:00	33.2825	0	4.96	30	0	0.0124479	0	78.6	504123	0.07	0.07
06-05-2021 03:00:00	33.2992	0	4.96	30	0	0.0124479	0	78.6	504123	0.07	0.07
[truncated: 203,091+ more rows]

## Sheet: Replicate 2 Cal DM Suc
DM_sucrose	ΔDM_sucrose cumulative	Weight bottle (g)	Weight added to reactor cumulative (g)	Approximate volume added (mL)
4455	0	1284.9	0	0
4482	27	1283	1.9	1.58333
4510	55	1281.2	3.7	3.08333
4624	169	1273.5	11.4	9.5
4647	192	1271.9	13	10.8333
4669	214	1270.4	14.5	12.0833
4700	245	1268.3	16.6	13.8333
	relation mass			relation volume
	0.0675671	0.0180662		0.056352	0.0124479
	0.000198373	0.0274605		0.000131034	0.0207182
	0.999966	0.0411515		0.999973	0.0317661
Approximate Density of 50% (w/v) sucrose
1.2	g/ml
