# Supplementary material for: Novel Evolutionary Engineering Approach to Alter Substrate Specificity of Disaccharide Transporter Mal11 in Saccharomyces cerevisiae
Source: J Fungi (Basel). 2022 Mar 30;8(4):358. doi: 10.3390/jof8040358 (PMC9024999; doi:10.3390/jof8040358)
Supplement: Supplementary file 1 [file jof-08-00358-s001.zip › Supplementary Data S2.xlsx]

## Sheet: Read_me
Tab	Description
Plate contents	Strains and media present in each well. MTP[X] corresponds to the plate position in the growth profiler and is consistently used throughout the document. Each well contained synthetic medium, supplemented with sugars as indicated in this tab. Glu=glucose, suc=sucrose, mal=maltose
MTP[X]_raw	Raw green values measured during growth experiment
MTP[X]_well-to-well	Raw green values for a plate in which all wells have been filled with a CEN.PK113-7D suspension in water with OD 4.2, multiple measurements have been taken in time. The averages of these measurements for each well are represented in a heat map. From these averages, correction factors for well-to-well variation have been calculated as the ratio between the average of the entire plate and the avera…
Cal plate contents	OD660 in each well of plates used for conversion of raw green values to OD660 that were moved across the different plate positions in the growth profiler
MTP[X]_cal	Raw green values of plate filled with suspensions of CEN.PK113-7D (yellow timepoints) and IMS1230 (green time points) in water with known OD values (described in Cal plate content)
MTP[X]_cal+wellcorr	MTP[X]_cal green values, corrected for well-to-well variation
CAL	Fitting of third degree polynomial through MTP[X]_cal+wellcorr values and corresponding OD values. Since no clear difference between CEN.PK113-7D and IMS1230 were observed for the relation between green values and OD660, only the values for CEN.PK113-7D were used for the fitting. The resulting relation, shown in thick-bordered box, was used for conversion of green values to OD660.
MTP[X]_wellcorr	MTP[X] green values (during growth experiment), corrected for well-to-well variation
MTP[X]_OD	OD660 values during growth experiment, determined from MTP[X]_wellcorr using the third-degree polynomial from CAL
Growth rates	Maximum specific growth rates calculated from the exponential phase in each well. Each combination of strains and media was present in three wells, resulting in three independently measured growth rates (µ1, µ2 and µ3). R-squared of the corresponding exponential trends are given in adjacent cells (R^2_1, R^2_2 and R^2_3). From the three replicates, averages (µ(average)) and mean deviations (avdev…

## Sheet: Plate contents
MTP1	1	2	3	4	5	6	7	8	9	10	11	12
A	IMZ786	IMZ786	IMZ786	IMZ786	IMZ786	IMZ786	IMZ786	IMZ786	IMZ786	IMZ786	IMZ786	IMZ786
	20 g/L suc	20 g/L suc	20 g/L suc	20 g/L mal	20 g/L mal	20 g/L mal	20 g/L glu	20 g/L glu	20 g/L glu	2 g/L glu	2 g/L glu	2 g/L glu
B	IMS1225	IMS1225	IMS1225	IMS1225	IMS1225	IMS1225	IMS1225	IMS1225	IMS1225	IMS1225	IMS1225	IMS1225
	20 g/L suc	20 g/L suc	20 g/L suc	20 g/L mal	20 g/L mal	20 g/L mal	20 g/L glu	20 g/L glu	20 g/L glu	2 g/L glu	2 g/L glu	2 g/L glu
C	IMS1226	IMS1226	IMS1226	IMS1226	IMS1226	IMS1226	IMS1226	IMS1226	IMS1226	IMS1226	IMS1226	IMS1226
	20 g/L suc	20 g/L suc	20 g/L suc	20 g/L mal	20 g/L mal	20 g/L mal	20 g/L glu	20 g/L glu	20 g/L glu	2 g/L glu	2 g/L glu	2 g/L glu
D	CEN.PK113-7D	CEN.PK113-7D	CEN.PK113-7D	CEN.PK113-7D	CEN.PK113-7D	CEN.PK113-7D	CEN.PK113-7D	CEN.PK113-7D	CEN.PK113-7D	CEN.PK113-7D	CEN.PK113-7D	CEN.PK113-7D
	20 g/L suc	20 g/L suc	20 g/L suc	20 g/L mal	20 g/L mal	20 g/L mal	20 g/L glu	20 g/L glu	20 g/L glu	2 g/L glu	2 g/L glu	2 g/L glu
E	IMS1230	IMS1230	IMS1230	IMS1230	IMS1230	IMS1230	IMS1230	IMS1230	IMS1230	IMS1230	IMS1230	IMS1230
	20 g/L suc	20 g/L suc	20 g/L suc	20 g/L mal	20 g/L mal	20 g/L mal	20 g/L glu	20 g/L glu	20 g/L glu	2 g/L glu	2 g/L glu	2 g/L glu
F	IMS1231	IMS1231	IMS1231	IMS1231	IMS1231	IMS1231	IMS1231	IMS1231	IMS1231	IMS1231	IMS1231	IMS1231
	20 g/L suc	20 g/L suc	20 g/L suc	20 g/L mal	20 g/L mal	20 g/L mal	20 g/L glu	20 g/L glu	20 g/L glu	2 g/L glu	2 g/L glu	2 g/L glu
G	IME753	IME753	IME753	IME753	IME753	IME753	IME753	IME753	IME753	IME753	IME753	IME753
	20 g/L suc	20 g/L suc	20 g/L suc	20 g/L mal	20 g/L mal	20 g/L mal	20 g/L glu	20 g/L glu	20 g/L glu	2 g/L glu	2 g/L glu	2 g/L glu
H	IME754	IME754	IME754	IME754	IME754	IME754	IME754	IME754	IME754	IME754	IME754	IME754
	20 g/L suc	20 g/L suc	20 g/L suc	20 g/L mal	20 g/L mal	20 g/L mal	20 g/L glu	20 g/L glu	20 g/L glu	2 g/L glu	2 g/L glu	2 g/L glu
MTP2	1	2	3	4	5	6	7	8	9	10	11	12
A	IMZ786	IMZ786	IMZ786	IMZ786	IMZ786	IMZ786	IMZ786	IMZ786	IMZ786	IMZ786	IMZ786	IMZ786
	20 g/L glu + 20 g/L suc	20 g/L glu + 20 g/L suc	20 g/L glu + 20 g/L suc	20 g/L glu + 10 g/L suc	20 g/L glu + 10 g/L suc	20 g/L glu + 10 g/L suc	20 g/L glu + 5 g/L suc	20 g/L glu + 5 g/L suc	20 g/L glu + 5 g/L suc	20 g/L glu + 2.5 g/L suc	20 g/L glu + 2.5 g/L suc	20 g/L glu + 2.5 g/L suc
B	IMS1225	IMS1225	IMS1225	IMS1225	IMS1225	IMS1225	IMS1225	IMS1225	IMS1225	IMS1225	IMS1225	IMS1225
	20 g/L glu + 20 g/L suc	20 g/L glu + 20 g/L suc	20 g/L glu + 20 g/L suc	20 g/L glu + 10 g/L suc	20 g/L glu + 10 g/L suc	20 g/L glu + 10 g/L suc	20 g/L glu + 5 g/L suc	20 g/L glu + 5 g/L suc	20 g/L glu + 5 g/L suc	20 g/L glu + 2.5 g/L suc	20 g/L glu + 2.5 g/L suc	20 g/L glu + 2.5 g/L suc
C	IMS1226	IMS1226	IMS1226	IMS1226	IMS1226	IMS1226	IMS1226	IMS1226	IMS1226	IMS1226	IMS1226	IMS1226
	20 g/L glu + 20 g/L suc	20 g/L glu + 20 g/L suc	20 g/L glu + 20 g/L suc	20 g/L glu + 10 g/L suc	20 g/L glu + 10 g/L suc	20 g/L glu + 10 g/L suc	20 g/L glu + 5 g/L suc	20 g/L glu + 5 g/L suc	20 g/L glu + 5 g/L suc	20 g/L glu + 2.5 g/L suc	20 g/L glu + 2.5 g/L suc	20 g/L glu + 2.5 g/L suc
D	CEN.PK113-7D	CEN.PK113-7D	CEN.PK113-7D	CEN.PK113-7D	CEN.PK113-7D	CEN.PK113-7D	CEN.PK113-7D	CEN.PK113-7D	CEN.PK113-7D	CEN.PK113-7D	CEN.PK113-7D	CEN.PK113-7D
	20 g/L glu + 20 g/L suc	20 g/L glu + 20 g/L suc	20 g/L glu + 20 g/L suc	20 g/L glu + 10 g/L suc	20 g/L glu + 10 g/L suc	20 g/L glu + 10 g/L suc	20 g/L glu + 5 g/L suc	20 g/L glu + 5 g/L suc	20 g/L glu + 5 g/L suc	20 g/L glu + 2.5 g/L suc	20 g/L glu + 2.5 g/L suc	20 g/L glu + 2.5 g/L suc
E	IMS1230	IMS1230	IMS1230	IMS1230	IMS1230	IMS1230	IMS1230	IMS1230	IMS1230	IMS1230	IMS1230	IMS1230
	20 g/L glu + 20 g/L suc	20 g/L glu + 20 g/L suc	20 g/L glu + 20 g/L suc	20 g/L glu + 10 g/L suc	20 g/L glu + 10 g/L suc	20 g/L glu + 10 g/L suc	20 g/L glu + 5 g/L suc	20 g/L glu + 5 g/L suc	20 g/L glu + 5 g/L suc	20 g/L glu + 2.5 g/L suc	20 g/L glu + 2.5 g/L suc	20 g/L glu + 2.5 g/L suc
F	IMS1231	IMS1231	IMS1231	IMS1231	IMS1231	IMS1231	IMS1231	IMS1231	IMS1231	IMS1231	IMS1231	IMS1231
	20 g/L glu + 20 g/L suc	20 g/L glu + 20 g/L suc	20 g/L glu + 20 g/L suc	20 g/L glu + 10 g/L suc	20 g/L glu + 10 g/L suc	20 g/L glu + 10 g/L suc	20 g/L glu + 5 g/L suc	20 g/L glu + 5 g/L suc	20 g/L glu + 5 g/L suc	20 g/L glu + 2.5 g/L suc	20 g/L glu + 2.5 g/L suc	20 g/L glu + 2.5 g/L suc
G	IME753	IME753	IME753	IME753	IME753	IME753	IME753	IME753	IME753	IME753	IME753	IME753
	20 g/L glu + 20 g/L suc	20 g/L glu + 20 g/L suc	20 g/L glu + 20 g/L suc	20 g/L glu + 10 g/L suc	20 g/L glu + 10 g/L suc	20 g/L glu + 10 g/L suc	20 g/L glu + 5 g/L suc	20 g/L glu + 5 g/L suc	20 g/L glu + 5 g/L suc	20 g/L glu + 2.5 g/L suc	20 g/L glu + 2.5 g/L suc	20 g/L glu + 2.5 g/L suc
H	IME754	IME754	IME754	IME754	IME754	IME754	IME754	IME754	IME754	IME754	IME754	IME754
	20 g/L glu + 20 g/L suc	20 g/L glu + 20 g/L suc	20 g/L glu + 20 g/L suc	20 g/L glu + 10 g/L suc	20 g/L glu + 10 g/L suc	20 g/L glu + 10 g/L suc	20 g/L glu + 5 g/L suc	20 g/L glu + 5 g/L suc	20 g/L glu + 5 g/L suc	20 g/L glu + 2.5 g/L suc	20 g/L glu + 2.5 g/L suc	20 g/L glu + 2.5 g/L suc
MTP3	1	2	3	4	5	6	7	8	9	10	11	12
A	IMZ786	IMZ786	IMZ786	IMZ786	IMZ786	IMZ786	IMZ786	IMZ786	IMZ786	IMZ786	IMZ786	IMZ786
	20 g/L glu + 1.25 g/L suc	20 g/L glu + 1.25 g/L suc	20 g/L glu + 1.25 g/L suc	20 g/L glu + 0.63 g/L suc	20 g/L glu + 0.63 g/L suc	20 g/L glu + 0.63 g/L suc	20 g/L glu + 0.31 g/L suc	20 g/L glu + 0.31 g/L suc	20 g/L glu + 0.31 g/L suc	20 g/L glu + 0.16 g/L suc	20 g/L glu + 0.16 g/L suc	20 g/L glu + 0.16 g/L suc
B	IMS1225	IMS1225	IMS1225	IMS1225	IMS1225	IMS1225	IMS1225	IMS1225	IMS1225	IMS1225	IMS1225	IMS1225
	20 g/L glu + 1.25 g/L suc	20 g/L glu + 1.25 g/L suc	20 g/L glu + 1.25 g/L suc	20 g/L glu + 0.63 g/L suc	20 g/L glu + 0.63 g/L suc	20 g/L glu + 0.63 g/L suc	20 g/L glu + 0.31 g/L suc	20 g/L glu + 0.31 g/L suc	20 g/L glu + 0.31 g/L suc	20 g/L glu + 0.16 g/L suc	20 g/L glu + 0.16 g/L suc	20 g/L glu + 0.16 g/L suc
C	IMS1226	IMS1226	IMS1226	IMS1226	IMS1226	IMS1226	IMS1226	IMS1226	IMS1226	IMS1226	IMS1226	IMS1226
	20 g/L glu + 1.25 g/L suc	20 g/L glu + 1.25 g/L suc	20 g/L glu + 1.25 g/L suc	20 g/L glu + 0.63 g/L suc	20 g/L glu + 0.63 g/L suc	20 g/L glu + 0.63 g/L suc	20 g/L glu + 0.31 g/L suc	20 g/L glu + 0.31 g/L suc	20 g/L glu + 0.31 g/L suc	20 g/L glu + 0.16 g/L suc	20 g/L glu + 0.16 g/L suc	20 g/L glu + 0.16 g/L suc
D	CEN.PK113-7D	CEN.PK113-7D	CEN.PK113-7D	CEN.PK113-7D	CEN.PK113-7D	CEN.PK113-7D	CEN.PK113-7D	CEN.PK113-7D	CEN.PK113-7D	CEN.PK113-7D	CEN.PK113-7D	CEN.PK113-7D
	20 g/L glu + 1.25 g/L suc	20 g/L glu + 1.25 g/L suc	20 g/L glu + 1.25 g/L suc	20 g/L glu + 0.63 g/L suc	20 g/L glu + 0.63 g/L suc	20 g/L glu + 0.63 g/L suc	20 g/L glu + 0.31 g/L suc	20 g/L glu + 0.31 g/L suc	20 g/L glu + 0.31 g/L suc	20 g/L glu + 0.16 g/L suc	20 g/L glu + 0.16 g/L suc	20 g/L glu + 0.16 g/L suc
E	IMS1230	IMS1230	IMS1230	IMS1230	IMS1230	IMS1230	IMS1230	IMS1230	IMS1230	IMS1230	IMS1230	IMS1230
	20 g/L glu + 1.25 g/L suc	20 g/L glu + 1.25 g/L suc	20 g/L glu + 1.25 g/L suc	20 g/L glu + 0.63 g/L suc	20 g/L glu + 0.63 g/L suc	20 g/L glu + 0.63 g/L suc	20 g/L glu + 0.31 g/L suc	20 g/L glu + 0.31 g/L suc	20 g/L glu + 0.31 g/L suc	20 g/L glu + 0.16 g/L suc	20 g/L glu + 0.16 g/L suc	20 g/L glu + 0.16 g/L suc
F	IMS1231	IMS1231	IMS1231	IMS1231	IMS1231	IMS1231	IMS1231	IMS1231	IMS1231	IMS1231	IMS1231	IMS1231
	20 g/L glu + 1.25 g/L suc	20 g/L glu + 1.25 g/L suc	20 g/L glu + 1.25 g/L suc	20 g/L glu + 0.63 g/L suc	20 g/L glu + 0.63 g/L suc	20 g/L glu + 0.63 g/L suc	20 g/L glu + 0.31 g/L suc	20 g/L glu + 0.31 g/L suc	20 g/L glu + 0.31 g/L suc	20 g/L glu + 0.16 g/L suc	20 g/L glu + 0.16 g/L suc	20 g/L glu + 0.16 g/L suc
G	IME753	IME753	IME753	IME753	IME753	IME753	IME753	IME753	IME753	IME753	IME753	IME753
	20 g/L glu + 1.25 g/L suc	20 g/L glu + 1.25 g/L suc	20 g/L glu + 1.25 g/L suc	20 g/L glu + 0.63 g/L suc	20 g/L glu + 0.63 g/L suc	20 g/L glu + 0.63 g/L suc	20 g/L glu + 0.31 g/L suc	20 g/L glu + 0.31 g/L suc	20 g/L glu + 0.31 g/L suc	20 g/L glu + 0.16 g/L suc	20 g/L glu + 0.16 g/L suc	20 g/L glu + 0.16 g/L suc
H	IME754	IME754	IME754	IME754	IME754	IME754	IME754	IME754	IME754	IME754	IME754	IME754
	20 g/L glu + 1.25 g/L suc	20 g/L glu + 1.25 g/L suc	20 g/L glu + 1.25 g/L suc	20 g/L glu + 0.63 g/L suc	20 g/L glu + 0.63 g/L suc	20 g/L glu + 0.63 g/L suc	20 g/L glu + 0.31 g/L suc	20 g/L glu + 0.31 g/L suc	20 g/L glu + 0.31 g/L suc	20 g/L glu + 0.16 g/L suc	20 g/L glu + 0.16 g/L suc	20 g/L glu + 0.16 g/L suc
MTP4	1	2	3	4	5	6	7	8	9	10	11	12
A	IMZ786	IMZ786	IMZ786	IMZ786	IMZ786	IMZ786	IMZ786	IMZ786	IMZ786	IMZ786	IMZ786	IMZ786
	20 g/L glu + 20 g/L mal	20 g/L glu + 20 g/L mal	20 g/L glu + 20 g/L mal	20 g/L glu + 10 g/L mal	20 g/L glu + 10 g/L mal	20 g/L glu + 10 g/L mal	20 g/L glu + 5 g/L mal	20 g/L glu + 5 g/L mal	20 g/L glu + 5 g/L mal	20 g/L glu + 2.5 g/L mal	20 g/L glu + 2.5 g/L mal	20 g/L glu + 2.5 g/L mal
B	IMS1225	IMS1225	IMS1225	IMS1225	IMS1225	IMS1225	IMS1225	IMS1225	IMS1225	IMS1225	IMS1225	IMS1225
	20 g/L glu + 20 g/L mal	20 g/L glu + 20 g/L mal	20 g/L glu + 20 g/L mal	20 g/L glu + 10 g/L mal	20 g/L glu + 10 g/L mal	20 g/L glu + 10 g/L mal	20 g/L glu + 5 g/L mal	20 g/L glu + 5 g/L mal	20 g/L glu + 5 g/L mal	20 g/L glu + 2.5 g/L mal	20 g/L glu + 2.5 g/L mal	20 g/L glu + 2.5 g/L mal
C	IMS1226	IMS1226	IMS1226	IMS1226	IMS1226	IMS1226	IMS1226	IMS1226	IMS1226	IMS1226	IMS1226	IMS1226
	20 g/L glu + 20 g/L mal	20 g/L glu + 20 g/L mal	20 g/L glu + 20 g/L mal	20 g/L glu + 10 g/L mal	20 g/L glu + 10 g/L mal	20 g/L glu + 10 g/L mal	20 g/L glu + 5 g/L mal	20 g/L glu + 5 g/L mal	20 g/L glu + 5 g/L mal	20 g/L glu + 2.5 g/L mal	20 g/L glu + 2.5 g/L mal	20 g/L glu + 2.5 g/L mal
D	CEN.PK113-7D	CEN.PK113-7D	CEN.PK113-7D	CEN.PK113-7D	CEN.PK113-7D	CEN.PK113-7D	CEN.PK113-7D	CEN.PK113-7D	CEN.PK113-7D	CEN.PK113-7D	CEN.PK113-7D	CEN.PK113-7D
	20 g/L glu + 20 g/L mal	20 g/L glu + 20 g/L mal	20 g/L glu + 20 g/L mal	20 g/L glu + 10 g/L mal	20 g/L glu + 10 g/L mal	20 g/L glu + 10 g/L mal	20 g/L glu + 5 g/L mal	20 g/L glu + 5 g/L mal	20 g/L glu + 5 g/L mal	20 g/L glu + 2.5 g/L mal	20 g/L glu + 2.5 g/L mal	20 g/L glu + 2.5 g/L mal
E	IMS1230	IMS1230	IMS1230	IMS1230	IMS1230	IMS1230	IMS1230	IMS1230	IMS1230	IMS1230	IMS1230	IMS1230
	20 g/L glu + 20 g/L mal	20 g/L glu + 20 g/L mal	20 g/L glu + 20 g/L mal	20 g/L glu + 10 g/L mal	20 g/L glu + 10 g/L mal	20 g/L glu + 10 g/L mal	20 g/L glu + 5 g/L mal	20 g/L glu + 5 g/L mal	20 g/L glu + 5 g/L mal	20 g/L glu + 2.5 g/L mal	20 g/L glu + 2.5 g/L mal	20 g/L glu + 2.5 g/L mal
F	IMS1231	IMS1231	IMS1231	IMS1231	IMS1231	IMS1231	IMS1231	IMS1231	IMS1231	IMS1231	IMS1231	IMS1231
	20 g/L glu + 20 g/L mal	20 g/L glu + 20 g/L mal	20 g/L glu + 20 g/L mal	20 g/L glu + 10 g/L mal	20 g/L glu + 10 g/L mal	20 g/L glu + 10 g/L mal	20 g/L glu + 5 g/L mal	20 g/L glu + 5 g/L mal	20 g/L glu + 5 g/L mal	20 g/L glu + 2.5 g/L mal	20 g/L glu + 2.5 g/L mal	20 g/L glu + 2.5 g/L mal
G	IME753	IME753	IME753	IME753	IME753	IME753	IME753	IME753	IME753	IME753	IME753	IME753
	20 g/L glu + 20 g/L mal	20 g/L glu + 20 g/L mal	20 g/L glu + 20 g/L mal	20 g/L glu + 10 g/L mal	20 g/L glu + 10 g/L mal	20 g/L glu + 10 g/L mal	20 g/L glu + 5 g/L mal	20 g/L glu + 5 g/L mal	20 g/L glu + 5 g/L mal	20 g/L glu + 2.5 g/L mal	20 g/L glu + 2.5 g/L mal	20 g/L glu + 2.5 g/L mal
H	IME754	IME754	IME754	IME754	IME754	IME754	IME754	IME754	IME754	IME754	IME754	IME754
	20 g/L glu + 20 g/L mal	20 g/L glu + 20 g/L mal	20 g/L glu + 20 g/L mal	20 g/L glu + 10 g/L mal	20 g/L glu + 10 g/L mal	20 g/L glu + 10 g/L mal	20 g/L glu + 5 g/L mal	20 g/L glu + 5 g/L mal	20 g/L glu + 5 g/L mal	20 g/L glu + 2.5 g/L mal	20 g/L glu + 2.5 g/L mal	20 g/L glu + 2.5 g/L mal
MTP6	1	2	3	4	5	6	7	8	9	10	11	12
A	IMZ786	IMZ786	IMZ786	IMZ786	IMZ786	IMZ786	IMZ786	IMZ786	IMZ786	IMZ786	IMZ786	IMZ786
	20 g/L glu + 1.25 g/L mal	20 g/L glu + 1.25 g/L mal	20 g/L glu + 1.25 g/L mal	20 g/L glu + 0.63 g/L mal	20 g/L glu + 0.63 g/L mal	20 g/L glu + 0.63 g/L mal	20 g/L glu + 0.31 g/L mal	20 g/L glu + 0.31 g/L mal	20 g/L glu + 0.31 g/L mal	20 g/L glu + 0.16 g/L mal	20 g/L glu + 0.16 g/L mal	20 g/L glu + 0.16 g/L mal
B	IMS1225	IMS1225	IMS1225	IMS1225	IMS1225	IMS1225	IMS1225	IMS1225	IMS1225	IMS1225	IMS1225	IMS1225
	20 g/L glu + 1.25 g/L mal	20 g/L glu + 1.25 g/L mal	20 g/L glu + 1.25 g/L mal	20 g/L glu + 0.63 g/L mal	20 g/L glu + 0.63 g/L mal	20 g/L glu + 0.63 g/L mal	20 g/L glu + 0.31 g/L mal	20 g/L glu + 0.31 g/L mal	20 g/L glu + 0.31 g/L mal	20 g/L glu + 0.16 g/L mal	20 g/L glu + 0.16 g/L mal	20 g/L glu + 0.16 g/L mal
C	IMS1226	IMS1226	IMS1226	IMS1226	IMS1226	IMS1226	IMS1226	IMS1226	IMS1226	IMS1226	IMS1226	IMS1226
	20 g/L glu + 1.25 g/L mal	20 g/L glu + 1.25 g/L mal	20 g/L glu + 1.25 g/L mal	20 g/L glu + 0.63 g/L mal	20 g/L glu + 0.63 g/L mal	20 g/L glu + 0.63 g/L mal	20 g/L glu + 0.31 g/L mal	20 g/L glu + 0.31 g/L mal	20 g/L glu + 0.31 g/L mal	20 g/L glu + 0.16 g/L mal	20 g/L glu + 0.16 g/L mal	20 g/L glu + 0.16 g/L mal
D	CEN.PK113-7D	CEN.PK113-7D	CEN.PK113-7D	CEN.PK113-7D	CEN.PK113-7D	CEN.PK113-7D	CEN.PK113-7D	CEN.PK113-7D	CEN.PK113-7D	CEN.PK113-7D	CEN.PK113-7D	CEN.PK113-7D
	20 g/L glu + 1.25 g/L mal	20 g/L glu + 1.25 g/L mal	20 g/L glu + 1.25 g/L mal	20 g/L glu + 0.63 g/L mal	20 g/L glu + 0.63 g/L mal	20 g/L glu + 0.63 g/L mal	20 g/L glu + 0.31 g/L mal	20 g/L glu + 0.31 g/L mal	20 g/L glu + 0.31 g/L mal	20 g/L glu + 0.16 g/L mal	20 g/L glu + 0.16 g/L mal	20 g/L glu + 0.16 g/L mal
E	IMS1230	IMS1230	IMS1230	IMS1230	IMS1230	IMS1230	IMS1230	IMS1230	IMS1230	IMS1230	IMS1230	IMS1230
	20 g/L glu + 1.25 g/L mal	20 g/L glu + 1.25 g/L mal	20 g/L glu + 1.25 g/L mal	20 g/L glu + 0.63 g/L mal	20 g/L glu + 0.63 g/L mal	20 g/L glu + 0.63 g/L mal	20 g/L glu + 0.31 g/L mal	20 g/L glu + 0.31 g/L mal	20 g/L glu + 0.31 g/L mal	20 g/L glu + 0.16 g/L mal	20 g/L glu + 0.16 g/L mal	20 g/L glu + 0.16 g/L mal
F	IMS1231	IMS1231	IMS1231	IMS1231	IMS1231	IMS1231	IMS1231	IMS1231	IMS1231	IMS1231	IMS1231	IMS1231
	20 g/L glu + 1.25 g/L mal	20 g/L glu + 1.25 g/L mal	20 g/L glu + 1.25 g/L mal	20 g/L glu + 0.63 g/L mal	20 g/L glu + 0.63 g/L mal	20 g/L glu + 0.63 g/L mal	20 g/L glu + 0.31 g/L mal	20 g/L glu + 0.31 g/L mal	20 g/L glu + 0.31 g/L mal	20 g/L glu + 0.16 g/L mal	20 g/L glu + 0.16 g/L mal	20 g/L glu + 0.16 g/L mal
G	IME753	IME753	IME753	IME753	IME753	IME753	IME753	IME753	IME753	IME753	IME753	IME753
	20 g/L glu + 1.25 g/L mal	20 g/L glu + 1.25 g/L mal	20 g/L glu + 1.25 g/L mal	20 g/L glu + 0.63 g/L mal	20 g/L glu + 0.63 g/L mal	20 g/L glu + 0.63 g/L mal	20 g/L glu + 0.31 g/L mal	20 g/L glu + 0.31 g/L mal	20 g/L glu + 0.31 g/L mal	20 g/L glu + 0.16 g/L mal	20 g/L glu + 0.16 g/L mal	20 g/L glu + 0.16 g/L mal
H	IME754	IME754	IME754	IME754	IME754	IME754	IME754	IME754	IME754	IME754	IME754	IME754
	20 g/L glu + 1.25 g/L mal	20 g/L glu + 1.25 g/L mal	20 g/L glu + 1.25 g/L mal	20 g/L glu + 0.63 g/L mal	20 g/L glu + 0.63 g/L mal	20 g/L glu + 0.63 g/L mal	20 g/L glu + 0.31 g/L mal	20 g/L glu + 0.31 g/L mal	20 g/L glu + 0.31 g/L mal	20 g/L glu + 0.16 g/L mal	20 g/L glu + 0.16 g/L mal	20 g/L glu + 0.16 g/L mal

## Sheet: MTP1_raw
Time (h)	Time (min)	A1	A2	A3	A4	A5	A6	A7	A8	A9	A10	A11	A12	B1	B2	B3	B4	B5	B6	B7	B8	B9	B10	B11	B12	C1	C2	C3	C4	C5	C6	C7	C8	C9	C10	C11	C12	D1	D2	D3	D4	D5	D6	D7	D8	D9	D10	D11	D12
0	0	7.516	6.702	7.543	8.422	9.665	10.559	9.435	8.594	7.516	7.065	6.784	7.937	7.584	7.441	7.214	7.963	9.306	10.039	9.114	8.725	8.631	7.761	7.89	7.696	6.757	6.629	7.488	7.514	7.822	8.055	8.269	8.751	8.198	7.724	7.104	6.624	6.349	6.075	7.435	7.008	7.294	7.665	7.861	8.378	7.28	6.761	5.829	5.749
0.333333	20	7.512	6.918	7.961	8.829	9.922	10.712	9.482	8.296	7.302	7.235	6.88	8.059	7.553	7.724	7.61	8.196	9.573	10.025	9.29	8.406	8.871	7.104	7.067	7.851	6.914	6.906	7.688	7.812	7.994	8.157	8.041	8.133	8.135	7.473	6.731	6.551	6.382	6.241	7.604	7.055	7.418	7.698	7.741	8.484	7.324	6.737	5.865	5.884
0.666667	40	7.402	6.945	8.112	9.32	10.22	10.459	8.81	7.422	6.702	6.773	6.112	7.302	7.427	7.657	7.784	8.292	9.41	9.571	8.506	7.853	8.024	7.014	6.894	7.061	6.943	7.122	7.767	7.947	8.039	8.061	7.786	8.037	7.792	7.416	6.398	6.184	6.433	6.561	7.796	7.347	7.38	7.594	7.388	8.157	6.976	6.52	5.688	5.727
1	60	7.59	6.912	8.02	9.114	10.022	10.714	9.716	8.255	7.363	7.369	6.778	7.935	7.614	7.59	7.641	8.429	9.761	9.961	9.025	8.461	8.608	7.245	7.173	7.475	6.876	6.99	7.798	7.831	8.006	8.078	8.088	8.22	8.045	7.671	6.71	6.496	6.435	6.482	7.837	7.161	7.343	7.61	7.651	8.712	7.308	6.904	6.143	6.133
1.33333	80	7.518	6.741	7.696	8.616	9.522	10.19	9.471	8.014	7.145	6.89	6.367	7.467	7.333	7.32	7.396	7.955	9.143	9.504	8.614	7.865	8.229	7.129	7.078	6.975	6.88	6.914	7.653	7.696	7.849	7.873	7.88	7.849	7.922	7.62	6.561	6.178	6.394	6.357	7.567	6.965	7.131	7.471	7.716	8.402	7.169	6.782	6.02	6.208
1.66667	100	7.535	6.759	7.714	8.794	9.712	10.31	9.173	7.882	7.096	6.769	6.182	7.292	7.314	7.343	7.435	7.902	9.118	9.486	8.531	7.627	8.071	7.147	7.08	7.041	6.92	7.012	7.698	7.775	7.857	7.898	7.894	8.125	7.855	7.647	6.724	6.259	6.451	6.535	7.755	7.102	7.261	7.51	7.816	8.49	7.284	6.892	6.133	6.347
2	120	7.645	6.837	8.218	8.969	9.984	10.81	10.11	8.988	7.878	7.163	6.739	7.698	7.549	7.669	7.541	8.524	9.725	10.12	8.706	7.806	8.204	7.439	7.404	7.282	6.994	7.047	7.843	7.996	8.106	8.21	7.982	8.075	7.89	7.831	6.869	6.412	6.537	6.494	7.835	7.331	7.551	7.824	8.296	8.99	7.796	7.441	6.559	6.878
2.33333	140	7.559	6.796	7.912	8.871	9.906	10.382	9.755	8.378	7.439	7.145	6.598	7.657	7.394	7.384	7.439	8.2	9.414	9.863	9.237	8.502	8.433	7.631	7.671	7.525	6.955	6.982	7.724	7.763	7.861	7.898	8.29	8.482	8.065	8.008	7.153	6.592	6.592	6.433	7.922	7.225	7.355	7.641	8.398	9.28	8.016	7.637	6.72	6.976
2.66667	160	7.535	6.647	7.624	8.561	9.51	10.425	9.724	8.888	7.975	7.192	6.641	7.588	7.329	7.245	7.165	7.763	9.108	9.527	9.573	8.859	9.131	7.784	7.773	7.716	7.01	6.927	7.637	7.627	7.757	7.924	8.482	8.865	8.551	8.306	7.331	6.816	6.661	6.49	7.727	7.065	7.278	7.657	8.678	9.614	8.496	8.024	7.092	7.239
3	180	7.602	6.884	8	8.902	9.912	10.757	9.992	8.988	7.906	7.255	6.629	7.618	7.614	7.602	7.584	8.441	9.763	10.086	10.206	9.588	9.763	7.986	7.653	7.876	7.065	7.157	7.943	7.908	7.959	8.125	8.969	9.296	8.816	8.361	7.384	6.82	6.829	6.867	8.261	7.529	7.751	8.025	8.824	9.875	8.669	8.265	7.425	7.61
3.33333	200	7.708	6.876	8.053	8.808	9.908	10.6	10.398	9.647	8.635	7.531	7.061	7.939	7.673	7.625	7.482	8.41	9.814	10.078	10.965	10.675	10.578	8.361	8.098	8.48	7.12	7.141	7.89	7.878	8.004	8.08	9.618	9.916	9.129	8.727	7.647	7.233	6.973	6.927	8.388	7.694	7.918	8.159	9.376	10.476	9.239	8.618	7.982	8.371
3.66667	220	7.567	6.759	7.767	8.555	9.565	10.373	9.859	9.096	8.145	7.251	6.741	7.663	7.284	7.312	7.212	7.925	9.02	9.443	11.786	11.81	11.743	8.749	8.765	8.235	7.106	7.012	7.827	7.753	7.835	7.894	10.42	10.869	10.075	9.071	8.11	7.278	7.143	7.039	8.367	7.618	7.835	8.149	10.086	10.775	9.569	9.229	8.41	8.445
4	240	7.673	6.996	8.112	9.053	9.875	10.331	9.49	8.531	7.69	6.992	6.324	7.516	7.39	7.529	7.596	8.359	9.269	9.429	12.586	12.816	13.153	8.969	8.976	8.4	7.143	7.224	7.904	7.988	8.096	8.08	11.165	11.537	11	9.29	8.249	7.506	7.392	7.247	8.861	8.28	8.108	8.435	11.333	11.28	9.598	9.559	8.741	8.588
4.33333	260	7.698	6.882	7.943	8.567	9.637	10.384	9.682	8.694	7.88	7.08	6.422	7.557	7.367	7.376	7.345	8.078	9.135	9.437	13.127	13.269	13.841	9.618	9.694	8.929	7.178	7.045	7.9	7.894	7.998	7.988	11.594	12.239	11.998	9.727	8.722	7.853	7.661	7.492	8.963	8.145	8.178	8.522	12.859	12.51	10.171	10.339	9.537	9.28
4.66667	280	7.676	7.031	8.12	8.814	9.822	10.473	10.129	9.155	8.192	7.135	6.6	7.643	7.6	7.706	7.741	8.327	9.637	9.924	13.398	13.616	14.229	10.49	10.457	9.573	7.376	7.255	7.971	8.016	8.067	8.084	12.051	12.614	12.263	10.384	9.359	8.308	8.002	7.971	9.273	8.584	8.702	9.094	13.875	14.008	11.396	11.769	10.598	10.176
5	300	7.806	7.067	8.286	9.214	10.161	10.788	10.424	9.4	8.494	7.41	6.786	7.788	7.669	7.851	7.71	8.731	10.01	10.069	13.912	14.175	14.827	11.461	11.427	10.235	7.541	7.327	8.069	8.19	8.202	8.296	12.431	13.122	12.896	11.075	10.296	8.661	8.525	8.263	9.706	8.971	9.165	9.614	14.871	15.388	13.124	13.049	11.759	11.229
5.33333	320	7.694	6.861	7.959	8.408	9.427	10.261	10.253	9.208	8.263	7.171	6.639	7.724	7.422	7.492	7.375	8.035	9.169	9.569	14.371	14.798	15.431	12.527	12.884	11.365	7.304	7.143	7.902	7.863	7.971	7.939	12.651	13.567	13.449	12.041	11.441	9.561	8.686	8.48	9.769	9.033	9.131	9.673	15.553	16.41	15.304	15.247	13.816	12.535
5.66667	340	7.745	7.118	8.504	9.145	9.929	10.316	10.073	9.073	7.951	7.027	6.375	7.649	7.484	7.739	8.01	8.437	9.375	9.641	15.345	15.437	15.941	13.427	14.224	13.067	7.478	7.494	8.031	8.094	8.192	8.137	13.178	13.988	13.861	13.002	12.706	10.724	9.373	9.01	10.565	10.057	9.853	9.965	16.357	17.384	16.386	17.282	16.42	15.429
6	360	7.749	6.967	7.91	8.62	9.571	10.265	10.314	9.382	8.29	7.094	6.527	7.79	7.39	7.484	7.575	8.131	9.173	9.533	16.122	16.216	17.069	14.314	15.451	15.004	7.284	7.261	7.967	7.992	8.108	8.076	13.629	14.467	14.378	13.8	13.8	12.576	9.831	9.435	11.053	10.386	10.337	10.435	17.331	18.567	17.631	18.278	18.578	19.29
6.33333	380	7.68	6.802	7.773	8.384	9.48	10.182	11.055	10.137	9.278	7.751	7.112	8.21	7.673	7.486	7.486	7.994	9.284	9.561	17.265	17.367	18.092	14.792	16.114	16.561	7.353	7.171	7.871	7.822	7.998	8.051	14.335	15.229	15.006	14.408	14.308	13.786	10.565	10.216	12.059	10.802	10.902	11.01	18.48	19.796	18.669	19.549	20.053	20.831
6.66667	400	7.827	7.204	8.563	9.435	10.255	10.649	11.322	10.029	9.171	7.547	6.875	8.063	7.765	7.865	7.904	8.773	9.873	9.92	18.371	18.412	19.208	15.418	16.753	17.424	7.598	7.48	8.153	8.282	8.284	8.263	15.037	15.792	15.696	14.969	14.873	14.72	11.829	12.033	13.618	11.867	11.861	11.918	19.663	20.937	19.778	20.529	20.89	21.712
7	420	7.753	6.833	7.749	8.471	9.62	10.461	12.38	10.81	9.802	7.798	7.157	8.355	7.716	7.561	7.518	8.198	9.378	9.645	19.592	19.641	20.414	16.147	17.484	18.153	7.406	7.176	7.914	7.971	8.02	8.11	15.796	16.673	16.502	15.431	15.539	15.261	13.906	13.333	15.19	13.284	13.682	14.237	21.106	22.286	20.929	21.622	21.959	22.686
7.33333	440	7.778	7.098	8.224	9.006	9.869	10.4	13.457	11.286	9.584	7.627	6.931	8.208	7.663	7.778	8.086	8.606	9.571	9.735	20.906	20.878	21.694	16.886	18.249	18.982	7.567	7.512	8.037	8.214	8.2	8.198	16.624	17.261	17.265	16.025	15.976	15.922	16.425	14.655	16.273	15.669	15.543	15.235	22.52	23.743	22.571	22.753	23.084	23.99
7.66667	460	7.747	6.927	7.908	8.627	9.637	10.388	14.522	12.753	10.129	7.79	7.102	8.278	7.676	7.671	7.665	8.245	9.349	9.663	22.275	22.165	22.78	17.945	19.325	20.32	7.412	7.249	7.957	8.045	8.163	8.11	17.692	18.522	18.343	16.88	16.816	16.71	18.312	15.796	17.347	16.857	16.763	16.241	24.206	25.545	24.027	24.392	24.641	25.602
8	480	7.69	6.963	7.924	8.667	9.582	10.331	15.159	14.086	11.086	7.704	7.108	8.351	7.614	7.653	7.737	8.475	9.373	9.682	23.702	23.584	24.143	19.18	20.378	21.341	7.41	7.353	8.071	8.039	8.178	8.129	18.722	19.412	19.22	17.635	17.547	17.412	20.11	16.933	18.467	17.916	17.939	17.627	25.992	27.261	26.178	25.816	26.245	27.324
8.33333	500	7.871	6.943	7.804	8.408	9.275	10.139	15.659	14.961	13.265	8.337	7.68	8.837	7.786	7.633	7.671	8.306	9.247	9.616	24.918	24.843	25.524	20.398	21.629	22.645	7.467	7.273	7.984	7.933	8.055	8.161	19.675	20.373	20.339	18.476	18.588	18.363	21.68	18.149	19.688	19.318	19.131	18.743	28.2	29.308	28.033	27.329	27.525	29.024
8.66667	520	7.855	7.018	8.225	8.92	9.69	10.157	15.796	15.637	14.955	8.147	7.478	8.649	7.824	7.857	8.1	8.731	9.478	9.682	26.406	26.057	26.741	21.459	22.816	23.661	7.616	7.449	8.114	8.171	8.212	8.204	20.576	21.057	21.131	19.078	19.42	19.239	23.196	19.306	21.102	20.378	20.259	20.18	30.31	31.663	30.039	28.459	28.81	30.178
9	540	7.822	7.078	8.196	8.824	9.612	10.267	16.259	15.951	15.916	8.506	7.904	9.051	7.873	7.914	8.173	8.786	9.508	9.667	27.761	27.259	27.769	22.859	23.969	24.986	7.608	7.498	8.096	8.137	8.218	8.365	21.588	20.892	22.31	20.116	20.237	20.494	25.024	20.884	22.602	21.904	21.722	21.58	32.555	33.835	32.5	29.269	29.816	31.331
9.33333	560	7.827	6.922	7.973	8.955	9.849	10.265	17.106	16.647	16.314	8.271	7.62	8.841	7.855	7.802	8.28	8.759	9.543	9.557	29.171	29.09	29.814	24.243	25.375	26.724	7.463	7.502	8.067	8.206	8.259	8.204	22.969	20.561	23.402	21.376	21.457	21.547	27.131	22.731	24.314	23.494	23.396	23.239	35.508	36.51	35.253	30.378	31.01	32.612
9.66667	580	7.822	7.012	8.049	8.792	9.533	10.214	17.688	17.149	16.678	8.653	7.953	9.096	7.902	7.859	8.182	8.796	9.427	9.551	29.775	29.543	30.588	25.367	26.622	27.845	7.467	7.376	8.082	8.322	8.259	8.21	24.088	22.975	24.449	22.261	22.573	22.888	29.324	24.635	26.278	25.055	24.884	24.737	38.106	39.235	38.204	30.561	31.11	32.865
10	600	7.812	7.049	8.302	9.237	10.065	10.637	18.765	18.165	17.406	8.72	8.059	9.206	7.912	7.939	8.275	8.953	9.698	9.659	31.106	30.996	31.825	26.533	27.812	29.304	7.588	7.622	8.149	8.435	8.331	8.543	25.027	23.698	25.757	23.478	23.571	24.21	31.675	26.753	28.214	26.945	26.694	26.686	41.467	42.724	41.206	31.184	31.845	33.553
10.3333	620	7.924	7.088	8.312	9.184	10.076	10.612	19.286	18.961	18.198	9.049	8.4	9.482	8.053	7.935	8.131	9.125	9.759	9.602	28.769	28.418	29.406	27.776	29.012	30.278	7.635	7.557	8.061	8.392	8.378	8.684	26.384	24.345	26.68	24.384	24.584	25.192	34.541	29.084	30.625	29.037	28.786	28.808	44.424	45.555	44.469	31.886	32.296	34.069
10.6667	640	7.853	7.2	8.637	9.357	10	10.163	20.067	19.676	18.649	9.163	8.5	9.622	8.069	8.265	8.463	9.29	9.661	9.555	30.361	29.753	30.776	29.151	30.053	31.661	7.665	7.667	8.151	8.553	8.416	8.429	27.692	25.116	27.89	25.698	25.82	26.453	37.084	31.698	33.137	31.043	30.792	30.773	47.961	48.963	48.351	32.435	33.002	34.559
11	660	7.896	7.025	8.406	9.21	9.953	10.257	21.045	20.684	19.661	9.776	9.257	10.327	8.171	8.11	8.214	9.078	9.684	9.649	31.951	31.773	32.796	30.084	31.222	32.582	7.627	7.625	8.049	8.441	8.404	8.596	28.763	26.063	28.971	26.478	26.643	27.575	40.069	33.975	35.478	33.171	32.933	32.998	51.5	52.82	51.649	32.892	33.649	35.471
11.3333	680	8.012	7.122	8.569	9.457	9.99	10.42	21.973	21.702	20.412	9.567	9.084	10.227	8.345	8.337	8.488	9.32	9.725	9.602	34.096	33.898	34.943	31.082	31.953	33.278	7.775	7.753	8.171	8.465	8.29	8.584	29.359	26.61	29.898	27.584	27.865	28.629	43.398	36.806	38.516	35.629	35.178	35.367	55.551	56.688	55.475	33.414	34.175	35.912
11.6667	700	7.925	7.214	8.475	9.6	10.271	10.7	23.182	22.8	21.553	10.208	9.384	10.633	8.239	8.39	8.396	9.327	9.802	9.647	36.067	35.765	36.973	31.957	33.016	33.839	7.79	7.751	8.276	8.594	8.527	8.837	30.459	27.175	30.988	28.731	29.047	29.941	46.918	40.245	41.722	38.275	37.988	38.1	59.676	61.022	59.918	34.324	35.108	36.912
12	720	7.884	7.176	8.586	9.318	10.159	10.284	24.337	23.924	22.406	10.404	9.565	10.888	8.202	8.457	8.451	9.367	9.69	9.69	38.492	38.098	39.369	32.155	32.945	34.51	7.722	7.724	8.214	8.535	8.488	8.686	31.127	28.571	31.433	29.755	30.353	31.159	50.694	43.612	45.155	40.992	40.382	40.629	64.81	66.08	64.614	35.267	35.931	37.68
12.3333	740	7.906	7.098	8.255	9.145	9.704	10.157	25.416	25.016	23.512	10.692	9.912	11.353	8.306	8.435	8.302	9.275	9.586	9.827	40.651	40.353	41.582	32.957	33.776	35.355	7.567	7.606	8.22	8.467	8.255	8.439	29.863	29.778	30.722	30.757	31.494	32.529	55.1	47.067	48.337	43.367	43.076	43.425	69.455	71.257	70.094	36.143	36.731	38.449
12.6667	760	7.884	6.969	8.133	8.906	9.665	10.08	26.733	26.322	24.498	11.353	10.404	11.759	8.235	8.206	8.208	9.286	9.582	9.945	43.167	42.594	43.873	33.72	34.373	35.918	7.58	7.561	8.141	8.408	8.337	8.418	32.241	31.751	32.596	31.835	32.127	33.078	59.435	51.129	52.647	46.516	46.118	46.282	74.098	75.896	74.516	36.488	37.367	39.631
13	780	7.876	7.031	8.143	9.057	9.927	10.533	28.369	27.867	25.894	12.227	10.91	12.22	8.22	8.229	8.184	9.331	9.702	10.475	45.09	44.945	45.922	34.333	35.065	36.653	7.692	7.62	8.239	8.439	8.376	8.669	34.196	33.755	34.484	32.69	32.857	34.004	62.847	54.204	55.776	49.494	48.876	49.043	77.965	79.765	78.665	36.663	37.596	40.516
13.3333	800	7.835	7.073	8.347	9.233	10.067	10.514	29.937	29.341	27.247	12.925	11.284	12.8	8.302	8.492	8.435	9.52	9.775	10.661	47.565	47.288	48.288	33.847	34.473	36.463	7.808	7.682	8.243	8.578	8.604	8.708	36.376	35.878	36.563	33.647	33.857	34.702	67.78	58.265	59.645	52.367	51.865	52.237	81.21	83.19	82.09	37.333	38.031	39.865
13.6667	820	7.873	7.149	8.476	9.441	10.139	10.533	31.225	30.592	28.351	13.563	12.029	13.308	8.502	8.522	8.378	9.5	9.82	10.724	49.855	49.478	50.586	33.902	34.967	36.808	7.802	7.686	8.318	8.761	8.59	8.773	38.394	37.496	38.435	33.024	33.086	34.765	73.037	62.657	64.08	55.776	54.961	55.206	83.851	85.876	84.343	38.529	39.233	40.941
14	840	7.91	7.135	8.451	9.318	9.792	10.178	32.806	32.067	29.941	14.078	12.665	14.053	8.478	8.841	8.484	9.555	9.745	10.827	52.298	52.053	53.029	34.763	35.814	37.576	7.72	7.806	8.284	8.667	8.435	8.673	40.012	39.88	40.49	33.757	34.229	36.047	78.198	67.478	68.667	58.912	58.243	58.645	85.31	87.506	86.198	39.837	40.447	42.259
14.3333	860	7.824	7.151	8.484	9.327	9.753	10.11	34.08	33.284	31.157	14.5	13.335	14.912	8.549	8.878	8.618	9.637	9.722	11.025	54.975	54.376	55.424	34.68	35.829	38.282	7.782	7.796	8.355	8.624	8.569	8.778	42.624	42.033	42.584	34.975	35.441	37.447	83.61	71.988	73.18	62.367	61.649	62.149	86.72	88.808	87.284	41.339	42.006	43.892
14.6667	880	7.927	7.131	8.353	9.125	9.939	10.524	35.884	35.09	32.173	14.969	13.671	15.416	8.616	8.682	8.42	9.833	10.19	10.996	57.357	56.49	57.559	36.124	37.01	38.749	7.857	7.761	8.327	8.624	8.657	8.89	44.478	44.235	44.624	35.939	36.675	38.79	88.141	76.088	77.449	65.78	64.804	65.286	87.404	89.606	88.069	42.824	43.537	45.267
15	900	7.871	6.971	8.106	9.022	9.667	9.965	37.704	36.941	34.01	15.273	14.371	16.051	8.478	8.386	8.271	9.657	10.398	10.978	59.606	58.871	59.818	36.982	37.727	38.733	7.622	7.578	8.296	8.543	8.429	8.649	46.688	46.029	46.951	37.225	37.773	39.857	91.925	79.665	81.176	69.261	68.229	68.655	87.714	90.037	88.72	44.616	45.353	47.118
15.3333	920	7.876	6.963	7.89	8.739	9.571	10.192	39.749	38.976	36.049	15.367	14.867	16.686	8.449	8.3	8.245	9.767	10.594	11.006	62.11	61.914	62.678	38.125	38.739	39.671	7.567	7.531	8.331	8.614	8.573	8.747	49.329	48.71	49.188	38.192	38.841	40.949	95.445	82.782	84.355	73.116	72.163	72.355	88.022	90.5	88.629	46.382	46.906	48.806
15.6667	940	7.851	7.078	8.224	9.214	9.633	10.063	41.616	40.875	37.851	15.708	14.957	17.008	8.567	8.816	8.541	9.827	10.835	10.963	64.082	63.62	64.704	38.863	39.61	40.275	7.59	7.7	8.349	8.829	8.586	8.657	51.394	50.535	51.469	39.19	39.843	41.843	97.267	84.759	86.324	75.871	74.861	75.337	88.245	90.529	88.667	46.559	47.32	49.288
16	960	7.88	7.198	8.533	9.508	10.227	10.573	43.618	42.559	39.778	16.125	15.329	17.349	8.592	8.635	8.647	10.276	10.922	11.008	66.833	66.171	67.008	39.986	40.633	41.296	7.918	7.757	8.461	8.98	8.884	8.947	53.5	52.751	53.294	40.047	40.939	43.098	99.649	86.976	88.427	78.935	77.939	78.212	88.408	90.927	88.847	47.096	47.969	49.724
16.3333	980	7.906	6.931	8.137	8.984	9.578	9.949	45.592	44.675	41.775	16.271	15.6	17.792	8.684	8.592	8.512	10.627	10.914	11.065	68.584	68.02	69.161	40.502	41.039	42.331	7.755	7.743	8.492	8.886	8.712	8.802	55.857	55.122	55.924	41.237	41.702	43.761	101.233	88.318	89.886	81.073	80.298	80.571	88.673	90.884	89.014	47.349	48.092	49.916
16.6667	1000	7.892	6.984	8.027	9.002	9.559	10.118	47.737	46.847	43.71	16.525	16.059	18.047	8.641	8.724	8.504	10.739	10.965	10.947	70.68	70.088	71.069	41.753	42.231	43.263	7.663	7.616	8.41	8.831	8.576	8.727	58.259	56.476	57.865	42.165	42.635	43.041	102.402	89.367	91.127	82.769	82.024	82.38	88.645	90.91	89.076	47.527	48.28	50.127
17	1020	7.806	7.008	8.239	9.153	9.818	10.147	49.808	48.79	45.645	17.069	16.253	18.641	8.78	8.665	8.649	10.757	10.965	11.025	72.551	72.071	73.188	42.665	43.249	44.588	7.896	7.825	8.482	9.09	8.79	8.871	60.314	58.947	59.839	42.855	44.316	44.82	103.439	90.512	92.294	84.257	83.314	83.82	89.025	91.308	89.212	47.504	48.369	50.253
17.3333	1040	7.894	7.08	8.484	9.392	10.104	10.524	51.796	50.722	47.735	17.429	16.655	19.09	8.765	8.596	8.545	10.927	10.963	11.024	74.396	74.09	75.02	43.943	44.345	45.78	7.992	7.861	8.525	9.082	8.92	9.1	63.002	61.52	62.494	43.965	45.4	47.151	104.729	91.716	93.245	85.637	84.62	84.673	89.363	91.767	89.553	47.833	48.537	50.233
17.6667	1060	7.933	7.041	8.233	9.22	9.763	9.992	54.039	52.986	49.684	17.576	17.131	19.469	8.922	8.939	8.655	10.861	10.98	10.992	76.141	75.535	76.396	45.096	45.533	46.996	7.898	7.867	8.508	9.206	8.743	8.867	65.175	64.033	64.906	45.025	46.024	46.945	105.282	92.286	93.837	86.016	85.373	85.729	89.896	92.053	89.845	47.873	48.478	50.276
18	1080	7.91	7.049	8.257	9.196	10.014	10.659	56.169	55.147	51.963	18.178	17.494	19.861	9.084	8.659	8.778	10.943	10.98	10.945	77.378	77.067	77.982	46.035	45.192	46.773	8.061	7.927	8.631	9.235	9.192	9.235	67.612	66.847	67.516	46.48	47.131	48.973	106.175	93.018	94.624	86.751	85.902	86.155	90.459	92.367	90.355	47.831	48.478	50.133
18.3333	1100	7.914	6.953	8.124	9.202	9.996	10.737	58.467	57.188	54.024	18.627	17.837	20.255	9.086	8.612	8.729	11.004	10.88	10.945	78.669	77.99	79.376	46.594	45.72	47.082	8.055	7.833	8.573	9.286	9.016	9.12	69.643	69.478	69.337	47.608	48.198	50.104	106.686	93.4	95.42	87.331	86.7	86.749	90.688	92.973	90.469	47.812	48.504	50.292
18.6667	1120	7.908	7.202	8.537	9.576	9.986	10.647	60.314	59.324	55.918	18.933	18.247	20.724	9.325	9.102	8.924	10.986	10.963	10.963	79.255	78.904	80.28	46.053	46.48	47.651	8.127	8.014	8.641	9.473	8.961	9.206	72.094	71.831	72.049	48.439	48.831	48.278	107.206	93.912	95.669	87.884	86.914	87.245	90.906	93.216	90.849	47.918	48.425	50.331
19.3333	1160	7.884	6.982	8.073	8.902	9.7	10.384	64.871	63.702	60.469	20.141	19.343	22.002	9.547	8.863	8.931	11.071	11.006	10.976	81.09	80.671	82.198	46.641	46.731	46.898	8.143	7.927	8.616	9.322	9.012	9.178	76.402	76.09	76.504	48.249	49.582	48.131	108.122	94.68	96.533	89.141	88.288	88.59	91.753	94.227	91.822	47.869	48.461	50.371
19.6667	1180	7.904	6.943	8.027	8.869	9.531	10.298	67.261	65.865	62.792	20.578	19.749	22.492	9.778	8.976	8.976	11.014	10.965	11.049	82.069	81.443	82.986	46.335	46.261	48.204	8.169	7.998	8.716	9.459	9.157	9.198	78.722	78.363	78.663	49.129	49.337	48.275	108.565	95.12	96.829	89.555	89.051	89.084	92.225	94.596	92.363	47.806	48.618	50.106
20	1200	7.931	7.11	8.257	9.184	9.753	10.12	69.52	68.343	64.994	21.018	20.255	23.02	9.971	9.316	9.108	11.029	10.902	10.9	82.812	82.229	83.953	46.533	46.488	48.09	8.182	8.192	8.716	9.592	9.094	9.161	81.188	80.841	80.886	48.51	49.531	48.343	109.09	95.512	97.12	90.32	89.578	89.841	92.794	95.073	92.567	47.924	48.427	50.261
20.3333	1220	7.971	7.131	8.51	9.461	9.739	10.086	71.745	70.571	67.351	21.484	20.776	23.68	10.48	9.402	9.19	10.959	10.88	10.959	83.443	82.829	84.498	46.306	44.892	48.088	8.251	8.259	8.786	9.714	9.184	9.269	82.786	82.59	82.651	48.796	48.953	47.961	109.306	96.027	97.451	90.71	89.908	90.163	93.065	95.365	92.741	47.992	48.547	50.288
21	1260	8.027	7.271	8.575	9.539	9.82	10.227	76.431	75.133	71.676	22.871	22.076	25.129	10.753	9.665	9.453	10.951	10.943	10.969	84.618	83.937	85.547	46.314	44.327	47.898	8.447	8.529	8.929	9.829	9.282	9.496	86.149	85.688	85.655	46.545	46.978	47.865	110.016	96.412	98.19	91.951	91.361	91.365	93.712	96.233	93.447	48.006	48.284	50.114
21.3333	1280	7.849	7.08	8.229	9.214	9.918	10.504	78.908	77.341	74.104	23.827	22.625	25.975	11.088	9.582	9.588	11.018	10.922	10.88	85.38	84.773	86.435	45.98	44.416	47.929	8.435	8.32	8.98	9.78	9.404	9.531	87.404	87.067	87.202	46.343	46.555	47.624	110.28	96.976	98.51	92.706	91.627	91.837	93.867	96.441	93.794	47.9	48.345	50.255
21.6667	1300	7.945	7.318	8.669	9.704	10.012	10.71	81.078	79.533	76.384	24.5	23.394	26.569	11.388	9.714	9.647	11	10.969	10.929	85.631	84.924	86.751	46.106	45.251	47.969	8.529	8.665	9.055	10.039	9.478	9.824	88.049	88.192	88.182	46.2	46.557	47.635	110.622	96.849	98.678	93.088	92.331	92.616	94.357	96.749	94.2	48.059	48.329	50.167
22	1320	7.839	7.284	8.498	9.725	10.206	10.635	83.308	81.751	78.596	25.225	24.173	27.465	11.551	9.931	9.68	10.976	10.953	10.902	86.429	85.722	86.992	46.167	45.396	47.994	8.584	8.639	9.11	10.153	9.602	10.137	89.133	89.384	89.008	46.278	46.457	47.776	110.922	96.914	98.78	93.302	92.492	93.076	94.606	97.114	94.339	48.022	48.239	50.251
22.3333	1340	7.829	7.014	8.184	9.176	9.916	10.737	85.371	83.847	80.841	26.286	25.045	28	11.849	9.733	10.016	10.924	10.873	10.925	86.796	86.088	87.786	46.586	44.771	47.573	8.596	8.48	9.012	10.006	9.702	10.52	89.812	90.18	89.892	46.32	46.494	47.863	111.231	97.445	99.031	93.925	92.869	93.367	94.943	97.633	94.963	48.129	48.316	50.106
22.6667	1360	8.02	7.42	8.778	9.845	10.061	10.282	87.012	85.257	82.824	27.11	25.645	28.686	12.196	9.859	10.147	11.073	11.002	10.99	86.79	86.557	88.092	45.965	45.604	47.735	8.816	8.731	9.106	10.294	9.661	10.59	90.353	91.027	90.506	46.165	46.339	47.788	111.324	97.549	99.375	94.378	93.373	93.525	95.418	97.873	95.239	48.063	48.39	50.006
23	1380	7.924	7.014	8.116	9.063	9.773	10.394	88.676	86.933	84.835	28.239	26.561	29.461	12.351	9.778	10.218	10.9	10.935	10.892	87.559	86.643	88.322	46.076	45.306	47.837	8.651	8.661	9.239	10.331	9.953	10.755	91.004	91.808	91.478	46.147	46.167	47.749	111.347	97.649	99.435	94.825	94.037	94.102	95.625	98.061	95.52	47.984	48.241	50.078
23.3333	1400	7.984	7.129	8.343	9.28	9.763	10.38	89.961	88.404	86.443	29.041	27.355	30.378	12.476	9.886	10.418	11.098	11.075	11.051	87.908	87.19	88.731	46.263	44.829	47.894	8.835	8.935	9.349	10.59	10.149	10.863	91.457	92.594	92.276	45.98	46.396	47.71	111.653	97.933	99.757	95.286	94.449	94.629	95.882	98.357	95.796	48.057	48.19	50.206
23.6667	1420	7.988	7.267	8.596	9.663	9.929	10.376	91.373	89.441	87.614	30.1	27.914	31.482	12.576	9.908	10.38	11.014	10.925	11.055	87.888	87.429	88.984	45.475	45.11	48.063	9.012	9.114	9.498	10.663	10.449	10.988	91.947	93.02	93.041	46.039	46.322	47.569	111.965	97.992	99.888	95.675	94.551	94.849	95.957	98.59	95.992	47.9	48.351	50.012
24	1440	8.012	7.447	8.873	10.02	10.137	10.598	92.461	90.696	88.973	31.224	28.9	32.588	12.606	9.982	10.384	11.031	11.01	11.076	88.339	87.555	89.602	45.229	44.657	47.516	9.192	9.408	9.847	10.788	10.624	11.053	92.737	93.737	93.741	46.267	46.361	47.58	112.141	98.02	100	95.998	95.065	95.382	96.555	98.92	96.525	47.998	48.161	49.978
24.3333	1460	7.875	7.035	8.078	9.049	9.567	10.308	93.447	91.52	89.935	32.71	29.986	34.067	12.616	9.924	10.4	10.949	10.91	10.937	88.608	87.788	89.418	44.892	44.451	47.645	9.214	9.427	9.855	11.153	10.741	11.08	93.137	93.892	93.465	46.084	46.31	47.5	112.357	98.269	100.025	96.435	95.61	95.629	96.71	99.055	96.692	48.114	48.139	50.063
24.6667	1480	7.973	7.276	8.678	9.767	10.031	10.445	94.327	92.612	90.937	33.588	31.004	35.063	12.567	10.227	10.441	10.892	10.973	11.018	88.837	88.157	89.873	45.669	43.986	47.388	9.549	9.704	10.071	11.459	10.837	11.096	93.351	94.727	93.851	46.065	46.076	47.451	112.284	98.549	100.09	96.992	95.739	96.088	96.951	99.341	96.724	47.782	48.075	49.906
25	1500	7.933	7.055	8.118	9.108	9.682	10.339	95.124	93.418	92.082	35.5	32.555	36.988	12.69	10.325	10.473	10.955	10.937	10.951	89.245	88.386	90.102	45.814	44.227	46.994	9.682	9.741	10.361	11.927	10.937	11.182	93.804	94.814	94.29	46.114	46.243	47.506	112.482	98.535	100.524	97.259	96.331	96.592	97.355	99.571	97.008	48.057	48.061	49.971
25.3333	1520	7.986	7.075	8.212	9.265	9.8	10.478	96.271	94.227	92.961	37.196	34.214	38.48	12.714	10.516	10.475	10.943	10.871	10.949	89.565	88.867	90.602	46.016	44.175	45.959	9.992	10.057	10.604	12.122	10.914	11.278	94.547	95.592	94.433	45.998	46.204	47.684	112.775	98.765	100.308	97.447	96.684	96.961	97.471	99.839	97.347	48.049	48.208	49.955
25.6667	1540	8.037	7.312	8.673	9.69	10.157	10.859	96.827	95.016	93.865	38.755	35.557	39.89	12.761	10.765	10.582	10.986	11.024	11.012	89.635	88.943	90.757	44.78	43.806	46.151	10.3	10.288	10.778	12.231	11.086	11.259	94.89	95.669	94.749	46.037	46.031	47.545	112.869	98.947	100.622	98.104	97.108	97.512	97.904	100.275	97.384	47.951	48.086	49.849
26	1560	7.992	7.133	8.296	9.357	9.906	10.573	97.49	95.643	94.404	40.724	37.178	41.827	12.851	10.841	10.731	10.951	11.059	11.414	90.039	89.024	90.994	43.708	43.929	45.912	10.437	10.443	10.833	12.257	11.127	11.38	95.024	96.094	94.965	46.01	46.163	47.433	112.994	99.216	100.814	98.461	97.5	97.88	97.78	100.222	97.722	48.125	48.104	50.006
26.3333	1580	8.116	7.322	8.625	9.7	9.827	10.296	98.08	96.041	95.08	42.363	38.845	43.294	12.81	11.086	10.757	10.986	11.051	11.376	90.376	89.324	90.833	43.937	43.769	46.106	10.675	10.5	11	12.322	11.19	11.394	95.476	96.871	95.184	46.065	46.047	47.271	113.069	99.259	100.973	98.649	97.949	97.798	97.841	100.476	97.914	48.114	48	49.971
26.6667	1600	8.167	7.296	8.518	9.575	9.684	10.239	98.596	96.629	95.859	44.043	40.388	44.894	12.761	11.035	10.9	11.031	10.912	11.392	90.38	89.52	90.965	43.843	43.694	45.231	10.851	10.718	11.082	12.396	11.157	11.335	95.771	96.68	95.118	45.9	46.092	47.414	113.349	99.227	100.955	98.873	98.231	98.398	98.257	100.643	98.214	48.053	47.922	49.698
27	1620	8.071	7.198	8.465	9.404	9.959	10.537	99.194	97.394	96.218	45.955	42.394	46.814	12.808	11.3	10.955	11.01	10.937	11.343	90.531	89.673	90.878	43.6	43.765	45.359	11.173	10.898	11.214	12.443	11.218	11.473	96.202	97.233	95.522	45.99	45.963	47.41	113.598	99.459	101.069	99.412	98.588	98.741	98.425	100.99	98.359	47.845	47.933	49.875
27.3333	1640	8.196	7.286	8.531	9.62	9.831	10.408	99.518	97.867	96.894	47.882	44.159	48.659	12.91	11.531	10.888	11.071	11.069	11.392	90.549	89.739	90.733	43.335	43.886	45.331	11.429	11.031	11.408	12.469	11.324	11.533	96.324	97.267	95.49	45.931	46.086	47.408	113.437	99.541	101.322	99.543	98.747	99.045	98.418	101.108	98.376	47.916	47.81	49.733
27.6667	1660	8.045	7.422	8.857	10.063	10.292	10.745	100.147	98.214	97.38	49.171	45.9	49.575	12.92	11.665	10.847	11.075	11.118	11.408	90.808	90.102	90.861	43.31	43.727	45.147	11.612	11.163	11.514	12.529	11.369	11.665	96.694	97.757	96.116	45.833	45.967	47.341	113.443	99.624	101.2	100.186	99.225	99.357	98.937	101.418	98.563	48.043	47.792	49.718
28	1680	8.104	7.541	8.978	10.159	10.173	10.602	100.496	98.671	97.825	49.82	46.335	50.439	12.959	11.725	10.91	11.092	11.135	11.476	90.622	89.904	91.102	43.267	43.633	45.022	11.727	11.245	11.686	12.592	11.355	11.675	96.9	98.147	96.357	45.79	45.902	47.324	113.794	99.827	101.604	100.084	99.318	99.439	98.843	101.649	98.847	47.863	47.824	49.586
28.3333	1700	8.11	7.247	8.459	9.459	9.847	10.267	100.708	98.835	98.145	50.657	47.382	51.104	12.904	11.753	10.833	11.104	11.102	11.382	90.882	90.025	90.741	43.196	43.58	44.898	11.988	11.404	11.7	12.673	11.394	11.667	97.186	98.157	96.482	45.845	45.825	47.208	113.767	99.739	101.465	100.378	99.49	99.6	99.155	101.475	99.047	47.884	47.896	49.414
28.6667	1720	8.2	7.606	8.92	10.063	10.155	10.586	101.192	99.292	98.314	51.027	47.941	51.592	12.99	11.829	10.763	11.012	11.016	11.316	90.933	90.269	91.341	43.094	43.384	44.639	12.124	11.486	11.761	12.733	11.412	11.731	97.437	98.512	96.718	45.716	45.643	47.1	113.912	99.788	101.61	100.753	99.769	100.014	99.38	101.908	99.229	47.929	47.818	49.594
29	1740	8.096	7.492	8.951	10.035	10.133	10.749	101.475	99.731	99.098	51.512	48.576	52.139	12.98	11.82	10.927	10.955	11.055	11.337	90.882	90.035	91.522	43.235	43.453	44.653	12.188	11.661	11.81	12.739	11.443	11.771	97.643	98.712	97.1	45.612	45.843	47.141	113.99	99.967	101.667	100.724	99.884	99.982	99.575	101.969	99.32	47.937	47.78	49.594
29.3333	1760	8.094	7.124	8.355	9.386	9.92	10.39	101.735	99.837	99.306	51.878	48.918	52.553	12.912	11.951	10.724	11.057	11.012	11.292	91.229	90.278	91.173	43.188	43.49	44.557	12.39	11.549	11.802	12.743	11.467	11.765	97.998	98.706	97.237	45.543	45.633	47.104	114.022	100.133	101.72	101.047	99.982	100.408	99.614	102.206	99.276	47.922	47.655	49.435
29.6667	1780	8.157	7.522	8.945	10.08	10.016	10.496	102.088	100.129	99.51	52.073	49.227	52.539	12.982	11.937	10.776	11.018	11.018	11.339	91.012	90.408	90.971	43.122	43.292	44.606	12.535	11.692	11.816	12.851	11.702	11.812	97.786	99.018	97.441	45.631	45.737	46.929	114.302	99.978	101.771	101.018	100.147	100.382	99.684	102.241	99.565	47.71	47.684	49.539
30	1800	8.122	7.229	8.38	9.376	9.947	10.584	102.488	100.514	99.949	52.351	49.553	52.89	13.076	12.071	10.875	11.135	11.147	11.404	91.522	90.641	91.608	43.182	43.451	44.757	12.729	11.833	11.988	13.018	11.778	11.959	98.396	99.486	97.494	45.657	45.557	47.078	114.451	100.084	102.063	101.435	100.582	100.765	99.947	102.392	99.678	47.886	47.708	49.457
30.3333	1820	8.078	7.198	8.269	9.331	9.943	10.476	102.661	100.712	100.139	52.38	49.606	53.182	13.047	11.949	10.843	11.008	11	11.416	91.4	90.329	91.465	43.296	43.465	44.647	12.814	11.867	11.967	13.147	11.745	12.11	98.337	99.28	97.69	45.631	45.473	46.859	114.506	100.439	102.153	101.592	100.563	100.72	99.984	102.465	99.876	47.978	47.614	49.504
30.6667	1840	8.006	7.145	8.312	9.408	9.878	10.657	102.627	100.82	100.576	52.688	49.7	53.067	12.945	12.006	10.767	11.004	11.004	11.376	91.504	90.676	91.52	43.184	43.349	44.516	12.869	11.841	12.112	13.084	11.753	12	98.761	99.484	97.745	45.465	45.504	46.943	114.575	100.288	102.198	101.539	100.757	101.108	100.267	102.578	100.004	47.78	47.557	49.502
31	1860	8.159	7.443	8.769	9.784	9.922	10.647	102.833	101.204	100.635	52.767	49.816	53.176	13.039	12.008	10.775	11.045	11.116	11.316	91.694	91.006	91.757	43.073	43.28	44.51	13	11.99	12.114	13.237	11.908	12.182	98.704	99.976	98.073	45.592	45.588	46.937	114.52	100.414	102.38	101.88	100.88	101.278	100.476	102.888	100.284	47.955	47.725	49.549
31.3333	1880	8.278	7.369	8.543	9.753	9.8	10.361	103.512	101.512	101.053	53.09	49.963	53.402	13.116	11.969	10.804	11.041	11.041	11.324	91.637	90.776	91.865	43.18	43.382	44.463	13.155	11.965	12.212	13.265	12.025	12.143	98.822	99.81	98	45.525	45.518	46.876	114.745	100.522	102.437	102.163	101.088	101.443	100.473	103.002	100.261	47.902	47.622	49.484
31.6667	1900	8.129	7.29	8.524	9.757	10.257	10.902	103.784	101.725	101.353	53.088	50.082	53.445	13.102	12.024	10.839	11.063	11.084	11.275	91.845	91.235	91.976	43.204	43.263	44.404	13.151	12.09	12.261	13.443	12.147	12.427	98.89	99.929	98.467	45.663	45.696	46.937	114.833	100.673	102.469	102.29	101.41	101.633	100.729	103.292	100.5	47.914	47.539	49.404
32	1920	8.243	7.231	8.255	9.416	9.843	10.604	103.675	101.906	101.325	53.124	50.112	53.549	13.133	12.167	10.89	11.082	11.133	11.41	91.555	90.786	91.647	43.322	43.371	44.476	13.208	12.259	12.331	13.465	12.249	12.498	98.804	100	98.051	45.459	45.547	46.739	114.876	100.837	102.359	102.075	101.247	101.749	100.92	103.165	100.473	47.855	47.624	49.347
32.3333	1940	8.202	7.637	8.971	10.051	10.253	10.833	104.041	102.276	101.518	53.316	50.137	53.651	13.175	12.088	10.961	11.082	11.071	11.386	91.835	90.92	92.167	43.131	43.214	44.418	13.265	12.235	12.388	13.58	12.294	12.471	99.098	99.976	98.586	45.684	45.492	46.725	114.896	100.796	102.469	102.527	101.273	101.906	100.814	103.453	100.659	47.924	47.547	49.324
32.6667	1960	8.373	7.543	8.712	9.959	9.947	10.492	104.322	102.106	101.824	53.124	50.269	53.494	13.159	12.192	10.953	11.137	11.176	11.425	91.755	90.9	91.924	43.316	43.276	44.427	13.431	12.312	12.486	13.576	12.331	12.624	98.961	100.043	98.476	45.361	45.353	46.743	115.09	100.782	102.665	102.375	101.5	101.973	100.967	103.435	100.633	47.843	47.467	49.296
33	1980	8.096	7.49	8.904	10.1	10.114	10.778	104.449	102.371	102.01	53.259	49.994	53.416	13.029	12.039	10.788	11.018	11.082	11.316	92.078	91.027	92.653	43.063	43.073	44.222	13.339	12.318	12.533	13.775	12.529	12.684	99.396	100.255	98.537	45.359	45.343	46.659	115.28	101.067	102.551	102.678	101.716	102.147	100.939	103.408	100.798	47.89	47.459	49.259
33.3333	2000	8.096	7.363	8.769	9.916	10.1	10.818	104.588	102.637	102.112	53.286	50.153	53.484	13.045	11.984	10.796	10.996	11.086	11.294	92.278	91.245	92.51	43.01	43.12	44.184	13.524	12.429	12.6	13.933	12.594	12.847	99.159	100.375	98.614	45.257	45.09	46.539	115.251	100.959	102.841	103.041	101.859	102.202	101.051	103.824	101.049	47.794	47.588	49.114
33.6667	2020	8.327	7.375	8.543	9.741	9.896	10.649	104.592	102.716	102.247	53.353	50.224	53.58	13.11	12.071	10.892	11.063	11.125	11.353	92.333	91.327	92.651	43.186	43.161	44.269	13.62	12.476	12.745	14.033	12.639	12.778	99.341	100.655	98.645	45.518	45.302	46.761	115.049	100.969	102.788	102.98	101.822	102.308	101.229	103.496	100.773	47.998	47.453	49.253
34	2040	8.243	7.529	8.957	10.01	10.2	10.869	104.669	102.927	102.449	53.361	50.157	53.563	13.184	12.055	10.918	11.069	11.192	11.296	92.163	91.41	92.722	42.939	43.055	44.245	13.692	12.624	12.765	14.09	12.798	12.837	99.369	100.184	98.849	45.363	45.357	46.629	115.28	101.047	102.865	102.978	101.988	102.453	101.171	103.941	101.367	47.88	47.498	49.241
34.3333	2060	8.214	7.416	8.59	9.639	10.122	11.031	105.02	103.184	102.765	53.422	50.294	53.557	13.202	12.045	10.912	11.073	11.088	11.41	92.353	91.578	92.675	43.076	43.061	44.286	13.722	12.698	12.835	14.275	13.016	13.024	99.484	100.61	98.812	45.429	45.29	46.584	115.247	101.104	102.616	103.265	102.257	102.588	101.384	104.002	101.184	47.863	47.276	49.225
34.6667	2080	8.431	7.688	8.978	10.149	9.906	10.786	105.094	103.175	102.771	53.414	50.202	53.594	13.21	12.265	10.943	11.139	11.129	11.467	92.625	91.733	92.829	43.216	43.112	44.218	13.957	12.79	12.884	14.245	12.816	12.975	99.706	100.871	98.869	45.337	45.275	46.575	115.445	100.912	102.804	103.086	102.32	102.6	101.437	104	101.102	47.908	47.437	49.088
35	2100	8.261	7.616	9.025	10.049	10.151	10.969	105.318	103.178	102.778	53.32	50.025	53.6	13.271	12.124	10.965	11.108	11.159	11.398	92.488	91.653	92.904	42.967	43.039	44.131	13.922	12.818	12.975	14.469	13.096	13.21	99.578	100.884	98.963	45.384	45.341	46.594	115.331	101.002	103.139	103.296	102.278	102.629	101.749	103.912	101.369	47.749	47.294	48.986
35.3333	2120	8.539	7.761	8.857	10.165	9.904	10.765	105.425	103.573	103.159	53.341	49.992	53.494	13.324	12.155	11.008	11.133	11.194	11.361	92.818	91.647	92.706	43.102	43.163	44.112	14.163	12.986	13.096	14.545	13.076	13.143	99.614	100.78	98.951	45.227	45.325	46.576	115.467	101.29	102.759	103.661	102.382	102.812	101.641	104.033	101.539	47.849	47.243	49.239
35.6667	2140	8.349	7.4	8.522	9.625	9.867	10.973	105.604	103.722	103.327	53.535	50.173	53.461	13.273	12.151	11.033	11.116	11.178	11.42	92.9	91.935	93.157	42.892	42.904	44.133	14.094	13.002	13.314	14.576	13.155	12.92	99.716	100.841	99.38	45.125	45.122	46.569	115.49	101.449	103.196	103.604	102.722	103.02	101.794	104.361	101.631	47.965	47.441	49.106
36	2160	8.278	7.69	8.963	10.143	10.116	11.059	105.763	103.841	103.416	53.435	50.186	53.604	13.261	12.131	11.002	11.11	11.133	11.365	92.578	92.043	93.282	42.951	42.996	44.022	14.243	13.063	13.292	14.763	13.451	13.129	99.678	100.773	99.286	45.251	45.2	46.449	115.639	101.447	103.086	103.735	102.561	103.092	101.849	104.416	101.498	47.894	47.547	49.135
36.3333	2180	8.176	7.327	8.451	9.625	9.935	11.092	105.778	103.816	103.567	53.471	50.19	53.418	13.131	12.035	10.939	11.076	11.116	11.318	93.025	92.004	93.141	42.89	42.904	44.12	14.39	13.151	13.331	14.867	13.563	13.125	99.757	100.876	99.098	45.096	45.065	46.51	115.498	101.492	103.086	103.835	102.91	103.2	101.775	104.578	101.757	48.002	47.241	49.118
36.6667	2200	8.286	7.602	9.049	10.165	10.182	11.271	105.916	104.016	103.722	53.314	50.159	53.447	13.269	12.153	10.949	11.124	11.129	11.329	93.229	92.218	93.367	42.812	42.771	44.151	14.353	13.216	13.416	15.02	13.657	13.208	99.725	100.825	99.324	45.08	45.08	46.41	115.637	101.545	103.343	103.845	103.008	103.312	101.994	104.596	101.771	47.935	47.2	48.898
37	2220	8.208	7.437	8.645	9.859	10.041	11.276	106.039	103.896	103.829	53.369	50.137	53.345	13.163	12.08	10.953	11.049	11.125	11.359	93.28	92.337	93.345	42.937	42.945	43.935	14.471	13.218	13.429	15.075	13.412	13.104	99.91	100.971	99.2	44.978	44.878	46.241	115.835	101.655	103.349	103.914	102.898	103.057	101.89	104.418	101.973	47.994	47.171	48.992
37.3333	2240	8.2	7.473	8.831	10.031	10.12	11.439	106.008	104.269	103.849	53.404	50.043	53.512	13.308	12.235	10.978	11.106	11.233	11.382	93.482	92.612	93.371	42.998	43.057	44.216	14.502	13.373	13.518	15.208	13.524	13.278	100.098	101.547	99.043	45.133	45.082	46.527	115.567	101.502	103.043	103.645	102.824	103.447	102.037	104.702	101.906	48.104	47.204	49.088
37.6667	2260	8.441	7.753	9.031	10.169	9.951	11.184	106.345	104.308	104.061	53.337	49.982	53.349	13.229	12.165	11.014	11.12	11.229	11.371	93.52	92.486	93.729	42.871	42.978	43.941	14.7	13.42	13.549	14.941	13.292	13.359	99.89	100.849	99.588	45.069	45.061	46.229	115.869	101.618	103.492	103.853	103.216	103.261	102.273	104.671	102.057	47.914	47.167	49.014
38	2280	8.327	7.686	9.006	10.137	10.012	11.469	106.351	104.363	104.196	53.478	50.084	53.263	13.231	12.202	11.025	11.194	11.241	11.439	93.741	92.673	93.904	42.814	42.79	43.937	14.727	13.569	13.731	14.984	13.373	13.306	100.076	101.267	99.682	45.051	45.031	46.32	116.022	101.506	103.39	104.157	103.086	103.339	102.316	104.678	101.986	47.955	47.237	49.045
38.3333	2300	8.435	7.471	8.563	9.722	9.775	11.522	106.414	104.341	104.045	53.418	49.933	53.296	13.227	12.222	11.045	11.182	11.214	11.355	94.037	93.171	93.971	42.996	43.004	43.994	14.824	13.618	13.775	15.284	13.545	13.665	100.506	101.433	99.6	45.188	45.104	46.306	115.896	101.773	103.431	104.224	103.255	103.365	102.202	104.694	102.106	48.053	47.325	49.159
38.6667	2320	8.4	7.647	8.992	10.145	10.102	11.571	106.616	104.655	104.357	53.216	49.973	53.206	13.384	12.173	11.086	11.057	11.218	11.396	94.088	93.169	94.306	42.953	42.769	43.973	15.118	13.696	13.882	15.267	13.522	13.747	100.335	101.382	99.792	44.967	44.929	46.267	115.775	101.776	103.663	104.314	103.376	103.682	102.349	104.839	102.147	48.065	47.231	48.841
39	2340	8.249	7.282	8.369	9.455	9.869	11.8	106.869	104.635	104.406	53.322	49.882	53.286	13.257	12.178	11.045	11.108	11.212	11.341	94.396	93.575	94.412	42.894	42.729	44.049	15.075	13.773	13.92	15.243	13.635	13.455	100.773	101.649	100.029	45.061	45.094	46.176	115.906	101.745	103.345	104.31	103.218	103.676	102.567	104.976	101.918	47.98	47.282	48.955
39.3333	2360	8.275	7.694	9.029	10.231	10.133	11.773	106.782	104.861	104.657	53.404	49.804	53.212	13.38	12.229	11.051	11.106	11.224	11.445	94.716	93.596	94.857	42.863	42.755	43.798	15.124	13.827	13.904	15.3	13.569	13.58	100.855	101.857	99.957	44.969	44.829	46.184	116.151	102.069	103.545	104.527	103.467	103.718	102.492	104.961	102.41	47.792	47.069	48.871
39.6667	2380	8.4	7.52	8.629	9.753	9.884	11.837	106.857	105.094	104.637	53.367	49.994	53.225	13.318	12.249	10.984	11.082	11.184	11.371	94.345	93.537	94.782	42.892	42.894	44.057	15.233	13.922	14.065	15.278	13.649	13.582	100.882	101.939	100.114	44.975	44.902	46.288	116.175	101.998	103.647	104.461	103.651	103.743	102.569	105.139	102.241	48.125	47.165	49.033
40	2400	8.2	7.547	8.818	9.978	10.255	11.951	107.096	105.073	104.798	53.294	49.845	53.167	13.302	12.229	11.024	11.059	11.22	11.404	94.833	94.073	95.096	42.837	42.765	43.886	15.288	14.006	14.271	15.569	13.555	13.71	101.302	102.073	100.457	45.09	44.884	46.243	116.249	102.106	103.549	104.604	103.512	103.931	102.639	105.206	102.329	48.029	47.194	48.965
40.3333	2420	8.216	7.392	8.502	9.749	10.086	12.055	107.002	105.147	105.063	53.414	49.747	53.28	13.412	12.155	11.025	11.178	11.235	11.406	95.171	94.353	95.335	43.037	42.865	43.847	15.435	14.059	14.355	15.48	13.753	13.902	101.382	102.363	100.618	45.027	45.02	46.235	116.155	102.051	103.786	104.624	103.722	103.851	102.661	105.251	102.314	48.027	47.237	48.971
40.6667	2440	8.245	7.488	8.594	9.924	10.082	12.012	107.12	105.09	104.916	53.276	49.812	53.169	13.376	12.129	10.998	11.149	11.224	11.4	95.373	94.175	95.425	42.886	42.786	43.959	15.394	14.114	14.324	15.561	13.859	13.99	101.539	102.663	100.71	45.031	45.041	46.251	116.465	102.09	103.641	104.767	103.914	103.869	102.68	105.518	102.606	47.969	47.165	48.798
41	2460	8.512	7.557	8.592	9.882	9.9	11.98	107.269	105.253	105.063	53.116	49.786	53.049	13.284	12.131	11.055	11.218	11.204	11.38	95.318	94.447	95.488	42.849	42.68	43.869	15.343	14.261	14.435	15.561	13.939	14.049	101.451	102.398	100.763	44.959	44.778	46.169	116.286	102.106	103.865	104.71	103.78	104.004	102.58	105.41	102.475	48.024	47.078	48.922
41.3333	2480	8.506	7.72	8.818	10.204	9.906	11.98	107.378	105.541	105.055	53.114	49.72	53.035	13.343	12.229	11.039	11.218	11.22	11.457	95.459	94.547	95.833	42.782	42.822	43.837	15.439	14.304	14.394	15.657	14.147	14.412	101.751	102.82	101.124	44.929	44.831	46.035	116.461	102.047	103.955	104.804	103.692	104.033	102.853	105.194	102.553	47.935	47.188	48.912
41.6667	2500	8.451	7.682	8.871	10.102	10.151	12.202	107.516	105.433	105.165	53.229	49.684	53.082	13.337	12.225	11.059	11.135	11.188	11.437	95.563	94.741	95.763	42.755	42.686	43.79	15.551	14.355	14.475	15.863	14.365	14.416	101.859	102.859	101.1	44.831	44.716	46.2	116.494	102.245	103.953	104.843	103.906	103.982	102.833	105.518	102.724	48.184	47.171	49.008
42	2520	8.461	7.553	8.612	9.876	9.945	12.498	107.573	105.537	105.218	53.078	49.718	53.129	13.433	12.245	11.094	11.2	11.194	11.453	95.61	94.624	95.529	42.833	42.592	43.851	15.576	14.31	14.582	15.906	14.418	14.545	101.859	102.973	101.01	44.853	44.81	46.118	116.6	102.167	103.902	104.79	103.818	104.365	102.973	105.363	102.635	48.151	47.176	48.959
42.3333	2540	8.637	7.824	9.006	10.155	9.925	12.682	107.561	105.52	105.312	53.182	49.633	53.069	13.38	12.292	11.084	11.255	11.198	11.48	95.898	94.943	96.031	42.882	42.663	43.982	15.716	14.524	14.461	15.967	14.443	14.806	102.178	103.369	101.376	44.947	44.908	46.088	116.651	102.098	103.943	104.837	103.908	104.294	102.875	105.606	102.737	48.224	47.265	48.961
42.6667	2560	8.545	7.555	8.714	9.918	9.916	12.731	107.7	105.522	105.371	53.029	49.637	53.014	13.324	12.231	11.12	11.314	11.249	11.494	95.851	94.81	96.198	42.714	42.633	43.875	15.757	14.504	14.739	15.894	14.424	14.963	102.078	103.108	101.692	44.741	44.763	46.063	116.608	102.335	103.847	104.902	103.875	104.316	102.878	105.625	102.684	48.098	47.055	49.147
43	2580	8.437	7.588	8.837	10.055	10.006	12.614	107.692	105.625	105.476	53.084	49.608	52.831	13.41	12.247	11.135	11.204	11.243	11.441	96.086	95.239	96.251	42.782	42.633	43.763	15.835	14.5	14.718	16.073	14.608	15.076	102.355	103.522	101.488	44.8	44.769	46.11	116.551	102.276	103.876	105.061	104.031	104.339	102.908	105.757	102.796	48.114	47.294	49.067
43.3333	2600	8.475	7.486	8.573	9.778	9.798	12.718	107.949	105.802	105.518	52.986	49.557	53.022	13.453	12.241	11.127	11.182	11.167	11.463	96.376	95.39	96.537	42.573	42.465	43.804	15.916	14.604	14.743	16.09	14.629	15.037	102.575	103.427	101.671	44.759	44.708	45.945	116.792	102.204	103.961	105.175	104.214	104.525	102.884	105.643	102.767	48.012	47.143	49.035
43.6667	2620	8.553	7.714	8.818	10.082	9.857	12.637	107.992	105.871	105.549	52.937	49.545	53.1	13.461	12.333	11.165	11.271	11.245	11.461	95.976	95.331	96.361	42.627	42.671	43.678	15.778	14.629	14.643	16.125	14.52	15.329	102.388	103.529	101.814	44.808	44.612	46.029	117.024	102.457	104.225	105.018	104.122	104.402	103.171	105.776	102.988	48.124	47.08	48.751
44	2640	8.353	7.422	8.347	9.627	9.912	12.733	107.975	105.869	105.718	52.967	49.569	52.914	13.398	12.325	11.12	11.178	11.257	11.498	96.339	95.514	96.222	42.635	42.573	43.641	15.898	14.784	14.953	16.051	14.52	15.447	102.627	103.518	101.861	44.722	44.704	46.012	116.843	102.498	104.222	105.086	104.414	104.486	103.151	105.635	102.978	48.118	47.076	48.941
44.3333	2660	8.52	7.8	9.11	10.278	9.971	12.825	107.976	105.696	105.565	53.02	49.635	52.753	13.39	12.241	11.118	11.208	11.263	11.453	96.355	95.665	96.518	42.704	42.535	43.741	15.976	14.724	14.967	16.214	14.62	15.671	102.676	103.637	101.837	44.78	44.7	45.953	116.682	102.433	103.89	105.224	104.284	104.475	103.286	105.849	102.853	48.133	47.161	48.829
44.6667	2680	8.584	7.757	8.869	10.129	9.896	12.957	108.098	105.927	105.78	52.902	49.565	52.863	13.475	12.259	11.114	11.125	11.253	11.445	96.355	95.522	96.341	42.773	42.59	43.718	16.073	14.986	14.973	16.21	14.647	15.796	102.702	103.89	101.906	44.806	44.769	46.149	116.518	102.453	104.322	105.057	104.357	104.653	103.122	106.027	102.986	48.098	47.094	48.831
45	2700	8.702	7.814	9.096	10.275	9.916	13.006	108.139	106.031	105.729	52.847	49.588	52.796	13.5	12.255	11.118	11.265	11.273	11.486	96.382	95.41	96.551	42.622	42.731	43.784	16.196	14.775	15.084	16.316	14.757	15.943	102.751	103.739	102.229	44.659	44.535	46.043	116.876	102.529	104.249	105.212	104.145	104.588	103.186	105.645	102.875	48.227	47.092	49.041
45.3333	2720	8.437	7.482	8.527	9.667	9.935	13.041	108.02	106.157	105.755	52.943	49.547	52.804	13.522	12.357	11.194	11.237	11.255	11.525	96.537	95.743	96.684	42.696	42.52	43.512	16.19	15.094	15.139	16.339	14.749	16.133	102.918	103.982	102.175	44.586	44.58	46.008	116.965	102.335	104.073	105.302	104.09	104.545	103.194	105.892	102.927	48.137	47.124	48.908
45.6667	2740	8.578	7.702	8.61	10.025	9.91	13.149	108.159	106.094	106.039	52.775	49.533	52.71	13.557	12.312	11.171	11.245	11.288	11.561	96.655	95.688	96.639	42.675	42.427	43.702	16.165	14.957	15.173	16.518	14.892	16.114	102.847	104.022	102.11	44.533	44.616	45.878	116.825	102.602	104.214	105.375	104.235	104.659	103.51	105.763	103.008	48.267	47.104	48.833
46	2760	8.431	7.406	8.437	9.647	9.776	13.124	108.155	106.098	105.851	52.876	49.533	52.773	13.378	12.235	11.108	11.157	11.225	11.567	96.763	95.757	96.741	42.804	42.688	43.806	16.206	15.063	15.231	16.527	14.945	16.251	103.325	104.259	102.229	44.831	44.788	46.09	116.906	102.647	104.265	105.337	104.425	104.651	103.369	105.878	103.096	48.127	47.182	48.965
46.3333	2780	8.524	7.59	8.659	9.904	9.841	13.176	108.424	106.104	105.894	52.818	49.58	52.7	13.614	12.375	11.239	11.322	11.261	11.569	96.776	95.845	96.922	42.729	42.633	43.547	16.135	15.122	15.186	16.814	14.978	16.525	103.143	103.986	102.482	44.622	44.604	46.088	116.878	102.633	104.512	105.349	104.359	104.582	103.425	106.124	103.043	48.135	47.106	48.988
46.6667	2800	8.729	7.847	8.922	10.159	9.773	13.159	108.259	106.502	106.116	52.859	49.527	52.822	13.441	12.412	11.245	11.28	11.308	11.612	96.927	96.063	96.982	42.845	42.575	43.635	16.196	15.075	15.212	16.72	14.965	16.629	103.159	104.361	102.457	44.873	44.763	46.053	116.888	102.694	104.614	105.249	104.478	104.596	103.388	106.012	103.127	48.161	47.039	49.022
47	2820	8.355	7.496	8.708	9.953	10.18	13.206	108.375	106.231	106.208	52.61	49.224	52.657	13.488	12.386	11.22	11.251	11.253	11.551	96.888	96.063	97.127	42.422	42.484	43.439	16.184	15.045	15.155	16.804	15.116	16.847	103.057	104.2	102.373	44.575	44.586	45.733	116.892	102.408	104.386	105.159	104.241	104.575	103.541	106.086	103.153	48.261	47.051	48.988
47.3333	2840	8.324	7.4	8.48	9.739	10.116	13.222	108.61	106.327	106.159	52.604	49.247	52.7	13.429	12.227	11.096	11.139	11.167	11.518	97.063	96.243	97.175	42.586	42.484	43.631	16.194	15.229	15.424	16.673	15.178	16.876	103.208	104.235	102.833	44.443	44.441	45.861	117.276	102.735	104.502	105.314	104.318	104.763	103.402	106.022	103.28	48.027	47.073	48.847
47.6667	2860	8.449	7.516	8.547	9.833	9.831	13.28	108.522	106.582	106.329	52.596	49.445	52.684	13.457	12.375	11.171	11.214	11.192	11.567	97.1	96.384	97.404	42.663	42.531	43.598	16.231	15.08	15.337	16.802	15.178	17.018	103.402	104.373	102.59	44.616	44.62	45.939	117.035	102.576	104.598	105.22	104.255	104.62	103.429	105.839	103.253	48.235	47.047	48.835
48	2880	8.531	7.584	8.759	10.022	9.88	13.251	108.663	106.461	106.292	52.59	49.343	52.737	13.48	12.337	11.3	11.28	11.249	11.704	97.218	96.402	97.484	42.61	42.582	43.708	16.153	15.18	15.243	16.869	15.386	17.259	103.361	104.875	102.625	44.722	44.696	45.955	117.322	102.869	104.673	105.416	104.361	104.89	103.49	106.084	103.292	48.214	47.21	49.122
48.3333	2900	8.667	7.647	8.688	10.045	9.804	13.325	108.796	106.527	106.359	52.649	49.433	52.708	13.529	12.365	11.22	11.237	11.31	11.673	97.39	96.792	97.71	42.765	42.684	43.657	16.28	15.157	15.32	16.865	15.304	17.376	103.549	104.586	102.925	44.614	44.575	45.947	117.425	102.873	104.759	105.441	104.522	104.624	103.58	106.369	103.384	48.18	47.11	48.969
48.6667	2920	8.527	7.771	9.106	10.341	10.3	13.492	108.937	106.72	106.551	52.655	49.329	52.676	13.469	12.327	11.176	11.325	11.294	11.6	97.769	96.741	97.863	42.818	42.449	43.653	16.457	15.337	15.518	17.149	15.386	17.367	103.71	104.941	103.004	44.545	44.631	45.792	117.204	102.81	104.665	105.647	104.812	105.041	103.804	106.465	103.437	48.167	47.09	49.055
49	2940	8.735	7.786	9.055	10.151	9.767	13.406	108.894	106.584	106.471	52.635	49.275	52.71	13.498	12.435	11.284	11.3	11.265	11.663	97.482	96.716	97.851	42.718	42.522	43.602	16.604	15.32	15.367	16.951	15.469	17.453	103.837	104.747	102.804	44.678	44.704	45.996	117.325	103.116	104.629	105.437	104.494	104.943	103.618	106.19	103.545	48.182	47.084	48.943
49.3333	2960	8.714	7.788	8.851	10.229	9.88	13.614	108.876	106.759	106.547	52.631	49.222	52.635	13.633	12.412	11.371	11.298	11.243	11.71	97.875	97.006	97.953	42.708	42.559	43.422	16.39	15.482	15.62	17.02	15.42	17.441	103.825	104.843	102.996	44.463	44.543	45.933	117.408	103.088	104.665	105.567	104.59	104.863	103.437	106.245	103.518	48.269	47.124	49.082
49.6667	2980	8.561	7.735	9.094	10.351	10.096	13.508	109.088	106.837	106.69	52.386	49.178	52.645	13.488	12.327	11.114	11.176	11.214	11.62	97.91	97.184	98.073	42.4	42.365	43.41	16.431	15.461	15.498	16.706	15.565	17.406	104.033	105.131	103.231	44.696	44.565	45.771	117.48	103.082	104.745	105.588	104.796	105.027	103.78	106.461	103.569	48.159	47.082	48.975
50	3000	8.769	7.957	9.131	10.343	9.843	13.465	109.049	106.851	106.651	52.4	49.275	52.639	13.453	12.398	11.284	11.257	11.229	11.641	97.784	96.912	98.357	42.58	42.555	43.584	16.569	15.445	15.527	16.871	15.698	17.478	103.947	105.19	102.99	44.647	44.667	45.898	117.396	102.933	104.898	105.741	104.59	104.937	103.724	106.345	103.349	48.251	47.284	49.094
50.3333	3020	8.361	7.543	8.763	9.949	10.196	13.759	109.059	106.79	106.849	52.276	49.084	52.359	13.5	12.353	11.267	11.239	11.276	11.765	98.335	97.053	98.267	42.384	42.275	43.437	16.561	15.543	15.696	16.816	15.7	17.559	104.227	105.157	103.198	44.412	44.537	45.641	117.461	103.059	104.657	105.641	104.582	104.773	103.729	106.427	103.575	48.061	46.961	48.753
50.6667	3040	8.339	7.647	8.859	10.049	10.202	13.81	108.969	106.951	106.806	52.267	49.141	52.312	13.541	12.412	11.245	11.359	11.229	11.776	98.075	97.473	98.469	42.427	42.267	43.318	16.625	15.48	15.702	16.655	15.861	17.561	104.261	105.467	103.239	44.422	44.488	45.704	117.463	102.861	104.882	105.59	104.667	104.969	103.733	106.439	103.525	48.192	47.016	48.702
51	3060	8.355	7.555	8.818	9.906	10.01	13.737	109.153	106.961	106.694	52.276	49.1	52.159	13.427	12.39	11.251	11.329	11.235	11.698	98.482	97.331	98.667	42.345	42.222	43.375	16.643	15.527	15.659	16.643	15.945	17.625	104.367	105.465	103.608	44.376	44.431	45.551	117.78	103.304	104.963	105.725	104.884	105.125	103.971	106.455	103.745	48.078	46.902	48.773
51.3333	3080	8.663	7.849	8.912	10.118	9.798	13.649	109.257	106.814	106.933	52.198	49.024	52.229	13.602	12.416	11.245	11.275	11.282	11.704	98.553	97.694	98.578	42.41	42.324	43.39	16.382	15.237	15.288	16.524	15.949	17.61	104.457	105.429	103.557	44.418	44.347	45.622	117.7	103.184	104.99	105.735	104.706	105.257	103.935	106.478	103.688	48.171	46.89	48.71
51.6667	3100	8.645	7.937	9.147	10.306	9.908	13.651	109.235	107.112	106.978	52.298	49.137	52.298	13.639	12.427	11.357	11.269	11.361	11.8	98.624	97.724	98.8	42.429	42.161	43.257	16.418	15.351	15.386	16.714	15.965	17.671	104.414	105.408	103.604	44.306	44.396	45.661	117.608	103.382	105.167	105.876	104.71	105.127	103.931	106.675	103.88	48.131	47.02	48.718
52	3120	8.584	7.788	9.082	10.233	9.976	13.737	109.525	107.147	107.027	52.416	49.11	52.267	13.567	12.488	11.271	11.286	11.265	11.849	98.888	97.863	99.037	42.247	42.125	43.412	16.625	15.329	15.408	16.912	16.004	17.704	104.596	105.655	103.718	44.349	44.484	45.743	117.765	103.425	105.078	105.808	104.767	105.078	104.078	106.58	103.753	48.116	46.996	48.971
52.3333	3140	8.467	7.761	8.949	10.008	9.867	13.761	109.216	106.98	106.722	52.171	48.967	52.412	13.539	12.425	11.255	11.271	11.192	11.798	98.845	97.967	98.941	42.359	42.12	43.335	16.549	15.427	15.496	16.743	15.984	17.82	104.527	105.72	103.663	44.476	44.465	45.578	117.614	103.351	105	105.602	104.81	105.045	104.092	106.351	103.592	48.192	46.775	48.92
52.6667	3160	8.498	7.49	8.539	9.686	9.833	13.967	109.512	107.206	106.978	52.2	49.125	52.431	13.586	12.373	11.292	11.347	11.233	11.837	98.982	98.141	99.09	42.59	42.457	43.561	16.863	15.565	15.775	16.743	16.196	17.953	104.471	105.79	104.043	44.38	44.484	45.725	117.649	103.469	105.141	105.808	104.857	105.198	103.935	106.557	103.633	48.21	46.904	48.88
53	3180	8.414	7.616	8.867	10.173	10.133	13.973	109.588	107.175	107.267	52.131	48.973	52.298	13.663	12.431	11.388	11.414	11.292	11.967	99.314	98.357	99.12	42.476	42.32	43.478	16.827	15.635	15.724	16.684	16.22	17.947	104.653	106.027	103.855	44.373	44.441	45.698	117.865	103.243	105.114	105.835	104.771	105.192	104.065	106.659	103.743	48.308	47.098	48.861
53.3333	3200	8.545	7.578	8.688	9.81	9.727	14.002	109.639	107.302	107.155	52.222	49.033	52.255	13.625	12.475	11.384	11.253	11.304	11.892	99.41	98.457	99.371	42.355	42.306	43.48	16.827	15.614	15.655	16.79	16.282	18.014	105.116	105.884	104.137	44.402	44.445	45.569	117.933	103.459	105.32	106.076	105.014	105.241	104.145	106.706	103.939	48.08	47.014	48.665
53.6708	3220.25	8.761	7.827	8.998	10.141	9.749	13.918	109.565	107.484	107.308	52.086	48.89	52.284	13.604	12.484	11.365	11.265	11.278	11.849	99.473	98.602	99.449	42.343	42.245	43.341	16.865	15.541	15.575	16.812	16.337	17.98	105.161	106.055	104.259	44.243	44.41	45.6	118.008	103.431	105.278	105.971	105.086	105.41	104.365	106.769	103.845	48.104	46.931	48.896
54	3240	8.612	7.682	8.812	9.969	9.908	14.047	109.669	107.353	107.127	52.102	48.953	52.347	13.608	12.422	11.396	11.337	11.296	11.894	99.271	98.412	99.598	42.475	42.355	43.576	16.878	15.708	15.82	16.914	16.482	18.214	105.035	106.029	104.143	44.367	44.437	45.661	117.927	103.482	105.237	105.816	104.951	105.124	103.998	106.841	103.841	48.212	46.967	48.769
54.3333	3260	8.59	7.859	9.151	10.304	10.01	13.996	109.682	107.278	107.153	52.076	49.051	52.073	13.565	12.471	11.276	11.32	11.286	11.957	99.573	98.392	99.543	42.261	42.098	43.224	16.949	15.676	15.676	16.9	16.38	18.057	105.063	106.055	104.186	44.253	44.373	45.5	117.886	103.482	104.951	105.731	104.72	105.098	103.925	106.667	103.765	48.01	46.898	48.665
54.6667	3280	8.435	7.71	8.969	10.222	10.131	14.069	109.986	107.465	107.325	52.11	48.937	52.053	13.631	12.427	11.284	11.329	11.288	11.924	99.869	98.776	99.863	42.253	42.092	43.147	16.786	15.684	15.831	16.935	16.524	18.253	105.284	106.131	104.478	44.365	44.335	45.541	118.092	103.612	105.318	106	105.125	105.339	104.112	107.125	103.971	48.137	46.963	48.722
55	3300	8.525	7.782	9.029	10.182	10.102	14.173	109.743	107.392	107.171	52.049	48.855	52.308	13.743	12.573	11.367	11.416	11.288	12.053	99.782	98.541	99.751	42.186	42.133	43.331	16.859	15.602	15.978	16.88	16.502	18.249	105.292	106.433	104.335	44.259	44.465	45.708	117.978	103.424	105.259	105.835	104.88	105.18	104.147	106.624	103.712	48.045	46.982	48.771
55.3333	3320	8.588	7.72	8.698	9.841	9.861	14.157	109.678	107.637	107.359	51.98	48.99	52.104	13.661	12.496	11.424	11.276	11.21	12.031	99.684	98.576	99.876	42.218	42.061	43.224	16.886	15.798	15.829	17.002	16.502	18.261	105.229	106.227	104.406	44.155	44.41	45.447	118.057	103.571	105.333	105.886	104.796	105.235	104.12	106.778	103.982	48.082	47.039	48.827
55.6667	3340	8.61	7.739	8.741	9.937	9.935	14.139	109.829	107.525	107.435	51.998	48.855	51.998	13.747	12.551	11.437	11.259	11.276	12.102	99.886	98.806	99.912	42.255	41.988	43.222	16.798	15.843	15.812	17.041	16.588	18.335	105.541	106.457	104.549	44.259	44.4	45.424	118.063	103.716	105.163	105.925	104.943	105.335	104.212	106.878	104.19	48.041	46.8	48.843
56.0042	3360.25	8.584	7.598	8.653	9.818	9.804	14.163	109.984	107.653	107.512	52.147	48.875	52.141	13.775	12.465	11.459	11.437	11.331	12.114	100.071	99.082	100.065	42.351	42.169	43.363	16.971	15.808	15.875	17.035	16.857	18.333	105.624	106.727	104.812	44.192	44.41	45.604	118.32	103.624	105.461	105.953	105.271	105.388	104.247	107.027	103.867	48.102	46.992	48.888
56.3333	3380	8.51	7.484	8.578	9.698	9.922	14.137	109.914	107.559	107.422	51.89	48.741	52.047	13.776	12.594	11.502	11.294	11.3	12.196	100.163	99.055	100.304	42.165	42.186	43.284	16.867	15.92	15.918	16.986	16.584	18.429	105.598	106.449	104.671	44.184	44.29	45.496	118.055	103.775	105.32	106.088	105.214	105.114	104.51	107.049	104.192	48.084	47.075	48.971
56.6708	3400.25	8.512	7.724	8.941	10.202	10.027	14.269	110.002	107.649	107.512	51.933	48.839	52.112	13.714	12.576	11.355	11.375	11.304	12.11	100.165	99.3	100.367	42.31	42.018	43.308	16.824	15.798	15.859	17.116	16.641	18.451	105.749	106.698	104.865	43.969	44.394	45.486	118.227	103.61	105.447	106.063	105.065	105.614	104.424	107.161	104.035	48.135	47.067	48.843
57.0042	3420.25	8.555	7.776	9.049	10.275	10.053	14.218	110.225	107.639	107.553	51.994	48.824	52.01	13.71	12.575	11.416	11.402	11.288	12.208	100.125	99.159	100.527	42.165	42.035	43.278	16.837	15.735	15.851	17.043	16.847	18.39	105.861	106.622	104.91	44.139	44.308	45.42	118.369	103.969	105.535	106.024	105.208	105.439	104.453	106.914	104.143	48.169	46.955	48.929
57.3333	3440	8.576	7.639	8.775	9.902	9.859	14.253	110.145	107.565	107.586	51.902	48.731	52.047	13.796	12.51	11.488	11.392	11.282	12.18	100.318	99.406	100.445	42.239	42.092	43.404	16.967	15.912	16.047	17.186	16.886	18.543	105.849	106.853	104.818	44.218	44.367	45.322	118.253	103.692	105.575	106.171	105.098	105.451	104.518	107.018	104.192	48.265	47.157	48.916
57.6667	3460	8.422	7.512	8.645	9.837	10.049	14.278	110.102	107.729	107.62	51.849	48.688	51.971	13.725	12.58	11.51	11.306	11.282	12.231	100.529	99.525	100.394	42.245	42.014	43.271	16.953	15.72	16.039	17.247	16.839	18.563	106.022	106.706	105.1	44.145	44.384	45.478	118.129	103.671	105.627	106.022	105.008	105.351	104.69	107.284	104.259	48.137	47.088	48.876
58.0042	3480.25	8.641	7.576	8.698	9.9	10.045	14.294	109.824	107.888	107.525	51.918	48.894	52.225	13.759	12.512	11.441	11.28	11.359	12.325	100.702	99.659	100.739	42.476	42.129	43.376	17.09	15.908	15.98	17.296	16.994	18.569	106.061	107.055	105.373	44.265	44.559	45.714	118.367	103.827	105.484	105.906	105.114	105.492	104.58	107.114	104.253	48.141	47.106	48.916
58.3333	3500	8.506	7.524	8.451	9.684	9.812	14.2	110.043	107.759	107.624	51.843	48.592	51.996	13.667	12.502	11.443	11.212	11.269	12.355	100.618	99.527	100.553	42.088	41.873	43.263	16.888	15.665	15.837	17.253	16.78	18.61	105.839	106.747	105.112	44.104	44.28	45.335	118.353	103.829	105.606	106.059	105.108	105.175	104.727	107.194	104.229	48.084	47.043	48.841
58.6708	3520.25	8.457	7.637	8.976	10.188	10.084	14.292	110.149	108.002	107.859	51.765	48.8	51.988	13.841	12.537	11.453	11.412	11.322	12.386	100.692	99.684	100.935	42.19	42.053	43.306	16.996	15.89	15.876	17.312	17.002	18.661	106.151	107.002	105.333	43.994	44.376	45.443	118.416	103.792	105.659	106.286	105.086	105.455	104.606	107.176	104.559	48.075	47.049	48.904
59	3540	8.453	7.712	8.878	10.18	10.094	14.243	110.275	107.986	107.78	51.71	48.655	52.096	13.78	12.514	11.463	11.324	11.271	12.42	100.692	99.659	100.841	42.182	42.116	43.339	16.925	15.924	15.99	17.171	16.957	18.757	106.233	107.282	105.447	44.116	44.341	45.443	118.233	103.79	105.62	106.039	105.053	105.416	104.549	107.02	104.192	48.092	47.153	49.006
59.3333	3560	8.68	7.733	8.778	9.969	9.724	14.341	110.3	107.72	107.714	51.829	48.596	52	13.859	12.567	11.582	11.345	11.31	12.486	100.878	99.835	100.798	42.145	42.022	43.331	16.957	15.943	15.971	17.455	17.082	18.859	106.269	107.094	105.476	44.124	44.29	45.559	118.476	103.896	105.633	106.149	105.463	105.408	104.492	107.269	104.247	48.069	47.137	48.916
59.6667	3580	8.688	7.753	8.78	10.008	9.794	14.186	110.363	108.02	107.943	51.79	48.816	51.927	13.796	12.518	11.425	11.396	11.384	12.545	100.763	99.835	101.078	42.306	42.075	43.2	17.006	15.963	16.025	17.341	17.129	18.775	106.398	107.19	105.604	44.104	44.314	45.408	118.52	103.978	105.771	106.175	105.224	105.363	104.578	107.21	104.386	48.102	47.104	48.998
60.0042	3600.25	8.651	7.796	9.19	10.288	10.161	14.225	110.406	107.927	107.82	51.588	48.612	51.827	13.843	12.576	11.498	11.443	11.398	12.539	100.996	99.973	101.141	42.139	41.99	43.284	17.012	15.875	15.951	17.441	17.002	18.773	106.471	107.245	105.543	44.133	44.337	45.596	118.58	104.208	105.622	106.106	105.345	105.467	104.865	107.418	104.514	48.071	47.078	48.947
60.3375	3620.25	8.749	7.935	9.284	10.441	9.988	14.251	110.273	107.988	107.845	51.739	48.58	52.008	13.853	12.592	11.518	11.384	11.447	12.7	101.045	100.01	100.875	42.061	41.949	43.241	17.112	15.796	15.853	17.433	17.202	18.786	106.533	107.384	105.565	44.018	44.276	45.471	118.508	103.965	105.794	106.218	105.165	105.414	104.541	107.214	104.41	48.116	47.141	48.818
60.6708	3640.25	8.588	7.663	8.924	10.124	10.057	14.408	110.302	108.061	108.018	51.763	48.704	51.835	13.78	12.553	11.567	11.282	11.339	12.686	101.416	100.229	101.398	42.129	42.173	43.28	17.082	16.031	16.067	17.367	17.273	18.869	106.673	107.533	105.659	44.116	44.465	45.533	118.727	104.022	105.847	106.265	105.373	105.616	104.894	107.398	104.573	48.098	47.21	48.978
61.0042	3660.25	8.645	7.618	8.718	9.831	9.635	14.276	110.504	107.945	107.933	51.804	48.735	51.961	13.81	12.539	11.459	11.386	11.388	12.78	101.314	100.184	101.306	42.286	42.065	43.349	17.12	15.884	15.878	17.543	17.122	18.971	106.52	107.584	105.582	44.21	44.359	45.422	118.641	104.053	105.933	106.02	105.188	105.576	104.663	107.339	104.557	48.031	47.271	49.073
61.3375	3680.25	8.465	7.571	8.833	10.014	10.161	14.38	110.463	108.067	107.963	51.729	48.706	52.029	13.855	12.529	11.52	11.469	11.296	12.859	101.331	100.339	101.304	42.333	42.18	43.457	17.08	16.022	15.996	17.533	17.333	18.982	106.68	107.59	105.61	44.188	44.42	45.651	118.551	104.106	105.676	106.216	105.2	105.492	104.79	107.414	104.382	48.018	47.233	49.002
61.6667	3700	8.659	7.737	8.814	9.996	9.875	14.427	110.543	108.259	107.9	51.704	48.541	51.806	13.849	12.573	11.473	11.361	11.392	12.88	101.314	100.294	101.392	42.125	42.122	43.259	17.041	16.073	15.992	17.465	17.345	18.975	106.518	107.471	105.498	44.112	44.202	45.473	118.784	104.173	105.937	106.412	105.167	105.629	104.698	107.325	104.527	47.914	47.022	48.978
62	3720	8.541	7.596	8.602	9.747	9.867	14.406	110.727	108.008	108.222	51.696	48.657	51.82	13.833	12.457	11.422	11.359	11.349	12.959	101.449	100.176	101.349	42.198	42.135	43.216	17.196	15.865	15.98	17.514	17.286	18.975	106.582	107.584	105.502	44.031	44.229	45.482	118.651	104.343	105.847	106.137	105.335	105.529	104.822	107.218	104.71	47.996	47.247	48.939
62.3333	3740	8.584	7.588	8.631	9.859	9.924	14.376	110.537	108.239	107.808	51.588	48.488	51.745	13.847	12.52	11.414	11.396	11.365	13.016	101.271	100.435	101.663	42.214	42.037	43.225	17.102	15.955	15.976	17.559	17.325	19.067	106.557	107.569	105.675	44.037	44.382	45.565	118.72	104.114	105.906	106.408	105.294	105.471	104.78	107.596	104.612	48.086	47.235	48.935
62.6708	3760.25	8.631	7.802	9.02	10.165	9.884	14.424	110.571	108.208	107.871	51.625	48.578	51.849	13.855	12.625	11.557	11.512	11.39	13.135	101.798	100.475	101.565	42.253	42.08	43.161	17.143	15.906	16.09	17.696	17.373	19.047	106.563	107.5	105.476	44.125	44.38	45.416	118.749	104.275	106.104	106.2	105.229	105.488	104.718	107.449	104.39	48.135	47.155	49.127
63.0042	3780.25	8.604	7.818	9.073	10.371	10.098	14.418	110.749	108.188	108.194	51.476	48.545	51.633	13.843	12.443	11.471	11.427	11.404	13.176	101.743	100.502	101.694	41.947	41.984	43.296	17.053	15.953	16.116	17.594	17.347	19.163	106.522	107.598	105.6	43.978	44.265	45.496	118.806	104.288	106.302	106.222	105.21	105.535	105.031	107.473	104.655	48.031	47.227	48.98
63.3375	3800.25	8.682	7.773	8.902	10.082	9.957	14.39	110.645	108.316	108.135	51.5	48.602	51.835	13.945	12.535	11.504	11.465	11.433	13.431	101.633	100.612	101.606	42.247	42.206	43.249	17.194	16.049	16.151	17.692	17.504	19.225	106.504	107.651	105.422	44.004	44.543	45.571	118.839	104.18	106.104	106.267	105.171	105.28	104.886	107.622	104.622	48.124	47.392	49.035
63.6708	3820.25	8.527	7.508	8.608	9.771	9.902	14.498	110.82	108.327	108.159	51.629	48.539	51.845	13.924	12.596	11.512	11.408	11.424	13.49	101.655	100.759	101.741	42.178	42.133	43.204	17.151	16.016	16.055	17.712	17.541	19.151	106.765	107.645	105.41	43.978	44.443	45.62	118.953	104.339	105.845	106.22	105.247	105.422	104.955	107.371	104.727	48.076	47.325	49.086
64.0042	3840.25	8.849	7.973	9.153	10.275	9.784	14.369	110.718	108.206	108.124	51.539	48.606	51.859	13.831	12.584	11.604	11.506	11.388	13.492	101.969	100.718	101.829	42.296	42.086	43.233	17.329	15.914	16.01	17.665	17.561	19.222	106.371	107.404	105.708	44.08	44.52	45.645	119.233	104.308	106.098	106.314	105.29	105.58	104.951	107.48	104.588	48.088	47.28	49.202
64.3375	3860.25	8.622	7.839	9.127	10.3	9.963	14.486	110.716	108.208	108.114	51.32	48.351	51.733	13.904	12.616	11.443	11.406	11.331	13.576	101.788	100.684	101.969	42.055	42.084	43.218	17.204	15.933	15.845	17.616	17.408	19.253	106.425	107.629	105.614	43.939	44.51	45.508	118.839	104.427	106.155	106.143	105.253	105.467	104.973	107.416	104.58	47.92	47.329	49.057
[truncated: 48 more columns]

## Sheet: MTP2_raw
Time (h)	Time (min)	A1	A2	A3	A4	A5	A6	A7	A8	A9	A10	A11	A12	B1	B2	B3	B4	B5	B6	B7	B8	B9	B10	B11	B12	C1	C2	C3	C4	C5	C6	C7	C8	C9	C10	C11	C12	D1	D2	D3	D4	D5	D6	D7	D8	D9	D10	D11	D12
0	0	5.827	6.91	7.553	8.822	9.659	9.622	9.01	7.827	7.314	6.998	6.957	7.747	7.024	7.545	10.094	9.237	9.194	9.708	9.345	8.559	9.188	6.949	6.771	7.094	6.902	6.673	8.031	7.861	7.576	7.669	7.671	8.298	8.257	6.867	6.233	6.365	6.394	6.218	7.327	7.251	7.467	7.504	7.545	8.092	6.857	6.292	6.127	5.912
0.333333	20	5.857	7.245	8.004	9.278	9.676	9.551	8.843	7.761	7.151	6.871	6.814	7.753	7.28	7.937	10.631	9.827	9.359	9.273	8.967	8.018	8.847	7.322	6.888	7.151	6.933	6.776	8.08	7.886	7.475	7.514	7.504	7.99	8.08	6.857	6.592	6.459	6.476	6.392	7.447	7.359	7.557	7.394	7.365	8.149	6.992	6.476	6.214	6.01
0.666667	40	5.861	7.482	8.075	9.053	9.571	9.29	8.382	7.371	6.767	6.578	6.541	7.541	7.343	8.071	10.733	9.71	9.071	9.012	8.696	7.784	8.555	6.888	6.704	6.918	7.029	6.714	8.118	7.72	7.359	7.369	7.396	7.833	7.929	6.696	6.225	6.312	6.622	6.359	7.373	7.265	7.451	7.408	7.255	7.969	6.778	6.308	6.065	6.129
1	60	5.875	7.553	8.122	9.306	9.818	9.892	9.125	8.118	7.275	7.143	7.047	8.006	7.629	8.335	11.157	9.929	9.19	9.212	8.704	8.163	8.984	7.124	7.182	7.288	7.224	6.843	8.253	7.784	7.449	7.327	7.451	7.896	8.033	6.992	6.414	6.555	6.831	6.578	7.604	7.425	7.578	7.576	7.569	8.239	7.312	6.771	6.504	6.447
1.33333	80	5.855	7.504	7.798	8.776	9.378	9.39	8.873	7.896	7.214	6.976	6.924	7.853	7.533	8.104	10.527	9.516	9.014	8.998	8.592	7.967	8.58	6.992	6.7	7.224	7.12	6.722	8.443	7.767	7.549	7.447	7.575	7.967	7.81	6.867	6.273	6.478	6.835	6.518	7.684	7.494	7.639	7.459	7.506	8.282	7.124	6.855	6.598	6.398
1.66667	100	5.855	7.741	8.061	8.929	9.447	9.365	8.673	7.669	7.112	6.953	6.941	7.843	7.618	8.31	10.735	9.751	9.075	9.071	8.622	7.876	8.524	7.057	6.706	7.276	7.237	6.935	8.706	7.835	7.594	7.59	7.48	7.949	7.829	6.822	6.402	6.539	7.131	6.839	8.212	7.71	7.745	7.651	7.659	8.445	7.286	6.833	6.614	6.567
2	120	5.945	7.716	8.235	9.139	9.937	10.182	9.733	8.653	7.965	7.437	7.431	8.516	7.829	8.371	11.167	10.069	9.3	9.104	8.735	8.065	8.743	7.52	7.135	7.843	7.361	6.925	8.969	7.943	7.845	7.669	7.614	8.194	8.153	7.096	6.804	6.976	7.443	6.978	8.539	7.902	8.045	7.82	7.918	8.786	7.851	7.371	7.257	6.912
2.33333	140	5.812	7.843	8.182	9.055	9.731	9.849	9.178	8.304	7.516	7.29	7.202	8.182	7.959	8.447	11.059	9.912	9.325	9.133	9.016	8.576	9.049	7.551	7.255	7.81	7.512	7.186	9.08	7.949	7.773	7.973	8.037	8.592	8.571	7.267	6.804	7	7.639	7.396	8.749	8.255	8.053	8.114	8.108	8.927	7.976	7.5	7.376	7.035
2.66667	160	5.857	7.735	8.025	8.759	9.506	9.484	9.235	8.296	7.729	7.347	7.367	8.418	7.931	8.337	10.763	9.882	9.431	9.42	9.451	9.167	9.484	7.718	7.686	7.947	7.567	7.318	9.384	8.259	8.155	8.296	8.457	8.961	9.008	7.59	6.894	7.11	7.837	7.767	9.173	8.506	8.584	8.614	8.62	9.339	8.5	7.804	7.69	7.28
3	180	5.984	8.129	8.751	9.386	10.1	9.835	9.371	8.361	7.775	7.635	7.571	8.692	8.094	8.802	11.62	10.529	9.525	9.539	9.637	9.447	9.565	7.929	7.718	8.112	7.825	7.649	9.922	8.576	8.329	8.635	8.896	9.396	9.412	7.688	6.925	7.267	8.278	8.753	9.986	9.129	8.906	9.398	9.084	9.514	8.527	8.014	7.918	7.704
3.33333	200	5.902	8.167	8.884	9.447	10.282	10.145	9.763	8.835	8.269	7.724	7.865	9.175	8.394	8.994	11.847	10.661	9.792	9.937	10.455	10.225	10.365	8.404	7.847	8.488	7.982	8.057	10.198	8.692	8.749	9.135	9.555	9.963	9.961	8.145	7.155	7.5	8.676	9.667	10.553	9.661	9.596	10.21	9.706	10.333	9.076	8.518	8.435	8.302
3.66667	220	5.929	8.149	8.896	9.2	9.967	9.525	9.118	8.259	7.816	7.469	7.512	8.72	8.527	9.155	11.871	10.724	10.204	10.175	11.153	11.431	11.3	9.351	8.141	8.847	8.265	8.325	10.733	9.184	9.339	9.651	10.08	10.963	10.943	8.949	7.778	7.622	9.214	10.3	11.41	10.351	10.52	11.28	10.749	11.251	9.384	8.802	8.688	8.396
4	240	5.918	8.245	9.078	9.386	10.061	9.561	8.865	7.984	7.547	7.559	7.6	8.688	8.692	9.447	11.896	10.963	10.378	10.89	11.833	12.149	12.445	10.304	8.708	8.767	8.775	8.806	11.288	9.741	9.79	9.908	10.506	11.424	11.725	9.753	8.065	7.755	10.114	11.533	12.396	11.524	11.359	12.069	11.971	12.292	10.469	9.178	8.875	8.755
4.33333	260	5.884	8.182	9.061	9.116	9.892	9.512	8.849	8	7.692	7.573	7.749	8.922	9.039	9.584	12.155	11.251	10.763	11.598	12.347	12.649	13.79	11.822	10.212	9.098	9.341	9.165	11.816	10.476	10.229	10.32	10.965	11.875	12.433	10.81	9.137	8.11	11.359	12.727	13.194	12.551	12.31	12.653	12.871	13.82	11.81	9.792	9.645	9.235
4.66667	280	5.975	8.324	9.161	9.633	10.22	9.973	9.214	8.341	7.851	7.873	7.847	9.084	9.52	10.224	12.978	11.647	11.327	12.045	12.822	13.143	14.518	13.429	11.504	10.298	10.035	9.61	12.418	11.096	10.763	10.802	11.447	12.28	12.886	11.8	10.235	8.324	13.406	13.573	14.114	13.484	13.01	13.363	13.804	14.882	13.824	11.161	10.296	9.835
5	300	6.012	8.414	9.157	9.553	10.325	9.998	9.422	8.52	8.106	8.259	8.429	9.578	9.802	10.449	13.29	12.186	12.208	12.559	13.263	13.475	15.065	14.445	13.247	11.737	10.712	10.092	12.839	11.525	10.947	11.027	11.875	12.69	13.404	12.712	11.571	9.047	16.498	14.353	14.743	14.12	13.667	13.91	14.592	15.722	15.343	13.216	11.673	10.616
5.33333	320	5.914	8.337	9.035	9.245	9.876	9.608	9.018	8.208	7.792	8.167	8.133	9.043	9.961	10.665	13.835	12.857	12.927	12.878	13.608	13.849	15.563	15.288	14.733	13.663	11.706	10.818	13.059	11.8	11.067	11.275	12.031	12.949	13.712	13.347	12.841	9.959	17.976	15.014	15.275	14.543	14.382	14.631	15.175	16.6	16.486	15.822	14.129	11.627
5.66667	340	5.998	8.58	9.412	9.698	10.006	9.931	8.996	8.124	7.555	7.91	7.825	8.765	10.539	11.324	14.518	13.669	13.731	13.175	14.025	14.261	16.241	15.935	15.478	14.204	13.351	11.492	13.745	12.541	11.573	11.6	12.453	13.382	14.278	14.029	13.745	12.008	18.975	15.784	16.076	15.498	15.173	15.431	16.102	17.616	17.306	17.522	17.694	13.827
6	360	5.939	8.496	9.145	9.525	9.88	9.778	8.975	8.19	7.643	8.012	7.927	8.878	11.12	11.986	15.31	15.033	14.178	13.553	14.551	14.804	16.778	16.512	16.053	14.837	14.369	12.251	13.908	12.384	11.851	11.973	12.81	13.843	14.684	14.673	14.392	14.353	19.696	16.584	17.016	16.455	16.061	16.249	17.049	18.625	18.418	18.718	19.657	17.51
6.33333	380	5.951	8.422	9.041	9.271	9.955	9.918	9.424	8.702	8.18	8.555	8.527	9.506	11.81	12.965	16.412	16.098	14.557	13.959	15.392	15.457	17.537	17.663	17.01	15.343	15.514	12.88	14.382	13.273	12.38	12.571	13.394	14.492	15.308	15.361	15.053	15.631	20.661	17.614	18.116	17.445	17.202	17.329	18.155	19.631	19.335	19.79	20.773	20.667
6.66667	400	6.018	8.765	9.625	9.837	10.229	10.204	9.455	8.761	7.99	8.512	8.459	9.453	12.98	13.933	17.245	16.465	15.12	14.447	15.998	16.227	18.131	18.365	17.973	16.151	16.22	13.498	15.12	13.898	13.088	13.171	14.025	15.08	15.841	15.843	15.706	16.337	22.086	18.816	19.414	18.761	18.48	18.447	19.412	20.965	20.58	20.863	21.712	22.751
7	420	5.937	8.547	9.261	9.331	9.996	9.996	9.586	8.757	8.218	8.7	8.655	9.586	14.514	14.406	17.563	16.716	15.535	14.943	16.875	17.084	19.159	19.347	18.592	17.002	16.78	13.741	15.343	13.971	13.524	13.696	14.778	15.749	16.573	16.606	16.382	17.053	23.62	20.22	20.625	20.006	19.898	19.814	20.7	22.42	21.908	22.078	22.727	24.361
7.33333	440	5.98	8.761	9.663	9.716	10.076	10.094	9.402	8.616	8.027	8.461	8.204	9.28	15.692	14.749	17.669	17.373	16.151	15.39	17.861	17.951	19.953	20.088	19.563	17.967	17.167	14.139	15.771	14.504	14.141	14.261	15.38	16.404	17.155	17.255	16.937	17.643	25.333	21.594	22.033	21.533	21.433	21.331	22.261	23.951	23.296	23.447	24.016	25.249
7.66667	460	5.845	8.729	9.543	9.325	9.841	9.992	9.439	8.537	8.065	8.378	8.147	9.216	16.196	15.024	17.808	17.867	16.724	16.12	19.088	19.282	21.237	21.494	21.073	19.065	17.843	14.549	16.239	15.29	14.816	14.871	16.294	17.229	17.996	18.116	17.763	18.633	27.122	23.208	23.669	23.088	22.904	22.745	23.767	25.7	24.916	24.973	25.622	26.925
8	480	5.904	8.833	9.641	9.52	10.002	10.114	9.378	8.62	8.049	8.292	8.084	9.224	16.529	15.373	18.214	18.578	17.41	16.798	20.516	20.439	22.453	22.602	22.347	20.367	18.469	14.961	16.718	15.984	15.745	15.802	17.353	18.098	18.835	19.016	18.52	19.508	29.082	24.875	25.273	24.775	24.665	24.551	25.416	27.498	26.643	26.775	27.363	29.069
8.33333	500	5.982	9.02	9.808	9.482	10.053	10.337	9.702	9.014	8.476	8.802	8.675	9.833	17.114	15.767	18.582	19.488	18.202	17.765	21.814	21.753	23.704	23.953	23.79	21.925	19.243	15.624	17.347	16.906	16.641	16.767	18.506	19.186	20.035	20.047	19.616	20.716	31.38	26.906	27.255	26.92	26.659	26.659	27.645	29.669	28.731	28.775	29.431	31.473
8.66667	520	6.053	9.114	9.939	9.88	10.069	10.351	9.802	8.888	8.327	8.678	8.575	9.757	17.486	16.127	19.057	20.371	19.475	18.559	22.649	22.49	24.327	25.125	24.761	22.741	19.814	16.043	18.118	17.559	17.492	17.349	19.139	19.884	20.855	20.973	20.41	21.788	33.927	29.106	29.42	28.931	28.922	28.888	29.802	31.859	30.884	31.008	31.653	33.808
9	540	6.008	9.2	10.141	9.978	10.273	10.365	9.988	9.116	8.643	9.053	8.924	10.186	18.131	16.767	19.575	21.367	20.518	19.88	23.949	23.614	25.614	26.222	25.902	23.594	20.933	16.833	19.073	18.3	18.416	18.516	20.014	20.794	21.635	21.837	21.59	22.892	36.276	31.102	31.461	31.067	31.255	30.898	32.02	34.386	33.129	33.212	34.106	36.339
9.33333	560	5.927	9.28	10.098	9.551	9.931	10.21	10.171	9.218	8.527	9.024	8.639	9.763	18.447	17.137	19.882	22.647	21.567	21.051	25.337	25.288	27.329	27.918	27.478	24.51	21.527	17.227	19.427	19.549	19.553	19.573	21.457	22.008	22.924	23.131	22.992	24.318	38.847	33.665	34.018	33.616	33.769	33.549	34.649	36.875	35.6	35.365	36.473	38.682
9.66667	580	5.996	9.261	10.208	9.775	10.122	10.331	10.506	9.492	8.831	9.476	8.9	10.439	18.9	17.478	20.363	23.859	22.543	22.261	26.376	26.265	28.355	28.937	28.555	25.704	22.465	17.79	20.6	20.343	20.345	20.457	22.396	22.988	23.971	24.008	23.841	25.782	41.688	36.249	36.618	36.329	36.388	36.102	37.363	39.735	38.255	38.114	39.084	42.116
10	600	5.986	9.575	10.408	9.751	10.412	10.561	10.973	9.959	9.065	10.388	9.48	10.933	20.194	18.68	21.212	24.882	23.829	23.41	27.888	27.782	29.702	30.337	29.945	26.798	23.827	18.853	21.235	21.276	21.514	21.714	23.384	24.043	24.869	24.99	24.894	26.757	45.31	39.457	39.808	39.463	39.384	39.204	40.316	42.89	41.357	41.28	42.145	45.38
10.3333	620	5.947	9.673	10.81	9.918	10.482	10.631	11.067	10.435	9.469	12.233	10.227	12.271	21.006	19.376	22.022	25.943	24.851	24.561	29.276	28.786	30.675	30.718	30.608	27.824	24.796	19.841	22.161	22.278	22.565	22.604	24.29	25.043	25.825	25.847	25.892	27.935	48.675	42.318	42.725	42.32	42.596	42.39	43.451	46.088	44.645	44.555	45.569	49.127
10.6667	640	5.912	9.733	10.81	9.912	10.441	10.547	11.18	10.89	9.82	13.337	11.969	13.984	21.657	19.878	22.461	27.296	26.118	25.755	30.114	29.267	31.361	27.992	31.698	29.227	25.906	20.506	23.214	23.439	23.596	23.802	25.408	26.118	27.055	27.118	27.196	29.133	52.48	45.735	45.957	45.886	45.955	45.745	46.92	49.653	47.839	47.794	48.849	52.682
11	660	5.996	9.806	11.029	9.894	10.647	10.745	11.618	11.318	10.341	13.251	12.718	14.816	23.043	20.906	23.363	28.157	27.245	26.973	30.808	30.369	32.72	29.335	32.573	30.884	26.62	21.322	23.761	24.798	24.502	24.651	26.506	27.22	28.092	28.122	28.231	30.506	56.145	49.363	49.657	49.625	49.382	49.075	50.512	53.31	51.59	51.449	52.537	56.525
11.3333	680	5.992	9.865	11.163	10.151	10.653	10.565	11.865	11.72	10.763	13.335	12.686	14.945	23.604	21.443	24.027	29.457	28.339	28.21	31.157	31.033	32.916	31.029	32.584	32.561	28.031	21.947	24.555	24.824	25.749	25.688	27.657	28.3	29.167	29.106	29.4	31.547	60.91	53.035	53.461	53.351	53.167	52.729	54.339	57.347	55.633	55.335	56.649	60.806
11.6667	700	5.984	10.127	11.38	10.059	10.753	10.896	12.224	11.99	11.38	13.353	12.714	15.09	24.822	22.467	25.086	30.665	29.761	28.978	30.19	29.957	31.575	32.798	33.886	34.449	28.986	22.618	25.38	25.91	26.935	26.725	28.045	28.943	29.767	29.976	30.135	32.437	65.745	57.216	57.288	57.32	57.516	56.771	58.527	61.41	59.573	59.418	60.696	65.19
12	720	6.033	10	11.504	9.967	10.741	10.751	12.347	12.016	11.843	13.29	12.727	15.186	25.494	22.961	25.549	31.453	30.498	30.263	31.947	31.78	33.306	34.702	35.773	36.553	29.643	23.584	26.522	25.963	27.649	27.447	29.145	29.945	30.79	30.68	30.827	33.178	71.539	62.276	62.455	62.316	62.329	61.822	63.402	66.784	64.729	64.486	65.812	70.698
12.3333	740	5.988	10.029	11.533	10	10.694	10.853	12.357	11.984	12.088	13.5	12.818	15.196	25.931	23.8	26.218	31.892	31.006	30.869	33.896	33.455	35.171	36.906	37.663	38.461	31.237	24.541	27.282	25.602	28.292	28.106	29.022	30.239	31.455	30.873	31.122	33.151	77.084	67.057	67.369	67.4	67.655	66.843	68.5	71.929	69.784	69.651	71.108	76.169
12.6667	760	5.884	10.065	11.437	9.798	10.598	10.998	12.296	11.953	11.975	13.449	12.841	15.237	26.671	24.357	26.873	32.808	29.773	28.784	35.637	35.398	37.09	38.82	40.118	40.222	32.257	25.445	28.367	26.463	28.792	29.031	29.088	29.376	30.055	30.941	31.445	34.625	81.71	71.106	71.637	71.5	71.62	71.202	72.81	76.455	74.306	73.947	75.325	80.586
13	780	5.871	10.18	11.555	9.763	10.661	10.988	12.286	11.894	11.912	13.363	12.79	15.206	28.227	25.369	27.888	32.929	30.812	30.2	37.578	37.482	39.008	40.782	41.42	42.584	32.975	26.094	29.016	27.959	27.904	29.471	30.739	30.922	31.622	32.622	33.157	36.524	85.559	74.773	75.137	75.22	75.157	74.79	76.647	80.151	77.92	77.657	79.28	84.535
13.3333	800	5.996	10.278	11.822	9.818	10.849	11.171	12.286	11.929	11.935	13.435	12.875	15.278	29.124	26.322	28.706	34.378	33.018	31.916	39.649	39.253	40.733	43.014	43.765	44.698	33.98	27.225	30.184	29.667	29.608	30.545	32.731	32.782	33.441	34.484	35.165	38.508	88.414	77.435	78.312	78.367	78.198	78.098	79.643	83.476	81.331	80.727	82.571	87.929
13.6667	820	5.931	10.335	11.778	10.002	11.025	11.227	12.198	11.888	11.865	13.42	12.745	15.227	29.698	26.904	29.598	36.375	34.798	33.743	41.539	41.149	42.633	45.108	45.614	46.994	34.524	28.063	30.649	31.125	31.259	32.178	34.704	34.939	35.314	36.345	36.992	40.639	90.214	79.263	80.304	80.492	80.478	80.137	81.994	85.737	83.653	83.002	84.714	90.073
14	840	5.869	10.494	12.069	10.084	10.729	11.257	12.139	11.924	11.939	13.569	12.873	15.331	29.586	27.253	29.888	38.104	36.696	35.773	43.349	42.851	44.447	47.369	47.267	49.186	35.569	28.99	31.3	33.049	33.176	34.039	36.773	36.727	37.094	38.2	38.788	42.51	92.131	80.861	81.922	81.824	82.147	81.688	83.627	87.502	85.375	84.686	86.318	91.739
14.3333	860	5.98	10.622	12.143	10.169	10.696	11.492	12.106	11.886	12.065	13.567	12.939	15.331	29.165	26.806	29.48	39.72	38.425	37.578	45.376	45.176	46.669	49.669	50.241	51.143	37.057	29.737	32.608	34.676	35.014	35.773	38.476	38.671	39.047	39.927	40.075	43.761	93.865	82.047	83.169	83.276	83.582	83.071	85.073	88.773	87.055	85.837	87.467	93.153
14.6667	880	5.959	10.575	12.255	9.918	10.822	11.539	12.047	11.896	11.918	13.5	12.935	15.3	29.09	27.139	30.239	41.502	40.378	39.435	46.975	46.792	48.273	51.669	52.084	53.818	38.604	30.031	34.057	36.894	37.078	37.765	40.029	40.41	40.878	41.943	42.294	45.884	94.784	83.255	84.316	84.302	84.435	84.188	85.961	89.863	87.675	86.7	88.584	93.567
15	900	5.947	10.639	12.216	9.89	10.645	11.627	12.131	11.967	11.98	13.639	12.961	15.329	30.602	28.486	31.396	42.292	41.48	41.255	49.202	49.004	50.539	54.241	54.155	56.355	40.353	30.631	35.412	38.369	38.727	39.022	42.249	42.318	42.937	44.098	44.486	48.198	95.8	84.055	85.214	85.237	85.482	85.051	86.98	90.412	88.551	87.298	89.337	94.392
15.3333	920	5.92	10.71	12.382	9.841	10.796	11.806	12.157	11.892	12.008	13.631	13.016	15.324	31.814	29.661	32.647	44.602	43.269	42.563	51.541	51.241	52.857	56.694	55.888	58.741	41.976	32.404	36.969	40.329	40.339	41.355	44.298	44.367	45.059	45.924	46.635	49.947	96.555	84.971	85.825	85.865	86.094	86.065	87.322	91.2	89.439	87.996	89.808	95.082
15.6667	940	6.004	10.716	12.51	10.067	10.839	11.825	12.237	11.945	11.996	13.596	13.051	15.371	32.959	30.675	33.567	46.041	44.751	44.555	53.718	53.273	54.816	58.851	58.157	61.253	43.286	33.643	38.696	42.018	42.196	42.931	46.359	46.467	46.916	47.755	48.725	51.884	97.273	85.433	86.637	86.684	86.949	86.624	88.227	92.076	89.992	88.671	90.637	95.467
16	960	6.002	10.833	12.618	10.122	10.978	11.855	12.114	11.976	12.104	13.578	13.092	15.367	34.304	31.824	34.629	47.553	46.339	45.943	55.59	55.431	56.902	61.461	60.043	63.537	45.022	35.318	40.088	43.712	43.875	44.704	47.896	48.076	48.861	49.639	50.639	53.594	98.029	86.249	87.176	87.208	87.443	87.353	88.835	92.639	90.773	89.249	91.39	96.004
16.3333	980	5.906	10.975	12.624	9.967	11.104	12.151	12.165	12.071	12.096	13.688	13.147	15.453	35.527	32.255	35.484	49.133	48.425	47.89	58.284	57.686	59.145	63.527	62.351	66.086	46.337	36.633	41.78	45.725	45.9	46.657	49.984	50.373	51.027	52.12	52.79	55.504	98.651	86.924	87.724	87.976	87.931	87.671	89.316	93.225	91.255	89.812	91.751	96.271
16.6667	1000	5.941	11.231	12.578	10.088	11.024	12.259	12.257	12.024	12.116	13.712	13.029	15.373	35.918	31.765	34.912	50.704	50.067	49.567	60.241	59.616	61.361	65.625	64.62	68.4	48.031	38.047	42.943	47.527	47.722	48.688	52.406	52.384	53.192	54.406	54.975	56.92	99.11	87.153	88.329	88.214	88.535	88.325	89.788	93.557	91.618	90.088	91.841	96.847
17	1020	5.955	11.161	12.651	10.063	10.994	12.322	12.149	12.106	12.131	13.61	13.084	15.445	36.365	33.008	36.014	52.357	51.8	51.175	62.294	61.478	63.294	68.306	67.275	70.414	49.422	39.465	44.269	49.371	49.478	50.373	54.233	54.092	54.912	56.314	57.163	59.322	99.473	87.39	88.606	88.467	88.659	88.476	90.045	93.847	91.91	90.425	92.275	96.931
17.3333	1040	5.841	11.388	12.627	10.357	11.129	12.422	12.114	11.996	12.129	13.649	13.033	15.412	37.696	34.369	37.271	54.433	53.771	53.016	64.49	63.808	65.735	70.392	69.257	72.853	50.169	40.602	45.865	51.657	51.347	52.306	56.355	56.669	57.486	58.429	59.429	61.445	100.216	87.829	89.129	89.047	89.21	89.012	90.4	94.155	92.349	90.837	92.812	97.427
17.6667	1060	5.857	11.614	12.649	10.188	11.22	12.527	12.22	11.988	12.176	13.716	13.073	15.408	39.261	35.669	38.598	56.241	55.602	55.306	66.624	66.488	68.165	73.008	71.875	74.955	51.845	42.404	47.739	53.739	53.396	54.553	58.457	58.912	59.576	60.449	61.655	64.076	100.314	88.261	89.318	89.269	89.427	89.18	90.606	94.647	92.663	90.967	93.098	97.631
18	1080	5.873	11.58	12.637	10.429	11.353	12.692	12.267	12.039	12.175	13.818	13.131	15.51	40.437	36.841	39.82	57.849	57.737	56.906	68.982	68.065	69.986	74.978	74.118	76.931	53.824	43.822	49.067	55.941	55.5	56.459	60.684	60.555	61.504	62.716	64.037	66.875	100.984	88.776	89.716	89.484	89.714	89.761	91.155	95.061	93.1	91.355	93.596	98.092
18.3333	1100	5.924	11.692	12.563	10.571	11.378	12.631	12.267	12.155	12.261	13.755	13.141	15.461	41.755	37.982	40.727	59.729	59.684	59.086	70.712	70.424	72.216	76.837	75.61	78.675	55.945	45.333	50.62	58.031	57.665	58.72	62.847	62.437	63.678	65.122	66.388	69.416	101.053	88.749	90.12	89.667	89.951	89.947	91.467	95.498	93.071	91.61	93.58	98.308
18.6667	1120	5.951	11.833	12.408	10.598	11.606	12.682	12.361	12.133	12.243	13.849	13.198	15.618	42.955	39.01	41.924	62.051	61.408	60.839	72.6	72.192	73.906	78.331	77.206	80.571	57.816	46.849	52.216	59.912	59.553	60.49	64.99	64.282	66.129	67.531	68.473	70.939	101.384	89.12	90.257	90.076	90.278	90.067	91.62	95.606	93.359	91.931	93.731	98.525
19.3333	1160	5.89	12.131	12.414	10.6	12.08	12.771	12.327	12.114	12.304	13.743	13.284	15.402	45.614	41.22	43.839	65.606	65.376	64.953	76.369	75.927	77.763	81.818	80.706	83.41	61.114	50.043	55.69	63.875	63.72	64.7	69.504	68.69	70.322	71.584	73.108	75.775	102.065	89.551	90.994	90.555	90.737	90.608	92.304	96.145	94.167	92.443	94.398	98.978
19.6667	1180	5.89	12.155	12.337	10.398	12.106	12.708	12.408	12.178	12.247	13.812	13.235	15.359	46.543	42.216	44.998	67.486	67.033	67.057	78.192	77.853	79.512	82.978	81.869	84.886	62.822	51.441	57.22	66.061	65.827	66.714	71.571	70.935	72.602	74.016	75.667	78.727	102.202	89.712	91.116	90.451	90.782	90.698	92.239	96.208	94.243	92.635	94.575	99.318
20	1200	5.998	12.365	12.457	10.61	12.341	12.845	12.475	12.216	12.28	13.841	13.237	15.539	48.271	43.541	46.249	69.224	69.027	69.135	80.106	79.327	81.335	84.304	83.12	86.406	65.422	53.114	59.378	68.355	68.202	68.953	73.488	73.471	75.125	76.675	77.859	80.675	102.625	90.224	91.622	91.018	91.439	91.2	92.782	96.755	94.58	93.112	95.037	99.702
20.3333	1220	5.984	12.461	12.324	10.91	12.451	12.708	12.422	12.153	12.347	13.824	13.296	15.604	49.563	44.59	47.12	70.935	70.582	71.163	81.192	80.931	82.812	85.425	83.941	87.398	67.99	54.541	61.104	70.788	70.437	71.096	76.325	75.606	77.324	78.402	79.914	82.684	102.857	90.267	91.733	91.316	91.31	91.32	92.841	96.653	94.863	93.296	94.871	100.037
21	1260	5.996	12.402	12.273	11.051	12.598	12.661	12.435	12.273	12.318	13.863	13.312	15.651	51.884	47.071	49.718	75.647	74.565	75.002	83.592	83.625	85.388	87.106	85.949	88.767	71.567	58.578	64.618	74.935	74.243	75.167	79.237	79.653	81.435	82.198	83.882	86.998	103.404	90.978	92.259	91.788	91.855	91.498	93.378	97.327	95.09	93.71	95.835	100.324
21.3333	1280	5.92	12.308	12.282	11.382	12.49	12.529	12.388	12.192	12.325	13.833	13.225	15.698	53.373	48.582	51.041	77.651	76.42	76.612	84.673	84.578	86.416	88.065	86.941	89.796	73.402	60.286	66.704	77.206	75.796	76.637	80.773	81.547	83.265	84	85.543	88.769	103.469	90.982	92.271	91.804	92.063	91.967	93.637	97.28	95.349	93.69	95.767	100.439
21.6667	1300	5.982	12.39	12.212	11.431	12.461	12.547	12.402	12.2	12.333	13.837	13.275	15.649	54.337	49.708	52.145	79.171	78.406	78.396	85.573	85.237	87.108	88.702	87.598	90.416	75.106	61.686	68.294	78.829	77.843	77.798	82.42	83.008	84.765	85.296	86.89	89.212	103.739	91.175	92.569	92.175	92.192	91.941	93.588	97.598	95.698	93.896	95.947	100.641
22	1320	5.951	12.363	12.265	11.727	12.51	12.482	12.378	12.29	12.406	14	13.516	15.851	56.2	51.092	53.312	80.084	80.176	80.324	86.516	85.761	88.353	88.841	87.8	91.233	77.229	63.912	70.222	80.622	79.675	79.8	83.729	84.31	85.998	86.333	87.929	90.576	103.924	91.237	92.733	92.357	92.463	92.261	93.861	97.671	95.527	93.843	95.902	100.798
22.3333	1340	5.945	12.388	12.263	11.988	12.4	12.596	12.396	12.259	12.449	14.073	13.494	15.876	57.657	52.902	55.041	82.171	81.608	81.888	87.118	86.935	89.225	89.808	88.739	91.818	80.067	65.449	72.541	82.251	81.118	81.384	85.01	85.443	87.224	87.414	89.343	91.739	104.108	91.706	92.724	92.51	92.551	92.396	94	97.62	95.825	94.241	96.363	101.047
22.6667	1360	5.931	12.316	12.32	12.025	12.412	12.555	12.484	12.349	12.406	14.029	13.59	15.969	58.696	53.814	56.133	83.367	82.949	83.325	87.437	87.482	89.453	90.188	88.82	91.829	81.949	66.543	73.906	83.302	82.278	82.641	85.816	86.416	88.073	87.975	89.876	92.939	104.235	91.659	93.314	92.502	92.735	92.684	94.194	97.931	95.831	94.547	96.222	101.055
23	1380	5.869	12.39	12.284	12.437	12.378	12.553	12.425	12.251	12.457	14.102	13.661	16.049	60.822	55.673	57.825	85.041	84.363	84.665	88.494	88.312	90.276	90.641	89.184	92.59	84.249	69.2	76.231	84.406	83.461	83.692	86.702	87.471	89.131	88.941	91.192	94.112	104.445	91.878	93.237	92.79	92.994	92.682	94.294	97.961	95.896	94.288	96.392	101.335
23.3333	1400	5.843	12.312	12.298	12.476	12.437	12.653	12.506	12.347	12.457	14.235	13.712	16.012	62.584	56.92	59.002	86.006	85.557	86.086	88.743	88.778	90.367	91.041	89.139	93.249	85.941	71.32	78.061	85.61	84.669	84.91	87.394	88.257	89.969	89.855	91.712	94.292	104.524	91.863	93.19	92.637	93.122	92.82	94.051	98.143	95.845	94.5	96.545	101.153
23.6667	1420	5.975	12.296	12.343	12.694	12.543	12.714	12.508	12.251	12.504	14.243	13.773	16.112	64.114	58.655	60.506	87.584	86.576	87.025	88.935	88.963	90.724	91.284	89.843	93.212	87.449	72.555	79.461	86.61	85.439	86.047	88.192	88.745	90.859	90.427	92.524	94.547	104.904	92.278	93.445	92.8	93.184	92.998	94.494	98.384	96.227	94.943	96.955	101.724
24	1440	5.978	12.133	12.38	12.9	12.535	12.741	12.573	12.384	12.514	14.31	13.871	16.341	65.998	60.471	62.522	88.641	87.898	88.159	89.704	89.645	91.184	91.845	89.965	93.782	89.475	74.355	81.2	87.68	86.451	86.688	88.771	89.696	91.475	91.088	93.157	95.459	104.971	92.261	93.671	93.149	93.422	93.224	94.475	98.561	96.449	94.976	97.124	101.969
24.3333	1460	5.994	12.188	12.318	12.912	12.598	12.61	12.569	12.322	12.561	14.347	13.922	16.247	68.216	62.2	64.11	89.384	88.545	88.725	90.027	89.702	91.531	91.935	90.237	93.833	91.333	75.886	82.798	88.116	87.027	87.398	89.541	89.92	92.006	91.682	93.869	96.059	105.053	92.494	93.696	93.386	93.335	93.233	94.559	98.596	96.59	95.216	97.069	101.937
24.6667	1480	5.916	12.024	12.459	12.92	12.68	12.78	12.696	12.4	12.598	14.504	14.045	16.531	69.729	63.331	65.5	89.729	89.131	89.465	90.304	89.943	91.696	92.014	90.435	94.265	93.224	77.725	84.169	88.704	87.559	88.175	89.729	90.814	92.676	92.102	94.247	96.861	105.263	92.635	93.712	93.269	93.72	93.604	94.598	98.596	96.596	95.463	97.396	102.214
25	1500	5.973	11.988	12.39	12.825	12.62	12.794	12.555	12.429	12.545	14.6	14.147	16.537	71.529	65.406	67.2	90.514	90.098	90.2	90.669	90.322	92.204	92.486	91.112	94.79	94.194	79.445	85.347	89.282	88.196	88.653	90.404	91.139	93.453	92.594	94.618	97.418	105.339	92.582	93.929	93.504	93.745	93.467	94.922	98.804	96.665	95.392	97.416	102.112
25.3333	1520	5.875	12.033	12.384	12.686	12.602	12.653	12.651	12.388	12.478	14.602	14.22	16.594	73.461	66.712	68.831	90.916	90.812	91.461	91.449	90.482	92.543	92.733	91.6	95.251	95.094	81.165	86.537	89.771	89.212	89.653	91.163	91.865	93.767	92.945	94.806	97.947	105.529	92.798	94.084	93.592	93.655	93.592	94.731	98.78	96.58	95.39	97.665	102.608
25.6667	1540	5.906	12.025	12.275	12.725	12.573	12.596	12.475	12.433	12.555	14.673	14.255	16.649	75.416	68.475	70.508	91.657	91.118	91.569	91.737	90.953	92.965	93.004	91.82	95.427	96.035	82.745	87.68	90.512	89.159	89.688	91.271	92.224	93.986	93.302	95.025	98.071	105.318	92.722	94.224	93.592	94.11	93.506	94.886	98.992	96.553	95.761	97.682	102.735
26	1560	5.867	11.861	12.349	12.625	12.635	12.641	12.616	12.38	12.514	14.725	14.212	16.755	76.696	70.098	72.057	91.975	91.59	91.784	91.716	90.986	93.137	93.351	91.684	95.373	97.043	83.508	88.251	90.516	89.78	90.298	91.582	92.359	93.947	93.592	94.965	98.086	105.427	92.833	94.135	93.72	93.988	93.712	95.02	98.863	96.653	95.931	97.904	102.598
26.3333	1580	5.914	12.094	12.467	12.684	12.784	12.763	12.663	12.418	12.592	14.947	14.445	16.763	79.325	71.873	73.622	92.553	92.116	92.588	92.061	91.502	93.596	93.557	91.984	95.896	98.598	84.133	89.08	91.225	90.351	91.045	92.237	92.739	94.418	93.996	95.371	98.624	105.9	93.12	94.602	93.81	93.984	94.104	95.204	98.929	97.075	96.137	97.925	102.949
26.6667	1600	5.914	12.104	12.498	12.659	12.655	12.894	12.684	12.375	12.676	14.857	14.535	16.769	80.482	72.984	75.027	93.01	92.671	92.969	92.459	91.733	93.896	94.153	92.504	96.053	98.916	84.871	89.739	91.518	90.608	91.218	92.331	93.306	94.447	94.871	95.563	99.108	106.014	93.237	94.504	94.075	94.384	93.867	95.147	99.118	97.116	96.251	98.165	103.143
27	1620	5.922	12.169	12.602	12.643	12.641	12.861	12.724	12.512	12.62	14.988	14.582	16.851	81.994	74.657	76.398	93.471	93.096	93.496	92.706	92.267	94.188	94.318	92.812	96.461	99.296	85.902	90.186	92.204	91.161	91.518	92.998	93.631	94.894	94.867	95.682	99.741	106.171	93.339	94.675	94.108	94.476	94.259	95.355	99.355	97.324	96.341	98.31	103.288
27.3333	1640	5.922	12.169	12.582	12.775	12.72	12.898	12.757	12.555	12.604	14.976	14.439	16.935	83.394	76.141	77.624	93.486	93.41	93.651	92.7	91.969	94.192	94.212	92.486	96.725	99.39	86.324	90.667	92.037	91.204	91.796	92.81	93.865	94.784	94.931	95.9	100.094	105.906	93.512	94.692	94.131	94.235	94.306	95.433	99.3	97.52	96.818	98.492	103.622
27.6667	1660	6.018	12.151	12.549	12.773	12.716	12.839	12.649	12.514	12.694	15.102	14.678	17.041	85.308	77.543	78.969	94.245	94.073	94.273	93.318	92.627	94.625	94.757	92.949	97.124	100.369	86.992	91.437	92.808	91.702	92.129	93.482	94.384	95.502	95.11	95.957	100.92	106.31	93.349	94.692	94.329	94.624	94.361	95.68	99.678	97.48	96.749	98.643	103.541
28	1680	5.925	12.137	12.604	12.688	12.72	12.873	12.651	12.578	12.647	15.145	14.627	17.122	86.763	78.425	80.345	94.124	93.882	94.425	93.149	92.484	94.537	94.89	93.298	96.945	101.086	87.635	91.667	92.682	91.876	92.38	93.443	94.484	95.673	95.033	95.804	101.157	106.029	93.416	94.645	94.49	94.647	94.335	95.531	99.822	97.557	96.633	98.759	103.698
28.3333	1700	5.861	12.047	12.653	12.808	12.696	12.788	12.696	12.535	12.735	15.155	14.712	17.069	87.861	79.825	81.335	94.525	94.11	94.445	93.473	92.667	94.731	94.614	93.118	97.084	101.641	88.155	91.863	92.886	91.971	92.582	93.737	94.494	95.655	94.894	95.824	101.267	106.453	93.473	94.825	94.231	94.367	94.29	95.512	99.684	97.424	96.747	98.841	103.561
28.6667	1720	6.088	12.302	12.627	12.835	12.802	12.829	12.755	12.62	12.684	15.249	14.884	17.2	89.914	80.816	82.741	95.065	94.837	95.251	93.949	93.304	95.078	95.11	93.535	97.402	102.759	88.637	92.369	93.175	92.575	93.116	94.259	95.222	96.325	95.257	96.386	101.435	106.394	93.455	94.69	94.416	94.533	94.422	96.047	99.922	97.612	96.867	98.867	103.955
29	1740	5.965	12.09	12.653	12.849	12.81	12.894	12.716	12.496	12.714	15.282	14.88	17.216	90.767	81.994	84	95.222	94.653	95.19	93.876	93.171	95.241	95.165	93.476	97.231	102.82	88.971	92.524	93.622	92.751	93.124	94.41	95.257	96.61	95.429	96.667	101.324	106.51	93.655	94.965	94.514	94.645	94.571	95.984	99.918	97.729	97.147	99.125	103.965
29.3333	1760	6.006	12.224	12.651	12.837	12.747	12.904	12.902	12.655	12.767	15.304	14.982	17.312	92.384	83.559	85.037	96.157	95.175	95.931	94.347	93.594	95.684	95.194	93.706	97.539	103.053	89.647	93.073	94.263	93.169	93.814	94.72	95.557	96.708	95.747	97.304	102.006	106.812	93.827	95.173	94.506	94.82	94.714	95.822	99.818	97.922	96.973	99.188	104.176
29.6667	1780	5.998	12.165	12.753	12.886	12.741	12.925	12.7	12.608	12.725	15.224	14.91	17.363	93.147	84.257	85.9	95.873	95.349	95.765	94.124	93.441	95.52	95.078	93.4	97.496	102.535	89.894	93.02	93.957	93.18	93.586	94.586	95.429	96.78	95.965	97.22	102.286	106.488	93.804	95.149	94.553	94.957	94.451	96.135	100.063	97.698	97.222	99.143	104.3
30	1800	5.865	12.182	12.645	12.818	12.741	12.8	12.8	12.616	12.72	15.39	15.057	17.463	94.592	85.424	86.876	96.339	95.682	96.194	94.435	93.651	95.718	95.371	93.667	97.602	102.778	90.439	93.449	94.533	93.606	93.988	95.051	95.92	97.261	96.263	97.416	101.961	106.747	93.867	95.147	94.625	94.68	94.806	96.22	100.157	98.131	97.486	99.386	104.347
30.3333	1820	5.876	12.051	12.588	12.833	12.671	12.673	12.869	12.637	12.763	15.331	14.988	17.353	95.19	86.171	87.973	96.337	95.676	96.161	93.994	93.29	95.406	95.29	93.776	97.322	102.565	90.49	93.357	94.245	93.763	94.135	94.922	95.806	97.051	96.237	97.727	102.545	106.873	94.055	95.361	94.79	94.984	94.867	96.273	100.249	97.975	97.655	99.443	104.478
30.6667	1840	5.922	12.153	12.639	12.863	12.757	12.875	12.878	12.712	12.71	15.5	15.016	17.369	96.575	87.231	88.718	96.314	95.857	96.718	94.484	93.608	95.647	95.259	93.79	97.841	103.063	90.771	93.682	94.671	93.804	94.357	95.414	96.349	97.461	96.465	97.598	102.373	106.943	93.927	95.194	94.843	94.984	94.922	96.447	100.355	98.222	97.463	99.506	104.561
31	1860	5.914	12.357	12.741	12.967	12.888	13.08	12.916	12.684	12.8	15.527	15.039	17.463	97.414	87.959	89.371	96.824	96.088	96.71	94.482	93.729	95.71	95.376	93.686	97.692	103.48	90.839	93.651	94.796	94.376	94.673	95.776	96.582	97.527	96.467	98.051	102.633	106.757	94.084	95.39	95.012	94.951	94.955	96.271	100.406	98.106	97.659	99.647	104.624
31.3333	1880	6.006	12.296	12.782	13.047	12.937	13.106	12.994	12.716	12.918	15.508	15.176	17.59	98.39	89.145	90.424	97.343	96.661	97.078	94.718	93.824	96.249	95.865	94.275	98.029	103.914	91.161	94.075	95.118	94.496	94.849	95.894	96.537	97.837	97.251	98.165	103.461	107.269	94.331	95.622	95.065	95.112	95.004	96.547	100.616	98.547	98.078	99.669	104.908
31.6667	1900	5.998	12.263	12.7	13.02	12.955	12.927	13.075	12.714	12.912	15.565	15.331	17.561	99.3	89.563	91.165	97.41	96.916	97.476	94.959	94.135	96.112	95.902	94.284	98.294	104.371	91.335	94.571	95.5	94.571	95.004	96.218	96.924	98.092	97.218	98.424	103.414	107.031	94.284	95.684	94.996	95.318	95.306	96.833	100.661	98.467	97.927	99.976	104.941
32	1920	5.898	12.22	12.733	13.016	12.853	12.947	13.027	12.812	12.88	15.6	15.18	17.557	99.651	89.98	91.684	97.329	96.641	97.21	94.412	93.747	95.902	95.496	94.106	97.804	104.253	91.441	94.541	95.324	94.675	94.973	95.975	96.727	97.849	96.912	98.298	103.075	107.137	94.253	95.541	94.92	95.204	95.129	96.818	100.582	98.457	97.904	100.11	104.859
32.3333	1940	5.986	12.288	12.845	13.035	12.978	13.184	13.004	12.786	12.947	15.667	15.302	17.598	100.618	90.79	92.578	97.331	96.949	97.625	94.573	94.041	96.029	96.014	94.302	98.033	104.751	92.049	94.729	95.439	94.792	95.345	96.218	97.051	98.239	97.482	98.729	103.322	107.286	94.469	95.692	95.076	95.451	95.233	96.567	100.8	98.79	98.365	100.225	104.906
32.6667	1960	5.949	12.475	12.814	13.104	12.975	13.173	13.014	12.714	12.898	15.584	15.259	17.814	101.267	91.278	92.922	97.339	97.073	97.588	94.312	93.635	95.729	95.618	93.939	97.824	104.81	92.037	94.586	95.412	94.794	95.125	96.118	96.988	98.157	97.292	98.606	103.3	107.192	94.371	95.639	95.1	95.259	95.143	96.533	100.824	98.671	98.122	100.135	104.955
33	1980	6.024	12.316	12.81	13.108	12.929	13.065	13.075	12.831	12.959	15.741	15.369	17.798	102.022	91.865	93.794	97.643	97.612	97.825	94.959	94.186	96.465	95.951	94.165	98.273	105.145	92.192	95.21	95.996	95.006	95.592	96.259	97.218	98.798	97.639	98.947	103.867	107.412	94.457	95.843	95.357	95.282	95.327	96.804	100.937	98.835	98.251	100.251	105.022
33.3333	2000	5.924	12.304	12.89	13.278	12.992	13.102	13.153	12.798	13.008	15.643	15.335	17.541	102.812	92.3	94.025	97.594	97.237	97.922	95.4	94.384	96.639	96.053	94.402	98.424	105.21	92.371	95.092	96.069	95.459	95.722	96.567	97.473	98.586	97.71	99.139	103.459	107.475	94.502	95.904	95.318	95.584	95.19	97.018	101.118	98.935	98.357	100.308	105.449
33.6667	2020	5.914	12.402	12.99	13.125	12.978	13.145	13.071	12.81	13.049	15.688	15.427	17.875	103.039	92.975	94.122	97.69	97.239	97.912	95.18	94.392	96.229	96.296	94.102	98.6	105.376	92.471	95.304	95.769	95.461	96.135	96.559	97.4	98.714	97.694	99.188	103.322	107.443	94.578	95.839	95.29	95.571	95.273	96.914	100.978	98.635	98.186	100.276	105.29
34	2040	5.933	12.286	12.971	13.214	12.996	13.231	13.178	12.89	12.916	15.931	15.459	17.859	103.278	93.214	94.647	97.769	97.176	97.769	95.28	94.459	96.651	96.139	94.496	98.357	105.643	92.42	95.351	96.155	95.451	95.965	96.786	97.573	98.853	97.965	99.39	103.867	107.645	94.663	95.976	95.363	95.543	95.298	97.124	101.253	98.998	98.533	100.441	105.414
34.3333	2060	5.875	12.29	12.876	13.137	12.994	13.047	13.143	12.863	13.008	15.906	15.557	17.816	104.063	93.753	95.239	97.857	97.327	97.818	95.333	94.463	96.712	96.533	94.575	98.833	106.129	92.976	95.876	96.39	95.684	96.239	96.896	97.643	98.914	97.863	99.367	103.776	107.72	94.731	95.941	95.455	95.567	95.369	97.184	100.998	99.112	98.686	100.629	105.571
34.6667	2080	5.992	12.516	13.078	13.233	13.137	13.247	13.082	12.767	13.139	15.906	15.469	17.675	103.996	93.62	95.175	97.878	97.439	98.233	95.565	94.912	97.006	96.512	94.641	99.137	106.08	92.945	95.571	96.159	95.918	96.451	97.027	97.973	98.896	97.58	99.363	103.933	107.492	94.808	96.171	95.4	95.533	95.441	97.153	101.139	99.108	98.625	100.694	105.704
35	2100	5.982	12.476	13.057	13.369	13.057	13.335	13.137	12.855	13.047	15.871	15.433	17.72	104.051	93.845	95.318	97.708	97.227	97.971	95.373	94.7	96.673	96.386	94.592	98.867	105.925	92.837	95.759	96.133	95.916	96.516	97.065	97.822	99.035	98.137	99.329	103.737	107.688	94.716	95.886	95.473	95.794	95.225	97.251	101.341	98.908	98.498	100.52	105.555
35.3333	2120	5.971	12.643	13.153	13.404	13.096	13.302	13.233	12.808	13.139	15.986	15.533	17.745	104.637	94.576	96.29	98.12	97.657	98.124	95.504	95.082	96.945	96.947	95.249	99.294	106.525	93.459	96.051	96.686	95.98	96.396	96.875	97.922	99.035	98.12	99.788	103.751	107.745	94.641	96.108	95.629	95.667	95.396	97.286	101.412	99.335	98.675	100.833	105.853
35.6667	2140	5.965	12.516	13.035	13.284	13.039	13.206	13.212	12.778	13.104	16.09	15.58	18.027	105.402	94.886	96.463	98.096	97.784	98.441	95.745	95.216	97.171	97.088	95.359	99.345	106.761	93.41	96.273	96.792	96.02	96.629	97.218	97.884	99.257	98.257	99.498	104.182	108.02	94.931	96.284	95.625	95.933	95.502	97.569	101.369	99.365	98.724	100.741	105.882
36	2160	5.984	12.48	13.073	13.3	13.237	13.404	13.261	12.976	13.169	16.143	15.594	18.031	105.88	95.227	96.906	98.543	98.053	98.604	95.516	95.261	97.233	97.292	95.729	99.52	107.243	94.012	96.482	96.841	96.169	96.516	97.324	98.112	99.584	98.341	99.924	104.247	108.039	95.12	96.58	95.814	95.908	95.796	97.68	101.641	99.512	99.202	101.324	106.049
36.3333	2180	5.943	12.424	13.073	13.375	13.202	13.271	13.314	12.912	13.19	16.2	15.525	17.861	106.08	95.502	96.896	98.541	98.237	98.555	96.11	95.2	97.384	97.482	95.631	99.971	107.229	93.727	96.775	96.916	96.431	96.759	97.512	98.378	99.624	98.433	99.735	104.651	108.159	95.031	96.384	95.647	96.022	95.641	97.673	101.833	99.702	99.167	101.024	106.049
36.6667	2200	6	12.424	13.022	13.375	13.225	13.202	13.337	12.914	12.992	16.161	15.631	17.978	106.086	95.853	97.237	98.467	98.429	98.761	96.004	95.31	97.486	97.363	95.986	99.898	107.451	94.004	96.731	97.037	96.296	96.755	97.471	98.398	99.633	98.298	100.02	104.643	107.969	95.161	96.635	95.657	95.767	95.625	97.696	101.757	99.498	99.045	100.998	106.235
37	2220	5.957	12.422	13.139	13.508	13.245	13.325	13.443	12.951	13.196	16.149	15.833	17.975	106.5	95.988	97.727	98.424	98.31	98.822	96.2	95.306	97.471	97.48	96.102	100.098	107.61	94.31	97.224	97.269	96.557	97.208	97.59	98.49	99.678	98.59	99.884	104.906	108.451	95.312	96.508	95.718	96.112	96.006	97.867	101.892	99.484	99.206	101.331	106.382
37.3333	2240	5.931	12.465	13.127	13.373	13.278	13.39	13.306	13.024	13.131	16.249	15.755	18.259	106.465	96.012	97.306	98.298	98.118	98.833	96.347	94.998	97.375	97.588	96.004	100.11	107.561	93.941	96.759	96.99	96.537	97.282	97.567	98.455	99.324	98.329	99.943	104.61	108.141	95.245	96.704	95.555	95.957	95.937	97.782	101.776	99.663	99.298	101.265	106.288
37.6667	2260	6.004	12.575	13.31	13.431	13.32	13.48	13.294	12.924	13.1	16.275	15.747	18.022	106.822	96.243	97.622	98.692	98.473	98.912	96.345	95.678	97.463	97.778	96.208	99.894	107.759	94.469	97.096	97.388	96.422	96.916	97.58	98.473	99.661	98.543	100.259	104.71	108.263	95.259	96.704	95.855	96.018	96.051	97.878	102.194	99.82	99.455	101.467	106.376
38	2280	5.957	12.516	13.222	13.504	13.278	13.39	13.4	12.825	13.124	16.22	15.853	17.996	107.022	96.451	97.747	98.359	98.527	98.796	96.022	95.471	97.72	97.912	96.157	100.004	107.902	94.492	97.286	97.225	96.537	97.045	97.559	98.51	99.806	98.565	100.202	104.594	108.551	95.437	96.518	95.761	95.894	95.837	97.845	101.749	99.757	99.473	101.618	106.22
38.3333	2300	5.896	12.653	13.314	13.68	13.369	13.516	13.396	12.986	13.316	16.329	15.888	18.076	107.255	96.594	98.022	98.463	98.635	99.547	96.131	95.286	97.62	98.029	96.237	100.535	108.371	94.771	97.561	97.616	96.951	97.502	97.892	98.935	99.839	98.702	100.461	104.816	108.288	95.3	96.62	96.039	96.204	95.825	98.061	102.063	99.929	99.551	101.588	106.543
38.6667	2320	5.992	12.633	13.276	13.514	13.404	13.541	13.396	12.939	13.133	16.284	15.882	17.988	107.486	96.973	98.353	98.251	98.802	99.402	96.29	95.52	97.61	98.067	96.637	100.265	108.345	94.716	97.851	97.584	96.633	97.188	97.8	98.655	99.804	98.688	100.453	105.141	108.514	95.276	96.596	96.065	96.145	95.853	97.978	102.278	99.857	99.514	101.41	106.549
39	2340	5.876	12.478	13.218	13.494	13.216	13.473	13.343	12.959	13.21	16.329	15.773	18.125	107.596	96.808	98.398	98.827	99.092	99.582	96.586	95.98	97.875	98.173	96.347	100.661	108.565	94.867	97.822	97.459	97.008	97.567	98.071	98.949	100.045	98.839	100.482	105.198	108.382	95.388	96.675	96.108	96.247	96.076	98.153	102.18	99.933	99.59	101.51	106.667
39.3333	2360	5.976	12.563	13.153	13.561	13.369	13.439	13.349	12.971	13.182	16.508	16.012	18.214	108.259	97.539	98.669	98.871	99.106	99.814	96.696	95.81	98.161	98.261	96.733	100.575	108.531	95.353	97.963	97.714	96.982	97.357	98.29	99.047	100.229	99.104	100.349	105.024	108.614	95.453	96.792	96.186	96.092	96.027	98.225	102.175	100.204	99.494	101.49	106.749
39.6667	2380	5.88	12.731	13.306	13.488	13.367	13.527	13.373	12.89	13.147	16.455	16.014	18.188	108.024	97.612	98.649	98.555	98.567	99.4	96.475	95.918	98.125	98.057	96.692	100.773	108.32	95.4	98.11	97.567	97.01	97.667	98.11	98.931	99.992	99.194	100.351	105.263	108.522	95.502	96.841	96.157	96.229	96.008	97.953	102.339	100.045	99.6	101.712	106.824
40	2400	5.965	12.663	13.355	13.5	13.357	13.469	13.451	12.945	13.202	16.412	15.91	18.216	108.443	97.365	98.978	99.018	99.329	99.796	96.676	95.929	98.304	98.425	96.667	100.582	108.337	95.298	98.106	97.837	97.124	97.706	98.284	99.239	100.512	99.259	100.661	105.704	108.453	95.547	96.553	95.902	96.302	96.2	98.216	102.353	100.092	99.655	101.892	107.004
40.3333	2420	5.863	12.547	13.306	13.488	13.357	13.39	13.445	13.035	13.231	16.473	16.004	18.178	108.459	97.671	99.145	98.861	99.476	99.829	97.155	96.159	98.275	98.184	96.963	100.816	108.496	95.184	97.869	98.041	97.267	97.769	98.539	99.443	100.318	99.435	100.688	105.565	108.412	95.441	96.68	96.043	96.19	96.188	98.122	102.506	100.384	99.831	101.784	106.741
40.6667	2440	5.935	12.678	13.314	13.555	13.39	13.508	13.527	13.004	13.147	16.469	16.082	18.275	108.78	97.851	99.445	99.014	99.631	100.147	97.361	96.602	98.61	98.665	96.853	101.084	108.543	95.496	98.141	98.225	97.533	98.035	98.6	99.424	100.751	99.553	100.925	106.251	108.824	95.845	97.08	96.38	96.441	96.316	98.547	102.445	100.396	99.808	101.988	107.088
41	2460	5.812	12.457	13.398	13.582	13.339	13.571	13.447	12.965	13.188	16.535	16.088	18.22	108.912	98.039	99.465	98.916	99.316	99.606	97.016	96.386	98.21	98.273	96.929	100.496	108.38	95.504	98.227	98.09	97.392	97.763	98.216	99.076	100.404	99.533	101.065	105.449	108.814	95.727	96.916	96.316	96.463	96.096	98.259	102.388	100.312	99.959	101.769	106.894
41.3333	2480	5.927	12.712	13.441	13.6	13.484	13.575	13.427	13.145	13.114	16.547	16.065	18.359	109.049	98.088	99.829	99.051	99.337	100.016	97.367	96.655	98.965	98.473	96.892	100.861	108.457	95.382	98.098	98.298	97.612	98.169	98.555	99.447	100.749	99.606	101.276	105.978	108.8	95.692	96.994	96.135	96.422	96.261	98.486	102.631	100.18	100.006	101.957	106.931
41.6667	2500	5.939	12.682	13.331	13.518	13.469	13.551	13.404	13.067	13.19	16.473	16.104	18.671	109.263	98.547	99.92	98.951	99.108	99.88	97.31	96.416	98.765	98.473	96.876	100.782	108.441	95.555	98.48	98.496	97.635	98.18	98.604	99.435	100.782	99.653	101.227	105.529	108.827	95.751	97.265	96.28	96.208	96.173	98.304	102.475	100.551	99.99	101.91	106.814
42	2520	5.902	12.518	13.414	13.686	13.433	13.635	13.439	13.049	13.216	16.561	16.055	18.361	109.386	98.661	100.131	99.202	99.447	100.069	97.235	96.631	98.492	98.52	97.039	100.908	108.431	95.414	98.224	98.594	97.765	98.314	98.6	99.555	100.604	99.759	101.637	106.065	108.741	95.924	97.19	96.514	96.422	96.339	98.612	102.594	100.31	99.892	101.916	107.249
42.3333	2540	5.878	12.622	13.535	13.692	13.473	13.753	13.473	13.175	13.133	16.559	16.075	18.353	109.535	98.657	100.155	99.28	99.559	99.949	97.465	96.804	98.782	98.645	96.869	101.014	108.357	95.433	98.206	98.52	97.951	98.424	98.694	99.624	100.916	99.839	101.296	105.612	108.624	95.843	97.306	96.557	96.618	96.306	98.59	102.8	100.62	99.927	102.041	107.316
42.6667	2560	6.027	12.671	13.602	13.698	13.524	13.698	13.516	13.031	13.275	16.663	16.361	18.416	109.743	98.859	100.249	99.235	99.404	100.041	97.48	96.861	99.106	98.859	97.239	100.739	108.325	95.543	98.057	98.569	98.127	98.443	98.622	99.625	100.773	99.978	101.498	106.365	108.933	96.014	97.329	96.447	96.661	96.431	98.747	102.8	100.475	100.118	102.263	107.312
43	2580	5.933	12.816	13.578	13.571	13.475	13.6	13.502	13.202	13.129	16.673	16.169	18.38	109.978	99.1	100.394	99.259	99.631	100.21	97.747	97.125	99.147	99.035	97.116	101.09	108.375	95.541	98.094	98.678	98.294	98.59	99.208	100.018	100.784	99.906	101.498	105.951	109.078	95.678	97.28	96.465	96.71	96.276	98.596	102.733	100.6	100.006	102.204	107.212
43.3333	2600	5.837	12.665	13.445	13.614	13.424	13.616	13.522	13.163	13.247	16.631	16.212	18.469	110.208	99.304	100.78	99.698	99.945	100.439	98.071	97.235	99.355	98.841	97.284	101.316	108.614	95.369	98.292	98.778	98.318	98.831	99.192	100.173	100.982	100.153	101.608	106.571	109.094	95.982	97.371	96.598	96.551	96.5	98.565	102.973	100.502	100.288	102.237	107.384
43.6667	2620	5.931	12.68	13.516	13.625	13.498	13.643	13.537	13.069	13.145	16.706	16.192	18.398	110.173	99.184	100.6	99.208	99.657	100.088	97.947	97.251	99.096	99.112	97.312	101.224	108.273	95.327	98.149	98.802	97.994	98.606	98.99	99.81	101.116	100.147	101.657	106.255	108.822	95.857	97.22	96.422	96.533	96.235	98.729	102.837	100.655	100.204	102.192	107.365
44	2640	5.869	12.602	13.551	13.567	13.457	13.704	13.612	13.175	13.298	16.786	16.247	18.516	110.331	99.376	100.716	99.476	99.955	100.349	97.825	97.229	99.053	98.992	97.312	101.373	108.394	95.425	98.231	98.845	98.104	98.598	99.192	100.11	101.145	100.255	101.688	106.245	109.28	95.871	97.337	96.514	96.696	96.359	98.788	102.843	100.749	100.224	102.184	107.259
44.3333	2660	5.984	12.786	13.622	13.667	13.602	13.675	13.649	13.265	13.227	16.729	16.327	18.661	110.814	99.151	100.927	99.598	100.239	100.794	98.196	97.202	99.486	99.008	97.68	101.796	108.614	95.531	98.224	98.902	98.4	98.8	99.359	100.171	101.431	100.516	101.753	106.869	109.045	96.024	97.347	96.649	96.827	96.682	98.865	102.849	100.835	100.433	102.42	107.496
44.6667	2680	5.906	12.729	13.614	13.645	13.494	13.773	13.627	13.269	13.284	16.953	16.292	18.584	110.631	99.669	101.02	99.559	99.935	100.382	98.002	97.324	99.316	99.288	97.622	101.663	108.278	95.58	98.075	98.802	98.231	98.98	99.353	100.337	101.202	100.353	101.475	106.467	109.053	95.965	97.384	96.62	96.584	96.514	98.757	102.747	100.688	100.261	102.498	107.147
45	2700	5.941	12.7	13.708	13.702	13.51	13.688	13.629	13.218	13.28	16.927	16.263	18.561	110.861	99.412	101.357	99.592	100.161	100.727	98.024	97.263	99.196	99.629	97.692	101.588	108.288	95.351	98.122	98.582	98.222	98.696	99.384	100.271	101.396	100.3	101.645	106.451	109.369	96.061	97.349	96.559	96.69	96.575	98.892	103.012	100.663	100.271	102.378	107.294
45.3333	2720	5.951	12.718	13.533	13.669	13.506	13.704	13.524	13.273	13.292	16.912	16.255	18.782	110.986	99.916	101.518	100.171	100.192	100.663	98.224	97.478	99.51	99.553	97.951	101.82	108.076	95.492	98.218	98.555	98.19	98.755	99.504	100.29	101.48	100.48	101.794	106.884	109.365	96.259	97.492	96.659	96.806	96.59	98.963	103.147	100.945	100.249	102.353	107.527
45.6667	2740	5.937	12.824	13.649	13.722	13.539	13.688	13.575	13.325	13.373	16.884	16.373	18.622	111.276	100.084	101.457	100.004	100.394	100.9	98.224	97.504	99.437	100.061	98.106	102.135	108.463	95.725	98.255	98.861	98.302	98.671	99.635	100.553	101.698	100.622	101.988	106.992	109.345	96.253	97.714	96.7	97.104	96.637	99.106	103.031	100.882	100.576	102.576	107.557
46	2760	5.939	12.716	13.645	13.584	13.565	13.682	13.635	13.235	13.314	16.902	16.369	18.955	111.163	100.141	101.453	99.929	100.241	100.839	98.259	97.286	99.559	99.986	98.143	102.127	108.216	95.2	98.373	98.504	98.382	98.902	99.759	100.578	101.843	100.475	101.776	106.539	109.167	95.939	97.655	96.712	96.775	96.475	98.945	103.1	100.961	100.3	102.42	107.537
46.3333	2780	5.898	12.771	13.639	13.633	13.467	13.735	13.541	13.286	13.375	16.894	16.482	18.771	111.224	100.322	101.616	100	100.404	101.035	98.357	97.396	99.355	100.061	98.114	102.133	108.376	95.453	98.078	98.41	97.951	98.557	99.669	100.422	101.79	100.586	101.808	107.063	109.49	96.284	97.606	96.545	96.637	96.72	99.065	103.061	100.914	100.482	102.478	107.516
46.6667	2800	5.963	12.773	13.725	13.767	13.576	13.82	13.698	13.357	13.449	17.094	16.473	18.724	111.516	100.443	101.996	100.384	100.567	100.943	98.508	97.498	99.571	100.251	98.769	102.527	108.314	95.608	98.271	98.89	98.12	98.78	99.959	100.867	102.11	100.863	102.235	107.329	109.612	96.408	97.757	96.724	96.824	96.827	99.273	103.312	101.125	100.514	102.759	107.845
47	2820	5.867	12.702	13.498	13.522	13.478	13.551	13.539	13.212	13.341	17.002	16.378	18.878	111.373	100.194	101.594	99.898	100.414	101.088	98.218	97.433	99.471	100.222	98.422	102.294	108.018	95.378	97.886	98.471	97.994	98.433	99.9	100.724	101.804	100.739	102.002	107.214	109.375	95.992	97.451	96.688	96.767	96.676	99.102	103.273	100.927	100.465	102.631	107.567
47.3333	2840	5.875	12.7	13.431	13.527	13.449	13.561	13.665	13.308	13.302	17.047	16.469	18.894	111.81	100.465	101.971	100.469	100.555	101.269	98.518	97.629	99.884	100.298	98.553	102.551	108.096	95.378	98.302	98.567	98.061	98.594	100.086	100.875	102.073	101.157	102.298	107.027	109.598	96.216	97.588	96.831	97.057	96.825	99.153	103.061	100.875	100.48	102.645	107.675
47.6667	2860	5.8	12.653	13.58	13.557	13.504	13.731	13.582	13.206	13.335	17.024	16.512	18.855	111.855	100.545	102.065	100.512	100.698	101.357	98.586	97.739	99.925	100.445	98.684	102.612	108.145	95.396	98.1	98.543	97.973	98.6	100.116	100.992	102.22	101.051	102.555	107.159	109.567	96.206	97.716	96.949	97.08	96.792	99.18	103.325	101.275	100.68	102.667	107.635
48	2880	5.984	12.845	13.671	13.671	13.569	13.806	13.741	13.349	13.533	17.1	16.612	18.965	111.894	100.839	102.245	100.512	100.571	101.473	98.51	97.806	99.945	100.508	98.992	102.912	108.225	95.633	98.298	98.759	98.231	98.886	100.475	101.112	102.539	101.355	102.614	107.635	109.565	96.247	97.576	97.151	97.263	97.031	99.314	103.32	101.241	100.606	102.633	107.98
48.3333	2900	5.918	12.725	13.631	13.631	13.547	13.792	13.69	13.433	13.42	17.024	16.614	18.947	112.371	101.049	102.525	100.786	101.073	101.62	98.975	98.245	100.357	100.575	99.137	102.745	108.235	95.584	98.078	98.675	98.069	98.584	100.275	101.053	102.565	101.245	102.612	107.816	109.81	96.588	97.831	97.01	97.225	97.184	99.486	103.508	101.273	100.8	102.804	107.667
48.6667	2920	5.969	12.78	13.59	13.586	13.435	13.675	13.7	13.265	13.457	17.029	16.545	18.904	112.3	100.78	102.459	100.586	100.99	101.98	98.929	98.19	100.539	100.724	99.265	103.118	108.294	95.533	98.004	98.773	98.296	98.635	100.567	101.296	102.582	101.392	102.918	107.884	109.367	96.52	97.773	96.969	97.3	97.012	99.384	103.349	101.369	100.878	102.661	107.814
49	2940	5.969	12.831	13.684	13.661	13.61	13.737	13.696	13.367	13.453	17.235	16.624	18.959	112.055	100.871	102.375	100.667	101.018	101.624	98.861	98.084	100.061	100.563	98.755	102.916	108.278	95.433	98.284	98.527	97.998	98.688	100.494	101.324	102.296	101.5	102.678	107.724	109.584	96.516	97.875	96.924	97.353	97.051	99.431	103.404	101.447	100.694	102.959	107.884
49.3333	2960	5.992	12.81	13.718	13.673	13.671	13.743	13.849	13.504	13.512	17.208	16.651	19.025	112.598	101.359	102.831	100.945	101.145	101.796	99.014	98.478	100.504	100.876	99.49	103.39	108.284	95.459	98.175	98.569	98.161	98.671	100.488	101.269	102.439	101.551	103.155	108.078	109.859	96.435	97.853	97.084	97.145	96.955	99.447	103.625	101.486	100.878	102.804	107.859
49.6667	2980	6.022	12.925	13.641	13.7	13.557	13.727	13.833	13.427	13.467	17.165	16.606	19.1	112.69	101.541	103.004	101.035	101.578	102.022	99.41	98.714	100.884	100.986	99.267	103.314	108.155	95.431	98.41	98.725	98.112	98.794	100.639	101.425	102.365	101.7	103.222	108.461	109.824	96.588	97.975	97.175	97.467	97.21	99.667	103.608	101.392	100.875	102.959	107.939
50	3000	5.92	12.753	13.741	13.696	13.527	13.718	13.739	13.463	13.459	17.063	16.565	18.941	112.778	101.543	102.853	101.231	101.345	101.949	99.169	98.467	100.543	100.853	99.347	103.125	108.276	95.533	98.353	98.812	98.194	98.486	100.398	101.143	102.486	101.747	103.365	108.267	109.667	96.469	98.016	97.257	97.422	96.973	99.51	103.718	101.259	100.949	102.914	107.867
50.3333	3020	5.955	12.796	13.563	13.59	13.429	13.573	13.8	13.429	13.482	17.047	16.561	19.024	112.692	101.28	102.851	100.906	101.373	101.971	99.339	98.563	100.62	100.978	99.547	103.355	108.063	95.392	98.173	98.475	98.227	98.655	100.549	101.235	102.32	101.949	103.363	108.151	109.688	96.412	98.033	97.098	97.227	97.225	99.29	103.59	101.378	100.894	102.89	107.986
50.6667	3040	5.927	12.827	13.667	13.663	13.441	13.627	13.847	13.445	13.52	17.202	16.555	18.925	112.706	101.486	102.643	100.798	101.443	102.092	99.308	98.824	100.48	101.135	99.373	103.341	108.075	95.253	97.992	98.62	98.145	98.731	100.669	101.382	102.327	102.125	103.639	108.339	109.69	96.473	97.914	96.88	97.131	97.031	99.508	103.731	101.673	100.931	102.933	108.067
51	3060	5.922	12.859	13.575	13.694	13.573	13.747	13.873	13.496	13.524	17.298	16.802	19.067	112.978	101.869	103.518	101.657	101.859	102.441	99.778	98.784	101.245	101.298	99.608	103.651	108.312	95.567	98.282	98.882	98.216	98.6	100.698	101.382	102.573	102.014	103.845	108.4	109.998	96.722	98.22	97.216	97.496	97.365	99.718	103.81	101.647	101.063	103.065	108.049
51.3333	3080	5.92	12.79	13.694	13.655	13.576	13.755	13.831	13.58	13.686	17.239	16.716	19.039	113.227	101.739	103.429	101.376	101.733	102.445	99.884	99.194	101.092	101.288	99.843	103.584	108.249	95.588	97.953	98.516	98.002	98.608	100.592	101.359	102.441	102.208	103.918	108.414	109.951	96.649	97.904	97.225	97.347	97.214	99.584	103.759	101.682	101.053	103.071	108.055
51.6667	3100	5.992	12.876	13.735	13.631	13.598	13.818	13.855	13.459	13.476	17.202	16.639	19.008	113.125	101.829	103.318	101.398	101.753	102.494	99.616	99.245	101.296	101.506	100.02	103.729	108.316	95.345	98.127	98.602	98.071	98.576	100.6	101.429	102.704	102.359	104.19	108.867	109.959	96.676	98.102	97.261	97.382	97.239	99.633	103.961	101.669	101.257	103.361	108.208
52	3120	5.969	12.816	13.596	13.637	13.502	13.776	13.839	13.473	13.545	17.243	16.543	19.088	113.276	101.986	103.28	101.449	101.835	102.398	99.722	99.014	101.163	101.484	99.869	103.68	108.22	95.375	98.108	98.631	97.896	98.369	100.586	101.282	102.408	102.367	104.063	108.673	110.202	96.91	98.137	97.329	97.516	97.28	99.714	103.853	101.702	101.112	103.147	108.386
52.3333	3140	5.976	12.814	13.69	13.763	13.665	13.863	14.002	13.463	13.578	17.278	16.708	19.218	113.088	101.669	103.351	101.447	101.733	102.38	99.902	99.125	101.294	101.084	99.831	103.802	108.335	95.257	98.282	98.276	98.159	98.688	100.714	101.402	102.667	102.429	103.851	108.743	110.169	96.971	98.175	97.529	97.475	97.488	99.849	104.255	101.845	101.22	103.337	108.096
52.6667	3160	6.012	12.873	13.637	13.663	13.569	13.722	13.945	13.571	13.745	17.282	16.808	19.225	113.586	102.045	103.573	101.737	102.127	102.571	100.033	99.19	101.51	101.659	99.982	103.918	108.265	95.498	98.28	98.712	98.218	98.922	100.727	101.48	102.51	102.512	104.09	108.631	110.441	97.008	98.288	97.543	97.584	97.473	99.947	104.1	101.888	101.257	103.3	108.312
53	3180	5.963	12.961	13.625	13.68	13.675	13.7	13.98	13.62	13.571	17.349	16.747	19.053	113.233	102.282	103.625	101.384	102.331	102.447	100.075	99.478	101.531	101.82	100.076	103.908	108.408	95.384	98.096	98.661	98.3	98.586	100.812	101.553	102.661	102.533	104.075	108.835	110.102	96.871	98.308	97.52	97.786	97.324	99.894	103.967	101.904	101.173	103.324	108.282
53.3333	3200	5.929	12.904	13.576	13.678	13.496	13.851	13.978	13.561	13.578	17.261	16.771	19.218	113.794	102.586	103.725	101.876	102.492	103.02	100.296	99.625	101.731	101.753	100.276	104.553	108.449	95.453	98.416	98.861	98.224	98.755	100.727	101.51	102.775	102.753	104.267	109.357	110.261	97.018	98.345	97.722	97.694	97.725	100.016	104.225	101.924	101.596	103.402	108.437
53.6708	3220.25	5.898	12.896	13.567	13.645	13.545	13.863	13.986	13.584	13.647	17.327	16.8	19.29	113.578	102.41	103.814	101.863	102.324	102.99	100.39	99.753	101.547	101.914	100.28	104.327	108.296	95.512	98.433	98.604	97.922	98.555	100.629	101.278	102.61	102.665	104.184	108.694	110.333	96.88	98.335	97.594	97.706	97.61	99.976	104.32	101.896	101.343	103.373	108.496
54	3240	5.984	12.898	13.624	13.645	13.569	13.845	14.137	13.688	13.686	17.29	16.816	19.225	113.837	102.298	103.902	102.063	102.686	103.016	100.4	99.492	101.571	101.733	100.457	104.253	108.316	95.522	98.186	98.657	98.327	98.982	100.659	101.382	102.5	102.594	104.31	108.841	110.38	96.892	98.431	97.476	97.747	97.476	99.896	104.32	101.884	101.422	103.416	108.537
54.3333	3260	5.976	12.947	13.669	13.653	13.571	13.863	14.008	13.641	13.722	17.31	16.755	19.259	113.563	102.267	103.618	101.631	102.322	102.886	100.298	99.535	101.516	101.741	99.729	104.114	108.133	95.359	98.261	98.38	98.041	98.684	100.667	101.316	102.473	102.422	104.031	108.804	110.063	96.757	98.186	97.388	97.647	97.492	99.961	104.222	101.741	101.306	103.241	108.571
54.6667	3280	5.945	12.829	13.639	13.737	13.547	13.782	13.971	13.625	13.635	17.414	16.824	19.165	114.125	102.682	104.153	102.175	102.469	103.282	100.555	99.841	101.818	102.006	100.525	104.524	108.496	95.453	98.259	98.71	97.88	98.678	100.79	101.427	102.725	102.739	104.408	108.9	110.504	97.006	98.416	97.645	97.845	97.52	99.996	104.222	102.273	101.492	103.453	108.322
55	3300	5.945	12.853	13.618	13.535	13.424	13.761	14.016	13.567	13.678	17.314	16.682	19.118	113.671	102.486	103.773	102.022	102.337	103.108	100.475	99.525	101.925	101.822	100.392	104.243	108.073	95.243	98.008	98.569	98.029	98.557	100.571	101.349	102.288	102.48	104.235	108.847	110.208	96.633	98.076	97.52	97.814	97.545	100.031	104.002	101.949	101.359	103.451	108.396
55.3333	3320	5.925	12.908	13.531	13.749	13.59	13.782	13.976	13.598	13.655	17.32	16.829	19.086	113.867	102.616	103.965	102.076	102.743	103.402	100.443	99.851	101.812	102.033	100.42	104.433	108.18	95.557	98.259	98.547	97.8	98.459	100.465	101.184	102.453	102.559	104.29	108.861	110.359	97.106	98.398	97.471	97.841	97.492	100.11	104.175	102.039	101.404	103.41	108.682
55.6667	3340	5.882	12.941	13.539	13.692	13.504	13.722	14.049	13.655	13.731	17.378	16.833	19.163	114.116	102.618	104.141	102.186	102.539	103.363	100.518	99.661	102.039	102.212	100.445	104.68	108.308	95.437	98.124	98.702	97.91	98.38	100.58	101.296	102.494	102.722	104.2	109.035	110.255	96.906	98.414	97.486	97.851	97.582	100.161	104.247	102.122	101.482	103.469	108.847
56.0042	3360.25	5.869	12.904	13.422	13.659	13.445	13.816	14.033	13.578	13.7	17.31	16.873	19.18	114.335	102.906	104.367	102.62	102.82	103.633	100.761	100.155	102.361	102.265	100.759	104.894	108.357	95.565	98.239	98.633	97.98	98.645	100.753	101.322	102.465	102.665	104.492	108.914	110.261	96.994	98.559	97.733	98.153	97.724	100.155	104.459	102.061	101.763	103.4	108.673
56.3333	3380	5.951	12.91	13.714	13.751	13.561	13.757	14.075	13.653	13.782	17.443	16.786	19.151	114.037	102.72	104.076	102.239	102.835	103.631	100.694	100.053	102.088	102.506	100.775	104.725	108.029	95.431	98.163	98.524	97.906	98.298	100.384	101.006	102.504	102.655	104.247	108.99	110.298	96.798	98.355	97.676	97.851	97.551	100.143	104.261	102.08	101.525	103.598	108.604
56.6708	3400.25	5.978	12.929	13.582	13.68	13.52	13.737	14.108	13.702	13.751	17.337	16.896	19.253	114.186	102.818	104.324	102.486	103.124	103.671	100.898	100.214	101.935	102.306	100.755	105.084	108.278	95.447	98.204	98.537	98.002	98.539	100.663	101.461	102.696	102.757	104.369	109.1	110.412	96.998	98.451	97.827	97.837	97.7	100.269	104.435	102.02	101.645	103.776	108.743
57.0042	3420.25	6.037	13.045	13.645	13.814	13.537	13.771	14.131	13.849	13.788	17.514	16.937	19.243	114.422	102.81	104.567	102.7	103.218	103.708	100.806	100.292	102.21	102.771	101.073	104.959	108.275	95.441	98.445	98.667	98.151	98.602	100.743	101.398	102.508	102.645	104.427	109.016	110.496	97.214	98.535	97.818	98.186	97.794	100.359	104.547	102.314	101.733	103.718	108.953
57.3333	3440	5.929	12.878	13.52	13.661	13.461	13.78	14.082	13.684	13.661	17.398	16.961	19.324	114.341	103.151	104.231	102.737	103.088	103.527	100.676	100.098	101.939	102.514	101.059	104.72	108.214	95.331	98.357	98.535	98.043	98.671	100.596	101.194	102.459	102.767	104.194	108.812	110.271	96.978	98.412	97.871	97.959	97.659	100.269	104.422	102.094	101.594	103.702	108.673
57.6667	3460	5.91	12.959	13.72	13.698	13.469	13.741	14.145	13.886	13.902	17.398	16.931	19.278	114.525	102.892	104.559	102.724	103.253	103.857	101.045	100.29	102.333	102.782	101.12	105.063	108.482	95.196	98.31	98.463	97.969	98.494	100.539	101.469	102.771	102.722	104.29	108.927	110.249	96.943	98.373	97.865	98.098	97.79	100.227	104.457	102.38	101.759	103.72	108.843
58.0042	3480.25	5.99	13.024	13.643	13.747	13.525	13.896	14.188	13.806	13.878	17.498	16.953	19.316	114.594	103.237	104.535	102.871	103.42	104.204	101.429	100.769	102.871	103.057	101.133	105.355	108.445	95.545	98.316	98.878	98.271	98.68	100.702	101.671	102.757	102.89	104.659	109.022	110.461	97.018	98.406	97.788	98.231	98.086	100.4	104.5	102.447	101.782	103.59	108.837
58.3333	3500	5.835	12.976	13.727	13.659	13.475	13.739	14.145	13.859	13.841	17.48	16.81	19.294	114.545	103.21	104.492	102.784	103.176	103.91	101.08	100.286	102.41	102.718	101.067	105.159	108.359	95.553	98.198	98.665	97.798	98.431	100.486	101.224	102.447	102.643	104.371	108.894	110.437	96.894	98.404	97.863	97.994	97.845	100.196	104.443	102.337	101.753	103.743	108.68
58.6708	3520.25	5.973	12.924	13.741	13.729	13.467	13.71	14.039	13.737	13.798	17.412	16.978	19.186	114.49	103.12	104.586	102.865	103.386	103.935	101.365	100.445	102.651	102.778	101.484	105.376	108.202	95.649	98.151	98.594	97.775	98.414	100.492	101.318	102.6	102.933	104.5	108.914	110.539	97.129	98.72	98.061	98.167	97.839	100.333	104.588	102.233	101.606	103.986	108.88
59	3540	5.957	12.884	13.592	13.684	13.241	13.565	14.175	13.806	13.857	17.269	16.882	19.325	114.839	103.204	104.535	102.929	103.286	104.002	101.214	100.431	102.441	103.018	101.006	105.157	108.292	95.363	98.171	98.745	97.937	98.547	100.61	101.304	102.316	102.775	104.31	108.857	110.337	97.045	98.382	97.702	97.955	97.778	100.327	104.28	102.467	101.676	103.649	108.888
59.3333	3560	5.916	12.953	13.525	13.712	13.39	13.737	14.157	13.716	13.794	17.406	16.912	19.292	114.673	103.027	104.731	102.949	103.58	103.996	101.278	100.48	102.661	102.951	101.418	105.253	108.357	95.663	98.48	98.741	97.906	98.506	100.52	101.288	102.271	102.757	104.337	108.996	110.6	96.839	98.351	97.896	98.106	97.867	100.508	104.524	102.371	101.786	103.8	108.945
59.6667	3580	5.925	12.924	13.518	13.694	13.386	13.68	14.171	13.741	13.9	17.39	16.861	19.173	114.886	103.412	104.882	103.051	103.512	104.041	101.363	100.633	102.676	103.012	101.367	105.445	108.345	95.663	98.396	98.663	97.88	98.355	100.52	101.233	102.576	102.559	104.375	109.014	110.345	97.053	98.643	97.955	98.196	98.075	100.427	104.688	102.612	101.796	103.914	108.994
60.0042	3600.25	6.112	13.063	13.786	13.814	13.571	13.771	14.259	13.867	13.914	17.492	17.086	19.253	115.171	103.645	105.094	103.655	103.847	104.578	101.798	101.016	102.98	103.355	101.839	105.696	108.541	95.631	98.547	98.894	98.325	98.565	100.537	101.5	102.539	102.992	104.688	109.229	110.704	97.255	98.702	98.131	98.353	98.114	100.494	104.727	102.737	101.845	104.075	109.033
60.3375	3620.25	6.088	12.898	13.875	13.845	13.455	13.72	14.2	13.8	13.882	17.506	16.812	19.335	115.145	103.565	104.843	103.435	103.835	104.516	101.588	100.825	102.724	103.28	101.527	105.643	108.512	95.649	98.449	98.704	98.027	98.563	100.48	101.573	102.404	102.806	104.243	108.886	110.502	97.361	98.457	98.147	98.449	98.049	100.404	104.827	102.637	102.139	103.976	109.202
60.6708	3640.25	5.92	12.951	13.708	13.79	13.471	13.724	14.255	13.925	13.896	17.533	17.09	19.439	114.98	103.659	105.133	103.565	103.833	104.592	101.753	101.039	103.051	103.547	101.814	105.81	108.71	95.978	98.678	98.941	98.208	98.673	100.767	101.429	102.708	102.947	104.551	109.247	110.551	97.337	98.884	98.351	98.386	98.325	100.61	104.961	102.445	101.935	104.116	109.178
61.0042	3660.25	5.873	12.904	13.747	13.641	13.41	13.61	14.235	13.808	13.851	17.488	16.949	19.282	114.922	103.484	104.847	103.255	103.739	104.502	101.486	100.747	103.261	103.147	101.62	105.692	108.72	95.798	98.343	98.718	98.061	98.569	100.639	101.349	102.592	102.9	104.533	109.204	110.533	97.259	98.639	98.124	98.325	98.22	100.706	104.735	102.498	101.906	103.925	109.071
61.3375	3680.25	5.941	12.978	13.661	13.733	13.276	13.727	14.247	13.722	13.976	17.5	17.031	19.339	114.869	103.396	104.747	103.235	103.776	104.614	101.767	100.784	103.014	103.369	101.81	105.594	108.522	95.512	98.273	98.729	98.186	98.624	100.643	101.365	102.494	102.582	104.165	108.9	110.476	97.041	98.402	98.029	98.361	98.067	100.473	104.578	102.429	101.914	103.9	108.843
61.6667	3700	5.912	13.01	13.78	13.669	13.433	13.735	14.347	13.996	13.992	17.549	16.961	19.361	115.431	103.625	105.169	103.437	103.939	104.69	101.667	101.069	103.2	103.392	101.761	105.806	108.563	95.573	98.445	99.055	98.051	98.624	100.725	101.369	102.441	102.88	104.467	109.155	110.559	97.249	98.608	98.273	98.32	98.073	100.616	104.825	102.588	101.765	103.976	109.055
62	3720	5.918	12.947	13.573	13.671	13.467	13.625	14.325	13.935	13.888	17.443	16.973	19.263	115.331	103.627	105.194	103.467	104.145	104.524	101.747	101.029	103.161	103.32	101.806	105.835	108.455	95.618	98.58	98.808	97.871	98.725	100.735	101.171	102.453	102.745	104.327	108.961	110.553	97.253	98.655	98.186	98.333	98.086	100.531	105.114	102.765	102.198	104.037	109.143
62.3333	3740	5.998	13.025	13.714	13.757	13.425	13.641	14.4	13.884	13.969	17.471	17.096	19.388	115.167	103.747	105.106	103.584	104.006	104.588	101.898	101.141	103.361	103.535	101.849	106.039	108.557	95.876	98.725	98.861	98.271	98.724	100.649	101.439	102.584	102.951	104.58	109.273	110.549	97.294	98.865	98.333	98.594	98.404	100.89	104.667	102.804	102.182	104.171	109.139
62.6708	3760.25	5.927	12.902	13.822	13.69	13.398	13.665	14.41	13.88	14.029	17.557	17.063	19.288	115.349	103.804	105.251	103.278	103.908	104.455	101.831	101.061	103.235	103.575	101.776	105.612	108.386	95.665	98.592	98.655	97.941	98.596	100.443	101.239	102.571	102.735	104.231	108.669	110.724	97.3	98.725	98.127	98.337	98.067	100.669	104.737	102.682	101.931	104.047	109.161
63.0042	3780.25	5.965	12.992	13.796	13.696	13.388	13.737	14.335	13.869	13.957	17.445	16.908	19.312	115.429	103.737	105.269	103.522	103.869	104.575	101.886	100.986	103.157	103.81	102.09	105.939	108.431	95.835	98.525	98.816	97.951	98.692	100.71	101.22	102.422	102.818	104.39	108.976	110.598	97.275	98.633	98.333	98.322	98.249	100.535	104.894	102.733	102.145	103.904	109.047
63.3375	3800.25	5.996	12.943	13.624	13.733	13.533	13.82	14.473	13.88	13.924	17.529	17.018	19.324	115.192	103.875	105.275	103.555	104.178	104.547	102.022	101.188	103.21	103.708	102.118	106.012	108.533	95.949	98.594	98.616	98.263	98.863	100.661	101.473	102.529	102.831	104.663	108.812	110.592	97.214	98.606	98.275	98.498	98.196	100.606	104.984	102.675	102.276	104.041	109.343
63.6708	3820.25	5.869	12.953	13.669	13.539	13.422	13.698	14.255	13.935	13.935	17.531	16.982	19.32	115.3	103.796	105.259	103.476	104.024	104.725	101.869	101.292	103.443	103.586	101.976	105.998	108.71	95.586	98.563	98.884	98.357	98.761	100.541	101.192	102.492	102.641	104.218	108.875	110.514	97.106	98.549	98.265	98.392	98.147	100.563	104.765	102.694	102.125	104.082	109.124
64.0042	3840.25	5.91	12.986	13.694	13.678	13.433	13.686	14.392	13.941	14.071	17.478	16.925	19.345	115.302	103.835	105.469	103.5	103.963	104.659	101.92	101.118	103.355	103.947	101.931	106.167	108.541	95.725	98.586	98.806	98.071	98.767	100.398	101.01	102.424	102.712	104.355	108.81	110.612	97.186	98.539	98.255	98.49	98.198	100.696	105.018	102.667	101.955	104.308	109.261
64.3375	3860.25	6.053	13.024	13.727	13.631	13.42	13.722	14.422	14.051	14.11	17.584	16.982	19.502	115.52	103.882	105.276	103.527	104.082	104.771	102.145	101.286	103.431	103.922	102.045	106.359	108.704	95.625	98.624	98.873	98.167	98.702	100.682	101.302	102.384	102.629	104.341	108.859	110.384	97.161	98.575	98.349	98.384	98.045	100.745	104.888	102.825	102.171	104.329	109.373
[truncated: 48 more columns]

## Sheet: MTP3_raw
Time (h)	Time (min)	A1	A2	A3	A4	A5	A6	A7	A8	A9	A10	A11	A12	B1	B2	B3	B4	B5	B6	B7	B8	B9	B10	B11	B12	C1	C2	C3	C4	C5	C6	C7	C8	C9	C10	C11	C12	D1	D2	D3	D4	D5	D6	D7	D8	D9	D10	D11	D12
0	0	6.155	6.231	7.304	8.647	9.516	9.184	8.441	7.535	6.965	6.525	5.547	6.516	6.214	6.4	7.537	8.59	8.557	8.673	8.345	7.224	8.018	7.414	6.233	6.178	5.533	5.253	7.202	7.225	7.171	7.204	7.141	7.476	7.143	6.635	5.867	5.657	5.557	6.002	6.7	6.982	6.565	7.243	6.549	7.457	5.973	5.884	6.2	5.347
0.333333	20	6.361	6.667	7.871	9.145	9.692	8.949	8.167	7.253	6.849	6.524	5.633	6.594	6.373	6.843	8.108	9.149	8.698	8.702	8.118	7.265	8.247	8.11	6.351	6.42	5.763	5.482	7.551	7.465	7.243	6.859	6.782	7.322	7.31	6.906	6.006	5.624	5.714	6.384	7.078	7.292	6.776	7.2	6.588	7.549	6.124	5.953	6.206	5.451
0.666667	40	6.327	6.569	7.822	9.557	9.28	8.647	7.755	6.794	6.557	6.186	5.373	6.42	6.306	6.702	8.014	9.075	8.475	8.171	7.618	6.845	8.025	7.363	6.229	6.231	5.714	5.498	7.622	7.339	6.924	6.635	6.406	6.9	7.106	6.71	5.843	5.427	5.794	6.408	7.169	7.208	6.763	6.935	6.382	7.296	6.035	5.929	6.186	5.402
1	60	6.533	6.894	8.251	10.224	9.833	9.102	8.261	7.38	6.992	6.669	5.912	6.845	6.525	7.133	8.488	9.441	8.651	8.198	7.806	7.073	8.357	8.157	6.735	6.716	5.865	5.637	8.063	7.802	6.984	6.747	6.635	7.082	7.308	6.961	6.235	5.845	6.104	6.6	7.369	7.629	7.065	7.28	6.637	7.629	6.431	6.233	6.502	5.741
1.33333	80	6.394	6.553	7.847	10.527	9.369	9.063	8.367	7.508	6.975	6.606	5.733	6.696	6.482	6.8	8.165	8.992	8.312	8.071	7.69	7.041	8.28	7.78	6.427	6.441	5.814	5.5	7.671	7.196	6.886	6.753	6.561	7.041	7.241	6.731	6.118	5.775	6.09	6.478	7.253	7.431	6.839	7.198	6.647	7.775	6.486	6.337	6.445	5.637
1.66667	100	6.453	6.68	8.027	10.68	9.392	8.953	7.953	7.145	6.88	6.484	5.533	6.6	6.571	7.053	8.471	9.12	8.269	7.943	7.559	6.904	8.206	8.092	6.418	6.457	5.9	5.598	7.816	7.341	6.963	6.804	6.478	6.998	7.202	6.706	6.059	5.616	6.308	6.794	7.478	7.614	6.941	7.414	6.698	7.91	6.582	6.394	6.578	5.831
2	120	6.853	7.006	8.427	10.541	10.057	9.678	8.888	8.21	7.453	7.255	6.392	7.414	7.229	7.537	8.945	9.412	8.622	8.178	7.751	7.363	8.759	8.82	6.729	6.788	6.29	5.855	7.957	7.604	7.082	6.896	6.729	7.308	7.5	7.037	6.361	6.314	6.608	7.067	7.939	8.006	7.375	7.684	7.235	8.388	7.053	6.827	7.141	6.357
2.33333	140	6.741	6.986	8.339	10.716	9.767	9.216	8.488	7.588	7.176	6.957	5.998	7.076	7.251	7.775	9.043	9.333	8.622	8.218	7.959	7.292	8.79	10.424	6.875	6.939	6.347	5.986	8.114	7.68	7.1	6.865	6.853	7.269	7.749	7.092	6.429	6.282	6.749	7.388	8.175	8.212	7.584	7.878	7.345	8.469	7.22	6.937	7.153	6.427
2.66667	160	6.741	6.737	7.984	10.861	9.69	9.392	8.741	8.008	7.533	7.225	6.21	7.325	7.335	7.608	8.729	9.441	8.61	8.445	8.202	7.529	8.902	11.41	7.196	7.194	6.51	5.894	8.127	7.812	7.237	6.98	7.008	7.49	7.753	7.308	6.667	6.263	7.143	7.398	8.076	8.237	7.753	8.114	7.641	8.906	7.518	7.21	7.571	6.665
3	180	7.12	7.357	8.812	10.955	10.386	9.912	8.876	8.247	7.751	7.549	6.59	7.551	7.739	8.182	9.408	9.961	8.843	8.565	8.429	7.806	9.163	12.51	7.478	7.398	6.906	6.508	8.42	8.057	7.31	7.241	7.198	7.586	7.935	7.475	6.771	6.394	7.52	8.078	8.739	8.753	8.204	8.502	8.059	9.198	7.82	7.514	7.92	7.273
3.33333	200	7.247	7.367	8.806	11.073	10.582	10.425	9.333	8.804	8.139	8.11	7.129	8.096	8.131	8.463	9.816	10.145	9.037	9.018	8.937	8.555	9.763	13.367	7.71	7.784	7.118	6.753	8.576	8.08	7.51	7.612	7.551	7.863	8.09	7.669	7.118	6.678	7.937	8.555	9.076	9.112	8.62	8.878	8.482	9.647	8.378	7.916	8.384	7.89
3.66667	220	7.118	7.212	8.561	11.143	10.073	9.722	8.588	7.976	7.796	7.449	6.541	7.549	8.259	8.769	9.914	10.135	9.486	9.631	9.692	9.42	10.637	13.975	7.869	7.992	7.176	6.725	8.582	8.18	7.731	7.841	8.071	8.29	8.353	7.673	7.19	6.847	8.333	8.741	9.435	9.459	8.978	9.19	9.076	10	8.641	8	8.376	7.941
4	240	7.253	7.435	8.778	11.204	10.275	9.729	8.42	7.735	7.725	7.363	6.514	7.316	8.645	9.106	10.027	10.355	10.047	10.502	10.314	10.178	11.547	14.629	8.498	8.325	7.498	6.931	8.688	8.473	8.122	8.325	8.59	8.947	8.784	7.867	7.129	6.902	8.731	9.218	9.91	9.971	9.496	10.224	10.031	10.986	9.171	8.398	8.606	8.484
4.33333	260	7.202	7.214	8.543	11.314	10.306	9.724	8.633	8.102	8	7.52	6.747	7.439	8.945	9.378	10.343	10.982	10.853	11.084	10.955	11.018	12.402	15.188	9.567	9.308	7.641	6.88	8.833	8.867	8.7	8.888	9.061	9.563	9.522	8.329	7.506	7.182	9.276	9.586	10.435	10.559	10.327	10.965	11.202	12.294	10.39	8.922	9.029	8.902
4.66667	280	7.678	7.822	9.182	11.576	10.788	10.141	8.957	8.49	8.422	7.943	7.051	7.833	9.686	10.447	11.359	11.906	11.847	11.618	11.425	11.782	13.198	16.424	10.959	10.61	8.133	7.245	9.231	9.516	9.525	9.335	9.557	10.147	10.357	9.069	8.12	7.398	10.241	10.429	11.827	11.908	11.159	11.865	12.216	13.592	12.153	9.651	9.802	9.614
5	300	7.82	7.886	9.304	11.565	11.298	10.522	9.398	8.937	8.924	8.355	7.514	8.202	10.963	11.68	12.578	12.967	12.294	12.086	11.976	12.131	13.931	17.178	12.273	12.21	8.459	7.549	9.661	10.224	10.002	9.861	10.094	10.596	10.788	10.002	8.818	8.096	11.212	11.225	13.143	12.992	11.955	12.808	13.096	14.702	13.388	11.486	10.753	10.649
5.33333	320	7.637	7.557	8.937	11.757	10.839	9.99	9.208	8.576	8.471	7.949	7.059	8.018	12.763	13.049	13.822	13.898	12.763	12.639	12.42	12.625	14.406	18.01	13.484	13.588	9.045	7.631	10.376	11.041	10.475	10.312	10.525	11.218	11.665	10.996	10.035	8.914	12.476	12.618	14.765	13.965	12.831	13.447	14.029	15.573	14.749	13.455	12.3	11.6
5.66667	340	7.973	8.094	9.575	11.939	10.912	9.931	9.01	8.476	8.176	7.853	6.924	7.965	14.857	14.367	14.967	14.702	13.461	13.38	13.096	13.225	15.027	19.331	14.18	14.48	10.312	8.29	10.933	11.655	10.924	10.733	10.873	11.624	12.333	11.771	11.18	9.935	14.798	15.002	15.973	14.955	13.849	14.441	14.91	16.641	15.771	14.967	15.192	13.776
6	360	7.831	7.839	9.251	12.076	10.694	9.941	9.216	8.569	8.218	7.953	6.92	8.09	15.894	14.947	15.484	15.114	14.01	14.198	13.804	14.024	15.586	21.063	14.598	15.208	11.72	8.406	11.429	11.916	11.096	11.008	11.302	11.902	12.627	12.345	12.09	11.453	18.498	16.761	16.937	15.994	14.922	15.404	15.837	17.682	16.963	16.202	17.08	18.329
6.33333	380	8.002	7.973	9.329	12.088	11.335	10.416	9.943	9.324	8.988	8.657	7.747	8.716	16.79	15.869	16.276	15.984	14.865	15.137	14.851	14.945	16.673	22.198	15.549	16.447	13.429	9.102	12.073	12.504	11.712	11.671	11.853	12.557	13.233	13.01	12.847	12.563	20.488	18.135	18.063	17.112	16.143	16.637	17	18.8	18.039	17.48	18.582	19.612
6.66667	400	8.418	8.569	10.01	12.349	11.406	10.455	9.778	9.286	9.016	8.786	7.624	8.949	17.743	16.733	17.151	16.945	15.888	16.145	15.645	15.888	17.476	23.035	16.543	17.331	14.582	10.014	12.496	13.18	12.327	12.233	12.429	13.086	13.735	13.455	13.327	13.512	22.082	19.2	19.302	18.416	17.561	17.694	18.388	20.163	19.255	18.639	19.68	20.98
7	420	8.239	8.151	9.563	12.363	11.457	10.504	10.2	9.576	9.333	9.31	7.902	9.306	18.692	17.484	17.867	17.782	16.945	17.282	17.002	17.051	18.931	25.088	17.504	18.533	15.396	11.406	12.776	13.58	12.906	12.847	13.298	13.782	14.331	14.155	13.898	14.151	23.341	20.484	20.714	19.89	18.994	19.224	19.892	21.571	20.714	19.925	21.01	22.424
7.33333	440	8.476	8.494	9.963	12.494	11.196	10.508	10.09	9.522	9.184	9.108	7.788	9.255	19.498	18.073	18.724	18.925	18.273	18.524	17.965	17.841	19.616	26.133	18.122	19.288	15.922	12.359	13.169	14.263	13.576	13.543	13.792	14.339	14.861	14.612	14.345	14.737	25.043	22.041	22.141	21.367	20.645	20.776	21.343	23.108	22.284	21.412	22.49	24.002
7.66667	460	8.302	8.327	9.714	12.725	11.227	10.543	10.763	10.194	9.571	9.984	7.994	9.706	21.263	19.533	20.067	20.241	19.265	20.049	19.235	19.057	20.857	27.735	20.004	20.912	16.886	12.961	13.645	15.092	14.531	14.353	14.806	15.376	15.912	15.565	15.198	15.61	26.614	23.792	23.996	23.039	22.386	22.469	23.069	24.898	24.012	22.692	24.275	25.924
8	480	8.333	8.4	9.8	12.867	11.037	10.635	11.557	10.998	10.345	11.506	8.167	10.671	22.457	20.682	21.19	21.335	20.635	21.463	20.735	20.476	22.333	29.235	21.22	22.359	17.814	13.408	14.259	16.053	15.345	15.337	15.618	16.225	16.741	16.482	16.135	16.435	29.024	25.586	25.718	25.108	24.382	24.388	24.969	26.59	25.91	24.727	26.161	27.953
8.33333	500	8.749	8.614	10.063	13.073	11.343	11.071	12.508	11.971	11.547	13.11	8.769	11.947	23.945	21.98	22.502	22.749	21.994	22.745	21.988	21.747	23.471	30.473	22.437	23.869	18.91	14.018	14.982	16.931	16.414	16.375	16.767	17.376	17.669	17.384	17.041	17.537	31.467	27.655	27.931	27.263	26.52	26.545	27.263	29.006	28.029	26.735	28.251	30.204
8.66667	520	8.869	9.082	10.58	13.39	11.316	10.998	13.127	12.902	12.712	14.545	9.216	13.42	25.425	23.229	23.833	23.851	23.241	24.161	23.259	22.869	24.527	29.337	23.561	25.063	19.733	14.578	16.078	17.663	16.865	16.927	17.469	17.918	18.598	18.28	17.747	18.212	34.169	29.935	30.237	29.373	28.745	28.845	29.529	31.198	30.249	28.563	30.41	32.561
9	540	8.98	9.253	10.853	13.678	11.724	11.392	13.684	13.588	13.641	15.614	10.643	14.747	26.757	24.361	24.878	25.125	24.406	25.388	24.396	23.794	25.694	30.104	24.716	26.298	21.057	15.437	16.661	18.614	17.959	17.955	18.325	18.967	19.4	19.192	18.822	19.169	36.455	32.039	32.467	31.78	31.253	31.029	31.706	33.363	32.322	30.925	32.851	34.869
9.33333	560	8.888	8.831	10.429	13.647	11.798	12.125	13.996	14.231	14.686	16.49	11.925	15.92	28.424	25.89	26.614	26.804	26.273	26.894	26.016	25.827	27.594	31.904	26.408	28.394	22.48	16.29	17.433	19.804	19.302	19.524	19.757	20.09	20.661	20.629	20.243	20.578	39.431	34.637	35.104	34.455	33.782	33.604	34.378	36.196	34.969	33.504	35.378	37.122
9.66667	580	9.196	9.296	10.961	13.796	11.927	12.437	14.453	14.614	15.249	16.925	12.573	16.629	29.896	26.986	27.814	28.171	26.624	27.22	26.729	26.412	28.861	33.924	27.339	29.131	23.622	17.143	18.173	20.9	20.471	20.604	21.022	21.422	21.631	21.449	21.249	22.12	42.451	37.463	37.855	37.353	36.584	36.465	37.269	38.847	37.725	36.282	38.325	39.79
10	600	9.347	9.233	10.875	14.245	12.473	13.537	15.145	15.263	16.286	17.89	12.541	18.002	30.816	28.104	28.969	28.618	27.8	28.21	27.696	27.59	29.237	35.971	28.596	30.286	24.745	18.178	19.104	21.931	21.424	21.51	21.804	22.292	22.72	22.627	22.312	22.925	46.014	40.545	41.257	40.524	39.869	39.622	40.357	42.163	40.902	39.367	41.169	42.792
10.3333	620	9.596	9.578	11.024	14.541	13.239	14.273	15.725	15.927	16.62	18.655	13.231	19.035	32.08	28.757	29.49	30.006	28.767	26.239	25.625	28.041	30.194	38.235	29.653	31.053	25.58	19.192	19.973	23.055	22.727	22.712	22.853	23.243	23.645	23.504	23.178	24.071	49.706	43.61	44.375	43.596	42.747	42.767	43.478	45.173	43.902	42.792	44.435	46.122
10.6667	640	9.802	9.818	11.155	14.941	14.039	14.559	16.196	16.222	16.845	19.094	13.814	19.484	31.918	29.4	30.29	29.994	27.206	27.592	26.788	26.722	29.996	39.604	29.306	29.567	27.078	20.282	20.645	24.38	24.104	24.012	24.165	24.669	25.01	24.753	24.561	25.557	53.38	47.086	47.973	46.898	46.163	45.967	46.929	48.81	47.265	46.275	47.661	49.424
11	660	10.312	10.129	11.39	15.249	15.065	14.849	17.073	17.106	17.743	20.261	14.433	20.645	31.314	30.28	31.257	31.331	29.045	29.396	28.88	28.704	31.773	42.457	30.38	31.686	28.48	21.035	21.784	25.137	25.035	24.571	25.227	25.484	25.908	25.551	25.765	26.427	57.655	50.692	51.588	50.743	50.098	49.827	50.624	52.596	50.982	49.749	51.522	53.327
11.3333	680	10.863	10.482	11.796	15.708	15.861	14.918	17.706	17.704	18.225	20.861	15.12	21.4	33.284	31.975	32.978	33.108	31.159	31.624	30.745	30.602	33.775	44.584	31.798	33.373	29.645	22.237	22.792	26.149	25.62	25.606	25.865	26.239	26.567	26.688	26.816	28.012	62.359	54.755	55.629	54.812	53.969	53.604	54.575	56.52	55.045	53.953	55.363	57.265
11.6667	700	11.82	11.21	12.253	16.031	16.271	15.388	18.506	18.549	19.043	21.984	15.88	22.378	35.543	33.602	34.839	34.822	32.91	33.367	32.651	32.484	35.635	46.851	33.725	35.384	30.971	23.225	23.684	27.369	26.649	26.449	26.886	27.386	27.635	27.718	27.769	29.008	67.684	59.343	60.455	59.641	58.733	58.349	59.243	61.143	59.586	58.398	59.927	62.112
12	720	13.416	11.855	12.627	16.553	16.402	15.776	19.139	19.214	19.735	22.737	16.49	23.263	37.482	35.343	36.525	37.098	35.098	35.714	34.882	34.616	37.369	48.694	35.461	37.473	31.892	24.52	24.665	28.104	24.896	24.576	25.206	28.075	28.614	28.369	28.724	30.133	73.084	64.453	65.371	64.692	63.735	63.467	64.169	66.527	64.586	63.318	64.671	66.982
12.3333	740	14.359	12.773	13.52	16.665	16.698	16.2	20.075	20.11	20.367	23.651	17.578	24.286	39.688	37.241	38.531	38.761	37.155	37.757	36.853	36.553	39.927	51.41	37.878	39.527	32.082	25.831	26.196	28.116	25.894	25.712	26.404	27.398	28.271	27.61	28.816	30.355	77.72	68.502	69.557	68.722	68.01	67.606	68.504	70.953	69.106	67.851	69.294	71.688
12.6667	760	14.427	12.98	13.551	17.176	17.225	16.755	20.835	20.875	21.475	24.927	18.394	25.431	41.914	39.396	40.263	41.02	39.165	40.02	39.143	38.761	41.712	53.822	39.51	41.629	34.224	26.771	27.767	30.265	28.014	27.782	28.225	29.4	30.073	29.518	29.676	31.41	81.659	71.837	73.182	72.424	71.6	71.347	72.243	74.718	72.749	71.741	72.867	75.504
13	780	14.667	13.149	13.722	17.724	17.757	17.506	21.904	22.131	22.584	26.247	19.376	27.104	44.149	41.02	42.184	42.91	41.529	42.08	41.19	40.88	43.914	55.275	42.047	43.51	36.175	27.827	29.329	32.131	29.851	29.62	30.302	31.443	32.096	31.384	31.594	33.584	84.673	74.7	75.827	75.147	74.653	73.875	75.196	77.839	75.816	74.492	75.904	78.388
13.3333	800	14.745	13.245	14.033	18.384	18.224	18.147	23.025	23.073	23.551	27.596	20.469	28.484	46.273	43.318	44.52	45.298	43.455	44.21	43.437	43.049	46.251	57.212	44.467	46.065	38.057	26.104	31.143	33.882	31.582	31.398	32.165	33.443	33.855	33.169	33.182	35.155	86.753	76.649	77.847	77.204	76.773	76.192	77.547	80.271	77.988	76.573	78.441	80.976
13.6667	820	14.89	13.576	14.314	19.01	18.92	18.69	23.908	24.045	24.424	28.684	21.575	27.516	48.696	45.547	46.463	47	45.806	46.553	45.718	45.114	48.382	59.714	45.647	48.455	40.004	27.89	33.018	35.9	33.48	33.406	34.282	35.245	35.567	34.876	35.133	37.143	88.294	77.941	79.471	78.757	78.314	77.849	79.096	81.829	79.637	78.227	80.269	82.708
14	840	15.167	13.463	14.337	19.457	19.573	19.224	24.741	24.965	25.4	29.984	23.008	28.896	51.027	47.378	48.671	49.488	48.165	48.818	48.159	47.575	50.375	61.929	47.9	50.618	41.512	29.498	34.765	37.741	35.471	35.412	36.241	37.004	37.502	36.763	36.708	38.849	89.38	78.896	80.375	79.527	79.143	78.714	79.937	82.661	80.453	79.137	80.939	83.422
14.3333	860	15.269	13.61	14.496	20.167	20.243	19.863	26.188	26.129	26.494	31.32	24.188	30.435	53.551	49.637	51.196	51.798	50.359	51.206	50.286	49.508	52.341	64.169	50.89	52.884	42.949	31.284	36.592	39.525	37.365	37.182	38.033	39.161	39.488	38.927	38.741	40.808	89.708	79.616	81.151	80.365	79.865	79.676	80.794	83.527	81.304	79.745	81.478	84.116
14.6667	880	15.437	14.004	14.747	20.941	21.155	20.765	27.661	27.853	27.943	32.386	25.486	32.069	56.247	51.367	52.92	53.998	52.604	53.363	52.51	51.851	54.41	65.996	52.627	55.088	45.906	33.082	38.296	41.378	39.371	39.337	40.102	40.857	41.727	40.318	40.624	42.584	90.778	80.171	81.763	80.775	80.416	79.906	80.992	83.849	81.837	80.082	81.947	84.876
15	900	15.565	13.876	14.873	21.318	21.863	21.261	28.747	28.892	29.088	33.635	27.184	33.624	58.88	53.702	55.41	56.169	55.008	55.761	54.688	54.033	56.657	67.747	54.975	57.392	47.904	34.849	40.496	43.406	41.355	41.239	42.108	42.959	43.067	42.584	42.755	44.814	91.294	80.782	82.296	81.216	80.924	80.433	81.443	84.429	82.204	80.453	82.455	85.282
15.3333	920	15.851	14.1	14.843	22.143	22.424	22.065	30.406	30.712	30.72	35.502	28.776	35.718	61.302	56.135	57.371	58.486	57.806	58.369	57.049	56.71	59.459	70.271	57.233	59.573	50.4	36.637	42.575	45.6	43.651	43.402	44.151	45.269	45.735	44.575	44.663	46.967	91.912	81.053	82.653	81.41	81.057	80.906	81.767	84.639	82.204	80.504	82.473	85.227
15.6667	940	15.927	14.167	14.971	22.894	23.184	22.91	30.878	30.984	32.073	37.337	30.308	37.445	62.957	57.778	59.173	60.249	59.488	60.153	58.91	58.431	61.11	71.839	58.822	61.478	52.3	38.271	44.571	47.725	45.518	45.733	46.361	47.482	47.429	46.496	46.684	48.692	92.02	81.492	83.022	81.657	81.386	80.945	81.912	84.894	82.412	80.769	82.61	85.382
16	960	16.059	14.555	15.312	23.937	24.247	23.886	32.673	32.473	32.492	39.286	32.163	39.329	66.141	60.686	61.841	63.082	61.798	62.559	61.463	60.598	63.269	73.349	61.618	64.008	55.18	40.296	46.918	49.663	47.773	47.665	48.388	49.402	49.243	48.612	48.59	50.655	92.612	81.951	83.476	82.225	81.916	81.461	82.333	85.28	83.063	81.186	82.935	85.745
16.3333	980	16.178	14.437	15.382	24.369	24.914	24.61	34.059	34.047	34.133	41.218	33.906	41.18	68.057	62.447	63.918	64.673	63.816	64.398	63.169	62.565	64.953	74.345	63.624	65.998	56.216	42.324	48.829	52.012	50.016	49.918	50.643	51.492	51.673	50.735	50.81	52.937	93.104	82.302	83.69	82.261	82.086	81.778	82.469	85.529	83.32	81.343	83.129	86.037
16.6667	1000	16.061	14.661	15.459	25.241	25.896	25.731	35.884	36.063	35.829	43.196	35.873	43.125	70.753	64.022	65.392	66.341	65.784	66.055	64.994	64.318	67.147	75.418	64.945	67.549	59.212	44.216	51.327	54.071	52.11	52.116	52.927	54.053	53.918	52.867	53.051	55.078	93.261	82.284	83.898	82.484	82.32	81.892	82.643	85.467	83.135	81.171	83.188	86.337
17	1020	16.212	14.796	15.698	26.312	26.861	26.869	37.596	37.804	37.694	45.151	37.749	44.878	72.38	66.004	67.571	68.718	67.994	68.143	66.753	66.388	68.969	77.039	67.502	69.575	61.302	46.31	53.202	55.849	54.333	54.296	54.91	55.584	55.884	55.031	55.269	57.469	93.575	82.682	84.48	82.973	82.345	82.22	82.998	85.988	83.578	81.676	83.714	86.651
17.3333	1040	16.498	15.041	15.963	27.333	28.092	27.735	39.376	39.633	39.492	46.961	39.692	46.747	74.725	68.345	69.863	70.404	69.657	69.878	68.629	68.143	70.71	78.312	69.388	71.408	63.42	48.214	55.578	58.829	56.78	56.676	57.202	57.812	58.284	57.153	57.369	59.292	93.927	82.973	84.551	83.149	82.816	82.471	83.28	86.296	83.8	81.839	84.01	86.786
17.6667	1060	16.729	15.298	16.178	28.063	29.014	28.749	41.312	41.306	41.296	49.116	41.637	48.812	76.882	70.412	71.802	72.276	71.308	71.8	70.022	69.796	72.171	79.384	71.167	73.482	66.247	50.769	57.68	60.892	59.071	58.951	59.576	59.963	60.643	59.571	59.567	61.749	94.094	83.102	84.759	83.698	83.108	82.98	83.729	86.616	84.314	82.025	84.151	87.435
18	1080	16.904	15.645	16.008	28.778	29.669	29.349	43.145	43.267	43.045	50.951	43.531	50.535	78.933	71.52	72.967	73.516	73.053	73.137	71.086	70.869	73.575	79.447	72.047	74.494	69.051	52.8	59.886	62.657	61.384	61.149	61.722	61.918	62.49	61.741	61.816	64.088	94.541	83.475	85.076	83.855	83.384	83.118	83.988	86.882	84.849	82.41	84.676	87.48
18.3333	1100	17.322	15.865	16.398	29.825	30.588	30.561	45.127	45.161	45.186	53.118	45.429	52.624	80.535	73.018	74.488	75.1	74.467	73.735	72.288	72.439	75.049	79.865	73.475	75.567	71.755	54.808	62.304	65.239	63.684	63.445	63.902	64.1	64.7	63.935	64.286	66.543	94.825	83.855	85.418	84.422	83.975	83.59	84.465	87.439	84.939	82.769	84.816	87.978
18.6667	1120	17.625	16.316	16.737	31.039	31.571	31.541	46.667	46.5	46.59	54.857	47.255	54.555	81.525	74.255	75.751	76.073	75.394	74.514	73.176	72.975	75.71	80.341	74.651	76.88	73.025	56.424	64.173	67.702	65.622	65.433	65.659	65.498	66.739	65.804	66.245	68.657	95.186	84.153	85.598	84.335	84.167	83.751	84.629	87.794	85.359	82.904	85.18	88.165
19.3333	1160	18.327	16.906	17.553	33.5	34.341	34.178	50.463	50.31	50.284	59.061	51.227	58.618	83.735	76.62	78.124	78.073	77.135	76.347	74.92	74.222	77.643	80.676	76.682	78.806	78.076	60.931	68.453	71.29	70.012	69.629	69.822	69.81	71.094	70.294	70.518	72.722	95.718	84.49	86.151	85.347	84.62	84.394	85.373	88.38	85.884	83.806	86.139	89.171
19.6667	1180	18.733	17.235	18.01	34.778	35.743	35.596	52.178	52.006	51.971	61.002	53.033	60.749	84.816	77.21	78.678	78.61	78.169	77.394	75.498	74.875	78.363	80.976	77.467	79.5	80.745	62.827	70.657	73.404	71.759	71.488	71.694	71.931	73.169	72.161	72.692	75.084	95.898	84.727	86.363	85.278	84.751	84.78	85.708	88.72	86.092	84.102	86.416	89.369
20	1200	19.165	17.702	18.469	36.261	37.108	36.99	53.982	54.075	53.676	63.375	55.094	62.951	86.106	77.998	79.531	79.459	79.241	78.212	76.435	75.627	79.19	81.429	78.227	80.359	82.078	64.943	72.616	75.851	73.961	72.978	73.318	73.896	75.116	73.996	74.827	77.333	96.278	85.137	86.863	85.8	85.369	84.959	86.037	89.188	86.741	84.267	86.62	89.718
20.3333	1220	19.549	18.086	18.747	37.651	38.678	38.424	55.629	55.686	55.639	65.514	57.022	64.922	86.661	78.402	79.786	79.912	79.839	78.91	76.908	76.324	79.712	81.916	78.637	80.58	83.869	67.341	74.425	77.047	75.445	74.682	74.929	74.908	76.849	75.749	76.59	79.141	96.565	85.278	86.892	85.841	85.58	85.165	86.373	89.353	87.055	84.822	86.741	89.98
21	1260	20.388	18.775	19.539	40.341	41.557	41.494	59.339	59.341	59.271	69.453	61.029	69.369	88	79.616	80.784	81.308	80.873	80.176	78.19	77.747	81.041	82.878	79.898	82.188	87.657	70.967	77.588	79.196	77.718	77.375	77.682	77.733	79.553	78.635	79.5	82.002	96.812	85.5	87.163	86.29	86.175	85.635	86.763	89.998	87.643	85.147	87.671	90.986
21.3333	1280	20.688	19.112	20.004	41.904	43.035	42.849	61.478	61.231	61.255	71.761	63.112	71.612	89.078	80.416	81.853	82.255	81.69	80.812	78.875	78.082	81.553	83.247	80.827	82.861	89.327	72.71	79.037	80.822	78.824	78.476	78.91	79.198	80.9	79.841	80.878	83.396	97.214	85.759	87.398	86.59	86.298	85.837	87.149	90.237	87.9	85.422	87.967	90.922
21.6667	1300	21.075	19.524	20.253	43.451	44.471	44.355	63.155	63.106	62.949	73.471	64.949	73.488	89.649	80.498	81.839	82.41	82.251	80.9	79.073	78.559	81.855	83.549	81.265	83.137	89.469	74.167	79.69	82.031	79.306	79.58	79.618	80.175	81.88	80.92	81.969	84.567	97.041	85.843	87.5	86.941	86.743	86.265	87.553	90.514	88.11	85.765	88.227	91.345
22	1320	21.537	19.914	20.555	44.798	46.088	45.945	64.904	64.816	64.782	75.794	66.953	75.59	89.973	80.775	82.129	82.684	82.206	81.798	79.635	79.143	82.192	83.827	81.663	83.663	90.259	75.678	80.884	82.769	80.565	80.606	80.802	80.976	82.81	81.51	82.524	85.376	97.269	86.078	87.563	87.025	86.827	86.453	87.735	90.904	88.378	86.029	88.524	91.718
22.3333	1340	21.827	20.392	21.057	46.241	47.608	47.388	66.918	66.765	66.573	77.794	69.014	77.749	90.616	81.251	82.716	83.41	82.861	82.157	80.22	79.433	82.404	84.265	82.265	84.006	91.182	76.892	82.173	83.165	81.229	81.304	81.692	81.904	83.769	82.743	83.927	86.553	97.647	86.549	87.933	87.467	87.131	86.831	88.047	91.124	88.718	86.139	88.71	91.951
22.6667	1360	22.304	20.822	21.447	47.753	49.016	48.965	68.845	68.747	68.698	79.796	71.037	79.776	90.241	81.361	82.812	83.635	83.394	82.506	80.29	79.708	82.639	84.573	82.602	84.265	92.28	77.594	82.72	83.443	81.931	81.873	82.02	82.378	84.422	83.39	84.682	87.025	98.022	86.727	88.357	87.855	87.492	87.175	88.365	91.671	88.975	86.557	89.045	92.355
23	1380	22.851	21.137	21.951	49.039	50.431	50.467	70.678	70.39	70.445	81.484	72.861	81.708	91.371	81.663	83.11	84.024	83.72	83.063	80.755	80.129	83.057	84.843	82.72	84.837	93.38	78.782	83.573	84.233	82.796	82.667	83.012	83.361	84.953	84.227	85.52	87.947	98.41	86.935	88.451	87.929	87.72	87.32	88.633	91.814	89.363	87.01	89.58	92.696
23.3333	1400	23.21	21.388	22.316	50.549	51.92	51.69	72.508	72.1	72.29	83.288	74.896	83.498	91.792	81.906	83.412	83.888	83.641	83.249	81.161	80.598	83.257	85.112	82.755	84.808	94.002	79.496	84.067	85	83.488	83.182	83.602	83.82	85.343	84.435	85.855	88.659	98.467	87.247	88.731	88.343	87.79	87.592	88.91	91.963	89.555	87.024	89.42	92.859
23.6667	1420	23.543	21.8	22.486	51.886	53.22	52.978	74.031	73.775	73.722	84.792	76.494	84.898	91.588	81.959	83.259	84.151	83.78	83.21	80.904	80.386	83.335	85.2	82.567	84.68	94.555	80.316	84.502	85.38	83.753	83.606	83.906	84.035	85.82	85.078	86.755	88.996	98.692	87.341	88.824	88.178	87.927	87.459	88.943	92.055	89.729	87.104	89.694	92.847
24	1440	24.006	22.137	22.924	53.29	54.6	54.492	75.818	75.345	75.333	86.312	78.357	86.588	91.959	82.414	83.72	84.32	84.316	83.549	81.616	80.631	83.4	85.398	82.802	85	94.829	81.196	84.865	85.98	84.196	84.239	84.616	84.812	86.563	85.276	87.092	89.637	98.925	87.412	89.051	88.565	88.161	87.975	89.2	92.418	89.837	87.584	89.992	93.284
24.3333	1460	24.294	22.655	23.471	54.524	56.002	55.845	77.231	76.68	76.925	87.547	79.769	87.833	92.175	82.759	84.037	84.471	84.267	83.696	81.759	81.027	83.327	85.559	82.716	85.288	94.996	81.72	85.243	86.529	84.941	84.453	84.896	85.237	87.047	85.618	87.341	89.959	99.071	87.573	89.345	88.631	88.288	88.2	89.455	92.565	90.141	87.675	90.127	93.396
24.6667	1480	24.708	23.041	23.684	56.043	57.412	57.302	78.753	78.345	78.373	88.584	81.445	88.935	92.676	82.882	84.39	84.604	84.759	84.261	82.096	81.141	83.367	85.782	82.645	85.418	95.476	82.404	85.471	87.033	85.049	85.084	85.376	85.763	87.894	85.763	87.635	90.19	99.331	87.776	89.5	88.9	88.6	88.322	89.686	92.733	90.382	88.186	90.492	93.72
25	1500	25.227	23.333	23.939	57.525	58.886	58.633	80.212	79.616	79.825	89.78	82.843	90.32	92.637	83.133	84.545	84.918	84.718	84.406	82.288	81.484	83.408	85.596	82.769	85.704	95.502	82.714	85.788	87.41	85.555	85.273	85.6	85.873	87.865	86.006	87.847	90.404	99.302	87.861	89.598	88.922	88.761	88.422	89.778	92.91	90.453	88.212	90.625	93.929
25.3333	1520	25.724	23.886	24.688	58.688	60.286	60.082	81.559	81.212	81.331	90.878	84.112	91.227	92.957	83.247	84.767	84.796	84.514	84.814	82.618	81.892	83.62	85.91	82.867	85.739	95.79	83.233	86.32	87.847	86.231	86.027	85.971	86.737	87.441	86.159	87.618	90.386	99.869	88.241	89.778	89.433	89.039	88.516	90.19	93.208	90.475	88.282	90.876	93.978
25.6667	1540	25.959	24.122	24.904	60.155	61.749	61.418	82.639	82.202	82.096	91.904	85.453	91.971	93.555	83.755	85.239	85.355	85.094	85.225	82.741	81.918	83.843	85.922	83.424	86.337	96.192	83.735	86.62	88.365	86.492	86.147	86.335	86.763	87.333	86.18	87.69	90.486	99.718	88.255	89.9	89.351	89.245	88.667	90.263	93.422	90.778	88.537	91.155	94.388
26	1560	26.451	24.594	25.265	61.363	63.037	62.869	83.833	83.208	83.206	92.384	86.282	92.776	93.569	83.802	85.202	85.078	85.127	85.341	82.747	82.063	83.796	85.947	83.459	86.088	96.451	83.892	86.722	88.602	86.714	86.198	86.537	87.265	86.959	85.902	87.635	90.288	99.922	88.376	90.151	89.586	89.196	88.975	90.259	93.275	91.225	88.708	91.082	94.494
26.3333	1580	26.935	25.149	25.941	63.027	64.72	64.7	85.231	84.335	84.545	93.275	87.129	93.502	93.994	84.265	85.743	85.339	85.278	85.373	83.118	82.331	83.91	86.239	83.667	86.504	96.827	84.157	87.347	89	86.943	87.008	87.063	87.4	87.206	86.263	87.898	90.741	100.263	88.571	90.255	89.788	89.829	89.229	90.614	93.496	91.02	88.975	91.406	94.778
26.6667	1600	27.408	25.42	25.98	64.247	66.067	65.925	85.737	85.198	85.327	93.975	87.847	93.998	94.169	84.075	85.749	85.363	85.516	85.604	83.322	82.582	84.325	86.075	83.896	86.61	96.545	84.339	87.586	88.992	87.1	86.9	87.22	87.41	87.502	86.257	88.092	91.292	100.427	88.549	90.31	89.798	89.612	89.141	90.639	93.69	91.365	88.945	91.502	94.941
27	1620	28.024	25.749	26.569	65.531	67.202	67.076	86.578	86.014	86.29	94.547	88.771	94.706	94.408	84.576	86.022	85.641	85.7	85.694	83.365	82.808	84.373	86.318	84.341	86.91	97.361	84.971	87.722	89.453	87.506	87.253	87.535	87.99	87.629	86.655	88.739	91.947	100.275	88.733	90.331	89.867	89.714	89.345	90.722	94.035	91.482	89.137	91.778	95.018
27.3333	1640	28.355	26.322	27.041	66.914	68.541	68.341	87.212	86.731	86.839	94.755	89.239	95.145	94.21	84.804	85.988	85.298	85.694	85.575	83.39	82.729	84.441	85.99	84.157	86.755	97.178	84.818	88.037	89.382	87.686	87.324	87.688	88.065	88.296	86.855	89.339	91.418	100.541	88.918	90.606	90.022	89.794	89.512	90.859	94.008	91.586	89.214	91.755	95.053
27.6667	1660	28.733	26.761	27.516	68.114	69.996	69.839	88.225	87.745	87.906	95.202	89.906	95.537	94.739	85.049	86.269	86.057	85.984	86.253	83.678	82.906	84.727	86.59	84.376	86.922	97.9	85.371	88.329	89.545	88.069	87.712	88.088	88.592	88.306	87.249	89.01	92.345	100.831	89.045	90.533	90.406	90.3	89.671	91.41	94.38	91.935	89.359	92.022	95.592
28	1680	29.365	27.325	28.067	69.288	71.153	70.978	88.802	88.278	88.414	95.978	90.629	96.131	94.861	84.859	86.478	86	85.967	85.878	83.645	82.904	84.853	86.596	84.565	86.796	97.629	85.376	88.776	89.851	88.135	88.029	88.4	88.598	88.39	87.457	89.241	91.751	101.114	89.32	91.184	90.606	90.337	89.9	91.435	94.465	91.992	89.712	92.304	95.622
28.3333	1700	29.725	27.692	28.502	70.486	72.339	72.12	89.245	88.767	88.922	96.433	90.941	96.39	94.68	84.943	86.51	85.99	85.902	86.165	83.692	82.829	84.543	86.535	84.455	87.149	97.875	85.78	88.655	89.912	88.335	88.231	88.233	88.878	88.827	87.773	89.612	92.308	100.955	89.412	91.092	90.455	90.141	89.937	91.373	94.482	91.904	89.525	92.429	95.653
28.6667	1720	30.461	28.427	28.88	71.724	73.469	73.229	90.024	89.237	89.663	96.573	91.398	96.761	95.153	85.006	86.724	86.024	86.1	86.412	83.957	83.151	84.637	86.725	84.812	87.308	98.367	85.886	88.835	90.149	88.629	88.471	88.576	89.267	88.996	87.71	89.651	92.771	101.19	89.237	91.104	90.625	90.678	90.225	91.755	94.88	92.184	89.833	92.427	95.92
29	1740	30.978	28.641	29.518	72.753	74.514	74.222	90.551	89.771	90.092	97.045	91.824	97.114	94.975	85.327	86.651	86.184	85.986	86.261	83.949	83.265	84.904	86.796	84.727	87.369	98.773	86.32	89.216	90.337	88.808	88.604	88.927	89.375	89.051	88.461	89.831	92.767	101.316	89.527	91.443	90.927	90.722	90.147	91.822	94.998	92.461	90.163	92.769	96.1
29.3333	1760	31.29	29.29	29.755	73.712	75.337	75.049	90.957	90.422	90.522	97.208	92.039	97.229	95.375	85.253	86.716	86.259	86.227	86.422	84.139	83.141	84.947	86.929	84.767	87.469	99.094	86.367	89.365	90.527	89.041	88.739	89.104	89.555	89.571	88.212	90.302	92.847	101.424	89.584	91.449	90.802	90.6	90.327	91.853	95.108	92.257	90.169	92.794	96.078
29.6667	1780	32.035	29.38	30.457	74.453	76.349	76.143	91.424	90.506	90.849	97.49	92.645	97.51	95.227	85.308	86.733	86.176	86.059	86.398	84.065	83.392	84.973	86.876	84.925	87.445	99.135	86.345	89.378	90.61	89.047	88.888	89.102	89.492	89.58	88.457	90.237	93.125	101.3	89.68	91.325	91.018	90.833	90.531	92.098	95.002	92.594	90.38	92.867	96.145
30	1800	32.518	29.973	30.943	75.588	77.369	77.043	91.902	90.949	91.337	97.763	92.686	97.922	95.524	85.592	87.063	86.525	86.49	86.898	84.239	83.471	85.275	86.922	85.084	87.641	99.376	86.792	89.576	90.898	89.343	89.249	89.484	89.757	89.927	88.71	90.498	93.531	101.631	89.814	91.52	91.167	90.875	90.543	92.149	95.408	92.59	90.382	92.847	96.473
30.3333	1820	32.955	30.727	31.437	76.176	78.071	77.953	92.206	91.447	91.71	98.069	93.098	98.055	95.133	85.582	86.92	86.402	86.414	86.565	84.065	83.288	85.112	86.99	85.167	87.624	99.016	86.847	89.833	90.971	89.384	89.214	89.471	89.763	90.188	89.041	90.545	93.224	102.027	89.906	91.849	91.324	91.122	90.633	92.061	95.343	92.741	90.484	93.053	96.269
30.6667	1840	33.425	31.155	31.8	77.218	78.89	78.573	92.516	91.692	91.976	98.463	93.553	98.257	95.765	85.692	87.102	86.576	86.622	86.959	84.296	83.716	85.382	87.343	85.278	87.971	99.429	87.21	90.022	91.357	89.778	89.692	89.735	90.139	90.292	88.953	90.839	93.439	101.941	90.159	91.747	91.535	91.182	90.873	92.296	95.475	93.1	90.643	93.084	96.675
31	1860	34.09	31.41	32.39	78.112	80.043	79.614	92.684	92.069	92.614	98.488	93.724	98.553	95.669	86.267	87.08	86.504	86.337	87.151	84.561	83.833	85.427	87.382	85.3	87.9	99.259	87.296	90.316	91.196	89.906	89.782	89.908	90.512	90.147	89.088	91.037	93.404	102.051	90.237	92.008	91.361	91.373	90.973	92.512	95.702	93.12	90.743	93.316	96.8
31.3333	1880	34.563	31.924	32.825	78.796	80.557	80.235	93.161	92.445	92.924	98.837	93.886	98.663	95.592	85.865	87.392	86.649	86.645	87.029	84.488	83.806	85.747	87.312	85.312	88.024	99.659	87.545	90.355	91.553	89.912	89.692	89.68	90.359	90.482	89.469	91.18	93.802	102.133	90.394	91.827	91.676	91.51	90.955	92.604	95.847	93.029	90.796	93.498	96.849
31.6667	1900	35.049	32.414	33.231	79.475	81.165	80.851	93.196	92.455	92.869	98.792	94.025	98.814	95.992	86.018	87.469	86.922	86.933	87.151	84.671	83.784	85.567	87.49	85.598	88.086	99.551	87.671	90.553	91.288	90.135	89.731	90.045	90.5	90.539	89.504	91.078	93.718	102.127	90.422	91.988	91.839	91.465	91.288	92.618	95.767	93.225	90.971	93.512	97.118
32	1920	35.494	33.141	34.112	80.139	81.614	81.592	93.514	92.939	93.161	99.139	94.437	98.884	95.733	85.869	87.122	86.72	86.612	87.002	84.504	83.633	85.484	87.49	85.525	88.055	99.847	87.776	90.425	91.535	90.082	89.79	90.073	90.535	90.249	89.339	91.545	93.794	102.298	90.459	92.267	91.804	91.596	91.363	92.694	95.896	93.4	91.039	93.569	97.045
32.3333	1940	35.975	33.467	34.463	80.863	82.431	82.188	93.92	93.039	93.478	99.486	94.551	99.251	95.829	86.153	87.494	87.002	86.804	87.176	84.514	83.824	85.829	87.539	85.718	88.145	100.169	88.367	90.688	91.79	90.225	89.843	90.145	90.614	90.865	89.667	91.255	93.951	102.476	90.708	92.447	91.939	91.712	91.31	92.763	96.298	93.606	91.308	93.871	97.384
32.6667	1960	36.694	34.002	34.8	81.453	82.953	82.98	94.002	93.239	93.508	99.541	94.784	99.353	95.867	86.049	87.261	86.961	86.71	87.21	84.535	83.814	85.467	87.612	85.612	88.076	100.149	88.163	90.702	91.706	90.129	89.902	89.992	90.625	90.682	89.604	91.469	93.8	102.359	90.592	92.243	92.094	91.88	91.376	93.173	96.004	93.522	91.055	93.676	97.333
33	1980	37.288	34.508	35.663	82.143	83.829	83.502	94.316	93.49	93.902	99.616	95.061	99.496	96.022	86.049	87.688	87.522	87.016	87.294	84.814	84.184	85.98	87.984	85.639	88.406	100.437	88.418	91.033	92.045	90.357	90.302	90.284	90.637	90.69	89.661	91.578	94.2	102.596	90.7	92.48	92.245	91.867	91.563	93.247	96.3	93.582	91.259	94.008	97.312
33.3333	2000	37.733	35.118	35.994	82.651	84.21	84.008	94.439	93.635	94.029	99.786	95.059	99.776	96.302	86.116	87.816	87.273	87.135	87.627	84.873	84.18	86.102	87.9	85.998	88.457	100.457	88.696	90.827	92.035	90.331	90.255	90.449	91.051	90.663	89.741	91.616	94.124	102.541	90.684	92.416	92.198	91.988	91.516	93.129	96.402	93.727	91.439	94.059	97.561
33.6667	2020	38.292	35.431	36.433	83.306	85.159	84.771	94.525	93.678	94.025	99.947	95.188	99.725	96.014	86.198	87.757	87.324	87.171	87.604	85.037	84.333	85.99	87.927	85.978	88.363	100.324	88.667	90.814	91.922	90.476	90.398	90.431	90.945	90.639	89.551	91.473	94.194	102.882	90.702	92.653	92.329	91.827	91.406	93.131	96.31	93.822	91.58	93.947	97.369
34	2040	38.675	35.953	36.99	83.682	85.329	84.718	94.647	93.884	94.141	99.924	95.398	99.622	96.022	85.927	87.692	87.206	86.969	87.58	84.876	84.222	86.104	87.998	85.841	88.329	100.069	88.573	90.924	91.459	90.312	90.043	90.38	90.694	90.865	89.771	91.49	94.059	103.051	90.814	92.586	92.473	91.914	91.518	93.186	96.578	93.853	91.545	94.041	97.506
34.3333	2060	39.306	36.627	37.776	84.294	86	85.541	95.173	94.339	94.504	100.206	95.516	99.945	96.445	86.359	87.9	87.522	87.586	87.702	85.263	84.475	86.184	88.247	86.188	88.808	100.5	88.839	91.082	91.704	90.445	90.249	90.541	91.029	90.99	89.963	91.755	94.341	103.161	90.929	92.898	92.451	92.176	92.016	93.28	96.62	94.043	91.661	94.096	97.749
34.6667	2080	39.633	37.308	38.306	84.741	86.586	86.067	95.202	94.406	94.749	100.312	95.588	100.22	96.529	86.445	87.855	87.414	87.245	87.796	85.463	84.512	86.275	88.455	86.082	88.888	100.335	89.025	91.053	91.769	90.79	90.416	90.651	91.357	90.953	90.047	91.698	94.378	103.09	91.249	92.827	92.418	92.255	91.737	93.455	96.861	94.02	91.943	94.569	97.892
35	2100	40.273	37.861	38.857	85.116	86.835	86.524	95.153	94.414	94.857	100.263	95.622	100.173	96.037	86.249	87.812	87.578	87.496	87.608	85.229	84.343	86.28	88.467	86.153	88.988	100.298	88.839	91.249	91.592	90.496	90.392	90.671	91.243	91.206	89.882	91.769	94.353	102.82	90.998	92.739	92.631	92.325	91.875	93.671	96.737	94.169	91.986	94.465	98.075
35.3333	2120	40.98	38.176	39.4	85.649	87.298	86.947	95.404	94.518	95.039	100.5	95.833	100.378	96.467	86.688	88.102	87.71	87.28	87.62	85.208	84.496	86.518	88.363	86.061	89	100.308	88.855	91.212	91.669	90.529	90.361	90.561	91.11	91.188	90.016	91.906	94.265	102.994	90.929	92.941	92.553	92.269	91.902	93.51	96.912	94.237	91.792	94.575	97.924
35.6667	2140	41.549	38.608	39.829	86.355	87.904	87.288	95.684	94.816	95.061	100.451	96.067	100.453	96.957	86.861	88.418	87.912	87.647	88.12	85.59	84.643	86.706	88.608	86.555	89.204	100.494	89.204	91.269	91.62	90.665	90.471	90.625	91.094	91.208	90.263	92.363	94.598	103.535	91.443	92.933	92.639	92.527	92.173	93.702	97.022	94.145	91.91	94.622	98.137
36	2160	42.225	39.351	40.537	86.661	88.122	87.665	95.657	94.908	95.075	100.569	96.012	100.216	96.818	86.918	88.335	87.686	87.539	87.973	85.584	84.769	86.663	88.473	86.353	89.002	100.667	88.994	91.308	91.816	90.529	90.347	90.645	91.092	91.288	89.988	92.092	94.439	103.398	91.241	93.067	92.82	92.514	92.225	93.669	96.953	94.004	91.912	94.539	97.818
36.3333	2180	43.049	40.361	41.302	87.12	88.641	88.341	95.941	95.127	95.331	100.776	96.382	100.814	97.284	87.241	88.675	88.129	87.918	88.275	85.776	84.965	87.022	89.014	86.573	89.435	100.775	89.125	91.355	91.582	90.947	90.692	90.745	91.355	91.224	90.273	92.18	94.651	103.498	91.475	93.014	92.804	92.665	92.288	93.894	97.182	94.441	92.047	94.804	98.292
36.6667	2200	43.62	40.763	42.118	87.739	89.153	88.512	96.222	95.306	95.661	100.884	96.447	100.688	97.706	87.68	89.173	88.398	88.243	88.571	85.955	85.347	87.269	89.071	86.949	89.52	100.706	89.455	91.416	91.827	90.922	90.702	90.931	91.461	91.378	90.465	92.61	94.769	103.422	91.68	93.186	92.802	92.725	92.4	93.945	97.225	94.429	92.339	94.782	98.243
37	2220	43.724	40.796	42.369	87.878	89.269	88.882	96.073	95.349	95.531	100.831	96.514	100.761	97.584	87.594	88.878	88.32	88.171	88.871	86.016	85.225	87.19	88.973	86.831	89.512	100.58	89.051	91.439	92.176	90.963	90.559	90.951	91.522	91.539	90.373	92.116	95	103.353	91.429	93.198	92.986	92.757	92.429	93.9	97.225	94.518	92.159	94.804	98.445
37.3333	2240	43.747	40.994	42.52	88.047	89.71	89.341	96.033	95.414	95.851	100.859	96.422	100.588	97.829	87.545	88.99	88.588	88.531	88.743	85.914	85.371	87.096	89.376	86.773	89.367	100.629	89.006	91.616	91.986	90.92	90.894	90.835	91.506	91.329	90.161	92.408	94.796	103.69	91.355	93.129	93.102	92.567	92.322	93.947	97.208	94.529	92.157	94.671	98.373
37.6667	2260	44.586	41.569	42.943	88.431	89.902	89.457	96.345	95.596	96.018	100.884	96.327	100.924	97.763	88.096	89.308	88.68	88.729	88.937	86.496	85.451	87.52	89.249	87.178	89.867	100.931	89.306	91.573	91.888	90.933	90.641	90.914	91.496	91.504	90.437	92.378	95.065	103.545	91.606	93.369	92.788	92.788	92.373	94.122	97.247	94.606	92.253	94.929	98.525
38	2280	45.218	42.302	43.484	89.112	90.459	89.91	96.461	95.724	96.1	101.037	96.724	101.057	98	87.996	89.539	89.224	88.753	89.3	86.465	85.735	87.576	89.775	87.459	90.102	100.878	89.345	91.578	91.894	91.051	90.884	91.241	91.61	91.602	90.58	92.747	95.08	103.476	91.747	93.318	93.229	92.914	92.498	94.249	97.222	94.727	92.527	95.139	98.506
38.3333	2300	45.545	42.427	44.049	89.073	90.694	90.169	96.447	95.612	96.129	100.988	96.708	100.951	98.231	88.067	89.737	89.133	88.876	89.443	86.61	85.908	87.659	89.802	87.331	89.959	100.982	89.278	91.749	92.125	91.351	91.124	91.375	91.849	91.682	90.684	92.873	95.118	103.678	91.69	93.625	93.249	93.025	92.608	94.153	97.382	94.635	92.324	94.984	98.545
38.6667	2320	45.941	43.104	44.4	89.724	91.014	90.522	96.747	95.951	96.378	101.404	97.006	101.078	98.194	88.198	89.773	89.539	89.167	89.602	86.757	86.218	88.016	90.059	87.788	90.52	101.253	89.675	92.124	92.453	91.406	91.188	91.618	91.816	91.796	90.824	92.812	95.349	103.912	91.829	93.606	93.21	92.951	92.624	94.255	97.576	94.802	92.659	95.108	98.488
39	2340	46.471	43.571	44.88	89.812	91.388	90.904	96.471	95.837	96.173	101.09	96.818	101.122	98.502	88.276	89.831	89.847	89.504	90.016	87.304	86.425	88.155	90.224	87.841	90.437	101.357	89.414	92.135	92.771	91.635	91.414	91.675	92.192	92.041	91.065	93.184	95.292	103.904	91.669	93.502	93.276	93.133	92.759	94.159	97.502	94.792	92.425	95.137	98.708
39.3333	2360	46.975	43.898	45.457	90.01	91.637	91.106	96.943	96.21	96.445	101.296	96.831	101.182	98.712	88.58	90.049	89.845	89.465	90.182	87.343	86.688	88.484	90.335	88.031	90.702	101.635	89.939	92.331	92.898	91.796	91.588	91.729	92.284	92.3	91.192	93.265	95.557	103.894	91.798	93.631	93.416	93.118	92.588	94.382	97.675	94.975	92.561	95.292	98.814
39.6667	2380	47.324	44.339	45.624	90.382	91.961	91.29	96.888	96.055	96.557	101.518	97.092	101.314	98.547	88.608	90.08	89.827	89.435	89.939	87.425	86.569	88.482	90.394	88.08	90.761	101.586	89.935	92.271	92.892	91.698	91.916	91.722	92.31	92.043	91.078	93.535	95.751	103.918	91.88	93.714	93.516	93.1	92.741	94.339	97.492	94.851	92.627	95.306	98.865
40	2400	47.58	44.257	45.786	90.824	92.131	91.675	96.988	96.029	96.457	101.376	96.967	101.035	98.847	88.527	90.106	89.978	89.769	90.086	87.541	86.545	88.635	90.588	88.443	90.992	101.676	90.053	92.58	93.325	92.006	91.959	91.882	92.547	92.431	91.333	93.624	95.761	104.096	91.957	93.743	93.522	93.282	92.918	94.3	97.522	94.886	92.561	95.282	98.835
40.3333	2420	48.033	44.998	46.435	90.892	92.478	91.812	97.039	96.082	96.537	101.347	96.943	101.245	98.771	88.553	90.327	89.912	89.759	90.347	87.645	86.845	88.788	91.022	88.476	90.994	101.765	89.99	92.561	93.373	92.125	92.104	92.184	92.775	92.469	91.555	93.561	95.988	103.955	91.92	93.555	93.135	93.147	92.741	94.365	97.437	94.937	92.641	95.241	98.802
40.6667	2440	48.592	45.757	46.814	91.198	92.714	92.143	97.21	96.229	96.492	101.598	96.975	101.312	98.931	88.884	90.288	90.241	90.094	90.525	87.857	87.006	89.031	91.067	88.622	91.449	101.816	90.124	92.812	93.665	92.42	92.202	92.508	92.794	92.669	91.6	93.825	96.096	104.086	91.953	93.718	93.414	93.337	92.959	94.618	97.692	95.165	92.624	95.365	98.894
41	2460	49.412	46.078	47.437	91.375	93.004	92.208	97.335	96.359	96.925	101.569	97.261	101.469	98.716	88.751	90.406	90.214	89.951	90.516	87.778	86.935	89.206	90.953	88.573	91.418	102.092	90.525	92.759	93.861	92.373	92.216	92.167	92.802	92.869	91.627	93.743	96.241	104.241	92.12	94.08	93.533	93.245	92.918	94.469	97.739	95.247	92.757	95.284	99.016
41.3333	2480	49.669	46.345	47.931	91.688	93.045	92.537	97.6	96.71	97.118	101.955	97.331	101.514	98.971	88.947	90.514	90.216	90.376	90.565	88.035	87.318	89.384	91.135	89.059	91.794	102.386	90.496	92.967	94.139	92.684	92.282	92.659	93.137	92.896	91.878	94.351	96.643	104.3	92.261	94.022	93.645	93.502	93.233	94.635	97.873	95.253	93.049	95.655	99.222
41.6667	2500	50.084	46.741	48.208	91.875	93.325	92.792	97.469	96.708	96.994	101.827	97.333	101.488	99.078	88.822	90.576	90.433	90.108	90.522	88.292	87.376	89.28	91.208	88.955	91.641	102.48	90.647	93.178	94.135	92.671	92.386	92.608	93.198	93.239	92.22	94.216	96.724	104.188	92.225	93.927	93.673	93.341	93.09	94.463	97.72	95.327	92.931	95.547	99.045
42	2520	50.69	47.147	48.765	92.137	93.406	92.99	97.541	96.739	97.116	101.845	97.359	101.733	99.086	89.043	90.706	90.371	90.096	90.684	88.408	87.355	89.306	91.261	89.257	91.831	102.529	90.763	93.1	94.382	92.604	92.561	92.835	93.392	93.32	92.12	94.473	96.702	104.314	92.192	94.078	93.739	93.745	93.176	94.667	97.957	95.367	92.924	95.492	99.282
42.3333	2540	50.861	47.196	48.892	92.076	93.625	92.88	97.718	96.592	96.998	101.669	97.314	101.72	98.916	89	90.541	90.41	90.143	90.904	88.206	87.435	89.384	91.3	89.182	91.682	102.529	90.767	93.124	94.457	92.91	92.89	92.965	93.522	93.157	92.337	94.557	96.804	104.153	92.304	94.092	93.61	93.622	93.249	94.863	97.947	95.324	93.057	95.561	99.437
42.6667	2560	51.269	47.967	49.41	92.486	93.859	93.182	97.673	96.808	97.188	101.718	97.453	101.986	98.947	88.884	90.447	90.361	90.304	90.663	88.335	87.49	89.6	91.359	89.12	91.741	102.429	90.741	93.204	94.563	92.761	92.633	92.908	93.343	93.239	92.267	94.453	96.896	104.18	92.306	94.186	93.749	93.353	92.9	94.827	98.039	95.447	93.098	95.696	99.486
43	2580	51.425	48.102	49.659	92.569	94.237	93.355	97.7	96.582	97.225	101.892	97.353	101.661	99.141	88.882	90.553	90.38	90.229	90.569	88.398	87.618	89.527	91.48	89.096	92.082	102.543	90.908	93.22	94.794	93.106	92.953	93.098	93.61	93.498	92.537	94.602	96.994	104.529	92.186	93.973	93.847	93.582	93.141	94.878	97.908	95.282	92.998	95.631	99.137
43.3333	2600	52.159	48.608	50.108	92.812	94.482	93.637	97.712	96.912	97.233	101.865	97.651	101.622	99.329	89.104	90.78	90.676	90.639	91.139	88.698	87.71	89.545	91.79	89.535	91.908	102.924	91.124	93.582	94.843	93.229	93.116	93.08	93.759	93.529	92.612	94.853	97.133	104.645	92.559	94.149	93.824	93.704	93.275	94.951	98.227	95.537	93.218	95.737	99.322
43.6667	2620	52.425	48.71	50.433	93.322	94.382	93.673	97.802	96.959	97.367	102.022	97.59	101.663	99.284	89.149	90.759	90.631	90.52	90.941	88.39	87.5	89.471	91.647	89.533	92.11	102.7	91.169	93.551	94.924	92.892	92.81	93.153	93.578	93.676	92.79	94.955	97.235	104.675	92.41	94.222	93.927	93.676	93.216	94.78	98.171	95.58	93.186	95.839	99.406
44	2640	52.78	49.292	50.718	93.284	94.845	94.01	97.886	96.933	97.388	102.171	97.761	101.849	99.257	89.243	90.657	90.806	90.555	91.012	88.514	87.759	89.349	91.835	89.718	92.041	102.771	91.027	93.375	94.782	93.304	93.204	93.282	93.876	93.875	92.925	94.975	97.3	104.671	92.478	94.306	93.976	93.553	93.265	94.99	98.088	95.522	93.235	95.79	99.543
44.3333	2660	53.367	49.684	51.194	93.382	94.884	94.335	97.876	97.161	97.531	101.973	97.443	101.941	99.202	89.22	91.004	90.565	90.804	91.243	88.794	87.912	89.798	92	89.506	92.284	102.808	91.014	93.775	94.663	93.378	93.331	93.537	94.027	94.133	92.857	95.143	97.424	104.625	92.484	94.196	93.888	93.833	93.394	95.178	98.371	95.531	93.241	96.014	99.602
44.6667	2680	53.69	50.296	51.722	93.61	94.908	94.29	98.192	97.116	97.522	102.208	97.741	101.99	99.555	89.363	90.827	90.849	90.616	91.196	88.957	88.035	89.875	92.053	89.659	92.435	103.057	91.329	93.753	94.882	93.4	93.469	93.667	94.135	93.818	92.892	95.302	97.514	104.567	92.482	94.42	93.843	94.002	93.482	95.004	98.367	95.684	93.406	95.908	99.612
45	2700	53.976	50.361	52.025	93.596	95.135	94.48	98.025	97.088	97.524	102.1	97.463	102.01	99.512	89.251	90.739	90.747	90.655	91.131	88.812	87.902	89.855	91.792	89.492	92.345	103.106	91.165	93.698	94.786	93.263	93.178	93.627	93.784	93.837	93.033	95.031	97.624	104.79	92.586	94.196	94.145	93.657	93.39	95.153	98.386	95.502	93.439	95.982	99.396
45.3333	2720	54.478	50.733	52.145	93.827	95.198	94.433	98.08	97.3	97.545	102.29	97.88	101.9	99.49	89.178	90.8	90.72	90.635	91.349	88.806	88.01	90.027	92.124	89.792	92.549	103.261	91.429	93.724	95.09	93.527	93.184	93.584	94.165	93.982	93.045	95.314	97.651	104.743	92.351	94.478	94.024	94.045	93.512	95.078	98.318	95.62	93.186	96.102	99.655
45.6667	2740	54.935	51.067	52.684	93.943	95.359	94.588	98.276	97.376	97.606	102.463	97.906	102.073	99.527	89.502	90.986	90.9	90.684	91.21	88.886	88.035	90.225	92.302	89.88	92.775	103.357	91.518	93.837	95.133	93.482	93.414	93.898	94.143	94.022	93.149	95.469	97.816	104.865	92.72	94.48	94.227	93.929	93.543	95.208	98.449	95.908	93.308	96.098	99.859
46	2760	55.314	51.508	53.045	94.008	95.522	94.792	98.069	97.371	97.529	102.378	97.869	102.063	99.608	89.496	91.147	90.886	90.776	91.359	89.167	87.947	90.055	92.41	90.055	92.406	103.259	91.751	94.037	95.327	93.814	93.649	93.708	94.304	94.171	93.2	95.361	97.861	104.88	92.476	94.398	94.043	93.971	93.49	95.069	98.459	95.802	93.453	95.937	99.586
46.3333	2780	55.365	51.663	53.271	94.22	95.535	94.951	98.241	97.524	97.745	102.245	97.89	102.033	100.018	89.786	91.127	90.978	91.012	91.425	89.01	88.125	90.086	92.359	90.025	92.58	103.371	91.743	94.229	95.457	93.753	93.357	93.71	94.127	94.182	93.135	95.584	97.796	105.025	92.716	94.406	94.28	93.814	93.612	95.28	98.604	95.937	93.478	96.118	99.688
46.6667	2800	55.794	52.051	53.565	94.333	95.555	95.235	98.3	97.416	97.706	102.32	97.745	102.1	99.943	89.796	91.192	90.886	90.843	91.369	88.978	88.182	90.09	92.565	90.161	92.749	103.494	91.941	94.071	95.686	93.684	93.571	93.655	94.408	94.249	93.369	95.706	98.069	104.9	92.641	94.576	93.975	93.994	93.512	95.253	98.212	95.927	93.514	96.004	99.624
47	2820	56.094	52.298	53.718	94.451	95.88	95.08	98.3	97.498	97.88	102.355	97.945	101.898	100.041	89.733	91.212	91.059	90.982	91.461	89.118	88.369	90.202	92.578	90.186	92.706	103.473	91.869	93.935	95.406	93.912	93.492	93.733	94.469	94.463	93.461	95.429	97.904	105.051	92.645	94.533	94.335	93.716	93.72	95.265	98.576	95.796	93.575	96.182	99.996
47.3333	2840	56.208	52.647	54.098	94.537	95.827	95.314	98.484	97.625	97.898	102.361	98.041	102.076	100.365	90.043	91.578	91.333	91.202	91.629	89.041	88.292	90.275	92.722	90.218	92.81	103.608	92.108	94.271	95.618	93.91	93.675	93.9	94.433	94.457	93.475	95.673	97.992	104.849	92.735	94.41	94.3	94.045	93.682	95.457	98.496	95.931	93.463	96.259	99.72
47.6667	2860	57.024	52.757	54.586	94.884	96.11	95.614	98.449	97.71	98.059	102.537	97.967	102.202	100.582	90.102	91.529	91.39	91.271	91.733	89.143	88.371	90.347	92.91	90.408	93.159	103.737	92.073	94.247	95.814	94.018	93.9	93.992	94.494	94.698	93.539	95.98	98.329	104.92	92.8	94.616	94.198	94.029	93.757	95.359	98.59	96.024	93.773	96.351	99.843
48	2880	57.245	52.947	54.739	94.941	96.463	95.606	98.492	97.578	98.127	102.567	97.996	102.247	100.769	90.52	92.076	91.673	91.324	91.61	89.373	88.643	90.614	93.143	90.551	93.316	103.908	92.027	94.341	95.12	94.092	94.086	94.278	94.939	94.565	93.643	95.825	98.239	105.073	92.827	94.78	94.504	94.196	93.761	95.629	98.682	96.159	93.631	96.314	100.024
48.3333	2900	57.516	53.439	55.188	95.141	96.533	95.584	98.631	97.602	97.898	102.584	98.018	102.043	100.933	90.404	92.037	91.763	91.537	92.043	89.667	88.765	90.653	93.19	90.733	93.38	103.922	92.218	94.365	94.792	94.359	93.939	94.227	94.816	94.773	93.737	96.027	98.32	104.91	92.908	94.884	94.382	94.149	93.792	95.569	98.894	96.233	93.924	96.325	99.788
48.6667	2920	57.808	53.596	54.965	95.102	96.835	96.016	98.827	97.741	98.047	102.596	98.108	102.022	101.088	90.529	92.422	91.988	91.704	92.282	89.627	88.82	91.031	93.429	91.033	93.637	104.125	92.312	94.692	94.737	94.418	94.333	94.449	95.014	94.857	93.837	95.973	98.461	105.212	93.008	94.763	94.553	94.318	93.961	95.563	98.71	96.092	93.906	96.396	100.037
49	2940	58.143	54.088	55.631	95.422	96.59	95.918	98.582	97.743	98.173	102.765	98.265	102.269	100.886	90.608	92.214	91.763	91.81	92.208	89.549	88.994	90.937	93.196	90.8	93.522	104.125	92.151	94.657	94.816	94.302	94.139	94.198	94.882	94.82	93.955	96.19	98.363	105.088	93.041	94.825	94.516	94.171	93.851	95.451	98.796	96.333	93.822	96.361	100.21
49.3333	2960	58.394	54.267	55.818	95.461	96.829	96.014	98.671	97.724	98.147	102.588	98.345	102.443	101.143	90.755	92.271	92.027	91.914	92.259	89.875	89.11	90.935	93.431	90.935	93.678	104.269	92.253	94.861	94.871	94.414	94.231	94.376	94.827	94.747	93.951	96.339	98.553	104.984	93.059	94.798	94.396	94.327	93.916	95.514	98.731	96.345	93.765	96.508	100.075
49.6667	2980	58.933	54.778	56.176	95.639	96.955	96.08	98.861	98.027	98.196	102.675	98.361	102.355	101.314	90.98	92.578	92.322	92.322	92.724	90.196	89.288	91.38	93.71	91.276	93.798	104.551	92.588	95.075	95.155	94.541	94.261	94.631	95.129	95.098	94.182	96.145	98.876	105.263	92.953	95.133	94.684	94.341	94.114	95.741	98.81	96.273	93.933	96.518	100.175
50	3000	58.892	54.886	56.353	95.39	96.804	96.137	98.743	97.757	97.951	102.618	98.155	102.357	101.124	90.863	92.455	92.173	92.104	92.447	89.916	89.194	91.422	93.584	91.186	93.794	104.318	92.541	94.831	94.98	94.392	94.149	94.618	94.869	94.994	93.959	96.306	98.616	105.369	92.894	94.875	94.598	94.316	93.867	95.525	98.737	96.294	93.906	96.443	100.135
50.3333	3020	59.322	55.09	56.633	95.59	97.037	96.229	98.771	97.937	98.32	102.731	98.249	102.502	101.376	91.094	92.675	92.282	92.184	92.725	90.125	89.502	91.308	93.667	91.325	93.961	104.527	92.62	95.163	95.153	94.516	94.425	94.598	95.29	95.371	94.198	96.39	98.796	105.324	93.178	94.9	94.706	94.447	94.002	95.731	98.931	96.394	93.965	96.669	100.322
50.6667	3040	59.508	55.325	56.792	95.786	97.01	96.22	98.765	97.857	98.376	102.563	98.278	102.3	101.416	90.902	92.747	92.257	92.316	92.714	90.41	89.349	91.394	94.098	91.182	93.931	104.543	92.445	94.741	95.063	94.825	94.635	94.747	95.331	95.32	94.19	96.506	98.876	105.09	93.008	94.731	94.604	94.453	93.924	95.796	98.865	96.216	93.731	96.408	100.055
51	3060	59.651	55.776	57.108	95.982	97.38	96.58	99.104	98.206	98.614	102.902	98.282	102.557	101.69	91.245	93.045	92.931	92.512	93.022	90.665	89.747	91.859	94.104	91.624	94.245	104.99	93.051	95.437	95.475	94.841	94.627	95.045	95.427	95.347	94.571	96.647	99.114	105.633	93.345	95.161	94.82	94.575	94.284	95.794	99.204	96.543	93.967	96.655	100.282
51.3333	3080	59.957	55.841	57.302	96.165	97.453	96.684	99.027	98.288	98.551	102.963	98.455	102.563	101.945	91.369	92.753	92.808	92.478	93.153	90.62	89.794	91.69	94.394	91.676	94.565	105.035	92.875	95.39	95.412	94.831	94.765	94.982	95.429	95.522	94.357	96.767	99.025	105.312	93.229	95.163	94.751	94.508	94.243	95.806	99.022	96.441	94.114	96.682	100.229
51.6667	3100	60.31	56.139	57.49	96.216	97.616	96.822	99.369	98.078	98.502	102.982	98.41	102.545	101.873	91.369	92.925	92.847	92.775	93.135	90.743	90.096	91.994	94.32	91.751	94.624	105.096	92.971	95.414	95.592	95.147	94.825	95.094	95.498	95.524	94.498	96.806	99.202	105.531	93.39	95.137	94.761	94.62	94.216	95.808	99.314	96.473	94.078	97.031	100.314
52	3120	60.673	56.214	57.81	96.216	97.608	96.896	99.129	98.204	98.657	102.898	98.355	102.441	101.81	91.355	93.006	92.788	92.771	93.516	90.776	89.782	91.976	94.3	91.802	94.52	105.165	92.957	95.492	95.543	94.965	94.798	95.041	95.676	95.575	94.61	97.08	99.388	105.533	93.247	95.176	94.853	94.704	94.22	95.884	99.088	96.637	94.096	96.835	100.351
52.3333	3140	60.935	56.28	57.925	96.257	97.592	96.749	99	98.082	98.604	103.08	98.504	102.594	102.127	91.325	93.1	92.971	92.698	93.376	90.902	90.11	91.796	94.361	91.808	94.71	105.031	92.984	95.304	95.633	95.373	94.99	95.473	95.712	95.582	94.555	96.843	99.094	105.508	93.404	95.078	94.9	94.543	94.202	95.82	99.084	96.576	94.041	96.798	100.278
52.6667	3160	61.175	56.763	58.141	96.398	97.684	96.976	99.108	98.206	98.59	102.955	98.625	102.665	102.196	91.665	93.243	93.031	93.035	93.594	91.135	90.265	92.175	94.518	92.261	94.839	105.398	92.975	95.567	95.935	95.296	95.112	95.212	95.729	95.729	94.871	97.012	99.422	105.853	93.433	95.298	94.906	94.667	94.133	95.98	99.327	96.657	94.224	96.835	100.453
53	3180	61.365	56.8	58.473	96.492	98.061	97.18	99.341	98.19	98.602	103.149	98.445	102.657	101.998	91.661	93.375	93.073	92.998	93.582	91.184	90.302	92.208	94.578	92.178	94.986	105.339	93.28	95.667	95.845	95.545	95.292	95.39	95.904	95.757	94.82	97.075	99.604	105.847	93.267	95.318	94.878	94.773	94.316	96.01	99.131	96.629	94.398	96.949	100.559
53.3333	3200	61.637	56.976	58.349	96.727	97.925	97.194	99.261	98.322	98.629	102.912	98.588	102.563	102.018	92.01	93.335	93.114	93.208	93.894	91.38	90.478	92.512	94.78	92.22	94.81	105.627	93.427	95.825	96.051	95.425	95.365	95.514	95.986	95.847	94.816	97.043	99.735	105.747	93.269	95.19	95.065	94.859	94.373	96.022	99.461	96.641	94.175	96.873	100.504
53.6708	3220.25	61.673	57.135	58.451	96.539	98.098	97.2	99.224	98.235	98.714	103.006	98.578	102.673	102.447	91.9	93.406	93.451	93.243	93.773	91.278	90.508	92.424	94.722	92.529	95.125	105.604	93.496	95.814	96.065	95.549	95.331	95.506	95.986	96.031	94.784	97.214	99.749	105.775	93.61	95.437	95.114	94.676	94.484	96.073	99.337	96.667	94.194	96.867	100.518
54	3240	61.986	57.465	59.12	96.733	97.941	97.284	99.349	98.357	98.62	102.969	98.443	102.655	102.167	91.822	93.298	93.388	93.263	93.594	91.335	90.361	92.382	94.796	92.247	95.018	105.496	93.537	95.859	95.902	95.616	95.439	95.52	96.108	96.041	94.951	97.32	99.647	105.602	93.371	95.204	94.853	94.529	94.263	95.992	99.151	96.743	94.153	96.918	100.478
54.3333	3260	62.131	57.476	58.902	96.708	98.041	97.165	99.218	98.347	98.798	102.784	98.433	102.547	102.359	91.978	93.255	93.394	92.967	93.984	91.29	90.484	92.257	94.837	92.38	95.122	105.443	93.31	95.933	95.965	95.551	95.367	95.624	96.057	95.871	94.916	97.225	99.743	105.649	93.259	94.98	94.806	94.784	94.265	96	99.084	96.543	94.227	96.9	100.506
54.6667	3280	62.612	57.865	59.48	96.978	98.457	97.618	99.555	98.706	98.873	102.967	98.753	102.806	102.808	92.102	94.008	93.778	93.439	94.249	91.508	90.657	92.849	95.21	92.747	95.49	105.931	93.763	96.402	96.494	95.875	95.618	95.788	96.22	96.39	95.31	97.418	99.973	106.092	93.686	95.463	95.137	94.984	94.537	96.318	99.531	96.792	94.355	97.165	100.661
55	3300	62.594	57.98	59.447	96.898	98.286	97.443	99.29	98.367	98.561	103.071	98.447	102.714	102.306	91.978	93.578	93.233	93.316	93.796	91.447	90.639	92.302	94.896	92.363	95.169	105.455	93.727	96.112	96.11	95.594	95.482	95.594	96.147	96.049	95.047	97.241	99.906	105.975	93.59	95.431	94.945	94.835	94.367	96.002	99.206	96.578	94.314	96.865	100.639
55.3333	3320	63.016	58.363	59.831	96.939	98.543	97.625	99.592	98.557	98.869	103.194	98.576	102.912	102.478	92.329	93.763	93.763	93.6	94.273	91.49	90.724	92.6	95.159	92.827	95.575	105.957	94.096	96.335	96.441	95.822	95.645	95.72	96.208	96.157	95.382	97.504	100	106.035	93.547	95.369	95.061	94.725	94.518	96.32	99.518	96.886	94.427	96.851	100.788
55.6667	3340	63.004	58.347	59.837	97.182	98.643	97.655	99.602	98.471	98.804	103.237	98.759	102.645	102.743	92.149	93.845	93.478	93.908	94.102	91.767	90.829	92.91	95.302	92.894	95.512	105.894	93.988	96.418	96.635	95.939	95.767	95.896	96.384	96.308	95.729	97.561	99.986	105.984	93.675	95.429	95.306	94.949	94.502	96.375	99.394	96.849	94.396	97.29	100.859
56.0042	3360.25	63.257	58.543	60.175	97.002	98.575	97.541	99.463	98.576	99.1	103.151	98.631	102.81	102.7	92.402	94.018	93.847	93.775	94.304	91.882	90.988	93.1	95.286	92.947	95.602	105.861	94.125	96.351	96.524	95.863	95.557	96.11	96.624	96.508	95.508	97.622	100.241	105.931	93.7	95.473	95.239	94.971	94.78	96.284	99.582	96.808	94.416	97.051	100.892
56.3333	3380	63.318	58.616	60.273	97.184	98.643	97.763	99.667	98.541	99.022	103.155	98.661	102.827	102.725	92.302	93.849	93.718	93.663	94.306	91.939	91.08	92.906	95.347	92.896	95.731	105.894	93.937	96.212	96.657	95.975	95.702	95.861	96.559	96.355	95.545	97.706	100.173	105.875	93.778	95.222	95.227	94.806	94.524	96.222	99.571	96.884	94.39	97.088	100.812
56.6708	3400.25	63.522	58.812	60.516	97.4	98.729	97.767	99.525	98.604	98.904	103.202	98.782	102.824	102.953	92.278	93.961	93.735	93.833	94.453	91.763	91.069	93.155	95.525	93.045	96.049	105.9	94.024	96.298	96.688	96.016	96.043	96.069	96.478	96.412	95.471	97.586	100.357	106.114	93.604	95.439	95.337	94.982	94.592	96.275	99.465	97.022	94.537	97.149	100.945
57.0042	3420.25	63.81	59.106	60.622	97.506	98.953	97.871	99.704	98.627	98.906	103.329	98.761	102.918	103.247	92.671	94.302	93.951	94.039	94.471	91.843	91.282	93.373	95.676	93.259	95.904	106.049	94	96.275	96.855	96.347	95.955	96.198	96.747	96.514	95.81	97.749	100.353	106.269	93.837	95.692	95.441	95.239	94.708	96.402	99.818	97.173	94.637	97.292	101.033
57.3333	3440	63.882	59.214	60.476	97.567	98.796	97.965	99.6	98.635	98.963	103.324	98.818	102.792	103.084	92.347	94.086	93.918	93.888	94.386	91.967	91.327	93.016	95.553	92.986	95.869	105.849	94.025	96.38	96.894	96.102	96.271	96.043	96.631	96.465	95.753	97.884	100.218	105.812	93.675	95.586	95.188	94.739	94.531	96.357	99.514	96.939	94.424	97.182	100.598
57.6667	3460	63.92	59.329	60.614	97.569	98.829	98.086	99.578	98.641	99.051	103.147	98.898	102.765	103.137	92.622	94.194	94.022	93.976	94.41	92.186	91.214	93.249	95.694	93.227	95.996	105.816	93.904	96.284	96.949	96.531	96.008	96.214	96.735	96.675	95.757	97.849	100.457	105.996	93.861	95.704	95.392	95.159	94.778	96.316	99.461	97.175	94.647	97.059	101.178
58.0042	3480.25	64.498	59.265	61.151	97.682	99.102	98.19	99.62	98.884	99.159	103.406	98.894	102.857	103.371	92.524	94.308	94.355	94.184	94.624	92.402	91.459	93.337	95.994	93.473	96.029	105.876	94.133	96.376	97.149	96.437	96.351	96.543	97.141	96.82	95.959	97.953	100.627	106.124	93.763	95.743	95.422	95.016	94.835	96.449	99.773	97.065	94.782	97.329	101.12
58.3333	3500	64.447	59.447	60.986	97.51	99.09	97.951	99.463	98.696	98.951	103.316	98.81	102.888	103.139	92.502	94.096	94.371	94.147	94.729	92.112	91.388	93.437	95.847	93.257	96.057	105.539	93.961	96.365	96.847	96.38	96.049	96.412	96.735	96.767	95.794	97.857	100.739	105.984	93.722	95.543	95.58	95.182	94.655	96.422	99.776	97.143	94.604	97.335	100.924
58.6708	3520.25	64.629	59.68	61.425	97.704	99.116	98.355	99.731	98.945	99.129	103.486	98.951	103.073	103.378	92.89	94.467	94.473	94.304	94.741	92.322	91.476	93.524	95.947	93.412	96.367	105.869	94.149	96.39	96.922	96.363	96.22	96.643	97.124	97.057	96.039	98.359	100.825	106.19	93.945	95.794	95.398	95.18	94.825	96.508	99.837	97.273	94.739	97.441	101.069
59	3540	64.645	59.602	61.345	97.588	98.957	98.155	99.8	98.604	99.08	103.322	98.916	102.955	103.375	92.653	94.273	94.367	94.269	94.861	92.286	91.506	93.418	96	93.437	96.286	105.669	93.902	96.359	96.831	96.402	96.116	96.408	97.039	97.045	95.863	98.198	100.755	106.196	93.786	95.673	95.353	95.318	94.829	96.704	99.694	96.931	94.651	97.41	101.02
59.3333	3560	64.931	60.09	61.508	97.729	99.245	98.365	99.873	98.924	99.373	103.412	98.853	102.988	103.531	92.822	94.402	94.467	94.451	94.965	92.506	91.645	93.576	96.143	93.637	96.449	106.067	94.092	96.351	97.076	96.502	96.208	96.804	97.343	97.055	96.253	98.153	100.849	106.173	93.967	95.702	95.471	95.398	94.873	96.551	99.749	97.147	94.839	97.478	101.106
59.6667	3580	65.088	60.247	61.645	97.986	99.255	98.504	99.727	98.753	99.402	103.451	99.051	103.233	103.761	92.925	94.508	94.81	94.571	95.065	92.584	91.816	93.688	96.1	93.859	96.773	105.875	94.035	96.596	96.988	96.573	96.337	96.814	97.259	97.241	96.402	98.314	101.065	106.208	94.006	95.851	95.616	95.235	95.043	96.841	99.782	97.202	94.78	97.384	101.069
60.0042	3600.25	65.243	60.208	61.822	97.865	99.416	98.561	99.759	98.941	99.173	103.427	99.008	103.084	103.737	93.067	94.7	94.692	94.608	95.108	92.641	91.743	93.673	96.212	93.878	96.304	105.81	94.18	96.441	96.975	96.655	96.312	96.675	97.545	97.239	96.365	98.465	100.918	106.412	93.943	95.755	95.592	95.28	95.076	96.575	99.712	97.22	94.898	97.424	101.327
60.3375	3620.25	65.514	60.402	61.963	98.067	99.359	98.365	99.708	98.849	99.202	103.4	98.898	102.992	103.704	93.082	94.514	94.484	94.408	95.227	92.718	91.637	93.514	96.129	93.651	96.443	105.747	94.022	96.48	97.08	96.412	96.269	96.673	97.202	97.067	96.275	98.288	101.069	106.335	93.988	95.82	95.541	95.229	94.908	96.608	99.72	97.367	94.88	97.629	101.051
60.6708	3640.25	65.345	60.494	62.039	98.149	99.545	98.663	100.063	98.812	99.337	103.459	99.069	103.022	103.945	93.271	94.92	94.89	94.831	95.339	92.751	91.896	93.99	96.445	93.88	96.898	106.047	94.059	96.551	97.129	96.659	96.325	96.763	97.282	97.216	96.414	98.467	100.969	106.541	94.106	95.945	95.675	95.547	94.91	96.598	100.018	97.296	94.853	97.612	101.363
61.0042	3660.25	65.816	60.773	62.314	98.261	99.645	98.575	99.908	99.173	99.467	103.557	98.92	103.11	104.147	93.267	94.935	94.8	94.684	95.225	92.888	91.924	93.98	96.351	93.955	96.818	106	94.19	96.657	97.204	96.518	96.286	96.976	97.467	97.363	96.533	98.559	100.833	106.406	94.135	95.869	95.606	95.484	94.912	96.771	100.118	97.382	94.835	97.586	101.19
61.3375	3680.25	65.671	60.653	62.363	98.008	99.441	98.596	99.735	98.904	99.333	103.424	99.059	103.002	103.798	93.129	94.688	94.576	94.592	95.237	92.865	92.161	94.027	96.357	93.716	96.675	105.639	94.082	96.32	96.861	96.633	96.306	96.851	97.516	97.137	96.337	98.286	101.092	106.229	93.937	95.733	95.567	95.341	94.925	96.802	99.89	97.404	94.861	97.469	101.151
61.6667	3700	66.033	61.147	62.531	98.394	99.578	98.757	99.996	99.033	99.422	103.641	99.063	102.945	104.161	93.32	94.916	94.982	94.959	95.327	92.833	91.959	94.133	96.443	94.073	96.986	105.924	94.065	96.48	97.147	96.549	96.341	96.853	97.406	97.253	96.327	98.616	101.182	106.553	94.094	96.198	95.6	95.416	95.118	96.788	100.055	97.398	94.855	97.484	101.163
62	3720	65.906	61.082	62.49	98.349	99.678	98.769	99.984	98.912	99.404	103.51	99.104	102.878	103.92	93.204	94.976	95.018	94.784	95.359	92.951	92.069	93.951	96.306	94.004	96.798	105.959	93.796	96.324	97.139	96.539	96.151	96.724	97.133	96.943	96.408	98.443	101.224	106.459	94.12	95.933	95.718	95.455	95.167	96.612	99.865	97.476	94.957	97.588	101.32
62.3333	3740	66.104	61.269	62.788	98.443	99.757	98.99	100.01	99.32	99.441	103.51	99.149	102.941	104.235	93.671	95.114	95.063	95.163	95.571	93.186	92.225	94.424	96.578	94.375	97.086	105.967	94.186	96.557	97.047	96.684	96.365	96.782	97.41	97.194	96.449	98.767	101.155	106.435	94.29	96.098	95.714	95.516	95.141	96.814	100.073	97.51	94.869	97.743	101.208
62.6708	3760.25	66.545	61.318	62.839	98.543	99.555	98.871	99.902	99.078	99.506	103.724	99.055	102.927	104.296	93.59	95.102	95.124	94.967	95.716	93.208	92.124	94.143	96.665	94.396	97.161	105.969	93.859	96.514	97.061	96.396	96.241	96.847	97.425	97.357	96.486	98.704	101.292	106.433	94.143	96.235	95.963	95.606	95.137	96.759	100.11	97.433	95.002	97.904	101.586
63.0042	3780.25	66.641	61.453	63.114	98.506	99.784	99.139	100.2	99.196	99.616	103.592	99.161	103.208	104.331	93.79	95.21	95.204	95.206	95.759	93.11	92.414	94.265	96.782	94.443	97.173	105.871	94.1	96.355	96.957	96.327	96.151	96.727	97.324	97.231	96.331	98.72	101.245	106.749	94.102	96.125	95.812	95.502	95.104	96.778	100.094	97.571	95.084	97.655	101.555
63.3375	3800.25	66.567	61.488	62.975	98.618	99.712	98.99	99.869	98.967	99.467	103.563	99.045	103.106	104.302	93.496	95.131	95.11	94.969	95.337	93.053	92.302	94.206	96.684	94.318	97.2	105.686	93.888	96.378	96.937	96.504	96.125	96.71	97.347	97.061	96.476	98.425	101.129	106.433	94.09	95.696	95.641	95.514	95.031	96.843	100.09	97.314	95.165	97.618	101.235
63.6708	3820.25	66.863	61.873	63.218	98.682	100.063	99.073	99.963	99.186	99.545	103.755	99.09	103.269	104.371	93.643	95.171	95.333	95.12	95.716	93.198	92.271	94.3	96.818	94.571	97.284	105.835	94.035	96.386	96.884	96.561	96.443	96.731	97.42	97.09	96.588	98.818	101.22	106.453	94.306	96.145	95.753	95.588	95.398	96.796	100.092	97.527	95.31	97.782	101.622
64.0042	3840.25	67.135	61.914	63.371	98.794	100.12	99.059	100.212	99.233	99.463	103.806	98.927	103.286	104.606	93.771	95.198	95.418	95.333	95.792	93.29	92.622	94.439	97.018	94.331	97.341	105.829	94.118	96.388	97	96.639	96.3	96.788	97.439	97.269	96.418	98.671	101.127	106.406	94.245	96.269	95.798	95.629	95.192	96.906	99.957	97.459	95.351	97.859	101.455
64.3375	3860.25	67.263	61.929	63.618	98.788	100.302	98.924	100.19	99.325	99.457	103.586	99.194	103.129	104.284	93.637	95.155	95.329	95.124	95.743	93.292	92.343	94.422	96.951	94.341	97.451	105.567	94.059	96.157	97.059	96.314	96.298	96.835	97.253	96.971	96.453	98.451	100.924	106.553	94.253	96.078	95.829	95.547	95.476	96.937	100.175	97.567	95.143	97.9	101.304
[truncated: 48 more columns]

## Sheet: MTP4_raw
Time (h)	Time (min)	A1	A2	A3	A4	A5	A6	A7	A8	A9	A10	A11	A12	B1	B2	B3	B4	B5	B6	B7	B8	B9	B10	B11	B12	C1	C2	C3	C4	C5	C6	C7	C8	C9	C10	C11	C12	D1	D2	D3	D4	D5	D6	D7	D8	D9	D10	D11	D12
0	0	7.667	6.463	6.773	6.945	7.506	8.143	7.163	6.867	6.388	6.284	6.004	6.778	6.843	6.561	7.094	7.112	7.1	7.284	7.341	6.814	7.508	6.225	5.663	6.6	6.227	5.765	6.888	6.531	6.31	6.308	6.096	6.547	7.157	5.808	5.19	5.524	6.21	5.282	6.757	5.724	5.641	6.006	5.886	7.065	5.541	5.324	5.1	5.355
0.333333	20	7.747	6.682	7.343	7.5	7.988	7.825	7.547	7.382	6.79	6.343	6.084	7.11	6.965	6.61	7.041	6.99	7.163	7.369	7.253	6.459	7.21	6.969	6.022	6.831	6.604	6.076	7.424	6.561	6.42	6.273	6.184	6.535	6.925	5.955	5.38	5.647	6.29	5.543	6.973	5.802	5.806	6.1	6.088	7.043	6.033	5.349	5.178	5.435
0.666667	40	7.827	6.537	6.673	6.961	7.335	7.52	6.967	6.684	6.42	6.006	5.827	6.7	7.108	6.733	7.29	6.914	7.094	7.378	7.137	6.406	7.247	6.59	5.865	6.59	7.09	6.533	7.994	6.522	6.612	6.49	6.218	6.604	6.9	6.02	5.288	5.475	6.545	5.865	7.265	5.853	5.975	6.173	6.12	7.169	5.945	5.384	5.222	5.392
1	60	7.939	6.878	6.839	7.649	7.749	7.627	7.127	7.092	6.959	6.596	6.263	7.143	7.184	6.775	7.449	7.043	7.108	7.524	7.159	6.49	7.402	6.851	6.225	7.102	7.455	6.857	8.363	6.655	6.869	6.837	6.363	6.629	7.088	6.3	5.624	5.808	6.725	6.102	7.52	6.022	6.041	6.32	6.345	7.376	6.318	5.563	5.369	5.665
1.33333	80	7.996	6.767	6.841	6.99	7.076	7.451	6.81	6.657	6.486	6.306	6.067	6.949	7.502	6.951	7.598	7.01	7.371	7.81	7.194	6.529	7.229	6.767	5.935	6.912	8.124	7.329	9.169	6.963	7.263	7.343	6.547	6.751	7.086	6.196	5.52	5.812	7.045	6.437	7.837	6.053	6.257	6.586	6.304	7.4	6.304	5.602	5.439	5.559
1.66667	100	8.218	6.78	6.927	6.957	7.157	7.561	6.925	6.641	6.475	6.31	6.049	6.933	7.792	7.116	7.843	7.122	7.635	7.945	7.349	6.671	7.424	6.794	6.045	6.941	8.427	7.702	9.963	7.188	7.69	7.796	6.788	6.886	7.292	6.229	5.52	5.745	7.404	6.806	8.139	6.339	6.561	6.98	6.596	7.659	6.576	5.753	5.596	5.769
2	120	8.639	7.112	7.229	7.545	7.529	7.678	7.188	7.016	6.982	7	6.839	7.773	7.896	7.402	8.09	7.329	7.88	8.363	7.633	6.978	7.557	7.259	6.547	7.396	8.971	8.578	10.557	7.729	8.041	8.316	7.114	7.3	7.343	6.639	5.902	6.48	7.902	7.18	8.773	6.637	6.971	7.488	6.831	7.867	6.835	6.194	5.935	6.227
2.33333	140	8.288	7.196	7.09	7.169	7.347	7.763	7.159	6.906	6.871	6.671	6.3	7.253	8.163	7.6	8.28	7.59	8.249	8.651	8.078	7.251	7.943	7.275	6.475	7.378	10.208	9.504	11.4	8.284	8.688	9.078	7.757	7.741	7.665	6.604	5.896	6.333	8.437	7.971	9.475	7.027	7.561	8.386	7.31	8.227	7.029	6.282	6.004	6.308
2.66667	160	9.629	7.839	7.347	7.251	7.445	8.016	7.273	7.057	6.845	6.792	6.555	7.451	8.429	7.9	8.575	7.98	8.694	9.163	8.727	7.761	8.31	7.678	6.947	7.659	11.735	10.414	12.137	8.643	9.373	9.829	8.308	8.369	7.99	6.922	6.096	6.406	9.359	8.943	10.335	7.6	7.953	9.218	8.045	8.553	7.292	6.606	6.41	6.524
3	180	10.68	8.243	7.678	7.388	7.663	8.365	7.382	7.194	7.098	7.231	6.933	7.894	8.769	8.278	8.861	8.355	9.204	9.692	9.329	8.533	8.704	7.888	7.202	8.029	12.492	10.975	12.202	9.247	9.892	10.092	8.935	9.118	8.584	7.069	6.276	6.767	10.669	9.996	11.206	8.39	8.982	10.127	8.939	9.165	7.792	7.088	6.767	7.114
3.33333	200	10.904	8.292	8.694	7.694	7.888	8.429	7.575	7.475	7.278	7.402	7.084	8.286	8.953	8.643	9.269	8.814	9.494	10.353	10.047	9.239	9.416	8.163	7.606	8.737	13.19	11.427	12.48	9.925	10.38	10.504	9.725	9.727	9.09	7.425	6.441	7.078	12.225	10.888	12.21	9.247	9.853	11.024	9.98	10.018	8.245	7.643	7.175	7.414
3.66667	220	11.11	8.512	10.218	7.559	7.692	8.678	7.427	7.296	7.092	7.045	6.612	7.527	9.259	8.988	10.118	9.247	10.314	11.427	11.082	10.243	10.522	8.757	7.582	8.61	13.429	11.673	12.678	10.988	10.957	11.206	10.673	10.743	10.069	7.512	6.518	6.99	13.908	11.839	13.278	10.722	11.159	12	11.561	11.12	8.678	7.745	7.425	7.533
4	240	11.125	9.282	10.371	7.38	7.676	8.841	7.4	7.127	6.976	7.049	6.525	7.318	9.667	9.6	11.308	9.757	10.978	12.033	11.894	10.841	11.653	9.373	8.02	8.576	13.745	11.818	12.943	11.59	11.473	11.616	11.182	11.147	10.818	7.722	6.688	7.051	14.986	12.737	14.22	12.067	12.053	12.757	12.588	12.688	9.449	8.147	7.79	8.047
4.33333	260	10.788	9.539	10.169	7.578	7.755	9.008	7.522	7.233	7.169	7.251	6.776	7.58	10.263	10.308	11.902	10.443	11.42	12.537	12.373	11.4	12.206	10.565	8.757	9.161	13.988	11.933	13.137	11.898	11.688	11.722	11.553	11.447	11.433	8.373	7.059	7.412	15.902	13.19	14.62	13.294	12.92	13.2	13.584	14.335	10.827	8.841	8.412	8.68
4.66667	280	10.963	9.729	10.371	7.875	7.984	9.329	7.724	7.386	7.388	7.514	7.039	7.794	11.133	11.435	12.818	11.867	12.602	13.145	13.061	12.239	13.124	12.069	10.086	10.263	14.992	12.782	13.822	12.708	12.255	12.178	12.141	12.018	12.182	9.125	7.245	7.645	17.004	13.825	15.304	14.447	14.08	13.967	14.61	15.739	12.727	9.586	9.141	9.694
5	300	11.053	9.8	10.42	7.967	8.122	9.369	7.876	7.39	7.386	7.816	7.396	8.176	11.9	11.861	13.373	12.949	13.135	13.635	13.504	12.931	13.845	13.512	11.547	11.429	15.539	13.149	14.237	13.037	12.58	12.533	12.551	12.343	12.847	9.933	7.614	8	17.58	14.543	16.025	15.222	14.767	14.753	15.378	16.606	14.798	10.498	9.984	10.837
5.33333	320	10.79	9.659	10.216	7.896	8.296	9.608	8.175	7.649	7.163	7.625	7.071	7.878	12.786	12.237	13.524	14.061	13.571	13.827	13.912	13.216	14.324	14.835	13.208	13.651	15.488	13.153	14.367	13.214	12.747	12.773	12.739	12.667	13.392	11.2	8.159	8.533	18.037	15.059	16.698	15.725	15.575	15.516	16.375	17.461	16.541	11.494	10.888	11.039
5.66667	340	10.945	9.792	10.431	8.143	8.567	9.857	8.357	7.724	7.4	7.563	6.984	7.576	13.678	13.047	14.106	14.92	14.188	14.394	14.624	13.89	14.967	15.559	14.335	15.312	16.606	13.902	15.178	13.982	13.531	13.504	13.394	13.241	13.869	12.533	8.949	9.302	19.176	16.076	17.747	16.678	16.449	16.555	17.408	18.467	17.814	13.906	12.867	12.371
6	360	10.796	9.663	10.269	8.016	8.724	9.957	8.582	7.839	7.402	7.382	6.957	7.673	14.337	13.176	14.02	14.945	14.376	14.586	15.053	14.375	15.459	15.973	14.718	16.408	16.775	14.041	15.347	14.196	13.612	13.663	13.749	13.559	14.151	13.863	10.408	10.604	20.239	17.098	18.592	17.651	17.498	17.529	18.518	19.502	18.747	17.576	16.665	14.839
6.33333	380	10.998	9.855	10.427	8.212	8.849	10.271	8.737	8.02	7.741	8.106	7.557	8.371	15.118	13.914	14.782	16.116	15.508	15.516	16.259	15.512	16.473	17.182	15.724	17.643	17.939	14.965	16.18	15.096	14.688	14.718	14.643	14.378	15.035	14.755	12.249	12.798	21.849	18.457	20.027	19.061	18.882	19.047	19.973	20.833	20.176	19.731	20.178	20.859
6.66667	400	11.076	9.882	10.467	8.231	9.045	10.49	8.767	8.239	7.861	8.104	7.494	8.178	15.353	14.229	15.165	16.775	16.178	16.331	17.275	16.416	17.298	18.094	16.649	18.729	18.378	15.553	16.857	15.888	15.512	15.453	15.398	15.086	15.625	15.404	13.735	14.637	23.461	19.802	21.324	20.431	20.257	20.369	21.269	22.045	21.292	21.396	21.822	23.508
7	420	11.006	9.747	10.375	8.484	9.353	10.551	9.041	8.327	8.075	8.161	7.616	8.418	15.871	14.682	15.49	17.406	16.824	17.039	18.482	17.457	18.294	19.239	17.51	19.747	19.29	16.233	17.618	16.516	16.137	16.367	15.965	15.98	16.275	16.067	14.463	15.759	25.367	21.271	22.747	21.965	21.79	21.888	22.771	23.871	22.802	22.906	22.788	24.888
7.33333	440	10.998	9.886	10.459	8.69	9.392	10.794	9.08	8.39	8.143	8.031	7.375	8.192	16.09	15.096	15.69	18.088	17.586	17.908	19.42	18.461	19.422	20.076	18.661	21	20.439	17.1	18.376	17.486	16.994	17.075	16.98	16.882	16.937	16.624	14.873	16.216	27.422	22.918	24.437	23.69	23.486	23.639	24.667	25.529	24.378	24.329	24.239	25.878
7.66667	460	11.063	9.767	10.406	8.896	9.571	11.141	9.265	8.727	8.133	7.988	7.414	8.2	16.859	15.696	16.355	19.331	18.855	19.21	20.792	19.965	21.12	21.88	20.367	22.529	21.296	17.951	19.176	18.367	17.875	18.19	18.08	17.894	18.147	17.598	15.645	17.061	29.531	24.757	26.071	25.543	25.378	25.329	26.555	27.206	26.139	26.012	25.922	27.659
8	480	11.01	9.825	10.431	8.939	9.784	11.259	9.427	8.737	8.357	7.924	7.28	8.159	17.496	16.018	16.751	20.604	19.957	20.422	22.137	21.124	22.48	23.294	21.753	24.075	22.6	18.678	20.133	19.284	19.024	19.057	19.151	18.835	19.169	18.696	16.455	17.89	31.835	26.798	28.12	27.694	27.365	27.555	28.616	29.433	28.135	28.151	27.616	29.676
8.33333	500	11.118	9.831	10.486	9.159	9.973	11.378	9.567	8.986	8.539	8.475	7.929	8.675	18.253	16.869	17.553	21.651	21.208	21.655	23.761	22.531	23.79	24.633	23.167	25.514	23.433	19.72	21.022	20.349	19.971	20.278	20.167	19.784	20.194	19.945	17.441	18.949	34.371	29.127	30.514	30.133	29.773	29.971	30.947	31.892	30.369	30.298	29.963	31.949
8.66667	520	10.998	9.757	10.292	9.606	10.08	11.343	9.735	9.167	8.696	8.333	7.702	8.427	18.659	17.112	18.11	22.937	22.406	22.696	24.892	24.029	25.057	25.876	24.406	26.678	24.42	20.561	21.778	21.402	20.875	21.178	21.161	20.767	21.194	20.671	18.28	20.031	36.788	31.337	32.571	32.4	32.396	32.637	33.592	34.457	33.012	32.731	32.265	34.484
9	540	10.988	9.739	10.378	9.9	10.459	11.343	9.849	9.375	8.882	8.363	7.78	8.616	19.822	18.094	18.975	24.131	23.722	24.114	26.224	25.553	26.38	27.441	25.831	28.484	25.49	21.369	22.651	22.478	22.141	22.184	22.269	21.894	22.078	21.684	19.369	21.286	39.727	33.853	35.245	34.841	34.79	34.824	35.941	36.816	35.361	35.19	34.873	37.073
9.33333	560	11.033	9.718	10.373	10.122	10.669	11.259	9.957	9.535	8.973	8.059	7.529	8.39	20.539	18.722	19.665	25.486	25.057	25.647	28.153	27.163	28.149	29.494	28.129	30.659	27.012	22.733	24.059	23.818	23.633	23.627	23.635	23.19	23.431	23.075	20.576	22.824	43.104	36.81	38.08	38.124	37.812	37.951	39.031	39.822	38.2	37.786	37.392	39.873
9.66667	580	11.047	9.804	10.398	10.376	10.873	11.371	10.157	9.853	9.235	8.243	7.718	8.635	21.2	19.978	20.759	26.875	26.384	26.967	29.563	28.551	29.755	30.822	29.463	32.037	28.049	24.031	25.253	25.198	24.724	24.627	24.892	24.425	24.753	24.243	21.971	24.02	46.72	39.929	41.198	41.21	40.988	40.869	42.204	43.039	40.92	40.731	40.206	42.598
10	600	11.09	9.863	10.594	10.573	10.982	11.455	10.508	10.035	9.516	8.52	8.01	8.937	22.902	21.198	22.01	28.106	27.72	28.227	30.755	30.096	31.041	32.32	30.959	33.563	28.92	24.973	26.002	26.175	25.706	25.825	25.914	25.506	25.876	25.231	23.229	25.596	51.12	43.535	44.71	44.808	44.514	44.559	45.782	46.604	44.353	43.939	43.539	46.29
10.3333	620	11.12	9.961	10.618	10.641	11.035	11.525	10.637	10.308	9.639	8.751	8.192	9.118	24.133	22.053	22.818	29.275	29.155	29.594	31.62	31.18	32.163	33.596	32.139	34.978	30.231	25.422	26.631	27.153	26.975	26.918	27.263	26.818	27.002	26.702	24.404	26.778	54.943	47.163	48.296	48.492	48.061	48.063	49.294	49.975	47.729	47.271	47.078	49.759
10.6667	640	11.106	9.908	10.559	10.629	11.116	11.482	10.669	10.418	9.784	8.429	7.865	8.882	24.725	23.037	23.763	30.814	30.612	31.037	32.953	32.427	33.253	30.871	33.361	32.141	31.478	26.775	28.171	28.829	28.235	28.412	28.398	28.025	28.431	28.208	25.88	28.41	58.684	50.786	51.786	52.229	51.835	51.522	52.845	53.902	51.69	50.953	50.945	53.392
11	660	11.006	9.986	10.604	10.767	11.159	11.508	10.767	10.61	10.031	8.763	8.333	9.306	25.79	23.682	24.571	31.984	31.902	32.429	30.414	30.09	34.557	32.439	31.11	33.596	32.433	27.916	28.863	29.645	29.608	29.48	29.625	29.12	29.514	29.096	27.065	29.582	63.355	54.704	55.833	56.38	55.837	55.6	57.375	58.408	55.696	55.037	54.749	57.429
11.3333	680	11.151	9.933	10.569	10.714	11.122	11.541	10.704	10.637	10.127	8.929	8.482	9.312	26.9	24.804	25.592	33.114	32.655	32.72	32.159	31.402	32.6	34.345	32.822	35.478	33.694	28.808	29.943	30.565	29.869	29.875	30.18	30.178	30.624	30.484	28.247	31.173	68.59	59.339	60.243	60.853	60.527	60.22	61.763	62.886	60.039	59.32	59.265	61.91
11.6667	700	11.141	9.882	10.647	10.782	11.137	11.588	10.884	10.731	10.322	8.808	8.339	9.214	28.049	25.837	26.665	34.371	33.996	34.104	33.835	33.169	34.251	36.304	34.849	37.678	35.222	30.184	31.129	31.694	31.149	31.037	31.224	31.376	31.831	31.669	29.578	32.276	74.733	64.435	65.182	66.145	65.398	65.127	66.814	67.706	64.561	63.873	63.747	66.657
12	720	11.118	10.063	10.618	10.751	11.267	11.575	10.906	10.88	10.606	8.79	8.278	9.275	29.039	26.91	27.563	31.32	31.471	32.178	35.984	35.545	36.451	38.827	37.09	39.949	36.018	30.976	32.069	29.267	31.943	30.465	29.573	28.782	32.839	28.978	30.855	33.682	81.114	70.022	70.953	72.045	71.253	70.869	72.541	73.7	70.618	69.476	69.341	72.376
12.3333	740	11.127	9.969	10.555	10.686	11.186	11.52	10.798	10.775	10.549	8.943	8.337	9.39	30.204	27.704	28.265	33.333	33.027	33.237	38.351	37.745	38.7	41.153	39.42	42.265	36.541	30.408	31.42	31.125	32.067	31.063	31.255	30.118	30.449	30.135	32.231	34.539	85.896	74.773	75.41	76.355	76.147	75.708	77.49	78.873	75.753	74.576	74.857	77.859
12.6667	760	11.198	9.786	10.531	10.712	11.059	11.459	10.88	10.782	10.549	8.894	8.271	9.318	31.522	28.851	29.557	35.265	34.969	35.506	40.661	40.033	40.825	43.482	41.704	44.743	38.727	32.665	33.484	33.527	34.48	33.767	33.759	32.463	32.406	31.861	29.267	32.612	90.688	79.016	79.669	80.708	80.194	79.9	81.657	83.469	80.322	79.075	79.531	82.553
13	780	11.527	10.376	10.833	11.071	11.571	11.822	11.192	11.133	10.982	8.973	8.437	9.473	33.061	30.327	30.969	37.092	36.757	37.247	42.684	42.269	43.18	45.859	43.853	46.843	40.986	34.494	35.531	35.586	36.706	35.9	35.802	34.276	34.345	33.659	30.798	34.161	93.976	82.31	83.022	83.873	83.737	83.227	84.949	86.963	83.996	82.855	83.241	86.502
13.3333	800	11.086	10	10.635	10.824	11.296	11.665	11.075	10.929	10.757	9.239	8.58	9.869	33.675	31.069	31.716	39.349	39.286	39.588	45.016	44.527	45.276	48.378	46.324	49.355	43.182	36.733	37.551	37.825	38.888	38.116	37.986	36.606	36.686	35.873	32.667	36.225	96.159	84.52	85.376	86.308	86.422	85.894	87.557	89.98	87.227	86.147	86.476	89.959
13.6667	820	11.257	10.065	10.616	10.865	11.288	11.659	11.098	11.022	10.751	9.692	8.888	10.42	34.616	32.022	32.735	41.322	41.022	41.518	47.476	46.996	47.669	50.784	48.625	51.718	45.082	38.735	39.476	39.782	40.912	40.296	40.096	38.796	38.788	37.794	34.708	38.355	97.9	86.335	86.855	88.106	88.384	87.475	89.345	91.973	89.267	88.325	88.898	92.557
14	840	11.114	9.806	10.541	10.816	11.2	11.527	10.929	10.853	10.804	9.463	8.463	10.141	36.182	33.025	33.51	43.192	43.059	43.68	49.939	49.524	49.973	53.359	51.122	54.408	46.886	40.525	41.259	42.012	42.904	42.424	42.188	41.178	40.978	40.112	36.686	40.392	99.302	87.608	88.18	89.235	89.292	88.992	90.69	93.643	90.908	89.937	90.545	94.129
14.3333	860	11.206	9.869	10.575	10.825	11.245	11.541	10.994	10.922	10.82	9.676	8.676	10.514	35.308	33.869	34.269	45.204	45.251	45.686	52.4	51.876	52.384	56.045	53.675	57.008	48.867	42.047	43.261	44.125	45.106	44.52	44.386	43.437	43.202	42.122	38.986	42.631	100.292	88.704	89.284	90.431	90.825	90.184	92.149	94.843	92.373	91.139	91.898	95.847
14.6667	880	11.247	10.127	10.69	10.937	11.302	11.669	11.229	11.051	10.865	10.114	9.11	11.09	33.945	34.767	35.094	47.373	47.304	47.684	54.514	54.157	54.839	58.482	56.057	59.404	51.155	44.433	45.131	46.243	47.292	46.686	46.91	45.559	45.402	44.159	41.055	44.861	101.604	89.553	90.302	91.161	91.767	91.239	92.969	95.98	93.647	92.302	92.829	96.727
15	900	11.247	9.92	10.496	10.831	11.229	11.578	11.073	11.031	10.869	10.249	9.167	11.253	34.08	35.098	35.798	49.437	49.202	49.796	57.063	56.947	57.241	61.098	58.576	62.271	53.386	46.278	47.102	48.457	49.439	48.596	49.288	47.92	47.743	46.688	43.514	47.196	102.375	90.602	91.222	92.127	92.58	91.861	93.829	97.039	94.531	93.129	93.7	97.714
15.3333	920	11.18	9.963	10.524	10.751	11.188	11.586	11.075	10.927	10.839	10.822	9.353	11.716	35.79	36.631	37.576	51.825	51.541	52.029	59.814	59.443	59.949	64.098	61.386	64.622	55.925	48.463	49.227	50.9	51.882	51.276	51.833	50.353	50.114	49.294	45.847	49.649	103.227	90.978	91.571	92.796	93.12	92.673	94.547	97.425	94.969	93.608	94.233	98.18
15.6667	940	11.243	9.859	10.48	10.878	11.239	11.557	11.08	10.961	10.886	11.341	9.755	12.4	37.663	38.575	39.171	53.673	53.647	54.151	62.127	61.631	62.253	66.263	63.614	66.929	57.796	50.453	51.088	53.212	54.151	53.69	54.09	52.888	52.718	51.802	48.049	51.949	103.806	91.351	92.337	93.392	93.814	93.22	94.859	98.059	95.576	93.739	94.518	98.561
16	960	11.304	10.127	10.647	10.984	11.345	11.755	11.129	11.049	10.963	12.214	10.135	13.204	39.722	40.053	40.733	55.729	55.62	56.11	64.72	64.273	64.867	68.973	66.447	69.945	60.202	52.433	53.075	55.51	56.278	55.567	56.292	55.145	54.882	54.016	50.09	54.153	104.086	92.149	92.735	93.89	94.327	93.778	95.284	98.665	96.129	94.176	94.843	98.943
16.3333	980	11.302	9.839	10.545	10.894	11.333	11.588	11.184	11.033	10.978	12.824	10.229	13.714	41.449	41.176	42.371	58.1	58.204	58.465	67.018	66.761	67.31	71.527	68.563	72.624	62.575	54.516	55.269	58.084	58.657	58.522	58.733	57.649	57.276	56.625	52.635	56.655	104.902	92.743	93.341	94.253	94.978	94.347	95.514	98.8	96.514	94.396	94.941	99.094
16.6667	1000	11.267	9.98	10.549	10.792	11.312	11.631	11.202	11.024	11.027	13.518	10.82	14.316	43.065	42.614	43.547	60.392	60.245	60.816	69.594	69.069	69.753	74.022	71.049	74.706	64.886	56.806	57.614	60.445	61.002	60.818	61.31	60.227	59.961	59.147	55.496	59.316	105.184	92.975	93.818	94.749	95.127	94.551	95.755	99.073	96.739	94.608	95.422	99.357
17	1020	11.302	9.994	10.655	10.914	11.369	11.696	11.369	11.192	11.169	14.071	11.635	14.769	44.667	41.892	45.153	62.596	62.335	62.818	71.886	71.855	72.125	76.673	74	77.355	67.122	58.629	59.514	62.867	63.325	63.129	63.72	62.602	62.367	61.639	57.71	61.82	105.571	93.447	94.21	95.127	95.484	94.924	95.894	99.243	96.853	94.88	95.359	99.641
17.3333	1040	11.306	10.122	10.665	11.076	11.465	11.776	11.375	11.296	11.167	14.335	12.263	14.904	45.924	43.224	46.049	64.824	64.939	65.394	74.58	74	74.722	78.957	75.916	79.806	69.788	60.606	61.81	65.318	66.078	65.7	66.322	65.19	64.759	64.069	60.394	64.324	106.447	93.708	94.547	95.463	95.963	95.302	95.992	99.459	97.475	95.241	95.982	100.039
17.6667	1060	11.227	10.004	10.525	10.89	11.347	11.712	11.29	11.214	11.182	14.329	12.782	14.965	47.357	44.522	47.6	67.316	67.4	67.508	77.096	76.724	77.506	80.941	78.284	82.343	72.616	62.971	64.447	67.984	68.367	68.278	68.8	67.92	67.731	66.89	62.806	67.129	106.241	94.339	94.945	95.524	96.151	95.465	96.263	99.41	97.104	95.529	96.057	100.184
18	1080	11.253	9.957	10.655	11.033	11.463	11.802	11.343	11.286	11.159	14.49	13.214	15.108	48.91	45.641	48.739	69.612	69.563	69.847	79.027	78.79	79.112	83.061	80.218	83.996	75.029	65.822	66.618	70.351	71.057	70.775	71.345	70.357	70.1	69.429	65.355	69.459	106.631	94.62	95.412	95.871	96.465	95.961	96.676	99.784	97.639	95.716	96.382	100.406
18.3333	1100	11.378	10.122	10.743	11.116	11.586	11.841	11.51	11.376	11.198	14.68	13.422	15.28	50.49	47.555	50.525	71.965	72.025	72.243	80.949	81.035	81.504	84.922	82.133	85.651	77.382	67.549	68.655	72.825	73.48	73.184	73.971	72.988	72.496	72.131	68.137	72.304	107.104	94.502	95.463	96.065	96.776	96.12	96.79	100.075	97.665	95.829	96.645	100.669
18.6667	1120	11.294	9.941	10.733	11.016	11.584	11.794	11.392	11.345	11.286	14.731	13.3	15.371	51.712	48.38	51.425	73.8	74.071	74.402	82.569	82.543	82.822	86.351	83.312	87.618	79.863	69.184	70.651	74.951	75.704	75.273	75.996	75.312	74.965	74.016	70.278	74.665	107.353	95.043	95.657	96.443	96.763	96.127	97.01	100.09	97.955	96.376	96.835	101.006
19.3333	1160	11.355	10.11	10.6	11.137	11.551	11.837	11.52	11.478	11.318	15.153	13.759	15.794	54.673	51.051	54.08	78.124	78.076	78.614	85.661	86.069	86.394	88.943	86.157	89.988	84.563	74.153	75.365	79.859	79.659	79.751	79.963	79.545	79.918	79.167	75.437	79.514	107.665	95.345	96.212	96.304	97.012	96.639	97.365	100.643	98.276	96.82	97.541	101.592
19.6667	1180	11.359	10.096	10.575	11.027	11.516	11.782	11.482	11.482	11.316	15.171	13.737	15.682	56.1	52.367	55.124	80.143	80.265	80.525	87.106	87.331	87.753	90.141	87.204	91.318	87.078	75.878	77.388	82.086	82.406	81.657	82.167	81.965	82.106	81.38	77.829	82.225	107.886	95.635	96.343	96.676	97.3	96.682	97.447	100.582	98.414	96.831	97.716	101.816
20	1200	11.394	10.037	10.537	11.01	11.58	11.859	11.484	11.422	11.408	15.229	13.933	15.845	57.724	53.802	56.539	82.365	82.329	82.529	88.012	88.747	89.373	91.378	88.273	92.735	90.057	78.388	79.984	84.18	84.312	83.349	84.355	84.118	84.418	83.898	80.198	84.845	108.516	96.035	96.618	97.047	97.594	96.873	98.035	101.188	98.867	97.576	98.235	102.382
20.3333	1220	11.361	9.971	10.712	11.063	11.575	11.841	11.449	11.49	11.394	15.271	14.043	15.878	59.208	55.265	58.184	83.649	83.924	84.324	89.222	89.894	90.453	91.982	89.125	93.618	91.967	80.829	81.998	85.824	86.675	85.302	85.996	86.027	86.312	85.696	82.516	86.9	108.559	96.09	96.867	97.129	97.575	96.851	97.859	101.275	99.227	97.794	98.216	102.378
21	1260	11.324	10.086	10.675	11.237	11.6	11.871	11.686	11.533	11.373	15.796	14.369	16.318	62.124	57.961	60.904	87.063	87.431	87.798	91.267	91.804	92.69	93.535	90.631	94.957	96.094	83.596	85.645	89.178	89.245	88.467	89.102	89.267	90.063	89.12	86.771	90.651	108.967	96.661	97.439	97.476	97.935	97.296	98.227	101.314	99.231	98.01	99.016	102.937
21.3333	1280	11.425	10.28	10.92	11.292	11.741	12.122	11.849	11.735	11.606	16.047	14.633	16.714	64.371	59.673	62.347	89.055	89.314	89.661	92.025	92.696	93.553	94.441	91.402	95.516	98.38	86.141	87.798	90.673	90.404	89.827	90.767	90.716	91.804	90.871	88.371	92.708	109.218	96.829	97.769	97.624	98.212	97.451	98.561	101.89	99.457	98.159	99.041	103.088
21.6667	1300	11.478	10.153	10.769	11.292	11.725	12.025	11.739	11.596	11.551	16.125	14.535	16.873	65.516	60.994	63.516	90.114	90.4	90.898	92.516	93.012	94.049	94.865	91.773	96.325	99.606	87.745	89.222	91.482	92.112	91.031	91.669	91.984	92.906	92.059	89.614	93.792	109.231	96.8	97.749	97.373	98.28	97.553	98.629	101.747	99.635	98.441	98.992	103.073
22	1320	11.48	10.327	10.871	11.355	11.847	12.12	11.904	11.829	11.629	16.418	14.833	17.043	67.31	62.6	65.253	90.886	91.657	92.637	93.541	93.6	94.302	95.267	92.135	96.902	100.649	88.365	90.624	92.567	93.251	92.414	92.902	92.978	93.927	92.794	91.045	95.347	109.533	96.869	97.865	97.7	98.355	97.769	98.718	102.059	99.798	98.398	99.178	103.357
22.3333	1340	11.504	10.196	10.888	11.4	11.851	12.055	11.865	11.839	11.745	16.614	15.153	17.159	68.996	64.384	66.516	92.935	93.057	93.653	93.776	94.225	95.38	96	92.99	97.598	101.825	89.398	91.863	93.457	94.061	93.057	93.665	94.025	95.237	94.106	92.522	96.257	109.584	97.18	97.99	97.739	98.569	97.778	99.131	102.427	100.071	98.869	99.339	103.606
22.6667	1360	11.492	10.265	10.853	11.373	11.804	12.071	11.855	11.761	11.637	16.594	15.133	17.155	70.318	65.549	67.567	93.727	94.004	94.427	94.01	94.545	95.316	96.173	93.102	98.002	102.861	90.182	92.653	94.225	94.849	93.973	94.216	94.516	95.741	94.949	93.114	97.186	109.829	97.269	98.337	98.075	98.545	97.716	98.908	102.453	99.988	98.982	99.498	103.776
23	1380	11.553	10.269	10.878	11.471	11.855	12.141	12.08	11.922	11.88	17.027	15.343	17.135	72.269	67.2	69.045	94.776	95.253	95.645	94.782	94.986	96.163	96.865	93.384	98.657	104.253	91.676	93.6	95.065	95.524	94.72	95.322	95.414	96.794	95.947	94.259	98.222	109.986	97.494	98.555	98.096	98.671	98.114	99.096	102.371	100.282	99.057	99.998	104.073
23.3333	1400	11.475	10.184	10.782	11.335	11.818	12.127	11.967	11.839	11.755	16.898	15.09	17.108	73.618	68.643	70.275	95.384	95.565	96.818	94.967	95.447	96.547	96.722	93.651	98.969	105.057	92.653	94.394	95.404	96.373	95.494	95.818	96.188	97.38	96.218	94.914	99.108	110.1	97.347	98.255	98.257	98.775	98.045	99.018	102.49	100.131	99.318	100.084	104.259
23.6667	1420	11.592	10.243	10.79	11.369	11.855	12.125	11.978	11.775	11.773	17.029	15.52	17.112	75.359	69.916	71.537	96.127	96.631	97.159	95.075	95.865	96.796	97.137	93.92	98.665	105.737	93.273	95.073	95.992	96.624	96.073	96.129	96.553	98.037	96.994	95.878	99.657	110.269	97.8	98.331	98.243	98.765	98.116	99.461	102.694	100.255	99.635	100.222	104.631
24	1440	11.847	10.545	11.196	11.867	12.229	12.416	12.355	12.169	12.137	17.578	16.008	17.514	77.218	71.38	73.355	96.853	97.527	98.173	95.678	96.092	97.473	97.514	94.371	99.292	106.129	93.914	95.92	96.547	97.186	96.645	96.816	97.006	98.788	97.52	96.575	100.184	110.512	97.714	98.561	98.461	98.865	98.392	99.384	102.749	100.375	99.886	100.541	104.792
24.3333	1460	11.694	10.361	10.935	11.584	12.002	12.316	12.122	12.006	11.996	17.72	16.129	17.457	78.686	72.867	74.686	97.263	98.047	98.822	96.069	96.41	97.571	97.288	94.208	99.422	106.447	93.91	96.616	96.802	97.869	97.059	97.312	97.653	99.153	97.955	97.059	100.992	110.48	97.99	98.839	98.51	99	98.325	99.49	102.745	100.7	100.055	100.749	104.996
24.6667	1480	11.675	10.406	11.008	11.545	11.922	12.282	12.059	11.98	11.963	17.582	16.069	17.667	80.208	74.318	75.847	97.788	98.227	98.933	96.271	96.765	98.012	97.418	94.822	99.269	106.622	94.027	96.912	97.253	98.245	97.543	97.651	98.159	99.422	98.729	97.584	101.253	110.794	98.024	98.888	98.557	99.151	98.263	99.78	103.165	100.702	100.078	100.876	105.11
25	1500	11.604	10.4	10.957	11.49	12.012	12.31	12.208	11.986	11.949	17.918	16.522	17.855	81.91	75.594	77.5	98.512	99.043	99.671	96.506	96.875	98.149	98.02	95.033	99.706	106.845	94.457	97.396	97.663	98.669	97.731	98.104	98.325	99.616	99.125	97.637	101.757	110.475	98.261	98.876	98.345	99.145	98.459	99.731	103.253	100.765	100.325	101.198	105.439
25.3333	1520	11.569	10.473	10.961	11.663	12.118	12.329	12.32	12.067	12.075	18.298	16.739	18.273	83.506	77.175	79.225	99.031	99.486	100.178	97.057	97.175	98.545	98.049	95.135	99.769	107.037	94.676	97.876	97.641	99.384	98.602	98.535	99.218	100.149	99.527	98.212	102.186	110.62	98.02	99.076	98.529	99.09	98.304	99.914	103.078	101.016	100.398	101.208	105.394
25.6667	1540	11.596	10.451	11.159	11.731	12.255	12.478	12.263	12.216	12.104	18.557	16.733	18.478	85.335	78.894	80.492	99.606	99.973	100.553	97.222	97.751	99.192	98.794	95.963	100.457	107.586	95.171	98.39	98.359	99.512	98.773	99.143	99.292	100.682	99.973	98.886	102.79	110.963	98.494	99.265	98.743	99.445	98.68	100.151	103.759	101.322	100.555	101.616	105.79
26	1560	11.731	10.343	11.059	11.69	12.286	12.478	12.382	12.186	12.069	18.755	16.773	18.731	86.455	79.853	81.353	99.716	99.869	101.094	97.433	97.961	98.992	98.863	95.757	100.963	107.133	95.131	98.651	98.476	99.755	99.165	99.075	99.643	100.725	99.751	98.929	102.959	110.784	98.212	99.218	98.594	99.157	98.739	100.082	103.6	101.373	100.906	101.571	105.939
26.3333	1580	11.763	10.449	10.937	11.61	12.143	12.312	12.357	12.116	12.004	18.794	16.676	18.973	87.925	80.865	82.365	99.994	100.286	101.245	97.706	98.222	99.186	98.657	96.147	100.929	107.804	95.682	98.676	98.761	100.314	99.647	99.473	100.124	100.863	99.784	99.112	103.063	111.306	98.608	99.247	98.81	99.245	98.727	100.427	103.78	101.378	100.969	101.59	106.212
26.6667	1600	11.796	10.437	11.006	11.622	11.986	12.247	12.445	12.086	12.108	18.751	16.908	19.194	89.229	82.133	83.627	100.31	100.531	101.694	97.829	98.351	99.402	98.759	96.294	100.876	107.933	95.996	98.865	98.753	100.669	99.616	99.808	100.363	100.661	99.98	99.218	103.01	110.969	98.518	99.535	98.653	99.465	98.773	100.588	103.825	101.578	101.118	102.098	106.08
27	1620	11.798	10.6	11.125	11.8	12.28	12.549	12.473	12.218	12.308	19.037	17.039	19.378	90.804	83.198	84.949	100.951	101.316	102.137	98.039	98.659	99.902	98.963	96.159	101.422	108.196	96.292	99.269	99.108	100.975	99.935	100.141	100.461	100.873	100.39	99.718	103.325	111.365	98.58	99.439	99.096	99.547	98.859	100.645	103.953	101.869	101.486	101.986	106.553
27.3333	1640	11.796	10.531	11.082	11.722	12.284	12.482	12.453	12.231	12.325	19.282	17.143	19.8	91.861	84.147	85.594	100.792	101.29	101.929	98.106	98.588	99.714	98.978	96.159	101.035	108.831	96.286	99.245	99.457	101.051	99.973	100.192	100.424	101.198	100.58	99.402	103.925	111.276	98.524	99.463	98.961	99.406	98.755	100.822	104.365	101.547	101.547	102.137	106.673
27.6667	1660	11.773	10.569	11.202	11.837	12.355	12.522	12.59	12.324	12.3	19.371	17.363	19.912	93.014	85.604	86.863	100.98	101.751	102.59	98.547	99.11	100.345	99.306	96.555	101.022	109.437	96.7	100.049	99.769	101.241	100.378	100.851	101.163	101.694	101.106	99.978	104.09	111.475	98.7	99.424	99.1	99.857	98.988	100.882	104.5	101.998	101.39	102.247	106.82
28	1680	11.861	10.553	11.149	11.91	12.314	12.508	12.529	12.331	12.325	19.651	17.288	20.186	93.741	86.241	87.706	100.902	101.516	102.68	98.361	98.802	100.237	99.096	96.663	101.675	109.549	96.902	100.029	99.706	101.559	100.427	100.925	101.304	102.027	101.047	100.218	104.245	111.22	99	99.724	99.175	99.771	98.91	100.969	104.467	102.125	101.706	102.435	106.875
28.3333	1700	11.859	10.643	11.218	11.833	12.282	12.68	12.616	12.467	12.353	19.559	17.547	20.414	95.214	87.094	88.637	101.086	101.618	102.755	98.388	98.643	100.184	99.118	96.331	100.908	109.737	97.165	100.094	99.943	101.778	100.816	100.927	101.339	101.994	101.271	100.584	104.649	111.653	98.931	99.667	99.255	99.696	98.947	101.157	104.514	102.188	101.959	102.806	106.978
28.6667	1720	11.835	10.608	11.318	11.951	12.459	12.737	12.62	12.488	12.288	19.71	17.808	20.875	96.273	87.986	89.62	101.441	102.016	103.292	98.669	99.378	100.478	99.367	96.541	101.659	109.886	97.316	100.225	100.298	101.975	101.084	101.433	101.814	102.3	101.637	100.955	104.965	111.669	98.898	99.524	99.267	99.743	99.149	101.492	104.931	102.212	102.002	102.788	107.167
29	1740	11.814	10.708	11.235	11.81	12.467	12.516	12.671	12.386	12.365	19.969	18.02	21.176	96.835	88.924	90.022	101.163	102.255	103.027	98.453	99.006	100.096	99.386	96.533	101.227	110.065	97.475	100.692	100.637	102.035	101.167	101.555	101.712	102.582	101.9	101.073	104.786	111.794	99.057	99.786	99.18	99.771	99.098	101.32	104.741	102.571	102.322	103.08	107.155
29.3333	1760	11.82	10.561	11.284	11.908	12.492	12.727	12.782	12.549	12.586	20.353	18.186	21.41	98.327	89.822	91.037	101.847	102.573	103.624	98.92	99.222	100.282	99.661	96.639	101.959	110.202	97.759	100.49	100.643	102.151	101.559	101.808	102.171	102.788	102.214	101.404	105.139	111.871	99.157	99.961	99.559	100.002	99.171	101.541	105.122	102.759	102.298	103.314	107.475
29.6667	1780	11.878	10.696	11.184	11.89	12.369	12.592	12.706	12.437	12.498	20.549	18.394	21.573	98.851	90.198	91.68	101.743	102.641	103.778	98.561	99.204	100.29	99.28	96.833	101.243	109.875	97.784	100.522	100.359	102.127	101.257	101.588	102.208	102.727	102.147	101.331	105.384	111.861	99.198	99.867	99.222	100.218	99.359	101.516	105.059	102.651	102.58	103.049	107.48
30	1800	11.929	10.675	11.3	12.039	12.465	12.794	12.835	12.576	12.504	20.904	18.645	22.094	99.849	90.994	92.514	102.327	102.869	104.004	98.855	99.475	100.278	99.565	96.953	101.89	110.071	98.214	100.592	100.827	102.192	101.498	102.057	102.282	102.818	102.455	101.541	105.551	111.963	99.333	99.9	99.714	100.135	99.653	101.722	105.31	102.916	102.576	103.3	107.81
30.3333	1820	12.031	10.733	11.431	12.071	12.449	12.761	12.851	12.706	12.653	21.163	19.055	22.492	100.418	91.557	92.847	102.461	102.8	104.075	98.514	99.069	100.261	99.471	96.747	101.398	109.941	97.82	100.396	100.616	102.351	101.312	101.702	102.153	102.739	102.329	101.449	105.345	111.967	99.173	100.029	99.551	100.325	99.602	101.831	105.155	102.722	102.843	103.482	107.908
30.6667	1840	12.014	10.729	11.396	12.188	12.443	12.851	12.892	12.484	12.675	21.378	19.122	22.669	101.471	92.314	93.276	102.649	103.175	104.422	98.678	99.275	100.227	99.639	96.692	101.541	110.504	98.269	100.557	100.869	102.467	101.512	101.933	102.516	103.149	102.761	101.988	105.498	112.227	99.427	100.206	99.547	100.376	99.657	101.822	105.482	103.027	102.914	103.567	107.871
31	1860	12.102	10.759	11.416	12.039	12.476	12.8	12.965	12.737	12.755	21.718	19.353	22.955	101.739	92.99	93.635	102.284	103.347	104.42	98.967	99.453	100.537	99.875	96.945	101.714	110.037	98.045	100.598	100.686	102.755	101.9	102.096	102.671	103.09	102.784	101.992	105.92	112.147	99.437	100.088	99.561	100.386	99.737	102.033	105.557	102.951	103.039	103.8	108.061
31.3333	1880	12.094	10.822	11.386	12.118	12.447	12.82	12.982	12.661	12.639	22.061	19.486	23.286	102.665	93.545	95.067	102.584	103.475	104.578	98.841	99.469	100.529	99.951	97.235	102.012	110.58	98.484	100.608	100.875	102.567	101.659	102.035	102.582	103.514	102.975	102.459	106.051	112.261	99.537	100.502	99.941	100.525	99.9	102.21	105.606	103.335	103.149	104	108.263
31.6667	1900	12.116	10.773	11.398	12.124	12.692	12.939	13.033	12.816	12.822	22.292	19.808	23.751	103.318	94.133	95.086	102.565	103.647	104.918	99.178	99.518	100.539	100.084	97.045	101.98	110.298	98.437	100.786	100.904	102.653	101.69	102.249	102.747	103.269	102.878	102.11	106.218	112.188	99.525	100.314	99.973	100.61	99.929	102.253	105.894	103.29	103.196	104.071	108.4
32	1920	12.124	10.861	11.518	12.231	12.637	12.951	13.141	12.918	12.963	22.516	19.82	23.835	103.694	94.604	95.278	102.443	103.433	104.553	98.898	99.349	100.635	100.065	97.065	101.925	110.549	98.443	100.873	100.806	102.684	101.788	101.975	102.475	103.304	102.708	102.235	105.88	112.324	99.492	100.361	100.155	100.639	99.68	102.402	105.649	103.42	103.224	103.99	108.494
32.3333	1940	12.222	10.822	11.549	12.214	12.649	12.937	13.159	12.796	12.712	22.776	20.196	24.151	104.337	95.108	96.055	102.686	103.492	104.708	98.933	99.48	100.418	100.037	97.133	102.112	110.678	98.38	101.141	100.904	102.631	102.018	101.975	102.704	103.671	103.165	102.304	106.02	112.363	99.369	100.573	100.024	100.475	99.965	102.28	105.92	103.573	103.42	104.165	108.341
32.6667	1960	12.176	10.882	11.443	12.124	12.631	12.902	12.902	12.996	12.91	23.112	20.482	24.359	105.1	95.312	96.333	102.404	103.312	104.704	98.678	99.212	100.71	100.035	97.025	101.694	110.378	98.657	101.016	101.18	102.535	101.973	102.129	102.702	103.447	102.869	102.114	105.765	112.241	99.71	100.425	100.341	100.622	100.169	102.716	106.041	103.696	103.425	104.208	108.604
33	1980	12.306	10.955	11.525	12.261	12.745	12.996	13.18	12.906	12.863	23.173	20.545	24.539	105.798	95.959	97.059	102.871	103.622	105.065	98.98	99.476	100.678	100.449	97.443	102.359	110.89	98.755	101	101.39	102.633	101.973	102.302	102.808	103.547	103.108	102.553	106.245	112.529	99.825	100.716	100.296	100.808	100.206	102.98	106.273	103.898	103.604	104.282	108.686
33.3333	2000	12.222	10.924	11.576	12.282	12.673	12.969	13.22	13.02	12.865	23.473	20.708	24.878	105.904	96.475	97.325	102.712	103.725	105.12	99.078	99.59	100.892	100.306	97.478	102.567	110.751	98.624	100.771	101.437	102.814	102.09	102.42	102.939	103.565	103.075	102.518	106.48	112.516	99.647	100.594	100.278	100.973	100.347	102.841	106.388	103.924	103.618	104.586	108.773
33.6667	2020	12.292	10.865	11.51	12.157	12.767	13.075	13.325	12.841	12.978	23.806	21.061	25.131	106.539	96.408	97.604	102.692	103.618	104.98	99.063	99.237	100.637	100.106	97.276	102.278	110.845	98.673	100.567	101.055	103	102.09	102.425	102.986	103.508	102.782	102.392	106.102	112.369	99.678	100.541	100.298	100.812	100.133	102.855	106.312	103.643	103.735	104.38	108.72
34	2040	12.345	10.886	11.578	12.365	12.763	12.935	13.204	13.071	13.098	23.959	21.239	25.376	106.824	97.131	98.19	102.692	103.557	104.788	99.116	99.859	100.335	100.418	97.478	102.267	110.973	98.822	100.814	101.198	103.086	102.125	102.329	102.798	103.651	103.043	102.516	106.329	112.569	99.747	100.659	100.565	100.957	100.324	103.12	106.555	103.943	103.898	104.692	108.937
34.3333	2060	12.418	11.071	11.651	12.4	12.845	13.125	13.396	12.984	13.094	24.263	21.455	25.639	107.588	97.608	98.745	102.976	103.729	104.865	99.418	100.204	101.051	100.467	97.778	102.725	111.176	98.976	101.002	101.339	103.029	102.184	102.408	103.075	103.814	103.322	102.643	106.22	112.782	99.988	100.916	100.563	101.192	100.425	103.12	106.618	104.182	104.006	104.635	109.286
34.6667	2080	12.306	11.018	11.661	12.367	12.778	13.137	13.341	12.876	13.108	24.504	21.606	25.782	107.775	97.555	98.784	102.516	103.669	105.049	99.449	99.843	100.718	100.675	97.598	102.69	111.102	98.99	100.955	101.361	103.192	102.471	102.614	103.106	103.827	103.276	102.465	106.561	112.616	99.88	100.671	100.449	101.161	100.602	103.171	106.606	104.082	103.892	104.818	109.075
35	2100	12.359	10.967	11.594	12.304	12.876	13.18	13.273	13.059	13.069	24.618	21.839	25.816	107.686	97.92	98.476	102.445	103.476	104.512	99.149	99.582	100.343	100.388	97.392	102.463	110.765	98.843	100.727	101.19	103.043	102.437	102.594	103.11	103.784	103.057	102.671	106.322	112.602	99.682	100.767	100.455	101.124	100.359	103.094	106.645	103.982	103.912	104.684	109.118
35.3333	2120	12.431	10.996	11.639	12.282	12.796	13.024	13.316	13.067	13.153	24.814	22.022	25.973	108.741	98.633	99.578	102.733	103.727	104.788	99.529	99.976	100.382	100.829	97.751	102.549	111.439	98.998	101.306	101.335	102.975	102.329	102.404	103.065	103.841	103.235	102.796	106.296	112.635	100.041	100.696	100.769	101.257	100.667	103.284	106.614	104.478	104.333	105.09	109.245
35.6667	2140	12.318	11.057	11.761	12.312	12.975	13.161	13.235	13.059	13.035	24.984	22.173	26.361	109.149	99.029	100.082	103.031	103.851	105.053	99.482	99.935	100.782	100.908	97.878	102.769	111.445	99.102	101.082	101.645	103.008	102.214	102.665	102.933	104.063	103.361	102.784	106.606	112.786	100.129	100.845	100.867	101.373	100.653	103.484	106.739	104.376	104.261	104.849	109.394
36	2160	12.416	11.071	11.733	12.414	12.931	13.18	13.327	13.027	13.182	25.21	22.333	26.52	109.169	98.998	99.967	103.041	103.79	105.106	99.524	100.155	100.884	100.965	97.982	103.094	111.245	99.386	100.875	101.631	103.171	102.333	102.822	103.049	103.925	103.522	103.18	106.733	112.91	100.4	100.965	100.739	101.398	100.81	103.463	107.014	104.639	104.331	105.086	109.339
36.3333	2180	12.406	11.112	11.651	12.541	12.945	13.245	13.337	13.004	13.161	25.416	22.455	26.835	109.714	99.408	100.22	102.955	103.941	105.092	99.531	100.173	100.92	101.008	97.91	102.829	111.7	99.169	101.006	101.429	103.353	102.582	102.802	103.329	103.894	103.427	102.822	106.596	112.988	99.916	101.214	100.953	101.22	100.818	103.418	106.953	104.696	104.314	105.055	109.527
36.6667	2200	12.384	11.171	11.808	12.643	13.063	13.361	13.371	13.151	13.139	25.61	22.737	27.186	110.345	99.731	100.91	103.051	104.149	105.214	99.618	100.471	101.031	100.953	98.137	102.943	111.975	99.424	101.433	101.771	103.514	102.584	103.127	103.365	103.861	103.565	103.202	107.012	113.143	99.959	101.286	101.006	101.512	100.833	103.525	107.19	104.833	104.335	105.22	109.698
37	2220	12.465	11.135	11.81	12.522	12.967	13.322	13.284	13.139	13.173	25.647	22.955	27.269	110.282	100.231	100.912	102.849	103.88	105.059	99.804	100.565	100.792	101.016	98.063	103.247	112.031	99.535	101.429	101.841	103.259	102.524	102.982	103.569	104.098	103.557	102.992	106.961	112.814	100.135	101.022	100.857	101.557	100.924	103.49	107.073	104.684	104.645	105.376	109.739
37.3333	2240	12.459	11.18	11.81	12.612	13.059	13.459	13.425	13.194	13.092	25.988	23.086	27.459	110.222	99.855	100.804	102.604	103.833	105.071	100.043	100.155	101.118	101.165	98.098	102.769	111.72	99.527	101.431	101.684	103.667	103.129	103.32	103.749	104.439	103.545	103.151	107.037	112.871	100.186	100.869	100.79	101.51	100.843	103.533	107.271	104.673	104.622	105.263	109.657
37.6667	2260	12.465	11.137	11.798	12.624	12.914	13.263	13.396	13.276	13.086	26.108	23.243	27.633	110.743	100.227	101.12	102.918	103.859	104.806	99.81	100.543	101.045	101.21	98.278	103.312	112.157	99.512	101.482	101.835	103.318	102.802	103.241	103.724	104.451	104.033	103.467	107.102	113.247	100.024	101.265	101.169	101.649	101.102	103.763	107.047	104.945	104.767	105.292	109.835
38	2280	12.498	11.171	11.835	12.592	12.984	13.225	13.416	13.178	13.28	26.269	23.206	27.898	111.218	100.253	101.345	102.835	103.945	104.951	99.775	100.371	100.89	101.567	98.282	103.259	112.12	99.769	101.51	101.994	103.706	102.971	103.427	103.859	104.551	103.924	103.435	107.394	113.141	100.102	101.388	101.124	101.808	101.141	103.79	107.322	104.916	104.847	105.469	109.851
38.3333	2300	12.531	11.147	11.749	12.673	13.167	13.418	13.506	13.345	13.212	26.447	23.486	28.053	111.11	100.541	101.598	102.959	103.908	105.094	100.239	100.62	101.112	101.398	98.459	103.402	112.39	100.116	101.669	102.304	104.163	103.257	103.769	104.127	104.58	104.094	103.378	107.255	113.292	100.245	101.102	101.098	101.718	101.216	103.775	107.433	104.957	104.655	105.445	109.873
38.6667	2320	12.529	11.233	11.847	12.712	13.061	13.333	13.602	13.325	13.394	26.759	23.69	28.392	111.396	101.1	102.098	103.125	104.075	105.098	99.839	100.718	101.306	101.633	98.576	103.741	112.822	100.341	102.045	102.725	104.073	103.233	103.708	104.253	104.8	104.463	103.669	107.882	113.182	100.239	101.28	101.202	101.702	101.145	103.988	107.467	105.018	104.855	105.459	110.249
39	2340	12.573	11.243	11.951	12.759	13.184	13.527	13.696	13.337	13.353	27.063	24.002	28.471	111.708	100.937	102.012	103.451	104.31	105.388	100.463	100.994	101.363	101.737	98.629	103.902	112.965	100.663	102.153	102.902	104.561	103.776	103.959	104.633	105.212	104.584	103.822	107.753	113.251	100.4	101.371	101.398	102.014	101.204	104.167	107.557	105.106	104.853	105.68	110.312
39.3333	2360	12.482	11.227	11.916	12.875	13.208	13.529	13.645	13.443	13.402	27.204	24.018	28.665	112.335	101.373	102.429	103.198	104.369	105.388	100.306	101.125	101.79	102.273	99.016	104.222	113.396	100.82	102.48	103.443	104.618	104.043	104.273	104.71	105.529	105.145	104.104	108.496	113.286	100.557	101.341	101.235	102.155	101.265	104.163	107.635	105.461	105.031	105.78	110.255
39.6667	2380	12.553	11.21	11.871	12.743	13.133	13.643	13.686	13.471	13.416	27.427	24.247	28.929	112.32	101.588	102.635	103.278	104.329	105.078	100.422	100.578	101.314	102.135	99.351	104.218	113.373	100.876	102.661	103.169	105.106	104.473	104.222	104.906	105.437	104.939	104.375	107.982	113.369	100.533	101.345	101.404	102.043	101.327	104.137	107.553	105.28	104.776	105.616	109.961
40	2400	12.516	11.3	11.982	12.896	13.251	13.612	13.763	13.461	13.388	27.541	24.331	29.059	112.543	101.518	102.841	103.282	104.357	105.594	100.882	101.273	102.008	102.678	99.735	104.843	113.863	101.225	102.918	103.471	104.947	104.288	104.625	105.304	105.863	105.373	104.584	108.569	113.41	100.441	101.455	101.459	102.29	101.625	104.29	107.694	105.48	104.969	105.855	110.241
40.3333	2420	12.671	11.261	12.018	12.875	13.339	13.651	13.716	13.6	13.475	27.782	24.637	29.376	112.806	101.906	102.945	103.661	104.471	105.82	101.182	101.59	102.453	102.665	99.853	105.096	113.949	101.367	103.127	103.529	105.273	104.559	105.076	105.535	106.051	105.471	104.978	109.049	113.378	100.276	101.543	101.439	102.28	101.273	104.29	107.761	105.455	105.061	105.778	110.282
40.6667	2440	12.567	11.302	11.957	12.892	13.408	13.616	13.814	13.573	13.59	27.951	24.576	29.516	112.745	102.167	103.276	103.414	104.62	105.673	101.506	101.963	102.465	103.186	100.11	105.276	114.202	101.482	102.902	103.924	105.39	104.606	104.884	105.518	106.333	105.661	104.941	109	113.418	100.447	101.353	101.48	102.153	101.553	104.443	107.829	105.333	105.045	105.737	110.375
41	2460	12.651	11.259	11.894	12.81	13.255	13.596	13.767	13.563	13.625	28.104	24.924	29.635	113.251	102.225	103.269	103.48	104.261	105.588	101.408	102.073	102.855	103.218	100.176	105.643	114.271	101.575	103.449	103.92	105.516	104.52	104.81	105.663	106.208	105.655	105.149	109.049	113.6	100.525	101.582	101.524	102.131	101.386	104.259	107.861	105.443	104.967	105.922	110.316
41.3333	2480	12.69	11.355	11.827	12.739	13.32	13.557	14	13.759	13.584	28.302	24.961	29.896	113.329	102.42	103.345	103.555	104.571	105.661	102.029	102.363	103.11	103.816	100.678	105.643	114.592	101.702	103.608	104.324	105.741	105.01	105.367	105.708	106.51	106.008	105.602	109.553	113.514	100.624	101.641	101.465	102.282	101.788	104.49	107.841	105.576	105.182	106.112	110.614
41.6667	2500	12.747	11.371	11.965	12.896	13.29	13.643	14.02	13.655	13.759	28.429	25.251	30.12	113.698	102.829	103.829	103.653	104.329	105.835	102.349	102.651	103.255	103.998	100.878	105.696	114.543	101.965	103.547	103.957	105.755	105.055	105.492	105.831	106.622	106.239	105.424	109.441	113.502	100.653	101.531	101.653	102.259	101.535	104.424	107.714	105.471	105.329	105.955	110.463
42	2520	12.794	11.329	12.125	13.018	13.357	13.89	13.955	13.771	13.706	28.69	25.396	30.255	113.765	103.049	103.692	103.696	104.531	105.633	102.292	102.88	103.422	103.857	100.855	106.029	114.802	102.067	103.796	104.263	105.922	105.341	105.459	106.161	106.818	105.949	105.425	109.38	113.557	100.688	101.453	101.871	102.306	101.786	104.496	108.01	105.667	105.406	106.114	110.508
42.3333	2540	12.718	11.347	12.059	12.941	13.445	13.731	14.078	13.778	13.802	28.91	25.661	30.496	113.818	103.139	103.906	103.437	104.778	105.945	102.835	103.186	103.69	104.202	101.212	106.188	114.769	102.096	103.971	104.459	106.224	105.727	105.875	106.416	106.767	106.249	105.424	109.867	113.657	100.825	101.825	101.831	102.596	101.843	104.498	108.055	105.806	105.508	106.104	110.443
42.6667	2560	12.79	11.38	12.051	12.984	13.529	13.869	14.153	13.859	13.859	29.131	25.894	30.859	114.086	102.949	103.912	104	104.547	105.614	102.663	103.218	103.851	104.163	101.133	106.037	114.986	102.196	104.212	104.618	106.063	105.547	105.416	106.155	106.802	106.378	105.5	110.014	113.808	100.729	101.657	101.659	102.439	101.61	104.506	107.961	105.61	105.551	106.169	110.649
43	2580	12.804	11.345	12.102	12.976	13.516	13.863	14.09	13.857	13.778	29.263	25.884	30.927	114.188	103.184	104.208	103.794	104.508	106.037	103.029	103.239	104.194	104.192	101.39	106.112	115.171	102.361	104.031	104.686	106.435	106.002	105.986	106.794	106.92	106.473	105.845	110.239	113.506	100.561	101.714	101.851	102.512	101.684	104.665	108.224	105.782	105.612	106.002	110.58
43.3333	2600	12.761	11.363	12.1	13.125	13.522	13.759	14.249	13.918	13.949	29.439	26.143	31.19	114.667	103.565	104.582	104.153	104.912	105.969	103.222	103.853	104.21	104.59	101.49	106.59	115.271	102.629	104.5	104.708	106.367	105.963	106.02	106.565	107.351	106.549	106.143	110.212	113.831	100.812	101.735	102.078	102.512	101.973	104.696	108.404	105.688	105.498	106.245	110.633
43.6667	2620	12.759	11.402	12.055	12.947	13.531	13.755	14.171	13.967	13.914	29.584	26.169	31.38	114.618	103.6	104.473	104.261	104.918	105.839	103.176	103.708	104.167	104.488	101.455	106.418	115.565	102.539	104.71	104.945	106.29	105.704	106.022	106.602	107.161	106.704	106.376	110.42	113.676	100.882	101.816	101.986	102.486	101.802	104.751	108.212	105.894	105.657	106.333	110.884
44	2640	12.778	11.465	12.082	13.098	13.673	13.914	14.31	14.012	14.135	29.802	26.459	31.424	114.596	103.512	104.343	104.202	104.688	105.949	103.133	103.557	104.045	104.563	101.478	106.237	115.692	102.869	104.482	104.867	106.555	105.892	106.288	106.812	107.414	106.998	106.269	110.284	114.206	100.892	101.735	102.09	102.622	102.055	104.9	108.431	106.175	105.586	106.435	110.684
44.3333	2660	12.786	11.492	12.149	13.21	13.627	13.998	14.3	14.012	14.106	30.086	26.643	31.784	114.649	103.402	104.476	104.114	105.01	106.247	103.292	103.855	104.408	104.49	101.598	106.678	115.355	102.896	104.504	105.147	106.625	106.222	106.351	106.627	107.461	107.059	106.333	110.345	113.667	100.908	101.669	102.094	102.445	102.157	104.894	108.463	106.088	105.647	106.422	110.906
44.6667	2680	12.892	11.449	12.149	13.21	13.704	14.049	14.255	14.076	13.971	30.202	26.835	32.037	114.878	103.737	104.606	104.173	105.106	106.447	103.431	103.778	103.9	104.614	101.633	106.476	115.867	102.973	104.737	105.247	106.696	106.349	106.253	107.069	107.467	106.953	106.625	110.573	113.873	100.957	101.867	102.118	102.649	101.976	104.876	108.12	105.841	105.531	106.375	110.933
45	2700	12.869	11.447	12.029	13.145	13.539	13.937	14.349	14.108	14.116	30.261	26.918	32.029	115.239	103.918	105.002	104.292	105.241	106.398	103.325	103.951	104.267	104.822	101.741	106.367	115.941	102.924	104.81	105.245	106.712	106.204	106.494	106.918	107.559	107.284	106.598	110.704	113.939	100.859	101.796	102.278	102.837	102.2	104.861	108.482	105.963	105.82	106.398	110.876
45.3333	2720	12.982	11.443	12.153	13.235	13.757	13.988	14.463	14.186	14.1	30.457	27.018	32.012	115.01	103.684	104.818	104.386	105.265	106.414	103.331	103.925	104.247	104.882	101.818	106.796	116.039	103.206	105.09	105.206	106.892	106.363	106.488	106.912	107.861	107.494	106.675	110.918	113.912	100.996	101.861	102.257	102.737	102.114	104.975	108.508	106.3	105.698	106.525	110.908
45.6667	2740	12.863	11.488	12.145	13.29	13.659	14.11	14.425	14.275	14.241	30.641	27.171	32.227	115.192	103.749	105.084	104.298	105.069	106.508	103.231	103.818	104.371	104.961	101.751	106.643	115.988	103.116	105.055	105.518	106.792	106.271	106.614	107.045	107.68	107.114	106.616	110.829	113.798	101.029	102.037	102.08	102.89	102.104	104.925	108.461	105.99	105.724	106.351	111.024
46	2760	12.947	11.459	12.312	13.361	13.869	14.035	14.429	14.227	14.233	30.967	27.578	32.825	115.261	103.753	105.075	104.559	105.302	106.622	103.588	103.939	104.357	104.853	101.775	106.539	116.32	103.449	105.184	105.343	107.265	106.943	106.794	107.306	107.78	107.269	106.925	110.661	113.79	101.078	101.741	102.188	102.645	102.129	104.957	108.58	106.063	105.741	106.459	110.994
46.3333	2780	12.939	11.529	12.127	13.267	13.655	14.086	14.531	14.3	14.259	30.769	27.569	32.641	115.206	103.778	104.761	104.922	105.524	106.7	103.443	104.2	104.451	104.882	101.959	107.069	116.037	103.322	105.08	105.618	107.065	106.469	106.539	107.255	107.831	107.482	106.847	110.898	113.906	101.022	101.698	102.118	102.659	102.29	105.047	108.543	106.402	105.939	106.449	110.927
46.6667	2800	13.153	11.79	12.412	13.592	14.084	14.39	14.78	14.457	14.524	31.247	27.8	32.857	115.273	104.173	105.053	104.71	105.255	106.586	103.573	104.192	104.433	104.755	102.024	106.567	116.441	103.333	105.141	105.58	107.069	106.775	106.816	107.382	107.843	107.345	106.653	110.831	113.961	101.018	102.065	101.984	102.729	102.318	104.971	108.592	106.176	105.743	106.614	111.306
47	2820	12.955	11.553	12.086	13.3	13.667	14.055	14.639	14.335	14.318	31.357	27.931	32.782	115.129	103.794	104.863	104.784	105.461	106.563	103.351	104.061	104.522	104.816	101.896	106.941	116.355	103.41	105.233	105.394	107.2	106.718	106.98	107.492	108.124	107.575	107.233	111.235	113.955	101.018	101.967	102.412	103.022	102.304	104.973	108.592	106.224	106.031	106.671	111.206
47.3333	2840	12.971	11.62	12.337	13.39	14.082	14.284	14.712	14.498	14.51	31.31	28.186	33.006	115.437	104.431	105.349	104.771	105.755	107.033	103.576	104.253	104.608	105.114	102.178	107.19	116.584	103.614	105.684	105.812	107.461	106.837	106.971	107.445	108.069	107.99	107.124	111.259	114.147	101.151	102.19	102.265	102.888	102.404	104.988	108.741	106.282	105.931	106.824	111.363
47.6667	2860	13.194	11.822	12.398	13.637	14.208	14.324	14.908	14.625	14.712	31.363	28.29	33.18	115.451	104.025	105.049	105.21	105.712	106.714	103.606	104.276	104.5	105.027	102.104	107.039	116.578	103.578	105.473	105.825	107.202	107.004	106.953	107.49	108.173	107.712	106.976	110.998	113.947	100.927	101.865	102.529	102.869	102.376	105.245	108.714	106.545	105.894	106.59	111.029
48	2880	12.984	11.625	12.169	13.412	13.931	14.163	14.718	14.524	14.553	31.637	28.647	33.314	115.394	104.088	104.851	105.359	106.067	107.033	103.737	104.28	104.602	104.986	102.345	107.422	116.843	103.729	105.602	105.669	107.539	107.237	106.978	107.624	108.276	107.857	107.322	111.243	114.286	101.173	102.129	102.414	103.112	102.375	105.082	108.622	106.525	105.81	106.767	111.129
48.3333	2900	13.08	11.682	12.276	13.459	13.843	14.259	14.812	14.508	14.547	31.59	28.692	33.39	115.563	104.122	105.076	105.475	106.214	107.378	103.833	104.376	104.955	105.318	102.343	107.431	116.955	104.202	105.829	106.151	107.384	106.914	107.255	107.665	108.547	108.116	107.335	111.761	114.145	101.359	102.343	102.541	103.21	102.59	105.451	108.965	106.702	106.229	106.847	111.506
48.6667	2920	13.163	11.639	12.351	13.578	14.039	14.341	14.888	14.635	14.584	31.808	28.761	33.688	115.239	103.943	105.137	105.72	106.559	107.6	103.971	104.665	105.012	105.488	102.71	107.567	116.845	104.09	105.722	105.978	107.896	107.282	107.373	108.084	108.676	108.225	107.502	111.649	114.11	101.045	102.116	102.655	103.235	102.531	105.445	108.939	106.675	106.145	107.127	111.371
49	2940	13.096	11.622	12.288	13.588	14.092	14.31	14.882	14.676	14.625	31.929	29.194	33.91	115.38	103.861	104.988	105.72	106.263	107.233	103.716	104.502	104.618	105.565	102.622	107.563	116.884	104.08	105.794	106.004	107.71	107.263	107.249	108.031	108.624	108.114	107.622	111.625	114.312	101.245	102.149	102.467	103.231	102.639	105.51	108.867	106.486	106.094	107.094	111.204
49.3333	2960	13.084	11.753	12.314	13.545	14.033	14.363	14.863	14.676	14.676	32.122	29.124	33.857	115.286	104.149	105.09	105.731	106.535	107.392	104.065	104.569	104.943	105.676	102.596	108.129	117.163	104.214	105.949	106.208	107.684	107.357	107.382	108.149	108.62	107.99	107.688	112.076	114.406	101.222	102.32	102.661	103.331	102.496	105.371	108.976	106.598	106.28	107.025	111.486
49.6667	2980	13.106	11.661	12.294	13.563	14.1	14.378	14.929	14.682	14.755	32.237	29.073	33.955	115.506	104.188	105.21	106.002	106.747	107.735	104.153	105.114	105.357	105.851	102.859	108.069	117.345	104.304	106.296	106.459	107.802	107.431	107.582	108.194	108.833	108.341	107.545	112.08	114.265	101.331	102.375	102.612	103.443	102.655	105.451	109.02	106.625	106.184	107.094	111.529
50	3000	13.192	11.714	12.169	13.51	14.078	14.367	14.859	14.782	14.829	32.412	29.157	34.247	115.522	104.167	105.29	105.894	106.631	107.614	104.443	104.816	105.308	106.276	102.79	107.963	117.176	104.233	106.131	106.506	107.871	107.329	107.618	108.063	108.749	108.441	107.816	111.861	114.38	101.261	102.275	102.714	103.369	102.7	105.545	109.151	106.488	106.361	106.998	111.261
50.3333	3020	13.163	11.698	12.375	13.622	14.108	14.467	15.002	14.729	14.859	32.645	29.416	34.331	115.122	103.749	105.065	105.986	106.565	107.786	104.437	105.051	105.329	106.088	102.851	108.116	117.349	104.373	106.141	106.692	108.1	107.737	107.757	108.414	108.91	108.522	107.81	112.465	114.247	101.247	102.235	102.524	103.427	102.647	105.596	109.173	106.604	106.229	106.976	111.722
50.6667	3040	13.243	11.753	12.384	13.778	14.176	14.365	14.965	14.751	14.912	32.545	29.296	34.659	115.347	103.712	104.773	106.084	106.675	108.127	104.631	105.08	105.529	106.333	103.122	108.18	117.488	104.416	106.049	106.473	108.173	107.849	107.806	108.486	109.222	108.404	107.859	112.165	114.086	101.212	102.022	102.733	103.161	102.651	105.531	108.782	106.586	106.214	106.965	111.469
51	3060	13.516	12.01	12.704	14.006	14.531	14.792	15.29	15.037	15.169	32.914	29.359	34.782	115.524	104.294	105.294	106.535	106.937	107.9	104.908	105.263	105.906	106.424	103.2	108.716	117.724	104.494	106.371	106.463	108.116	107.698	107.916	108.488	109.086	108.806	108.265	112.259	114.482	101.675	102.373	102.755	103.508	102.622	105.504	109.033	106.7	106.488	107.124	111.596
51.3333	3080	13.22	11.792	12.306	13.71	14.143	14.471	15.065	14.82	15.025	33.043	29.631	34.933	115.143	104.049	105.125	106.378	107.21	108.08	104.941	105.52	105.931	106.565	103.584	108.847	117.61	104.486	106.606	106.741	108.171	107.871	107.902	108.486	109.212	108.663	108.175	112.716	114.273	101.439	102.329	102.798	103.363	102.731	105.718	109.018	106.718	106.559	107.222	111.676
51.6667	3100	13.22	11.722	12.478	13.718	14.294	14.48	15.149	14.798	14.951	33.073	29.667	34.984	115.271	104.153	105.298	106.488	107.363	108.2	105.078	105.5	106.159	106.561	103.59	108.904	117.576	104.657	106.447	106.802	108.273	108.022	107.92	108.633	109.369	108.924	108.394	112.522	114.539	101.375	102.139	102.971	103.275	102.918	105.625	109.318	106.927	106.445	107.294	111.643
52	3120	13.157	11.765	12.318	13.69	14.122	14.422	15.098	14.888	14.947	33.151	29.696	35.267	115.267	103.841	105.19	106.516	107.227	108.237	105.031	105.659	106.296	106.851	103.61	108.814	117.969	104.592	106.475	106.684	108.233	108.084	108.106	108.708	109.365	108.855	108.606	112.569	114.516	101.327	102.404	102.825	103.48	102.775	105.52	109.261	106.922	106.48	107.159	111.669
52.3333	3140	13.169	11.835	12.39	13.624	14.239	14.531	15.204	14.843	15.098	33.449	30.229	35.276	114.894	103.963	105.059	106.555	107.384	108.216	105.139	105.58	106.345	106.647	103.608	108.724	117.667	104.72	106.4	106.782	108.276	108.167	108.269	108.651	109.267	108.88	108.21	112.676	114.233	101.245	102.224	102.859	103.561	102.924	105.647	109.367	106.894	106.441	107.051	111.561
52.6667	3160	13.337	11.91	12.414	13.892	14.408	14.508	15.241	14.955	15.051	33.457	30.163	35.28	115.431	104.061	105.143	106.802	107.284	108.669	105.29	106.096	106.494	106.659	103.855	109.035	117.888	104.878	106.751	107.063	108.51	108.206	108.359	108.81	109.461	108.847	108.241	112.859	114.5	101.506	102.453	102.822	103.525	102.784	105.769	109.28	107.004	106.6	107.4	111.8
53	3180	13.275	11.914	12.424	13.782	14.369	14.698	15.224	14.896	15.027	33.651	30.247	35.545	115.208	103.698	104.69	106.839	107.322	108.598	105.371	106.143	106.714	107.037	103.963	109.155	117.645	105.031	106.692	106.933	108.555	108.386	108.52	108.937	109.396	108.945	108.39	112.565	114.296	101.243	102.225	102.865	103.459	102.994	105.825	109.31	106.927	106.363	107.208	111.912
53.3333	3200	13.341	11.904	12.331	13.725	14.28	14.584	15.373	15.027	15.151	33.91	30.512	35.767	115.312	104.341	105.141	107.243	107.631	108.833	105.784	106.202	106.88	107.463	104.012	109.453	118.235	105.137	106.906	107.341	108.649	108.373	108.641	109.051	109.725	109.339	108.818	112.884	114.635	101.651	102.333	103.114	103.624	103.067	105.765	109.553	107.022	106.612	107.447	111.918
53.6708	3220.25	13.471	11.937	12.455	13.769	14.302	14.588	15.318	15.065	15.165	34.043	30.51	35.916	115.408	104.2	105.371	107.375	108.022	108.971	105.92	106.431	107.071	107.512	104.586	109.678	118.31	105.224	107.175	107.347	108.543	108.38	108.688	109.057	109.869	109.514	108.718	113.171	114.427	101.49	102.4	103.267	103.61	103.067	105.949	109.518	107.335	106.622	107.296	111.849
54	3240	13.376	11.925	12.539	13.843	14.429	14.7	15.373	15.033	15.2	34.376	30.798	36.137	115.392	103.847	104.957	106.955	107.516	108.678	105.912	106.424	107.043	107.439	104.424	109.641	118.378	105.269	106.861	107.247	108.992	108.573	108.51	108.982	109.478	109.127	108.431	113.265	114.586	101.549	102.288	102.945	103.61	103.027	105.929	109.375	107.033	106.445	107.406	111.824
54.3333	3260	13.335	11.88	12.547	13.837	14.406	14.61	15.455	15.09	15.235	34.18	30.739	36.094	114.969	103.551	105.002	106.988	107.508	108.727	105.767	106.457	106.931	107.504	104.353	109.871	118.178	105.214	106.908	107.29	108.741	108.573	108.488	109.027	109.496	109.3	108.733	113.282	114.425	101.38	102.28	102.898	103.471	102.908	105.814	109.269	107.02	106.655	107.165	111.7
54.6667	3280	13.427	11.99	12.545	14.004	14.488	14.545	15.463	15.129	15.3	34.525	30.965	36.463	115.663	104.075	105.351	107.582	108.282	109.133	106.224	106.569	107.451	107.957	104.716	110.116	118.637	105.629	107.202	107.627	108.878	108.608	108.731	109.359	110.002	109.722	108.853	113.5	114.629	101.488	102.814	103.363	103.933	103.169	106.147	109.541	107.031	106.875	107.496	112.02
55	3300	13.429	11.896	12.49	13.92	14.425	14.582	15.375	15.092	15.341	34.457	30.857	36.506	115.208	103.784	105.171	107.316	107.682	108.806	105.916	106.42	107.284	107.725	104.518	110.027	118.4	105.225	107.045	107.365	108.771	108.731	108.806	109.445	110.118	109.678	109.259	113.222	114.735	101.494	102.473	103.018	103.794	102.957	105.631	109.353	106.82	106.729	107.563	111.988
55.3333	3320	13.463	12.065	12.61	14.059	14.49	14.61	15.475	15.178	15.324	34.882	31.218	36.608	115.159	104.12	105.153	107.506	108.212	109.212	106.308	106.984	107.335	107.929	104.884	110.18	118.688	105.308	107.302	107.539	108.949	108.867	108.859	109.349	110.192	109.641	109.286	113.424	114.675	101.392	102.639	103.202	103.769	103.298	106.016	109.392	107.353	106.794	107.502	112.1
55.6667	3340	13.355	12.008	12.498	13.855	14.584	14.651	15.588	15.135	15.343	34.971	31.414	36.851	115.261	104.075	105.182	107.394	108.247	108.898	106.178	106.625	107.451	108.027	104.729	110.006	118.773	105.325	107.196	107.557	108.825	108.788	108.867	109.376	109.906	109.698	109.204	113.396	114.514	101.547	102.465	103.276	103.661	103.073	105.929	109.392	107.227	106.735	107.488	112.094
56.0042	3360.25	13.49	12.112	12.629	14.051	14.549	14.706	15.641	15.184	15.453	35.124	31.627	37.004	115.588	104.296	105.412	107.924	108.527	109.504	106.651	107.298	107.69	108.588	105.09	110.416	118.865	105.516	107.596	107.884	109.216	108.984	109.198	109.514	110.422	109.894	109.502	113.825	114.647	101.633	102.671	103.182	103.851	103.067	106.078	109.755	107.398	106.782	107.551	112.212
56.3333	3380	13.347	12.047	12.594	13.961	14.451	14.655	15.549	15.204	15.437	35.32	31.465	37.4	115.506	104.178	105.055	107.627	108.178	109.363	106.345	106.847	107.516	108.38	104.9	110.343	118.802	105.469	107.425	107.584	108.861	108.676	108.71	109.457	110.243	109.751	109.298	113.798	114.573	101.278	102.478	103.3	103.716	103.367	106.008	109.567	107.182	106.804	107.427	112.061
56.6708	3400.25	13.537	12.082	12.571	14.024	14.49	14.776	15.465	15.249	15.429	35.457	31.571	37.367	115.424	104.188	105.424	107.925	108.429	109.551	106.704	107.225	108.006	108.484	105.192	110.765	118.822	105.704	107.557	107.892	109.416	109.053	109.024	109.596	110.243	109.965	109.494	113.835	114.516	101.435	102.565	103.376	104.055	103.404	106.065	109.649	107.357	106.835	107.778	112.273
57.0042	3420.25	13.551	11.992	12.633	13.971	14.416	14.643	15.582	15.231	15.427	35.547	31.731	37.502	115.655	104.1	105.257	107.829	108.422	109.645	106.622	107.176	107.535	108.6	105.376	110.812	119.088	105.531	107.625	107.743	109.147	108.929	109.276	109.706	110.239	110.002	109.675	113.92	114.563	101.594	102.782	103.365	104.096	103.355	105.961	109.525	107.376	106.898	107.753	112.394
57.3333	3440	13.535	12.078	12.618	14.075	14.602	14.79	15.704	15.351	15.437	35.712	32.033	37.645	115.278	104.096	105.192	107.671	108.235	109.475	106.575	107.039	107.614	108.355	105.455	110.51	119.01	105.537	107.61	107.755	109.265	109.269	109.149	109.653	110.373	110	109.635	114.022	114.416	101.339	102.461	103.225	103.92	103.235	106.057	109.461	107.145	106.688	107.635	111.876
57.6667	3460	13.535	12.012	12.573	14.102	14.7	14.735	15.722	15.373	15.429	36.057	32.069	37.908	115.435	104.002	105.312	107.904	108.708	109.88	106.729	107.551	108.267	108.769	105.633	110.857	119.069	105.808	107.608	108.043	109.449	109.237	109.275	109.878	110.7	110.139	109.749	114.133	114.616	101.476	102.527	103.406	104.061	103.178	106.151	109.806	107.331	106.89	107.814	112.363
58.0042	3480.25	13.614	12.104	12.663	13.953	14.512	14.753	15.794	15.392	15.604	36.159	32.306	38.216	115.639	104.257	105.302	108.008	108.59	109.888	106.82	107.818	107.976	108.694	105.841	111.033	119.029	105.686	107.704	107.839	109.429	109.341	109.512	110.008	110.567	109.996	109.61	113.941	114.478	101.59	102.635	103.365	103.994	103.478	106.08	109.625	107.339	106.794	107.692	112.016
58.3333	3500	13.643	12.149	12.573	14.069	14.529	14.78	15.641	15.386	15.547	36.214	32.406	38.006	115.657	104.578	105.386	108.137	108.782	109.833	107.027	107.576	108.137	108.916	105.767	110.953	119.159	105.698	107.865	108.075	109.384	109.139	109.622	109.822	110.737	110.329	109.739	114.139	114.58	101.533	102.488	103.304	103.763	103.512	105.986	109.725	107.337	106.9	107.837	112.335
58.6708	3520.25	13.647	12.149	12.629	14.076	14.571	14.82	15.769	15.335	15.533	36.273	32.612	38.39	115.694	104.469	105.457	108.169	108.71	109.825	107.047	107.514	108.294	108.918	105.71	111.055	119.314	106.047	107.943	108.263	109.512	109.28	109.584	110.19	110.767	110.312	109.955	114.143	114.812	101.545	102.684	103.494	103.878	103.433	106.225	109.878	107.431	106.971	107.888	112.359
59	3540	13.539	12.125	12.553	13.951	14.539	14.725	15.776	15.402	15.533	36.367	32.524	38.282	115.249	104.19	105.233	108.239	108.741	109.775	107.071	107.561	108.298	108.943	105.361	111.098	119.104	105.708	107.618	108.204	109.52	109.339	109.292	109.894	110.645	110.245	109.657	114.284	114.667	101.322	102.388	103.325	103.898	103.286	106.218	109.592	107.316	106.825	107.618	112.463
59.3333	3560	13.643	12.212	12.624	14.067	14.584	14.8	15.8	15.492	15.661	36.651	32.871	38.339	115.555	104.327	105.435	108.31	108.857	110.004	106.833	107.857	108.437	108.99	105.935	111.408	119.149	105.935	108.196	108.2	109.6	109.431	109.506	110.145	110.759	110.592	109.878	114.408	114.745	101.414	102.467	103.425	104.043	103.4	106.247	109.675	107.533	107.024	107.794	112.247
59.6667	3580	13.688	12.212	12.663	14.027	14.665	14.812	15.904	15.424	15.743	36.827	32.906	38.814	115.876	104.441	105.394	108.545	108.961	109.945	107.224	107.814	108.486	109.161	105.908	111.327	119.463	106.308	108.067	108.324	109.525	109.478	109.567	110.184	110.843	110.704	110.002	114.598	114.735	101.425	102.616	103.394	104.127	103.651	106.212	109.892	107.637	107.078	107.937	112.302
60.0042	3600.25	13.735	12.208	12.596	14.063	14.627	14.82	15.873	15.522	15.657	36.927	32.912	38.814	115.845	104.616	105.596	108.731	109.159	110.404	107.49	108.106	108.69	109.465	105.941	111.645	119.629	106.241	108.173	108.557	109.822	109.506	109.853	110.51	111.182	110.6	110.192	114.78	114.706	101.635	102.692	103.298	104.149	103.606	106.265	109.8	107.627	107.008	107.929	112.408
60.3375	3620.25	13.673	12.241	12.684	14.053	14.586	14.755	15.878	15.49	15.543	36.829	33.1	38.933	115.729	104.441	105.292	108.629	108.759	110.149	107.28	107.792	108.68	109.398	106.133	111.371	119.447	106.133	108.163	108.231	109.669	109.492	109.692	110.535	111.065	110.545	110.104	114.565	114.624	101.669	102.606	103.39	104.02	103.541	106.21	109.718	107.371	106.957	107.806	112.294
60.6708	3640.25	13.663	12.278	12.714	14.11	14.678	14.837	15.898	15.608	15.684	37.237	33.273	39.173	115.884	104.718	105.645	108.878	109.435	110.433	107.539	108.243	108.765	109.653	106.339	111.749	119.486	106.245	108.467	108.576	109.812	109.718	110.127	110.588	111.225	110.912	110.224	114.769	114.81	101.778	102.72	103.629	104.153	103.622	106.353	109.824	107.52	107.098	108.102	112.282
61.0042	3660.25	13.82	12.1	12.524	14.082	14.59	14.741	15.955	15.571	15.696	37.133	33.465	39.169	115.9	104.602	105.706	108.724	109.447	110.373	107.747	108.198	108.802	109.351	106.235	111.706	119.494	106.176	108.263	108.604	109.831	109.649	110.129	110.451	111.341	110.953	110.224	114.635	114.871	101.496	102.557	103.492	104.21	103.359	106.347	109.769	107.71	107.118	107.929	112.488
61.3375	3680.25	13.708	12.243	12.706	14.173	14.704	14.918	15.998	15.604	15.755	37.324	33.671	39.38	115.631	104.122	105.41	108.482	109.169	110.427	107.69	108.176	108.833	109.675	106.198	111.637	119.257	106.245	108.308	108.661	110.096	109.824	110.012	110.686	111.329	110.647	110.22	114.641	114.671	101.453	102.38	103.51	103.92	103.38	106.218	110.004	107.649	107.016	107.761	112.406
61.6667	3700	13.788	12.345	12.663	14.118	14.798	14.894	15.957	15.557	15.731	37.416	33.678	39.363	115.724	104.445	105.625	108.984	109.48	110.261	107.59	108.229	108.749	109.694	106.539	111.931	119.359	106.329	108.275	108.735	109.865	109.663	109.818	110.527	110.971	110.88	110.431	114.718	114.835	101.673	102.624	103.537	104.175	103.647	106.251	109.68	107.561	107.157	107.869	112.48
62	3720	13.739	12.302	12.68	14.053	14.61	14.833	15.978	15.622	15.824	37.553	33.904	39.563	116.078	104.631	105.471	108.827	109.222	110.527	107.867	108.255	108.857	109.567	106.378	111.867	119.445	106.276	108.371	108.676	109.882	109.747	109.99	110.447	111.282	110.984	110.449	114.582	114.655	101.651	102.267	103.573	104.073	103.637	106.498	109.969	107.627	107.047	107.922	112.394
62.3333	3740	13.822	12.331	12.751	14.098	14.724	14.865	15.886	15.567	15.714	37.663	33.914	39.388	115.749	104.614	105.753	109.071	109.482	110.604	107.837	108.292	109.106	109.655	106.567	111.939	119.606	106.233	108.431	108.682	109.888	109.749	110.165	110.496	111.488	110.955	110.376	114.967	114.698	101.698	102.753	103.649	103.973	103.502	106.433	109.998	107.588	107.294	108.043	112.461
62.6708	3760.25	13.89	12.316	12.735	14.067	14.808	14.841	16.012	15.539	15.794	37.743	34.055	39.6	115.957	104.586	105.822	108.796	109.761	110.873	107.796	108.661	109.08	109.798	106.622	112.053	119.402	106.243	108.241	108.647	109.865	109.784	109.829	110.427	111.453	111.01	110.467	114.808	114.718	101.539	102.827	103.743	104.3	103.688	106.296	110.08	107.645	107.316	107.978	112.516
63.0042	3780.25	13.929	12.31	12.806	14.159	14.643	14.939	15.937	15.678	15.712	37.8	34.137	39.614	116.004	104.655	105.608	109.055	109.649	110.773	108.1	108.482	109.169	109.894	106.633	112.076	119.518	106.273	108.294	108.531	109.688	109.704	110.029	110.616	111.478	110.961	110.52	114.647	114.704	101.669	102.647	103.773	104.365	103.755	106.153	110.051	107.714	107.227	107.998	112.484
63.3375	3800.25	13.925	12.367	12.771	14.251	14.831	15.033	15.953	15.657	15.824	37.912	34.386	39.859	115.798	104.378	105.492	109.086	109.524	110.671	108.065	108.488	109.192	109.996	106.547	112.227	119.276	106.202	108.249	108.453	110.143	109.91	110.076	110.545	111.145	110.976	110.345	114.763	114.547	101.584	102.643	103.529	104.165	103.604	106.28	109.765	107.398	107.276	108.031	112.596
63.6708	3820.25	13.902	12.52	12.753	14.102	14.804	15.049	16.012	15.653	15.896	38.102	34.496	39.89	116.041	104.853	105.624	109.041	109.598	110.888	107.725	108.712	109.318	109.984	106.894	112.178	119.276	106.071	108.086	108.447	109.947	110.133	110.057	110.449	111.255	110.851	110.284	114.598	114.688	101.653	102.567	103.586	104.102	103.443	106.414	110.035	107.471	107.131	108.186	112.676
64.0042	3840.25	13.89	12.384	12.765	14.165	14.735	14.935	15.978	15.784	15.855	37.939	34.457	40	116.069	104.629	105.755	109.365	109.614	110.855	108.269	109.053	109.469	109.916	106.761	112.42	119.459	106.359	108.369	108.669	109.806	109.867	110.025	110.329	111.118	110.855	110.453	114.959	114.786	101.482	102.557	103.814	104.443	103.939	106.5	110.063	107.712	107.169	108.039	112.604
64.3375	3860.25	13.935	12.424	12.718	14.108	14.775	15.063	15.951	15.606	15.802	37.976	34.48	40.002	115.859	104.647	105.655	109.073	109.631	110.682	108.004	108.769	109.349	110.027	106.898	112.253	119.502	106.302	108.225	108.504	109.714	110.002	109.963	110.373	111.131	110.88	110.441	114.773	114.665	101.541	102.529	103.751	104.22	103.676	106.275	109.975	107.676	107.059	108.053	112.733
[truncated: 48 more columns]

## Sheet: MTP6_raw
Time (h)	Time (min)	A1	A2	A3	A4	A5	A6	A7	A8	A9	A10	A11	A12	B1	B2	B3	B4	B5	B6	B7	B8	B9	B10	B11	B12	C1	C2	C3	C4	C5	C6	C7	C8	C9	C10	C11	C12	D1	D2	D3	D4	D5	D6	D7	D8	D9	D10	D11	D12
0	0	5.688	6.929	7.686	8.606	9.237	8.461	7.582	6.798	6.331	5.788	5.359	5.765	6.622	7.939	7.98	9.282	9.194	9.347	7.384	6.643	6.463	6.084	5.547	5.731	6.878	7.394	7.51	8.435	8.125	7.951	7.253	7.161	7.173	5.939	5.418	5.498	6.396	7.19	6.775	7.394	7.053	7.371	6.578	7.071	5.824	5.449	5.457	5.459
0.333333	20	5.596	6.994	7.725	8.767	9.412	8.718	7.965	7.208	6.669	6.029	5.5	5.922	6.663	7.931	7.961	9.245	9.386	9.565	7.753	7.18	6.655	6.327	5.725	5.943	6.912	7.475	7.486	8.373	8.106	8.004	7.535	7.461	7.378	6.184	5.616	5.604	6.424	7.196	6.718	7.371	7.165	7.349	6.755	7.3	6.047	5.645	5.527	5.496
0.666667	40	5.645	7.014	7.857	8.959	9.412	9.114	8.573	7.78	7.057	6.322	5.639	5.973	6.867	7.804	7.645	9.024	9.375	9.408	7.82	7.18	6.949	6.565	5.853	5.992	6.922	7.539	7.451	8.535	8.092	8.01	7.665	7.543	7.451	6.408	5.741	5.757	6.51	7.106	6.839	7.533	7.222	7.543	6.845	7.639	6.333	5.835	5.882	5.647
1	60	5.694	7.196	8.118	9.035	9.461	8.955	8.339	7.571	6.935	6.249	5.567	6.037	7.075	8.12	8.047	9.151	9.402	9.339	7.853	7.143	6.888	6.48	5.925	6.167	7.147	7.639	7.549	8.457	8.114	7.994	7.673	7.625	7.594	6.388	5.72	5.816	6.859	7.349	6.931	7.592	7.355	7.602	6.959	7.68	6.422	5.902	5.847	5.771
1.33333	80	5.822	7.418	8.629	9.273	9.525	9.071	8.225	7.514	6.937	6.355	5.625	6.065	7.312	8.657	8.429	9.284	9.359	9.557	7.941	7.231	7.088	6.594	6.049	6.188	7.359	7.855	7.79	8.659	8.233	8.055	7.651	7.665	7.616	6.439	5.882	5.875	7.02	7.657	7.161	7.824	7.457	7.739	7.08	7.731	6.467	6.043	6.114	5.88
1.66667	100	5.753	7.422	8.669	9.349	9.629	9.192	8.49	7.718	7.19	6.473	5.663	6.159	7.371	8.427	8.224	9.294	9.547	9.6	8.21	7.839	7.384	6.798	6.288	6.351	7.361	7.835	7.749	8.618	8.224	8.149	7.863	7.839	7.902	6.69	6.08	5.965	7.229	7.798	7.233	7.976	7.702	7.855	7.449	8.265	6.727	6.265	6.255	6.124
2	120	5.727	7.369	8.475	9.298	9.459	8.961	8.131	7.465	7.02	6.443	5.667	6.069	7.606	8.733	8.412	9.229	9.422	9.79	8.351	7.331	7.32	6.775	6.337	6.355	7.714	8.024	7.849	8.833	8.427	8.275	8.084	7.896	7.869	6.524	6.022	6.073	7.427	8.11	7.543	8.194	7.857	8.037	7.335	8.229	7.176	6.339	6.316	6.257
2.33333	140	5.82	7.461	8.684	9.504	9.659	9.18	8.584	7.947	7.261	6.557	5.845	6.225	7.739	8.843	8.661	9.524	9.696	9.792	8.4	7.771	7.665	7.165	6.7	6.727	7.851	8.292	8.192	8.957	8.473	8.425	8.094	8.053	8.078	6.8	6.28	6.269	7.567	8.218	7.778	8.441	8.08	8.239	7.702	8.631	7.498	6.58	6.512	6.522
2.66667	160	5.863	7.688	9.006	9.765	9.818	9.171	8.329	7.802	7.188	6.573	5.873	6.312	8.061	9.394	9.11	9.847	9.751	9.978	8.478	7.765	7.751	7.28	6.782	7.131	8.171	8.527	8.371	9.094	8.571	8.667	8.163	8.227	8.178	6.973	6.406	6.392	8.027	8.696	8.135	8.669	8.32	8.473	7.827	8.939	7.741	6.68	6.714	6.739
3	180	5.818	7.504	8.812	9.547	9.729	9.304	8.539	7.92	7.369	6.582	5.876	6.249	8.131	9.192	8.947	9.767	9.88	10.182	8.918	8.275	8.11	7.494	6.922	7.153	8.21	8.416	8.335	9.278	8.79	8.773	8.469	8.441	8.459	7.008	6.614	6.425	8.178	8.818	8.216	8.963	8.602	8.688	8.216	9.171	7.973	7.067	6.963	6.984
3.33333	200	5.892	7.594	8.869	9.724	9.849	9.331	8.573	7.98	7.576	6.827	5.945	6.414	8.41	9.62	9.224	10.012	10.19	10.502	9.453	8.52	8.406	7.769	7.188	7.351	8.459	8.633	8.537	9.467	9.096	9.041	8.72	8.722	8.647	7.143	6.763	6.614	8.618	9.09	8.618	9.478	8.922	9.157	8.561	9.443	8.31	7.396	7.318	7.327
3.66667	220	5.873	7.659	9.061	9.943	10.106	9.682	8.967	8.437	7.751	7.022	6.282	6.751	8.792	10.129	9.645	10.3	10.494	11.125	10.527	9.037	9.053	8.192	7.735	7.763	8.875	8.906	8.939	9.849	9.533	9.839	9.284	9.251	9.141	7.61	7.08	7.035	9.069	9.682	9.11	9.733	9.373	9.559	9.039	10.239	8.945	7.771	7.788	7.62
4	240	5.729	7.48	8.82	9.949	10.173	9.812	9.324	8.647	8.024	7.173	6.353	6.741	8.949	10.065	9.604	10.469	11.184	12.165	11.433	10.227	10.061	9.12	8.418	8.076	9.12	9.375	9.075	10.533	10.276	10.624	10.045	9.906	9.824	7.947	7.504	7.3	9.371	9.9	9.418	10.2	10.055	10.641	9.551	11.118	9.565	8.327	8.271	8.014
4.33333	260	5.833	7.69	9.169	10.235	10.375	9.963	9.353	8.686	8.029	7.302	6.42	6.949	9.473	10.529	9.988	10.959	12.147	12.92	12.216	11.52	11.047	10.188	9.51	8.531	9.357	9.902	9.849	11.382	11.096	11.237	11.22	10.786	10.704	8.341	7.986	7.588	10.076	10.58	10.151	11.545	11.337	11.647	10.582	12.369	10.218	8.718	8.688	8.408
4.66667	280	5.788	7.531	9.092	10.045	10.308	9.939	9.351	8.775	8.124	7.375	6.502	6.898	9.829	10.78	10.627	11.937	13.194	13.725	12.735	12.729	12.394	11.871	11.229	9.416	9.763	10.967	10.606	12.188	11.68	11.831	11.729	11.775	11.827	9.243	8.922	7.569	10.68	11.614	12.02	12.596	13.02	13.202	11.984	14.131	11.875	9.431	9.255	8.949
5	300	5.71	7.627	9.108	10.298	10.361	9.939	9.476	8.657	8.153	7.449	6.561	7.018	10.304	11.731	11.639	13.247	13.79	13.902	13.176	13.206	13.361	13.425	12.565	10.549	10.565	11.822	11.653	12.886	12.153	12.202	12.151	12.345	12.58	10.184	9.988	7.859	11.671	13.357	13.576	13.996	13.941	13.916	13.286	15.198	13.637	10.704	9.912	9.582
5.33333	320	5.763	7.79	9.427	10.635	10.792	10.351	9.882	9.253	8.42	7.771	6.81	7.371	11.114	13.127	13.186	14.427	14.212	14.388	13.633	13.614	13.937	14.504	13.633	13.022	11.871	13.218	12.655	13.375	12.576	12.635	12.437	12.72	13.122	11.369	11.294	8.398	12.637	15.735	15.094	14.971	14.882	14.704	14.371	16.461	15.204	13.027	11.639	10.455
5.66667	340	5.596	7.557	8.992	10.259	10.688	10.508	10.251	9.929	8.875	8.145	7.133	7.48	12.461	15.014	14.476	14.89	14.72	14.927	14.112	14.461	14.602	15.084	14.443	15.027	14.314	13.853	13.169	13.806	12.845	12.896	12.906	13.231	13.639	12.386	12.457	9.104	14.425	17.327	16.2	15.918	15.551	15.414	15.047	17.386	16.302	15.4	14.184	11.659
6	360	5.751	7.782	9.527	10.773	11.082	10.733	10.553	9.92	9.21	8.312	7.325	7.816	16.024	15.951	15.214	15.482	15.192	15.565	14.925	15.251	15.108	15.849	14.953	16.041	16.008	14.612	13.765	14.341	13.439	13.596	13.314	13.582	13.971	13.069	13.155	10.188	19.159	18.416	16.975	16.629	16.52	16.175	15.857	18.543	17.175	16.786	16.782	13.72
6.33333	380	5.931	8.075	9.916	10.988	11.122	10.533	10.412	9.637	9.065	8.376	7.471	8.082	17.324	16.459	15.814	16.076	15.827	16.216	15.604	15.922	15.657	16.451	15.441	16.612	16.486	14.998	14.29	14.937	13.763	13.984	13.751	14.133	14.388	13.553	13.694	12.159	21.02	19.147	17.61	17.635	17.427	17.131	16.592	19.649	18.243	17.775	18.531	18.255
6.66667	400	5.673	7.747	9.357	10.933	11.2	10.784	10.851	10.204	9.461	8.763	7.635	8.173	18.094	17.063	16.384	16.761	16.788	17.275	16.694	16.982	16.653	17.247	16.404	17.725	17.155	15.629	14.769	15.486	14.559	14.716	14.4	14.7	15.008	14.096	14.296	14.341	22.122	20.206	18.871	18.861	18.61	18.257	17.62	20.69	19.278	18.865	19.647	20.714
7	420	5.908	8.208	10.131	11.425	11.531	11.102	11.078	10.478	9.788	9.182	8.161	8.696	18.971	17.982	17.384	17.716	18.065	18.333	17.867	17.855	17.81	18.32	17.439	18.567	18.057	16.461	15.635	16.3	15.261	15.461	15.161	15.473	15.675	14.778	14.873	15.351	23.169	21.506	20.204	20.1	20.008	19.482	18.706	21.831	20.496	19.998	20.582	22.2
7.33333	440	5.698	7.843	9.655	11.353	11.361	11.29	11.61	11.243	10.471	9.637	8.604	8.914	20.204	19.027	18.304	18.835	19.122	19.4	19.014	18.914	19.043	19.753	18.784	20.027	19.002	17.167	16.245	17.171	16.059	16.329	16.039	16.502	16.596	15.455	15.655	16.106	24.91	22.925	21.741	21.669	21.414	20.992	19.822	23.31	21.876	21.322	21.608	22.99
7.66667	460	5.776	8.133	10.124	11.692	11.831	11.639	12.484	11.759	10.802	10.204	9.104	9.353	20.969	19.976	19.549	20.043	20.249	20.633	20.047	20.614	20.025	20.592	19.561	21.135	19.859	17.882	17.339	17.88	16.892	17.375	16.871	17.233	17.418	16.035	16.218	16.782	26.592	24.604	23.296	23.359	22.998	22.51	21.159	24.869	23.545	22.733	22.984	24.471
8	480	5.798	8.192	10.273	11.927	12.2	12.075	13.945	12.565	11.625	11.194	10.116	10.527	22.555	21.331	20.892	21.522	21.682	22.065	21.404	20.988	21.059	21.739	21.033	22.412	21.141	18.971	18.359	19.112	17.937	18.188	17.775	18.149	18.192	17.149	17.08	17.631	28.837	26.488	25.129	25.133	24.914	24.257	22.724	26.661	25.233	24.312	24.457	26.092
8.33333	500	5.847	8.406	10.559	12.202	12.355	12.349	15.529	14.447	12.578	12.341	11.824	11.59	23.88	22.506	22.555	22.863	22.886	23.159	22.543	21.922	22.255	23.11	22.237	23.543	22.288	19.949	19.557	20.135	18.924	19.233	18.814	19.004	19.19	18.025	17.99	18.537	31.202	28.416	27.149	27.01	26.831	26.182	24.588	28.563	27.037	26.237	26.339	28.141
8.66667	520	5.708	8.176	10.145	12.292	12.635	12.643	16.955	16.431	14.845	15.455	13.753	13.806	25.594	23.924	23.616	23.988	24.265	24.551	23.833	23.051	23.518	24.265	23.241	24.839	23.48	21.171	20.447	21.339	19.971	20.355	19.994	20.265	20.445	19.286	19.055	19.496	33.237	30.81	29.535	29.457	29.243	28.52	26.624	31.173	29.359	28.373	28.378	30.255
9	540	5.706	8.153	10.265	12.657	12.898	13.576	17.639	18.047	17.543	17.955	15.561	15.58	26.931	25.082	24.9	25.392	25.759	25.749	25.186	24.431	24.675	25.447	24.408	26.09	24.637	22.222	21.484	22.38	21.222	21.641	20.859	21.243	21.198	20.051	19.935	20.524	36.112	33.084	31.829	31.649	31.5	30.818	28.669	32.939	31.443	30.551	30.382	32.663
9.33333	560	5.702	8.365	10.745	13.439	13.698	15.422	17.612	18.551	18.535	18.808	16.559	16.81	28.639	26.433	26.178	26.663	26.775	27.1	26.096	24.425	25.641	26.604	25.604	27.171	25.967	23.214	22.6	23.253	22.176	22.522	21.886	22.127	22.204	21.025	20.782	21.451	38.69	35.318	34.341	34.284	34.035	33.08	30.814	35.614	34.084	32.869	32.588	35.12
9.66667	580	5.724	8.292	10.708	14.108	15.082	16.837	17.5	18.359	18.424	19.157	17.325	17.58	29.965	27.716	27.486	28.016	28.21	28.278	27.524	25.075	27.098	28.037	27.153	29.155	27.469	24.333	23.747	24.339	23.453	23.845	22.975	23.316	23.38	21.869	21.839	22.686	41.794	38.241	37.053	37.008	36.647	35.78	33.375	38.325	36.624	35.461	35.051	37.492
10	600	5.635	8.398	10.961	15.169	17.086	17.878	17.843	18.451	18.792	19.388	17.29	18.063	31.531	29.143	29.051	29.62	29.925	29.718	28.81	25.153	28.476	29.384	28.106	29.725	28.745	25.594	25.108	25.737	24.508	24.896	24.1	24.416	24.496	23.125	23.035	23.712	45.249	41.275	40.402	40.347	39.924	39.125	36.059	41.751	39.927	38.657	37.933	40.596
10.3333	620	5.612	8.516	11.098	17.31	18.155	17.992	18.441	19.261	19.225	19.961	17.91	18.549	33.004	30.431	30.276	30.341	30.612	30.524	29.555	25.749	29.312	30.247	28.792	29.702	30.022	26.837	26.149	26.804	25.602	26.012	25.339	25.631	25.641	24.194	24.086	25.104	48.753	44.527	43.588	43.69	43.127	42.122	38.982	44.896	43.024	41.884	40.982	43.614
10.6667	640	5.598	8.331	10.849	18.88	18.494	17.647	19.294	20.139	20.01	20.986	18.453	19.441	33.943	31.424	30.975	31.812	32.076	31.737	30.875	25.871	30.778	31.408	30.331	31.465	31.212	28.112	27.58	28.267	27.116	27.524	26.714	27.067	26.8	25.284	25.096	26.184	52.704	48.139	47.114	47.288	46.547	45.678	42.057	48.11	46.165	45.098	44.371	47.294
11	660	5.61	8.535	11.265	18.673	18.271	17.896	19.939	20.675	20.625	21.492	19.196	20.261	34.016	32.114	31.61	32.386	29.573	29.545	28.853	26.673	28.09	31.318	28.1	29.794	32.792	29.269	28.024	29.39	28.353	28.786	27.794	28.051	27.792	26.251	26.18	27.335	56.731	51.739	51.084	51.051	50.357	49.431	45.786	51.992	49.853	48.653	47.973	50.861
11.3333	680	5.596	8.573	11.396	19.133	18.81	18.392	20.857	21.496	21.461	22.539	19.837	21.329	35.014	33.237	30.557	30.986	31.665	31.098	30.214	28.304	29.576	31.382	29.59	31.39	33.737	29.627	29.243	29.837	29.192	30.029	29.196	29.512	29.139	27.827	27.512	28.514	61.5	55.661	54.873	55.006	54.125	53.363	49.533	55.755	53.612	52.424	51.653	54.896
11.6667	700	5.561	8.727	11.667	19.678	19.198	18.802	21.598	22.129	22.222	23.331	20.557	22.324	36.843	33.971	32.357	32.888	33.073	33.035	32.165	30.184	31.498	33.375	31.476	33.431	34.761	30.094	30.169	30.616	29.916	29.982	29.004	29.643	29.92	28.39	28.273	29.516	66.788	60.241	59.118	59.386	58.282	57.463	53.278	60.022	57.806	56.588	55.375	59.482
12	720	5.578	8.69	11.833	20.308	20.037	19.671	22.555	23.194	23.22	24.427	21.502	23.088	38.71	35.941	34.343	34.861	35.129	35.122	34.188	32.318	33.471	34.898	33.504	35.386	36.194	30.975	30.645	31.32	31.284	31.439	30.614	31.041	30.596	29.735	29.18	30.898	72.343	65.502	64.49	64.539	63.488	62.533	57.402	65.278	62.68	61.304	59.908	64.433
12.3333	740	5.678	8.788	12.412	21.276	20.876	20.545	23.737	24.325	24.282	25.873	22.571	24.565	40.857	37.775	36.22	36.751	36.992	37.371	36.165	34.267	35.42	37.127	35.414	37.408	37.824	32.804	31.639	32.333	31.614	31.533	31.078	31.533	31.369	30.565	30.18	31.937	77.286	70.269	69.384	69.435	68.553	67.165	62.078	70.218	67.555	66.151	64.955	69.688
12.6667	760	5.629	9.053	13.349	21.982	21.52	21.071	24.69	25.355	25.369	26.853	23.673	25.843	42.525	40.096	38.496	39.227	39.425	39.651	38.608	37.116	37.745	39.369	37.892	39.565	39.561	34.645	33.59	34.278	32.553	32.794	31.382	31.967	31.437	31.376	30.569	33.196	81.616	74.459	73.543	74.155	73.124	72.037	67.253	74.692	72.084	70.592	69.524	74.169
13	780	5.673	9.343	13.79	22.402	21.994	21.533	25.49	26.076	26.075	27.694	24.327	27.204	44.876	41.649	40.302	41.249	41.463	41.661	40.896	39.418	39.751	41.408	39.916	41.641	41.498	36.224	35.284	35.871	34.175	34.382	33.024	33.247	32.81	31.814	31.32	34.306	84.902	77.41	76.843	77.3	76.816	75.622	71.667	78.584	75.59	74.4	73.571	77.916
13.3333	800	5.555	9.429	15.549	23.214	22.886	22.4	26.867	27.349	27.196	29.149	25.82	28.665	46.92	43.918	42.584	43.469	43.943	44.039	43.106	42.065	42.09	43.869	42.286	43.953	43.09	38.041	37.075	37.796	36.202	36.173	34.955	35.157	34.714	33.633	33.265	35.908	87.404	80.324	79.8	80.673	80.098	79.212	75.641	81.829	78.892	77.443	77.112	81.059
13.6667	820	5.557	9.496	17.137	24.122	23.698	23.353	27.955	28.494	28.576	30.529	26.873	29.724	49.141	45.933	44.761	45.898	46.327	46.461	45.425	44.696	44.357	46.11	44.237	45.924	45.153	40.01	37.922	39.492	37.671	38.169	36.892	37.214	36.529	35.386	34.929	37.606	89.176	82.08	81.869	82.622	82.249	81.294	78.722	84.135	80.914	79.394	79.52	83.359
14	840	5.541	9.427	18.402	25.116	24.945	24.386	29.461	29.884	29.978	32.198	27.527	30.18	50.853	48.286	47.216	48.361	48.606	49.022	47.816	47.057	46.576	48.555	46.618	48.149	47.527	42.122	41.292	42.006	40.21	40.58	38.912	39.204	38.545	37.076	36.673	39.52	90.818	83.531	83.169	84.031	84.037	83.298	81.175	85.72	82.659	81.147	81.353	85.029
14.3333	860	5.553	9.508	18.376	26.082	25.72	25.212	30.849	31.384	31.475	33.976	28.467	31.724	54.108	50.688	49.547	50.943	51.169	51.5	50.214	49.769	48.971	50.422	49.241	50.776	49.486	43.908	43.178	43.625	42.425	42.529	40.882	41.025	40.467	39.282	38.451	41.222	91.808	84.549	84.245	85.21	85.271	84.41	83	86.794	83.467	82.333	82.735	85.955
14.6667	880	5.62	10.127	18.524	26.618	26.496	25.7	32.124	32.61	32.451	34.588	29.625	33.555	54.89	53.022	51.81	53.139	53.598	53.843	52.682	52.265	51.408	53.261	51.563	53.033	51.029	46.625	45.429	46.069	44.498	44.722	43.525	43.531	42.937	41.371	41.002	43.239	92.616	85.3	85.125	85.857	85.847	85.349	83.99	87.486	84.484	83.049	83.676	86.571
15	900	5.627	10.382	18.967	27.994	27.706	26.745	33.873	34.398	34.382	36.263	31.318	35.369	57.104	54.737	54.267	55.908	55.967	56.357	55.08	54.671	53.802	55.198	53.835	55.42	53.002	47.765	47.475	48.163	46.504	46.547	45.506	45.563	44.796	43.38	42.665	45.32	92.965	85.914	85.945	86.347	86.463	85.849	84.573	88.065	84.9	83.402	84.243	87.092
15.3333	920	5.69	10.682	19.473	29.084	28.698	27.943	35.612	36.171	35.333	38.116	32.88	37.273	59.412	57.392	57.063	58.455	58.506	59.031	57.808	57.314	56.282	57.455	56.533	57.712	55.412	50.771	49.667	50.439	48.863	49.035	47.843	47.555	47.204	45.573	45.141	46.906	93.294	85.737	85.918	86.822	86.984	86.467	85.392	88.555	84.927	83.747	84.59	87.445
15.6667	940	5.653	10.675	19.831	30.259	29.804	29.051	36.869	37.433	37.045	40.022	34.525	39.422	61.545	59.531	59.045	60.561	60.755	61.194	59.976	59.257	58.496	59.639	58.698	59.886	56.635	51.622	52.141	52.786	51.188	51.094	49.512	49.841	49.155	47.49	46.99	48.578	93.557	86.237	86.114	87.045	87.039	86.755	85.59	88.81	85.42	84.037	84.818	87.753
16	960	5.545	11.112	20.251	31.141	30.775	29.976	38.394	38.914	38.667	41.484	36.525	41.365	64.535	61.776	61.651	63.235	63.575	63.959	62.425	61.976	60.996	62.778	61.451	62.543	58.773	54.906	54.28	54.931	53.58	53.827	52.202	52.557	51.494	49.978	49.504	49.912	93.839	86.571	86.551	87.312	87.286	86.802	85.908	89.039	85.904	84.186	85.053	87.865
16.3333	980	5.618	11.455	20.688	32.169	32.037	31	40.169	40.633	40.388	43.953	38.373	43.318	67.125	63.451	63.8	65.469	65.294	65.857	64.29	64.004	63.094	64.255	63.184	64.871	61.467	57.355	56.763	57.386	55.71	56.047	54.165	54.722	53.902	51.988	51.229	51.351	93.99	87.094	86.747	87.545	87.612	87.269	86.196	89.198	86.102	84.72	85.31	88.1
16.6667	1000	5.647	12.143	21.263	33.698	33.431	32.641	42.192	42.614	42.247	45.292	40.169	45.786	69.586	66.535	65.947	67.6	67.984	68.573	66.559	66.288	65.443	66.812	65.349	66.678	64.025	59.378	58.978	59.635	57.978	58.231	56.624	56.8	55.869	54.482	53.745	53.588	94.141	87.078	87.108	87.716	87.869	87.559	86.42	89.622	86.106	84.678	85.631	88.482
17	1020	5.582	13.327	21.437	35.143	34.902	33.837	43.837	44.302	44.329	47.224	42.186	47.771	71.867	68.418	68.396	70.018	69.969	70.533	68.612	68.506	67.886	69.28	67.62	68.814	67.002	61.688	60.833	61.422	60.325	60.761	58.827	59.359	58.098	56.488	56.047	55.859	94.61	87.455	87.324	88.098	88.106	87.588	86.527	89.576	86.445	84.955	85.853	88.631
17.3333	1040	5.575	14.625	21.741	36.12	35.765	34.849	45.827	45.91	46.045	49.5	44.4	49.714	74.073	70.231	70.676	72.008	72.161	72.429	70.692	70.278	69.8	70.786	69.473	70.98	68.998	64.163	63.767	64.52	62.714	63.147	61.561	61.82	59.518	58.147	58.206	58.294	94.767	87.72	87.449	88.447	88.459	87.955	86.847	90.008	86.859	85.449	86.239	88.963
17.6667	1060	5.682	16.314	22.422	37.739	37.361	36.594	47.727	48.01	48.329	51.659	46.339	51.925	76.498	73.141	72.786	74.208	74.355	74.869	72.4	72.761	71.612	73.029	71.708	72.967	71.222	66.349	66.394	67.037	65.133	65.635	63.9	64.143	62.022	59.953	60.412	60.378	95.363	87.945	87.678	88.688	88.982	88.447	87.288	90.271	87.149	85.655	86.518	89.269
18	1080	5.661	17.28	22.592	39.202	38.722	37.786	49.418	49.675	49.908	53.522	48.145	53.776	78.427	74.527	74.571	76.035	75.969	76.147	73.235	73.906	73.522	74.914	73.12	74.565	73.184	68.167	68.345	69.124	67.296	68.006	66.039	66.004	64.718	62.247	62.663	62.629	95.724	88.324	88.082	89.212	89.131	88.486	87.508	90.739	87.604	85.996	86.994	89.898
18.3333	1100	5.633	17.024	22.971	40.329	40.318	39.402	51.535	51.608	52.047	55.88	50.286	56.19	80.155	75.68	76.365	77.471	77.69	77.398	75.008	75.488	74.878	76.176	74.747	75.698	76.386	71.12	70.42	71.257	69.839	70.396	68.645	67.886	67.598	65.618	65.435	65.259	96.037	88.655	88.559	89.547	89.643	88.798	88.108	91.29	87.894	86.398	87.2	90.139
18.6667	1120	5.512	17.42	23.439	41.982	41.794	40.9	53.502	53.659	53.614	57.971	52.161	58.416	81.806	77.192	77.635	78.992	78.869	78.445	76.157	76.857	75.992	76.882	75.631	77.151	78.239	73.12	73.059	73.702	71.692	72.794	70.02	70.459	69.043	67.112	67.396	68.38	96.218	88.835	88.792	89.751	89.888	89.222	88.376	91.555	88.027	86.737	87.412	90.184
19	1140	5.763	17.945	24.282	43.706	43.749	42.818	55.457	55.482	55.206	60.345	54.437	60.506	83.145	79.533	79.192	79.735	80.741	79.68	77.612	78.231	77.294	78.224	77.029	78.643	80.341	75.58	75.551	76.318	74.265	74.641	71.969	71.563	71.533	69.206	69.429	70.076	96.761	89.433	89.388	90.139	90.398	89.72	88.831	91.896	88.624	87.045	87.729	90.837
19.3333	1160	5.757	18.316	24.478	45.143	44.925	43.816	57.216	57.027	57.045	62.263	56.098	62.382	84.184	80.114	80.225	81.28	80.914	80.341	78.261	78.835	78.408	79.635	77.704	79.271	81.973	76.62	77.308	78.255	75.888	76.769	74.114	73.818	74.076	71.696	71.882	71.625	97.041	89.637	89.339	90.535	90.663	90.022	88.959	92.337	88.939	87.573	88.151	91.22
19.6667	1180	5.757	18.741	25.451	46.563	46.6	45.845	59.167	59.01	58.892	64.598	58.267	64.484	85.706	81.178	81.349	82.245	82.147	81.484	79.182	80.01	79.465	80.747	78.755	80.002	84.359	78.725	78.857	79.796	78.298	78.778	76.425	75.629	76.304	74.467	74.418	74.247	97.298	89.847	89.584	90.824	90.914	90.439	89.398	92.727	89.167	87.857	88.633	91.594
20	1200	5.584	18.969	25.635	48.78	48.241	47.135	61.082	61.006	61.108	66.735	60.5	66.688	86.976	81.931	82.245	83.586	83.018	82.506	80.149	81.069	80.386	81.504	79.841	80.965	86.759	80.935	81.249	81.92	80.059	80.045	78.843	77.667	77.745	75.771	76.106	77.214	97.596	90.237	90.153	91.212	91.308	90.81	89.916	92.984	89.565	88.363	89.02	92.069
20.3333	1220	5.543	18.906	26.345	49.551	49.79	48.498	63.006	62.81	62.727	68.878	62.378	68.759	87.335	82.91	82.984	84.206	83.524	83.416	80.916	81.698	80.984	81.843	80.41	81.849	88.024	82.439	82.657	83.741	81.061	82.008	80.52	79.631	79.398	77.406	77.445	78.504	97.651	90.296	90.016	91.331	91.233	90.945	89.939	93.282	89.757	88.422	89.163	92.31
20.6667	1240	5.594	19.269	26.69	51.198	51.52	49.99	64.806	64.982	64.682	71.067	64.435	70.771	88.057	84.018	83.998	85.02	84.712	84.324	81.676	82.759	81.716	82.641	81.163	82.58	89.104	84.016	84.449	85.698	82.567	83.631	82.061	81.118	81.873	80.155	79.978	80.437	98.182	90.473	90.32	91.751	91.843	91.48	90.463	93.59	90.269	88.678	89.567	92.604
21	1260	5.541	19.275	27.5	52.953	52.947	51.898	66.841	66.696	66.516	73.118	66.582	72.878	88.818	85.008	84.473	85.641	85.186	84.767	82.376	83.261	82.451	83.247	81.529	83.42	90.186	84.625	85.545	86.376	83.963	84.275	83.625	82.618	83.659	81.655	81.773	82.127	98.447	90.824	90.688	92.149	92.053	91.547	90.631	93.89	90.38	88.98	89.798	92.892
21.3333	1280	5.702	19.427	28.178	54.335	54.5	53.376	68.725	68.794	68.58	75.422	68.659	74.922	89.731	85.527	85.304	86.527	86.029	85.604	82.884	84.137	83.337	84.316	82.445	84.202	91.861	85.808	86.212	87.255	84.933	85.394	84.202	83.796	84.467	82.365	83.133	84.118	98.627	91.28	90.867	92.437	92.298	91.853	91.078	94.329	90.843	89.506	90.225	93.433
21.6667	1300	5.596	19.137	28.716	56.108	56.239	54.965	70.894	70.6	70.402	77.284	70.712	77.084	90.3	85.645	85.965	86.986	86.32	86.235	83.675	84.598	83.737	84.847	82.782	84.3	92.922	86.551	87.222	88.182	86.225	86.716	85.578	84.969	85.118	83.324	83.786	84.831	98.955	91.496	91.396	92.804	92.839	92.214	91.531	94.722	91.284	89.812	90.527	93.61
22	1320	5.586	19.492	29.406	57.449	57.547	56.439	72.786	72.443	72.612	79.478	72.739	79.141	91.38	86.267	86.508	87.82	87.416	87.212	84.273	85.298	84.28	85.184	82.971	85.082	93.771	87.622	88.184	89.01	87.396	87.825	86.641	86.239	86.459	84.908	84.688	86.106	99.204	91.794	91.647	93.237	93.202	92.651	91.833	94.814	91.524	90.131	90.975	93.988
22.3333	1340	5.618	19.524	29.996	58.888	58.896	57.88	74.484	74.414	74.259	81.449	74.784	81.084	91.806	86.7	87.378	88.382	87.476	87.425	84.837	85.912	85.09	86.475	83.718	85.537	94.641	88.751	89.276	90.404	88.157	88.547	87.275	87.02	87.937	86.743	86.182	87.235	99.549	92.298	91.929	93.582	93.622	92.894	92.439	95.463	91.904	90.7	91.335	94.457
22.6667	1360	5.543	19.876	30.618	60.322	60.496	59.661	76.431	76.169	75.894	83.431	76.555	83.075	92.224	86.743	87.847	89.065	88.235	87.692	85.322	86.196	85.68	86.594	83.692	85.676	95.022	89.267	89.727	91.155	89.029	89.455	88.42	87.986	89.155	87.269	87.218	88.424	99.961	92.447	92.429	93.873	93.859	93.302	92.52	95.865	92.188	90.878	91.653	94.867
23	1380	5.731	20.063	31.396	61.555	61.757	60.914	78.314	77.951	77.759	85.531	78.802	84.922	92.808	87.427	88.261	89.453	88.604	88.416	85.551	86.535	86.19	87.396	84.294	86.694	95.727	89.8	90.359	92.318	89.667	89.998	88.973	88.592	89.631	87.298	88.461	89.369	100.52	92.647	92.488	94.127	94.288	93.537	93.053	95.845	92.52	91.278	92.149	95.222
23.3333	1400	5.692	20.51	32.057	63.098	63.363	62.369	79.988	79.847	79.516	87.331	80.578	86.69	93.361	87.876	88.482	89.671	89.347	88.639	86.131	87.004	86.447	87.686	84.773	87.012	96.649	90.276	90.863	92.782	90.296	90.918	89.673	89.325	89.978	87.778	89.11	89.878	100.68	92.863	92.616	94.398	94.537	93.951	93.382	96.396	92.702	91.5	92.163	95.492
23.6667	1420	5.631	20.898	32.767	64.553	64.641	63.92	81.633	81.051	81.129	88.667	82.225	88.212	93.537	88.194	88.873	90.18	89.396	89.108	86.333	87.227	86.678	87.953	84.969	87.135	97.167	90.755	90.951	93.522	91.218	91.667	90.392	90.012	90.088	88.586	89.598	90.275	100.953	93.192	93.302	94.651	94.58	94.269	93.514	96.847	93.067	91.733	92.651	95.782
24	1440	5.631	21.463	33.639	65.88	66.31	65.567	83.353	82.902	82.851	90.069	83.914	89.376	94.045	88.467	88.906	90.345	89.678	89.543	86.567	87.578	87.18	88.112	85.341	87.5	97.71	91.273	91.404	93.79	91.488	92.122	90.908	90.569	90.584	89.402	89.592	90.959	101.327	93.561	93.475	95.014	95.124	94.51	93.759	97.059	93.557	92.092	92.816	95.978
24.3333	1460	5.753	21.692	34.222	67.051	67.504	66.3	84.645	84.339	84.12	90.947	85.112	90.492	94.035	88.735	89.475	90.767	90.006	89.692	86.837	87.767	87.225	88.265	85.724	87.588	98.276	91.412	91.447	93.649	92.051	92.631	91.118	90.843	91.075	90.067	89.512	91.343	101.273	93.516	93.627	95.112	94.849	94.675	94.088	97.086	93.659	92.286	93.145	96.133
24.6667	1480	5.571	22.096	35.118	68.471	68.849	67.825	86.124	85.737	85.524	92.396	86.231	91.555	94.463	89.188	89.553	90.875	90.325	89.843	87.127	87.878	87.682	88.451	85.888	87.759	98.682	90.875	91.724	93.757	92.582	92.81	91.745	91.396	91.633	90.812	89.849	92.049	101.455	93.716	93.671	95.437	95.292	94.776	94.165	97.163	93.582	92.398	93.416	96.635
25	1500	5.733	22.686	35.792	69.78	70.247	69.306	87.514	86.955	86.802	93.202	87.414	92.547	94.773	89.439	89.798	90.924	90.514	89.998	87.188	88.263	87.747	88.527	85.829	88.098	98.98	90.892	91.959	93.792	92.755	93.351	92.037	91.712	92	91.418	89.847	92.747	101.686	93.918	93.78	95.559	95.676	94.894	94.394	97.418	93.812	92.484	93.392	96.537
25.3333	1520	5.696	23.145	36.388	71.231	71.467	70.527	88.776	88.218	88.294	94.157	88.259	93.394	95.029	89.845	89.663	90.78	91.063	90.667	87.971	88.608	88.165	88.694	86.188	88.333	99.543	90.867	91.99	93.653	93.341	93.882	92.555	92.445	92.175	92.059	90.184	93.161	101.643	93.922	94.147	95.657	95.902	95.22	94.518	97.906	94.098	92.575	93.733	96.614
25.6667	1540	5.653	23.6	37.01	72.473	73.078	72.041	90.31	89.345	89.371	94.833	89.506	94.239	95.533	90.722	89.953	91.378	91.204	90.782	87.835	88.753	88.616	89.133	86.624	88.943	99.943	91.52	92.565	93.841	93.561	93.965	92.686	92.569	92.727	92.471	90.425	93.71	101.937	94.282	94.198	95.794	95.941	95.239	94.839	97.951	94.294	92.949	94.075	97.112
26	1560	5.696	24.057	37.727	73.788	74.155	73.237	91.231	90.443	90.355	95.584	90.173	94.702	95.518	90.286	90.392	91.261	91.253	90.753	87.92	88.771	88.553	88.822	86.575	88.763	100.024	91.896	92.592	93.71	93.761	94.343	93.01	92.751	93.012	92.867	90.569	93.516	102.149	94.394	94.308	95.947	96.008	95.38	95.076	98.241	94.549	93.2	94.078	97.137
26.3333	1580	5.571	24.714	38.545	75.204	75.571	74.498	92.425	91.465	91.443	96.557	90.802	95.582	96.055	90.202	90.522	91.316	91.627	91.414	88.643	89.547	88.688	89.098	87	89.147	100.41	91.808	93.19	93.996	94.512	95.055	93.829	93.461	93.147	93.165	90.58	94.076	102.396	94.441	94.363	96.2	96.214	95.82	95.133	98.345	94.755	93.463	94.445	97.435
26.6667	1600	5.582	25.192	39.157	76.298	76.718	75.824	93.22	92.239	92.229	97.018	91.512	96.216	95.986	90.312	90.855	91.196	91.733	91.116	88.282	89.575	88.627	89.32	86.963	89.106	100.484	92	93.463	94.461	94.422	94.841	93.673	93.622	93.063	93.386	90.847	94.325	102.539	94.882	94.6	96.341	96.586	96.004	95.48	98.4	94.935	93.559	94.345	97.461
27	1620	5.624	25.863	39.704	77.635	78.006	76.886	94.175	93.194	93.173	97.569	92.243	96.792	96	90.759	90.976	91.404	91.91	91.371	88.367	89.447	88.692	89.62	87.139	89.469	101.041	92.631	93.714	94.827	94.692	95.116	93.888	93.814	93.657	93.588	91.359	94.71	102.676	94.792	94.675	96.414	96.524	95.967	95.576	98.441	95.027	93.688	94.696	97.725
27.3333	1640	5.598	26.461	40.233	78.639	79.033	78.171	94.794	94.002	93.804	97.792	92.52	97.231	96.01	90.731	90.396	91.086	91.708	91.327	88.353	89.447	88.92	89.429	87.229	89.133	100.573	92.363	93.739	94.82	94.804	95.486	94	93.849	94.151	93.465	91.761	94.88	102.671	95.022	94.727	96.665	96.72	96.265	95.757	98.771	95.043	93.684	94.635	97.935
27.6667	1660	5.502	26.957	41.067	79.724	80.304	79.186	95.682	94.833	94.473	98.433	92.986	97.733	96.316	90.337	91.01	91.129	91.969	91.49	88.602	89.684	89.32	89.457	87.292	89.343	101.065	92.867	94.18	95.147	95.247	95.802	94.418	94.331	93.908	94.08	91.896	95.308	102.865	95.022	94.984	96.614	96.806	96.165	95.792	98.896	95.408	93.867	94.629	97.951
28	1680	5.514	27.68	41.886	81.014	81.275	80.155	96.382	95.49	95.171	98.778	93.612	98.365	96.369	90.263	91.061	91.186	91.629	91.382	88.61	89.504	89.145	89.412	87.18	89.373	101.131	93.122	94.422	95.661	95.414	95.91	94.651	94.424	93.873	94.361	92.049	95.461	103.186	95.4	95.147	96.886	97.065	96.384	96.004	99.141	95.424	94.065	94.971	98.261
28.3333	1700	5.62	28.09	42.212	81.647	82.178	81.196	96.696	95.737	95.578	99.267	93.737	98.467	96.153	90.629	90.796	91.037	92.067	91.294	88.41	89.659	89.025	89.437	87.035	89.353	101.406	93.159	94.331	95.629	95.408	95.763	94.68	94.498	94.606	93.737	92.31	95.463	103.255	95.516	95.196	96.951	96.92	96.496	95.986	99.104	95.469	94.131	95.106	98.253
28.6667	1720	5.514	28.8	43.149	82.953	83.506	82.361	97.245	96.563	96.382	99.761	94.141	98.898	96.557	90.394	91.22	91.408	92.188	91.851	88.922	89.675	89.402	89.716	87.549	89.541	101.822	93.506	94.778	96.141	95.727	96.329	95.292	94.947	94.216	94.949	92.367	95.951	103.473	95.541	95.463	97.135	97.398	96.839	96.353	99.233	95.682	94.304	95.28	98.555
29	1740	5.553	29.412	43.724	83.718	84.206	83.316	98.108	97.065	96.986	100.122	94.739	99.414	96.375	90.653	91.357	91.575	92.222	91.68	88.739	89.763	89.492	89.765	87.684	89.635	101.745	93.863	95.175	96.324	96.198	96.529	95.496	95.204	94.945	94.5	93.027	96.345	103.806	95.696	95.831	97.447	97.631	96.994	96.718	99.543	96.024	94.629	95.555	98.839
29.3333	1760	5.669	30.086	44.31	84.947	85.284	84.394	98.606	97.437	97.524	100.52	95.208	99.761	96.733	90.708	91.398	91.849	92.447	91.876	89.069	90.047	89.588	90.022	87.712	89.904	101.98	93.91	95.18	96.569	96.312	96.763	95.525	95.486	95.222	95.041	93.49	96.629	103.894	95.873	95.933	97.68	97.775	97.084	96.775	99.794	96.088	94.875	95.861	98.986
29.6667	1780	5.537	30.849	45.031	85.498	85.873	85.025	98.782	97.92	97.729	100.629	95.361	99.976	96.567	90.471	91.341	91.712	92.371	91.949	89.039	90.141	89.288	89.959	87.737	89.575	101.8	93.775	95.161	96.541	96.504	97.022	95.645	95.484	94.857	95.471	93.067	96.516	103.861	95.855	95.933	97.735	97.704	97.41	96.661	99.835	96.065	94.775	95.688	98.871
30	1800	5.602	31.296	45.488	86.612	87.014	86.173	99.48	98.476	98.451	100.969	95.708	100.192	96.841	91.01	91.539	91.994	92.476	92.255	89.276	90.057	89.578	90.102	88.039	90.039	102.373	94.073	95.184	96.841	96.594	96.984	95.767	95.725	95.137	95.276	93.249	96.816	104.033	96.165	96.188	98.014	97.835	97.218	96.955	100.063	96.406	94.965	95.925	99.194
30.3333	1820	5.727	31.78	45.735	87.094	87.643	86.569	99.59	98.692	98.567	101.216	95.886	100.545	96.702	90.657	91.251	91.606	92.486	92.08	89.137	90.145	89.529	90.316	87.606	89.818	102.047	93.927	95.231	96.504	96.549	97.127	95.712	95.663	95.069	94.984	93.088	96.769	104.029	96.157	96.055	97.916	97.702	97.32	97.043	99.947	96.476	95.09	95.931	99.031
30.6667	1840	5.706	32.665	46.61	88.12	88.629	87.661	100.225	99.224	98.998	101.504	96.482	100.851	96.937	90.816	91.549	92.065	92.753	92.118	89.273	90.545	89.592	90.241	87.855	90.196	102.425	94.147	95.496	96.743	96.663	97.276	95.882	95.794	95.353	95.222	93.378	97.347	104.298	96.392	96.247	98.218	98.125	97.522	97.133	100.341	96.633	95.465	96.255	99.488
31	1860	5.576	33.496	47.19	88.833	89.463	88.624	100.706	99.445	99.292	101.957	96.516	100.937	97.165	90.682	91.773	92.316	93.031	92.547	89.702	90.531	90.073	90.508	88.186	90.28	102.608	94.494	95.469	96.837	97.178	97.425	96.349	96.171	95.704	95.804	93.524	97.331	104.337	96.445	96.237	98.184	98.416	97.731	97.502	100.38	96.949	95.449	96.269	99.541
31.3333	1880	5.573	33.91	47.78	89.749	89.988	89.282	100.724	99.763	99.635	102.055	96.99	101.249	97.143	90.784	91.655	92.394	92.598	92.184	89.343	90.306	89.878	90.171	88.102	90.116	102.545	94.327	95.663	96.943	96.727	97.42	96.2	95.918	95.404	95.8	93.639	97.145	104.484	96.675	96.441	98.269	98.257	97.722	97.506	100.559	96.969	95.633	96.627	99.796
31.6667	1900	5.559	34.625	48.267	90.373	90.708	89.667	101.11	100	100.069	102.327	96.847	101.369	97.078	91.22	91.822	92.435	92.79	92.41	89.565	90.686	89.927	90.516	88.418	90.173	102.633	94.369	95.618	96.924	96.786	97.194	96.192	96.002	95.671	94.998	93.947	97.498	104.639	96.741	96.424	98.39	98.461	97.984	97.602	100.696	96.878	95.541	96.639	99.875
32	1920	5.665	35.18	48.692	90.722	91.025	90.422	101.263	100.137	100.004	102.424	97.151	101.743	97.055	90.925	91.751	92.457	92.761	92.263	89.476	90.543	89.663	90.273	88.329	90.265	102.159	94.192	95.347	96.875	96.778	97.357	96.229	95.898	95.347	95.792	93.351	97.339	104.631	96.759	96.657	98.5	98.396	98.053	97.473	100.516	97.002	95.694	96.639	99.741
32.3333	1940	5.502	35.751	49.331	91.316	92.029	90.876	101.61	100.469	100.182	102.578	97.339	101.606	97.153	90.963	91.92	92.327	92.912	92.545	89.492	90.631	90.198	90.431	88.324	90.194	102.353	94.357	95.798	97.137	96.933	97.51	96.257	96.155	95.78	95.369	93.737	97.478	104.749	96.782	96.727	98.653	98.457	98.025	97.855	100.751	97.004	95.71	96.735	99.884
32.6667	1960	5.531	36.365	49.849	92.073	92.367	91.565	101.951	100.763	100.614	102.829	97.518	101.986	97.11	90.661	91.882	92.673	92.902	92.365	89.424	90.851	90.347	90.647	88.4	90.469	102.425	94.351	95.573	97.108	96.931	97.533	96.329	95.884	95.745	96.149	94.092	97.484	104.927	96.849	96.784	98.708	98.582	98.18	98.035	100.82	97.337	95.927	96.798	100.008
33	1980	5.469	37.143	50.469	92.684	93.388	92.335	102.19	101.19	100.967	103.2	97.998	102.202	97.443	91.124	92.071	92.729	93.11	92.675	89.786	91.088	90.59	90.733	88.704	90.443	103.025	94.68	95.914	97.114	97.127	97.645	96.425	96.429	95.829	95.971	94.131	97.659	105.053	97.031	97.406	98.841	99.006	98.314	98.165	101.306	97.439	96.086	96.849	100.284
33.3333	2000	5.504	37.6	50.949	93.32	93.869	93.1	102.396	101.396	101.155	103.304	98.247	102.38	97.475	91.333	92.176	92.784	93.286	92.747	89.776	91.214	90.351	90.631	88.884	90.722	102.586	94.688	95.8	97.316	97.296	97.647	96.702	96.414	95.804	95.622	94	97.769	105.194	97.243	97.076	99.059	98.914	98.427	98.214	101.151	97.424	96.327	97.106	100.257
33.6667	2020	5.596	38.359	51.694	94.051	94.476	93.665	102.569	101.384	101.396	103.475	98.361	102.576	97.655	91.584	92.184	93.008	93.475	92.939	90.324	91.069	90.639	90.91	88.647	90.671	102.79	94.639	95.661	97.388	97.525	97.876	96.941	96.684	95.724	95.347	94.041	97.627	105.318	97.269	97.302	99.055	99.192	98.692	98.296	101.273	97.482	96.21	97.122	100.255
34	2040	5.525	38.867	52.025	94.233	94.678	94.012	102.759	101.58	101.233	103.547	98.292	102.584	97.602	91.71	92.498	92.947	93.478	92.698	89.931	91.245	90.549	91.075	88.908	90.818	102.769	94.667	95.931	97.308	97.108	97.757	96.475	96.318	95.953	95.796	94.21	97.792	105.304	97.114	97.367	99.139	99.206	98.616	98.28	101.243	97.643	96.475	97.439	100.643
34.3333	2060	5.571	39.453	52.455	95.133	95.561	94.576	102.957	101.914	101.659	103.831	98.455	102.818	97.702	91.8	92.294	93.165	93.48	92.918	90.049	91.431	90.716	90.99	88.906	90.984	103.4	94.708	95.955	97.463	97.275	97.635	96.62	96.363	96.063	96.314	94.247	97.973	105.237	97.539	97.396	98.967	99.033	98.669	98.486	101.324	97.802	96.488	97.357	100.58
34.6667	2080	5.514	40.173	53.078	95.79	96.096	95.21	102.947	101.757	101.702	103.818	98.624	103.12	97.963	91.622	92.345	93.11	93.845	93.186	90.31	91.539	90.712	90.843	88.731	91.061	103.29	94.722	95.963	97.28	97.378	97.778	96.661	96.461	95.894	96.347	94.137	97.831	105.569	97.602	97.294	99.249	99.055	98.906	98.529	101.227	97.739	96.555	97.565	100.425
35	2100	5.49	40.753	53.647	95.986	96.449	95.584	103.055	101.816	101.72	103.8	98.659	102.857	97.816	91.498	92.049	92.929	93.584	93.208	90.324	91.135	90.549	90.822	88.735	90.675	102.863	94.576	95.955	97.249	97.422	98.233	96.988	96.492	95.78	95.582	94.222	97.643	105.439	97.259	97.198	99.135	99.347	98.469	98.384	101.263	97.706	96.518	97.28	100.453
35.3333	2120	5.529	41.316	54.008	96.18	96.782	95.792	103.312	101.986	101.843	103.965	98.78	103.139	97.839	91.749	92.212	92.937	93.451	92.965	90.088	91.306	90.765	91.09	88.761	90.739	102.992	94.659	96.227	97.392	97.28	97.861	96.467	96.565	95.843	96.353	94.318	97.873	105.61	97.478	97.643	99.375	99.378	98.912	98.5	101.5	97.818	96.622	97.576	100.594
35.6667	2140	5.594	41.688	54.482	97.057	97.61	96.608	103.629	102.478	102.355	104.294	99.384	103.547	98.373	92.092	92.753	93.29	93.725	93.147	90.553	91.941	91.28	91.622	89.341	91.416	103.524	95.037	96.371	97.629	97.367	97.818	96.694	96.588	96.159	96.116	94.453	98.145	105.89	97.647	97.553	99.657	99.549	98.984	98.802	101.88	98.133	96.847	97.651	101.018
36	2160	5.433	42.243	54.906	97.28	97.651	96.829	103.553	102.486	102.249	104.214	99.257	103.286	97.945	92.025	92.641	93.273	93.804	93.19	90.606	91.627	91.206	91.702	89.355	91.243	102.878	94.822	95.994	97.559	97.271	97.898	96.496	96.48	95.914	96.386	94.404	98.043	105.629	97.669	97.735	99.504	99.604	99.22	98.771	101.771	98.131	96.718	97.667	100.804
36.3333	2180	5.559	42.808	55.459	97.72	98.259	97.237	103.657	102.525	102.504	104.469	99.414	103.525	98.065	92.061	92.694	93.498	94.088	93.341	90.514	91.584	91.214	91.749	89.331	91.163	102.924	94.971	96.267	97.484	97.512	98.037	96.627	96.575	96.255	95.81	94.169	98.408	105.916	97.798	97.627	99.68	99.751	99.22	98.749	101.818	98.175	96.749	97.739	100.863
36.6667	2200	5.422	43.506	55.939	98.106	98.465	97.624	103.867	102.822	102.594	104.684	99.465	103.755	98.129	91.837	93.006	93.547	94.149	93.496	90.863	91.861	91.088	91.563	89.486	91.431	102.963	94.98	96.106	97.604	97.596	98.004	96.665	96.688	96.327	96.449	94.42	98.371	105.831	97.802	97.661	99.475	99.51	99.086	98.892	101.892	98.184	97.022	97.857	100.953
37	2220	5.514	43.888	56.398	98.447	99.071	97.973	103.929	102.798	102.631	104.825	99.522	103.927	98.122	92.033	92.882	93.545	94.018	93.441	90.831	91.743	91.206	91.61	89.461	91.537	102.98	94.933	96.314	97.68	97.443	98.173	96.645	96.806	96.414	96.622	94.449	98.116	105.835	97.827	97.804	99.694	99.706	99.045	98.831	101.973	98.222	97	97.922	101.149
37.3333	2240	5.533	44.729	57.351	98.925	99.414	98.355	103.737	102.755	102.49	104.608	99.337	103.496	98.586	91.9	92.518	93.306	94.218	93.869	90.829	91.841	91.2	91.865	89.249	91.531	103.275	94.925	96.371	97.529	97.631	98.127	96.798	96.778	96.09	95.91	94.486	98.1	105.859	97.767	97.675	99.698	99.786	99.033	98.969	101.912	98.041	96.643	97.727	100.882
37.6667	2260	5.498	45.039	57.48	99.155	99.614	98.635	104.143	102.904	102.912	104.818	99.567	103.743	98.418	92.441	93.149	93.637	94.235	93.639	90.822	92.073	91.416	91.853	89.622	91.451	103.124	95.21	96.62	97.961	97.582	98.029	96.767	96.686	96.545	95.865	94.563	98.282	106.167	98.057	97.933	99.651	99.829	99.235	99.227	102.09	98.231	97.043	97.931	101.251
38	2280	5.518	45.598	58.051	99.72	100.167	99.135	104.361	103.316	102.998	104.984	99.869	104.129	98.537	92.435	93.402	94.057	94.294	93.935	90.906	92.075	91.584	91.947	89.733	91.849	103.584	95.676	96.818	98.043	97.733	98.286	96.878	96.859	96.563	96.031	94.9	98.406	106.376	98.104	98.102	99.835	100.071	99.486	99.124	102.386	98.484	97.208	97.953	101.28
38.3333	2300	5.58	46.19	58.676	99.988	100.273	99.418	104.396	103.28	103.078	105.025	99.833	103.967	98.784	92.561	93.388	94.061	94.669	94.029	91.131	92.331	91.688	92.337	89.876	91.835	103.737	95.549	97.01	98.088	98.092	98.62	97.153	97.249	96.678	95.975	94.953	98.637	106.092	98.039	97.947	100.137	100.184	99.555	99.296	102.255	98.48	97.118	98.229	101.294
38.6667	2320	5.545	46.62	59.006	100.329	100.812	99.637	104.794	103.459	103.351	104.984	99.937	104.333	98.765	92.857	93.473	94.3	94.737	94.057	91.457	92.571	91.804	92.351	90.098	91.924	104.096	95.939	97.047	98.533	98.335	98.89	97.424	97.361	96.682	96.229	95.331	99.022	106.471	98.339	98.235	100.306	100.216	99.678	99.429	102.365	98.516	97.502	98.408	101.463
39	2340	5.592	47.206	59.629	100.412	101.035	100.049	104.624	103.524	103.492	105.173	99.969	104.345	98.894	92.708	93.69	94.229	94.955	94.408	91.631	92.698	92.147	93.061	90.298	92.318	104.378	96.09	97.269	98.688	98.388	99.031	97.537	97.475	97.035	96.918	95.539	99.161	106.339	98.4	98.28	100.255	100.278	99.608	99.58	102.327	98.767	97.384	98.212	101.622
39.3333	2360	5.376	47.667	59.945	100.814	101.069	100.22	104.827	103.543	103.506	105.382	100.314	104.378	99.031	93.031	93.651	94.318	94.89	94.375	91.657	92.831	92.094	92.618	90.3	92.331	104.416	96.29	97.69	98.767	98.739	98.98	97.675	97.508	97.198	97.302	95.263	99.145	106.478	98.306	98.225	100.078	100.282	99.525	99.484	102.567	98.79	97.427	98.435	101.571
39.6667	2380	5.576	48.137	60.655	101.014	101.424	100.659	104.939	103.684	103.408	105.584	100.265	104.565	99.312	93.259	93.827	94.339	95.033	94.469	91.873	92.596	92.202	92.808	90.327	92.539	104.584	96.375	97.686	99.139	99.143	99.473	98.163	98.222	97.308	97.822	95.659	99.188	106.375	98.394	98.216	100.261	100.243	99.886	99.631	102.496	98.89	97.639	98.484	101.716
40	2400	5.465	48.649	60.943	101.3	101.692	100.873	104.851	103.72	103.673	105.316	100.182	104.59	99.359	93.059	93.875	94.59	95.004	94.504	91.612	92.694	92.39	92.984	90.569	92.404	104.806	96.606	97.961	99.173	98.959	99.476	97.906	97.984	97.68	97.906	95.945	99.416	106.727	98.296	98.555	100.424	100.324	99.79	99.743	102.659	99.075	97.52	98.38	101.682
40.3333	2420	5.539	49.239	61.557	101.612	102.059	101.245	105.09	103.773	103.79	105.39	100.443	104.729	99.661	93.602	93.976	94.771	95.394	94.759	91.975	93.204	92.478	93.208	90.81	92.798	105.202	96.696	98.165	99.553	99.308	99.871	98.416	98.225	97.845	97.512	96.114	99.908	106.747	98.653	98.375	100.502	100.365	99.871	99.769	102.52	98.851	97.612	98.733	101.839
40.6667	2440	5.465	49.753	62.069	101.898	102.559	101.39	105.137	104.039	103.847	105.48	100.598	104.961	99.837	93.555	94.424	94.982	95.514	94.965	92.145	93.333	92.68	93.427	91.071	92.918	105.459	96.994	98.482	99.592	99.608	99.98	98.59	98.4	98.265	97.629	96.065	100.153	106.778	98.543	98.782	100.514	100.688	100.139	99.996	102.855	99.163	97.692	98.675	102.045
41	2460	5.5	49.947	62.386	102.216	102.482	101.553	105.278	104.016	103.886	105.835	100.778	104.837	99.633	93.816	94.431	95.125	95.547	95.053	92.092	93.573	92.878	93.614	91.212	92.978	105.384	97.143	98.739	99.924	99.339	100.12	98.375	98.649	98.157	98.298	96.441	100.1	106.716	98.582	98.563	100.418	100.533	100.153	99.855	102.771	99.202	97.735	98.696	101.978
41.3333	2480	5.496	50.745	62.847	102.322	102.825	101.737	105.333	104.063	103.763	105.59	100.761	105.129	100.082	93.904	94.482	95.327	95.904	95.267	92.406	93.445	92.98	93.537	91.1	93.324	105.541	97.292	98.782	100.19	99.859	100.155	98.782	98.994	98.412	98.935	96.512	100.357	107.01	98.776	98.531	100.414	100.61	100.096	99.902	102.761	99.273	97.849	98.841	102.035
41.6667	2500	5.48	51.069	63.357	102.667	103.108	102.024	105.453	104.3	104.245	106.192	100.871	105.133	100.292	94.149	94.757	95.592	95.857	95.384	92.463	93.467	93.061	94.078	91.175	93.19	105.706	97.604	99.053	100.167	99.906	100.643	99.039	99.092	98.665	98.525	96.702	100.624	106.873	98.859	98.598	100.549	100.571	100.116	99.851	102.722	99.294	97.853	98.829	102.212
42	2520	5.543	51.363	64.02	102.782	103.429	102.22	105.52	104.382	103.99	105.845	100.982	105.255	100.267	94.237	94.916	95.569	96.127	95.38	92.567	93.504	92.884	93.629	91.102	93.184	105.706	97.722	98.92	100.343	100.092	100.724	99	99.11	98.794	98.563	96.776	100.665	106.8	98.802	98.661	100.788	100.747	100.116	100.02	103.073	99.537	97.729	98.78	102.053
42.3333	2540	5.551	51.986	64.675	103.102	103.592	102.647	105.531	104.418	104.343	106.265	100.996	104.953	100.863	94.335	95.314	95.786	96.394	95.949	93.102	94.335	93.184	94.078	91.649	93.676	106.353	97.845	99.32	100.629	100.629	100.976	99.514	99.645	99.082	99.212	97.165	100.931	107.129	98.878	98.949	100.902	101.051	100.347	100.12	102.975	99.365	98.059	98.906	102.155
42.6667	2560	5.567	52.453	64.82	102.976	103.686	102.545	105.639	104.498	104.222	106.004	100.959	105.249	100.596	94.473	95.22	95.878	96.082	95.641	92.82	94.086	93.278	94.249	91.698	93.824	105.939	97.676	99.465	100.688	100.304	100.963	99.292	99.516	99.039	99.416	97.118	100.996	107.137	98.967	98.729	100.857	100.745	100.194	100.218	102.869	99.19	98.098	98.924	102.112
43	2580	5.525	53.306	65.445	103.173	103.912	103.145	105.592	104.296	104.367	106.278	101.027	105.418	101.114	94.545	95.433	95.91	96.329	96.157	93.173	94.055	93.529	94.514	91.827	94.051	106.471	97.994	99.575	100.671	100.678	101.247	99.945	99.735	99.42	99.096	97.137	101.075	107.069	98.931	98.806	100.89	100.898	100.347	100.231	103.1	99.392	98.171	99.151	102.476
43.3333	2600	5.649	53.563	65.89	103.661	104.21	103.141	105.857	104.592	104.38	106.406	101.022	105.333	101.202	95.082	95.873	96.261	96.769	96.22	93.296	94.549	93.935	95.016	92.22	94.31	106.722	98.206	99.747	100.761	100.676	101.331	99.849	99.992	99.459	99.475	97.565	101.376	107.222	99.39	99.275	101.057	101.051	100.355	100.365	103.188	99.625	98.171	99.163	102.394
43.6667	2620	5.5	54.194	66.235	103.857	104.098	103.098	105.81	104.545	104.555	106.045	101.194	105.614	101.027	94.929	95.567	96.351	96.814	96.065	93.159	94.359	94.029	94.549	92.014	94.175	106.69	98.186	99.618	100.957	100.645	101.304	99.773	99.81	99.553	99.561	97.51	101.104	107.208	99.073	98.988	100.818	101.067	100.608	100.141	103.371	99.453	98.09	99.025	102.355
44	2640	5.665	54.386	66.598	104.027	104.251	103.504	105.786	104.596	104.561	106.367	101.249	105.578	100.988	95.027	95.61	96.265	96.969	96.306	93.647	94.873	93.988	94.851	92.386	94.171	106.741	98.296	99.886	101.194	100.576	101.265	99.867	99.963	99.541	99.541	97.61	101.318	107.355	99.108	99.108	100.835	100.763	100.678	100.263	103.388	99.569	98.282	99.263	102.455
44.3333	2660	5.459	55.029	67.324	104.225	104.655	103.659	105.98	104.869	104.555	106.571	101.173	105.653	101.451	95.171	95.778	96.661	97.169	96.537	93.69	94.896	94.198	95.045	92.441	94.42	106.833	98.602	99.949	101.214	101.086	101.667	100.151	100.222	99.771	99.716	97.776	101.516	107.294	99.171	99.131	101.259	101.118	100.706	100.296	103.304	99.569	98.108	99.204	102.555
44.6667	2680	5.549	55.404	67.851	104.269	104.733	103.978	106.059	104.878	104.531	106.471	101.5	105.618	101.463	94.935	95.937	96.663	97.169	96.853	94.175	94.835	94.331	95.369	92.678	94.961	106.884	98.341	100.243	101.398	101.167	101.969	100.531	100.492	99.833	99.88	97.822	101.592	107.618	99.133	99.235	101.153	101.28	100.624	100.406	103.349	99.896	98.547	99.324	102.629
45	2700	5.469	55.833	68.171	104.492	105.016	103.924	106.202	104.684	104.686	106.363	101.429	105.735	101.3	95.667	95.849	97.055	97.312	96.845	94.251	95.22	94.643	95.208	92.906	94.908	106.716	98.563	100.096	101.241	101.02	101.831	100.375	100.355	99.943	99.975	97.929	101.82	107.443	99.302	99.263	101.137	101.102	100.62	100.431	103.329	99.829	98.396	99.302	102.598
45.3333	2720	5.647	56.225	68.369	104.514	104.835	103.922	105.955	104.812	104.641	106.671	101.459	105.725	101.365	95.035	95.953	96.831	97.388	96.9	94.045	95.016	94.549	95.625	92.629	94.941	107.012	98.682	100.11	101.61	101.196	101.616	100.137	100.273	100.012	99.853	97.99	101.731	107.433	99.082	99.063	101.106	101.173	100.553	100.455	103.467	99.72	98.337	99.216	102.653
45.6667	2740	5.549	56.753	68.769	104.784	105.204	104.375	105.922	104.796	104.745	106.624	101.575	105.796	101.529	95.806	96.108	97.141	97.629	97.165	94.282	95.212	94.614	95.445	92.986	94.875	106.945	98.547	100.22	101.441	101.045	101.816	100.478	100.437	100.073	100.018	98.278	101.89	107.496	99.331	99.335	101.259	101.069	100.733	100.518	103.429	99.739	98.496	99.286	102.571
46	2760	5.576	57.173	69.684	104.727	104.931	104.488	106.155	105.061	104.694	106.61	101.645	105.835	101.733	95.286	96.049	97.014	97.829	97.082	94.433	95.498	94.761	95.684	92.888	95.235	106.988	98.743	100.388	101.469	101.545	102.163	100.663	100.735	100.131	100.002	98.22	101.861	107.429	99.31	98.994	101.163	101.08	100.582	100.608	103.161	99.859	98.371	99.288	102.569
46.3333	2780	5.529	57.633	70.096	105.133	105.355	104.545	106.029	105.069	104.749	106.704	101.586	105.798	101.488	95.792	96.225	97.173	97.871	97.255	94.494	95.59	94.91	95.804	93.075	95.327	107.292	98.808	100.351	101.649	101.439	102.037	100.51	100.596	100.384	100.257	98.276	102.006	107.622	99.392	99.296	101.269	101.308	100.788	100.516	103.659	99.765	98.514	99.488	102.69
46.6667	2800	5.496	58.241	70.516	105.235	105.661	104.798	106.275	105.065	104.902	106.708	101.506	105.863	101.863	95.612	96.378	97.463	97.947	97.547	94.657	95.455	94.916	96.151	93.149	95.269	107.196	99.173	100.524	101.727	101.712	102.504	100.929	100.998	100.502	100.175	98.233	101.953	107.537	99.457	99.414	101.365	101.329	100.82	100.663	103.678	99.963	98.592	99.382	102.92
47	2820	5.512	58.563	70.708	105.284	105.576	104.563	106.086	104.982	104.751	106.761	101.647	105.743	101.602	95.622	96.051	97.341	97.91	97.386	94.331	95.32	94.992	96.055	93.208	95.533	107.418	98.88	100.249	101.576	101.5	102.082	100.602	100.586	100.378	100.135	98.257	102.049	107.598	99.463	99.371	101.376	101.306	100.835	100.639	103.663	99.896	98.467	99.343	102.651
47.3333	2840	5.494	59.022	71.265	105.218	105.798	104.724	106.159	105.033	104.694	106.757	101.612	105.961	101.778	95.753	96.351	97.743	98.09	97.386	94.629	95.796	95.229	96.035	93.488	95.58	107.325	99.031	100.478	101.939	101.5	102.1	100.549	100.6	100.351	100.198	98.39	102.337	107.59	99.408	99.357	101.418	101.435	100.631	100.725	103.49	99.918	98.653	99.478	102.676
47.6667	2860	5.649	59.51	71.747	105.512	105.884	104.827	106.343	105.059	104.818	106.845	101.845	105.98	101.955	96.035	96.682	97.741	98.059	97.612	94.792	95.808	95.21	96.376	93.475	95.565	107.537	99.078	100.563	101.753	101.663	102.288	100.614	100.749	100.175	100.333	98.622	102.2	107.561	99.551	99.402	101.367	101.333	100.698	100.59	103.745	99.775	98.58	99.406	102.825
48	2880	5.578	60.182	72.296	105.657	106.204	105.271	106.535	105.278	105.22	106.947	101.98	106.088	102.494	96.31	96.735	97.969	98.339	97.778	95.139	96.184	95.498	96.612	93.639	95.898	107.525	99.318	100.853	102.092	102.069	102.586	101.278	101.324	100.427	100.686	98.684	102.508	107.627	99.676	99.496	101.512	101.382	101.131	100.763	103.937	100.014	98.675	99.833	103.131
48.3333	2900	5.522	60.575	72.684	105.816	106.406	105.406	106.522	105.253	105.086	107.02	102.045	106.131	102.184	96.257	96.814	97.957	98.392	97.882	95.182	96.292	95.704	96.508	93.794	95.871	107.588	99.508	100.876	102.388	101.925	102.488	101.045	101.055	100.661	100.508	98.8	102.506	107.794	99.665	99.575	101.71	101.635	100.935	100.896	103.835	100.127	98.81	99.741	102.994
48.6667	2920	5.433	61.078	73.271	105.916	106.367	105.369	106.614	105.484	105.088	107.145	101.933	106.269	102.633	96.782	97.075	97.998	98.78	98.053	95.276	96.384	95.735	96.839	94.006	96.073	107.925	99.539	101.218	102.312	102.108	102.643	101.316	101.139	100.708	100.669	98.869	102.496	108.01	99.731	99.745	101.62	101.724	101.202	101.029	103.882	100.257	98.876	99.798	103.067
49	2940	5.529	61.265	73.475	105.82	106.541	105.52	106.541	105.231	105.078	106.918	101.788	106.153	102.4	96.486	97.055	98.102	98.582	98.018	95.08	96.312	95.759	96.635	93.796	95.89	107.596	99.371	100.89	102.153	102.035	102.69	101.184	101.396	100.578	100.082	98.818	102.463	107.678	99.52	99.533	101.414	101.38	100.955	100.773	103.78	100.09	98.788	99.706	102.933
49.3333	2960	5.516	61.731	73.906	105.759	106.516	105.402	106.437	105.184	105.075	106.957	102.008	106.102	102.467	96.537	97.218	98.202	98.686	98.055	95.214	96.376	95.861	96.665	93.825	96.092	107.878	99.451	101.104	102.235	102.031	102.412	101.208	101.208	100.557	100.71	99.1	102.706	107.861	99.6	99.761	101.631	101.559	101.008	101.01	103.833	100.047	98.88	99.749	103.09
49.6667	2980	5.392	62.535	74.61	106.271	106.692	105.7	106.669	105.547	105.371	107.147	102.02	106.276	102.894	96.753	97.292	98.327	98.802	98.475	95.737	96.725	95.922	97.1	94.269	96.392	108.184	99.518	101.108	102.571	102.42	102.831	101.406	101.567	101.086	100.192	99.063	102.696	107.99	99.853	99.757	101.692	101.9	101.267	101.188	104.251	100.265	98.931	100.004	103.347
50	3000	5.396	62.839	74.755	106.247	106.857	105.608	106.751	105.584	105.29	107.153	102.137	106.271	102.78	96.71	97.261	98.443	98.914	97.996	95.563	96.659	96.143	97.061	94.184	96.365	108.133	99.59	100.833	102.408	102.214	102.757	101.3	101.433	100.616	100.61	98.984	102.916	107.78	99.873	99.765	101.649	101.861	101.178	100.975	103.863	100.151	98.969	99.735	103.147
50.3333	3020	5.461	63.363	75.137	106.49	106.825	105.849	106.688	105.341	105.155	107.149	102.149	106.394	103.067	96.9	97.584	98.339	98.786	98.443	95.984	96.731	95.759	97.122	94.392	96.28	107.925	99.471	101.286	102.535	102.68	102.986	101.567	101.62	100.957	100.206	99.041	102.798	108.073	99.733	99.792	101.735	101.888	101.175	100.906	104.1	100.218	98.743	99.89	103.016
50.6667	3040	5.463	63.714	75.845	106.31	106.896	105.988	106.541	105.537	105.392	107.229	102.122	106.433	103.455	97.037	97.69	98.451	99.102	98.751	95.767	96.778	95.965	97.031	94.425	96.565	108.41	99.688	101.339	102.673	102.629	102.994	101.751	101.747	100.833	100.61	99.025	102.969	107.878	99.892	99.659	101.873	101.647	101.382	101.18	104.067	100.314	98.984	99.71	103.216
51.0042	3060.25	5.408	64.147	75.867	106.522	107	105.949	106.645	105.637	105.351	107.571	102.48	106.651	103.284	97.259	97.731	98.906	99.304	98.72	96.024	97.08	96.3	97.692	94.571	96.957	108.239	100.053	101.349	102.845	102.643	103.029	101.898	101.802	101.094	100.635	99.465	103.271	107.988	99.825	99.747	101.661	101.714	101.231	101.071	104.037	100.565	98.98	99.996	103.312
51.3333	3080	5.506	64.486	76.361	106.684	107.122	106.145	106.814	105.267	105.202	107.373	102.284	106.347	103.51	97.298	97.831	98.778	99.176	98.794	95.869	97.092	96.22	97.512	94.616	96.712	108.4	99.822	101.329	102.906	102.559	103.09	101.745	101.682	101.012	100.29	99.204	103.145	107.978	99.831	99.941	101.763	101.778	101.3	101.047	103.931	100.265	98.986	99.837	103.208
51.6667	3100	5.461	64.99	76.714	106.659	106.888	106.21	106.714	105.661	105.396	107.202	102.355	106.49	103.455	97.357	97.963	99.02	99.457	98.916	95.931	97.351	96.386	97.61	94.7	96.798	108.567	99.871	101.62	102.792	102.751	103.02	101.927	101.735	101.061	100.4	99.361	103.31	107.894	99.89	99.653	101.89	101.824	101.257	101.206	104.143	100.547	98.922	100.084	103.349
52	3120	5.394	65.29	77.159	106.747	107.376	106.284	106.776	105.712	105.41	107.331	102.351	106.429	103.588	97.584	97.898	99.069	99.594	98.916	96.096	97.261	96.557	97.743	94.784	97.02	108.457	100.016	101.724	103.016	102.722	103.257	101.718	101.818	101.449	100.775	99.586	103.441	108.294	100.067	99.892	102.067	101.99	101.39	101.214	104.206	100.473	99.086	100.222	103.308
52.3333	3140	5.514	65.871	77.32	106.751	107.31	106.359	106.731	105.563	105.216	107.096	102.349	106.418	103.788	97.563	98.182	98.896	99.873	99.016	96.186	97.296	96.473	97.347	94.665	96.965	108.467	99.975	101.6	102.849	102.796	103.345	102.041	101.818	101.255	100.533	99.427	103.463	107.976	99.778	99.959	101.825	101.81	101.278	101.141	104.078	100.58	99.063	100.063	103.204
52.6667	3160	5.537	66.165	77.773	106.963	107.296	106.304	106.818	105.682	105.376	107.216	102.151	106.482	103.675	97.673	98.133	99.245	99.725	98.949	96.239	97.429	96.549	97.58	94.827	97.202	108.543	99.99	101.565	102.825	102.908	103.6	101.973	102.116	101.351	100.647	99.596	103.376	108.088	100.043	99.857	101.657	101.961	101.225	101.388	104.178	100.463	99.178	99.904	103.496
53	3180	5.416	66.669	77.922	106.955	107.424	106.686	106.81	105.598	105.533	107.425	102.182	106.531	104.225	97.822	98.125	99.265	99.578	99.278	96.367	97.569	96.684	97.718	95.192	97.204	108.647	100.104	101.684	103.063	103.035	103.578	102.159	102.122	101.276	100.58	99.727	103.645	108.365	99.927	99.925	101.847	101.931	101.353	101.476	104.284	100.351	99.102	99.896	103.347
53.3375	3200.25	5.476	67.086	78.188	106.841	107.378	106.498	106.865	105.712	105.639	107.251	102.263	106.606	104.08	97.92	98.398	99.28	99.998	99.431	96.755	97.624	96.953	98.002	95.267	97.48	108.947	100.4	101.863	103.333	103.157	103.706	102.075	102.047	101.598	100.863	99.927	103.524	108.235	100.004	99.965	102.078	102.002	101.453	101.355	104.214	100.624	99.145	100.039	103.422
53.6708	3220.25	5.469	67.606	78.686	107.045	107.59	106.673	106.865	105.796	105.467	107.49	102.457	106.608	104.253	98.055	98.482	99.504	100.037	99.363	96.682	97.782	96.973	97.967	95.157	97.594	108.755	100.349	101.937	103.251	102.888	103.378	102.065	102.071	101.514	100.931	100.01	103.553	108.188	100.012	100.049	102.09	101.971	101.471	101.208	104.178	100.592	99.118	100.09	103.235
54	3240	5.516	68.198	78.845	107.055	107.576	106.667	106.975	105.724	105.653	107.518	102.51	106.578	104.188	98.235	98.673	99.533	100.049	99.288	96.869	97.767	96.994	98.098	95.169	97.586	108.739	100.406	101.939	103.224	103.433	103.784	102.39	102.404	101.749	100.771	99.784	103.608	108.237	99.929	100.116	101.916	102.027	101.486	101.435	104.235	100.58	99.235	100.076	103.304
54.3333	3260	5.429	68.404	79.267	107.218	107.406	106.69	106.712	105.557	105.435	107.635	102.371	106.567	104.39	98.116	98.776	99.555	100.235	99.773	96.69	97.62	97.016	98.3	95.522	97.324	108.894	100.343	101.822	103.278	103.251	103.973	102.339	102.357	101.62	100.835	99.822	103.537	108.214	100.02	100.002	102.051	101.816	101.433	101.357	104.251	100.457	99.025	100.363	103.341
54.6708	3280.25	5.388	68.753	79.696	107.239	107.598	106.678	106.98	105.622	105.624	107.58	102.455	106.645	104.378	98.41	98.892	99.576	100.163	99.576	96.845	97.898	97.116	98.29	95.416	97.678	109.275	100.369	101.967	103.516	103.339	103.659	102.206	102.314	101.835	101.165	100.102	103.916	108.382	100.045	100.194	102.131	102.029	101.504	101.467	104.4	100.698	99.461	100.204	103.535
55	3300	5.365	69.243	79.669	107.161	107.584	106.494	106.727	105.778	105.337	107.365	102.284	106.541	104.408	98.284	98.808	99.673	100.118	99.771	96.822	97.888	97.024	98.461	95.322	97.545	109.002	100.237	101.876	103.333	103.457	104	102.296	102.502	101.639	101.124	100.029	103.704	108.118	99.896	99.971	101.806	101.884	101.582	101.153	104.245	100.49	99.227	100.224	103.404
55.3333	3320	5.527	69.684	80.008	107.216	107.72	106.684	107.076	105.647	105.608	107.576	102.563	106.643	104.467	98.41	98.965	99.935	100.212	99.871	97.035	98.086	97.224	98.408	95.475	97.918	109.155	100.592	102.216	103.48	103.1	103.847	102.349	102.51	101.69	101.306	100.318	104.031	108.288	100.065	100.061	102.016	102.102	101.525	101.439	104.345	100.59	99.565	100.343	103.553
55.6667	3340	5.524	69.953	80.243	107.445	107.898	106.888	106.841	105.767	105.535	107.549	102.447	106.786	104.453	98.722	99.222	100.022	100.398	99.914	97.031	98.031	97.418	98.694	95.594	98.12	109.194	100.782	101.975	103.58	103.251	103.986	102.575	102.555	101.784	101.282	100.414	104.031	108.292	100.014	100.014	102.043	102.08	101.443	101.396	104.112	100.608	99.41	100.237	103.488
56.0042	3360.25	5.529	70.402	80.686	107.508	108.069	106.949	107.186	106.033	105.808	107.629	102.541	106.845	104.798	98.89	99.306	100.406	100.678	100.176	97.333	98.667	97.543	99.008	95.933	98.196	109.355	100.68	102.624	103.665	103.549	104.02	102.506	102.751	101.945	101.376	100.475	104.184	108.459	100.278	100.076	102.018	102.314	101.492	101.384	104.518	100.833	99.422	100.384	103.712
56.3333	3380	5.484	70.9	80.922	107.39	108.069	106.775	106.9	105.639	105.541	107.518	102.522	106.708	104.776	98.733	99.429	99.961	100.394	99.933	97.171	98.257	97.606	98.645	95.624	98.094	109.169	100.547	102.345	103.51	103.331	103.761	102.386	102.506	101.755	101.186	100.159	103.98	108.265	100.12	100.304	102.043	101.959	101.353	101.314	104.453	100.543	99.224	100.018	103.392
56.6708	3400.25	5.414	71.282	81.21	107.602	107.92	107.006	107.129	105.755	105.7	107.565	102.522	106.669	104.912	98.88	99.618	100.324	100.773	100.357	97.48	98.231	97.873	98.857	96.029	98.259	109.592	100.869	102.567	104.071	103.473	104.053	102.708	102.851	101.935	101.504	100.478	104.333	108.341	100.488	100.184	102.396	102.331	101.769	101.641	104.671	100.814	99.461	100.353	103.973
57.0042	3420.25	5.378	71.663	81.302	107.629	108.212	107.184	107.263	105.904	105.896	107.886	102.655	106.937	105.102	99.263	99.571	100.541	100.963	100.384	97.58	98.696	97.847	99.143	96.039	98.639	109.576	101.143	102.637	103.933	103.706	104.235	102.82	102.818	102.271	101.569	100.633	104.404	108.455	100.369	100.322	102.241	102.116	101.737	101.463	104.488	101.102	99.52	100.412	103.645
57.3375	3440.25	5.5	72.02	81.465	107.571	108.202	107.227	107.1	106.008	105.749	107.682	102.825	106.916	105.373	99.322	99.449	100.433	100.908	100.32	97.592	98.504	98.063	98.79	96.184	98.351	109.531	100.965	102.598	103.784	103.747	104.378	103.049	102.906	102.153	101.359	100.647	104.19	108.367	100.333	100.412	102.163	102.147	101.751	101.602	104.665	100.786	99.371	100.475	103.775
57.6667	3460	5.553	72.416	81.588	107.724	108.243	107.096	106.965	106.073	105.68	107.876	102.771	106.982	105.171	99.096	99.753	100.527	100.998	100.339	97.731	98.804	97.947	98.9	96.127	98.643	109.722	101.073	102.637	103.81	103.665	104.147	102.896	102.912	102.4	101.484	100.718	104.482	108.414	100.255	100.269	102.025	102.173	101.765	101.612	104.841	100.763	99.514	100.412	103.61
58.0042	3480.25	5.467	72.618	81.792	107.635	108.116	107.28	107.061	105.904	105.729	107.645	102.425	106.576	105.418	99.249	99.669	100.51	101.076	100.506	97.753	98.682	98	99.245	96.171	98.502	109.769	101.169	102.829	104.084	103.82	104.471	103.024	103.047	102.482	101.682	100.665	104.414	108.327	100.196	100.265	102.312	102.261	101.755	101.504	104.467	100.778	99.202	100.42	103.541
58.3333	3500	5.635	73.098	82.047	107.849	108.443	107.061	106.943	106.033	105.892	107.682	102.573	106.853	105.457	99.247	99.861	100.72	100.947	100.737	97.671	98.737	98.098	99.404	96.382	98.308	109.778	101.069	102.737	104.043	103.724	104.335	102.873	103.08	102.316	101.498	100.547	104.329	108.504	100.429	100.227	102.308	102.239	101.7	101.676	104.629	100.843	99.388	100.324	103.831
58.6708	3520.25	5.388	73.567	82.324	107.886	108.327	107.312	107.145	106.225	105.8	107.849	102.678	106.89	105.208	99.351	99.794	100.796	101.098	100.702	97.818	99.167	98.12	99.414	96.469	98.729	109.863	101.196	102.99	104.122	103.859	104.359	102.998	103.175	102.247	101.68	100.722	104.498	108.263	100.453	100.335	102.167	102.5	101.733	101.675	104.733	100.908	99.475	100.533	103.804
59	3540	5.378	73.853	82.657	107.898	108.347	107.192	107.208	105.992	105.753	107.924	102.757	106.784	105.741	99.357	99.833	100.778	101.075	100.653	97.875	98.688	98.251	99.253	96.494	98.784	109.975	101.271	103.016	104.006	104.208	104.702	103.235	103.298	102.555	101.655	100.631	104.8	108.52	100.467	100.416	102.318	102.294	101.576	101.645	104.657	100.804	99.627	100.612	103.753
59.3333	3560	5.463	74.055	82.665	107.945	108.504	107.235	107.198	106.02	105.875	107.808	102.675	107.141	105.806	99.59	100.045	101.047	101.549	100.835	98.063	98.794	98.476	99.29	96.565	98.753	109.906	101.273	102.902	104.143	104.18	104.698	103.127	103.404	102.645	101.914	100.869	104.655	108.476	100.369	100.425	102.351	102.388	101.694	101.718	104.767	100.747	99.394	100.445	103.761
59.6708	3580.25	5.533	74.406	82.865	108.027	108.506	107.357	107.231	106.163	105.867	107.818	102.653	106.812	105.629	99.641	100.057	100.976	101.343	100.988	98.118	99.204	98.416	99.378	96.641	98.931	109.953	101.276	102.967	104.263	103.927	104.584	103.157	103.337	102.606	101.629	100.714	104.618	108.661	100.357	100.476	102.424	102.378	101.622	101.725	104.767	101.122	99.649	100.518	103.741
60.0042	3600.25	5.345	74.941	83.098	108.237	108.761	107.688	107.398	106.269	106.082	108.073	102.843	106.922	105.931	99.939	100.655	101.314	101.722	101.173	98.382	99.588	98.831	99.737	96.971	99.21	110.325	101.586	103.09	104.522	104.408	104.684	103.357	103.375	102.673	101.982	101.035	104.953	108.769	100.653	100.733	102.492	102.614	102.127	102.073	104.788	101.275	99.653	100.535	103.849
60.3375	3620.25	5.333	75.42	83.316	108.059	108.655	107.763	107.478	106.243	106.165	108.139	102.89	107.21	105.957	99.969	100.425	101.343	101.622	101.053	98.494	99.278	98.531	99.904	96.904	99.239	110.275	101.449	103.092	104.349	104.314	104.771	103.284	103.388	102.8	101.886	101.129	105.071	108.651	100.571	100.445	102.451	102.427	101.99	101.955	104.831	101.116	99.78	100.686	103.998
60.6708	3640.25	5.453	75.606	83.486	108.322	108.767	107.514	107.476	106.329	106.039	108	102.998	107.241	106.265	99.851	100.557	101.48	102.014	101.276	98.473	99.614	98.673	100.012	97.127	99.318	110.314	101.488	103.422	104.476	104.52	104.959	103.551	103.671	102.976	101.92	101.145	105.053	108.731	100.78	100.624	102.439	102.441	102.108	101.769	104.892	101.337	99.704	100.743	104.224
61.0042	3660.25	5.563	75.873	83.745	108.316	108.749	107.69	107.514	106.235	106.076	107.973	102.782	107.035	106.241	99.943	100.459	101.541	101.925	101.325	98.594	99.627	98.69	99.937	97.139	99.382	110.465	101.461	103.265	104.645	104.363	105.033	103.596	103.561	102.757	102.38	101.143	104.99	108.739	100.602	100.751	102.504	102.559	102.186	102.147	104.875	101.212	99.996	100.631	104.084
61.3375	3680.25	5.435	75.929	83.882	108.269	108.955	107.737	107.467	106.241	105.933	108.084	102.827	107.006	106.398	100.135	100.598	101.388	101.976	101.296	98.682	99.576	98.829	99.8	97.047	99.506	110.525	101.824	103.38	104.557	104.584	105.143	103.898	103.573	102.865	102.143	101.171	105.069	108.818	100.629	100.557	102.667	102.647	102.32	102.027	105.069	100.959	99.635	100.598	104.067
61.6667	3700	5.512	76.296	83.943	108.186	108.812	107.727	107.335	106.3	106.175	108.088	102.875	107.104	106.078	100.284	100.667	101.631	102.031	101.386	98.6	99.72	98.908	100.092	97.12	99.269	110.565	101.667	103.459	104.725	104.463	105.039	103.492	103.649	103.025	102.214	101.249	105.316	108.929	100.759	100.484	102.486	102.767	101.724	101.841	104.973	101.133	99.945	100.906	104.059
62.0042	3720.25	5.571	76.635	84.006	108.347	109.025	107.79	107.51	106.316	106.165	108.11	102.922	107.131	106.327	100.282	100.851	101.771	102.176	101.504	98.592	99.831	98.876	100.127	97.31	99.62	110.48	101.812	103.533	104.616	104.616	105.022	103.714	103.72	103.073	102.11	101.396	105.267	109.006	100.547	100.643	102.804	102.757	102.12	102.047	104.831	101.161	100.141	100.865	104.143
62.3375	3740.25	5.518	76.775	84.253	108.343	108.708	107.625	107.361	106.29	106.049	108.088	102.973	107.143	106.341	100.284	100.937	101.71	102.11	101.476	98.761	99.724	99.018	100.314	97.306	99.645	110.557	101.918	103.686	104.882	104.631	104.92	103.802	103.955	103.041	102.337	101.349	105.439	108.704	100.541	100.802	102.708	102.684	102.018	101.81	104.943	101.28	99.918	100.745	104.029
62.6708	3760.25	5.427	77.112	84.447	108.569	108.902	108.037	107.592	106.529	106.269	108.165	103.198	107.261	106.471	100.304	101.033	101.743	102.373	101.733	98.761	99.68	99.155	100.357	97.527	99.773	110.559	101.935	103.724	105.131	104.784	105.178	103.869	103.918	103.235	102.435	101.535	105.433	108.929	100.725	100.651	102.702	102.794	102.222	102.141	104.892	101.402	100.065	100.861	104.106
63.0042	3780.25	5.386	77.355	84.408	108.467	108.878	107.973	107.382	106.263	106.018	108.29	102.969	107.271	106.639	100.484	100.873	101.688	102.245	101.516	98.816	99.984	99.102	100.167	97.369	99.684	110.51	101.745	103.539	104.871	104.82	105.241	103.704	103.747	103.212	102.402	101.361	105.388	108.89	100.469	100.629	102.612	102.663	102.039	101.975	104.975	101.129	99.724	100.773	104.225
63.3375	3800.25	5.4	77.733	84.622	108.482	108.941	107.606	107.394	106.139	106.051	108.045	102.931	107.237	106.706	100.482	101.061	101.788	102.42	101.661	98.933	99.792	99.263	100.214	97.433	99.675	110.524	101.849	103.425	104.8	104.855	105.408	103.943	103.739	103.204	102.284	101.567	105.31	108.72	100.645	100.624	102.612	102.757	101.961	102.269	105.059	101.147	99.806	100.665	104.155
63.6708	3820.25	5.555	77.996	84.986	108.549	108.886	107.775	107.647	106.375	106.125	108.116	102.873	107.306	106.822	100.588	101.269	102.12	102.416	101.624	98.971	100.057	99.276	100.414	97.757	99.745	110.363	101.916	103.696	104.78	105.241	105.704	104.053	103.792	103.416	102.31	101.657	105.422	108.965	100.729	100.724	102.694	102.796	102.153	102.188	105.073	101.42	100.071	100.878	104.424
64.0042	3840.25	5.451	78.076	85.057	108.684	109.284	107.857	107.761	106.435	106.145	108.245	103.024	107.369	106.622	100.912	101.218	102.076	102.559	102.243	99.12	99.916	99.506	100.492	97.673	99.935	110.533	101.788	103.676	105.133	104.939	105.482	104.09	104.225	103.408	102.588	101.708	105.398	108.9	100.871	100.733	102.625	102.784	102.333	102.149	105.129	101.331	100.098	100.984	104.465
64.3375	3860.25	5.378	78.322	85.02	108.712	108.935	108.047	107.659	106.398	106.424	108.155	103.114	107.306	106.937	100.692	101.365	102.063	102.545	102.163	99.239	99.941	99.38	100.388	97.62	99.796	110.586	101.808	103.8	104.904	104.969	105.582	103.918	104.216	103.243	102.245	101.645	105.31	108.982	100.737	100.804	102.745	102.706	102.225	102.155	105.037	101.484	100.043	100.996	104.09
[truncated: 48 more columns]

## Sheet: MTP1_well-to-well
Time (h)	Time (min)	A1	A2	A3	A4	A5	A6	A7	A8	A9	A10	A11	A12	B1	B2	B3	B4	B5	B6	B7	B8	B9	B10	B11	B12	C1	C2	C3	C4	C5	C6	C7	C8	C9	C10	C11	C12	D1	D2	D3	D4	D5	D6	D7	D8	D9	D10	D11	D12
0	0	49.698	45.006	45.847	46.718	47.227	47.369	46.673	45.645	45.361	46.5	43.918	46.545	49.931	44.759	44.994	45.651	46.09	46.304	45.945	45.39	45.533	45.571	44.737	45.98	48.81	43.149	44.259	44.222	44.067	44.722	45.104	45.784	45.263	44.398	44.335	45.341	48.551	42.855	44.063	43.057	43.398	43.524	44.073	45.865	43.894	43.016	43.31	44.614
0.0333333	2	49.216	44.635	45.765	46.373	46.506	47.237	46.325	45.743	45.257	46.965	44.498	46.9	49.9	44.553	44.588	45.031	45.694	45.986	45.594	45.42	45.653	45.339	44.865	46.253	48.794	43.049	44.059	44.096	43.867	44.533	44.918	45.68	45.375	44.576	44.678	45.724	48.259	42.553	43.692	42.696	42.894	43.051	43.633	45.639	43.88	43.12	43.508	44.618
0.0666667	4	50.122	45.425	46.68	47.375	47.757	48.388	47.994	46.967	46.496	48.094	45.543	47.708	50.422	45.225	45.396	45.569	46.363	46.622	46.284	45.945	46.386	46.349	46.151	47.298	49.01	43.329	44.347	44.437	44.004	45.047	45.531	45.963	46.002	45.145	45.249	46.208	48.288	42.561	43.59	42.657	43.112	42.867	43.931	45.859	44.375	43.222	43.682	45.004
0.1	6	49.161	44.502	45.437	46.059	46.637	46.776	45.745	45.253	44.627	45.743	44.025	45.847	49.392	44.222	44.416	44.745	45.037	45.19	44.941	44.561	45.318	44.837	44.48	45.712	48.608	42.861	43.943	44.059	43.671	44.114	44.761	45.218	45.155	44.114	44.227	44.882	47.822	42.222	43.424	42.4	42.541	42.804	43.729	45.18	43.316	42.584	43.112	44.047
0.133333	8	49.394	44.633	45.825	46.408	46.706	47.018	46.235	45.482	44.749	46.4	44.086	45.871	49.706	44.582	44.914	45.143	45.62	45.639	45.133	44.739	45.422	45.02	44.473	45.727	48.775	43.273	44.492	44.329	44.267	44.675	45.259	45.661	45.39	44.522	44.416	45.241	47.988	42.398	43.878	42.661	42.927	43.075	44.045	45.435	43.816	42.857	43.194	44.271
0.166667	10	48.49	43.9	45.118	45.614	46.218	46.465	45.61	45.143	44.953	45.914	44.053	45.79	49.061	44.051	44.269	44.682	44.941	45.112	44.79	44.704	45.461	44.973	44.551	45.98	48.41	43.025	44.333	44.139	44.308	44.4	45.161	45.665	45.382	44.418	44.708	45.592	47.582	42.225	43.712	42.555	42.712	43.359	43.79	45.445	43.888	42.984	43.567	44.388
Average		49.3468	44.6835	45.7787	46.4245	46.8418	47.2088	46.4303	45.7055	45.2405	46.6027	44.3538	46.4435	49.7353	44.5653	44.7628	45.1368	45.6242	45.8088	45.4478	45.1265	45.6288	45.3482	44.8762	46.1583	48.7345	43.1143	44.2388	44.2137	44.0307	44.5818	45.1223	45.6618	45.4278	44.5288	44.6022	45.498	48.0817	42.469	43.7265	42.671	42.9307	43.1133	43.8668	45.5705	43.8615	42.9638	43.3955	44.4903
		1	2	3	4	5	6	7	8	9	10	11	12
	A	49.3468	44.6835	45.7787	46.4245	46.8418	47.2088	46.4303	45.7055	45.2405	46.6027	44.3538	46.4435
	B	49.7353	44.5653	44.7628	45.1368	45.6242	45.8088	45.4478	45.1265	45.6288	45.3482	44.8762	46.1583
	C	48.7345	43.1143	44.2388	44.2137	44.0307	44.5818	45.1223	45.6618	45.4278	44.5288	44.6022	45.498
	D	48.0817	42.469	43.7265	42.671	42.9307	43.1133	43.8668	45.5705	43.8615	42.9638	43.3955	44.4903
	E	48.0222	42.8122	43.7448	43.0885	43.1608	43.2755	43.9487	45.6803	43.696	43.039	42.7787	43.9828
	F	47.4883	42.1085	43.295	43.1402	43.5312	43.3815	43.6928	44.2445	44.2092	43.5238	42.4597	43.856
	G	48.5663	43.2655	43.9683	44.5473	44.8715	45.0627	44.663	44.0823	44.9528	44.7608	42.2515	43.8232
	H	47.7313	44.28	44.6578	44.8755	45.0593	44.466	44.3132	43.4665	43.3335	43.6095	41.1637	43.4043
		A1	A2	A3	A4	A5	A6	A7	A8	A9	A10	A11	A12	B1	B2	B3	B4	B5	B6	B7	B8	B9	B10	B11	B12	C1	C2	C3	C4	C5	C6	C7	C8	C9	C10	C11	C12	D1	D2	D3	D4	D5	D6	D7	D8	D9	D10	D11	D12
Well correction factor		0.905055	0.999509	0.975598	0.962026	0.953455	0.946043	0.961905	0.97716	0.987203	0.958348	1.00694	0.961632	0.897985	1.00216	0.997738	0.989471	0.978902	0.974956	0.9827	0.989697	0.978802	0.98486	0.995218	0.967573	0.916426	1.03589	1.00956	1.01013	1.01433	1.00179	0.989789	0.978094	0.983132	1.00298	1.00133	0.981616	0.928869	1.05163	1.02138	1.04665	1.04032	1.03591	1.01812	0.980055	1.01824	1.03952	1.02918	1.00385
[truncated: 48 more columns]

## Sheet: MTP2_well-to-well
Time (h)	Time (min)	A1	A2	A3	A4	A5	A6	A7	A8	A9	A10	A11	A12	B1	B2	B3	B4	B5	B6	B7	B8	B9	B10	B11	B12	C1	C2	C3	C4	C5	C6	C7	C8	C9	C10	C11	C12	D1	D2	D3	D4	D5	D6	D7	D8	D9	D10	D11	D12
0	0	48.082	43.933	45.118	45.802	46.788	47.451	46.661	45.925	46.471	47.516	46.039	47.504	47.88	43.422	46	45.525	45.596	46.404	46.447	45.951	47.58	46.975	46.871	48.6	47.704	42.169	44.024	44.527	44.841	45.302	45.929	47.784	47.869	46.425	46.447	47.847	46.865	41.792	43.037	42.908	43.465	43.304	44.42	47.404	45.818	44.841	45.782	47.016
0.0333333	2	47.953	43.606	44.902	45.624	46.245	47.08	46.049	45.229	45.653	46.951	45.304	46.571	47.757	43.498	45.99	45.341	45.612	46.061	46.173	45.663	47.102	46.533	45.984	47.875	47.584	42.345	44.129	44.416	44.559	45.284	45.759	47.178	47.647	46.11	46.092	47.496	46.647	41.931	43.167	42.851	43.202	43.341	44.057	47.137	45.72	44.529	45.527	46.606
0.0666667	4	49.012	44.275	45.235	46.212	47.486	48.806	48.014	46.494	46.965	48.361	46.514	47.988	48.206	44.171	46.786	46.753	46.396	47.371	47.518	47.045	47.904	47.351	47.275	48.914	48.153	42.892	44.912	45.39	44.886	45.575	45.947	47.82	48.622	46.925	46.867	48.29	47.051	42.547	43.692	43.539	43.939	43.761	43.757	48.692	47.531	45.043	46.118	46.965
0.1	6	49.853	44.514	45.508	46.331	47.878	48.078	48.427	46.51	46.878	48.408	46.818	48.802	48.496	44.369	46.978	46.975	46.58	46.835	46.833	47.118	48.361	47.761	48.153	49.143	48.573	43.186	44.845	45.125	45.302	45.245	46.612	47.994	48.269	47.892	47.337	48.386	47.412	42.771	43.353	43.294	44.402	43.439	43.902	47.98	47.443	45.182	46.28	46.937
0.133333	8	48.518	43.571	44.463	45.31	46.424	46.669	46.318	44.714	44.502	46.216	44.122	46.349	47.631	43.68	46.086	46.108	45.743	45.939	46.116	45.851	47.32	46.057	46.053	47.343	47.951	42.676	44.553	44.625	44.782	45.037	45.5	47.178	47.849	46.606	45.741	47.245	47.084	42.392	43.359	42.722	43.18	43.453	43.804	47.29	46.38	44.235	45.253	45.994
0.166667	10	48.929	44.386	45.314	46.11	46.663	47.827	46.176	44.796	44.192	46.41	44.343	46.792	47.941	44.333	46.986	46.327	45.588	46.159	46.112	45.775	47.629	46.731	46.449	47.643	48.539	42.929	44.739	44.741	44.849	44.851	45.414	47.367	48.449	46.6	46.569	47.539	47.449	42.818	43.829	43.429	43.339	43.131	43.125	48.224	46.62	44.251	45.439	45.653
0.2	12	49.157	44.814	46.467	46.782	47.059	47.837	47.357	45.686	45.461	47.514	45.812	48.271	48.445	44.71	47.578	46.569	46.2	46.635	46.402	46.124	48.147	47.535	47.112	48.871	48.676	43.029	45.098	45.335	44.616	44.908	45.294	46.714	48.669	47.306	47.573	49.098	47.412	42.806	44.188	43.373	42.265	42.739	41.392	47.447	47.994	45.349	46.61	46.861
0.233333	14	49.686	44.571	46.81	46.814	48.925	47.831	47.39	45.882	46.286	48.282	46.469	48.925	48.894	44.867	47.578	46.141	46.316	46.061	45.569	46.482	47.904	47.925	47.671	49.559	48.622	42.861	44.551	44.906	43.727	44.924	44.678	46.639	47.992	47.802	47.814	50.335	47.404	42.58	43.706	42.99	42.32	40.39	41.204	47.065	48.496	46.076	47.651	47.543
Average		48.8987	44.2088	45.4771	46.1231	47.1835	47.6974	47.049	45.6545	45.801	47.4572	45.6776	47.6502	48.1563	44.1312	46.7477	46.2174	46.0039	46.4331	46.3963	46.2511	47.7434	47.1085	46.946	48.4935	48.2253	42.7609	44.6064	44.8831	44.6952	45.1407	45.6416	47.3342	48.1707	46.9582	46.805	48.2795	47.1655	42.4546	43.5414	43.1382	43.264	42.9447	43.2076	47.6549	47.0002	44.9383	46.0825	46.6969
		1	2	3	4	5	6	7	8	9	10	11	12
	A	48.8987	44.2088	45.4771	46.1231	47.1835	47.6974	47.049	45.6545	45.801	47.4572	45.6776	47.6502
	B	48.1563	44.1312	46.7477	46.2174	46.0039	46.4331	46.3963	46.2511	47.7434	47.1085	46.946	48.4935
	C	48.2253	42.7609	44.6064	44.8831	44.6952	45.1407	45.6416	47.3342	48.1707	46.9582	46.805	48.2795
	D	47.1655	42.4546	43.5414	43.1382	43.264	42.9447	43.2076	47.6549	47.0002	44.9383	46.0825	46.6969
	E	47.7446	42.9875	43.5671	43.762	44.232	43.4099	45.769	47.7019	46.6063	45.7381	45.6496	46.1358
	F	46.8192	42.1326	43.5271	43.6674	44.5679	45.3661	45.4265	46.3049	46.9026	45.3901	44.4941	45.7525
	G	47.5597	42.8631	42.9144	44.16	45.2081	46.4838	46.2989	45.743	46.2714	46.5115	44.4076	45.5535
	H	46.1052	42.8925	43.6613	44.3176	44.9619	45.0572	45.3692	44.6532	44.7185	45.3515	42.6835	44.927
		A1	A2	A3	A4	A5	A6	A7	A8	A9	A10	A11	A12	B1	B2	B3	B4	B5	B6	B7	B8	B9	B10	B11	B12	C1	C2	C3	C4	C5	C6	C7	C8	C9	C10	C11	C12	D1	D2	D3	D4	D5	D6	D7	D8	D9	D10	D11	D12
Well correction factor		0.93165	1.03049	1.00175	0.987715	0.965518	0.955116	0.968278	0.997854	0.994662	0.959948	0.997349	0.95606	0.946015	1.0323	0.974518	0.985701	0.990276	0.981121	0.981901	0.984982	0.954195	0.967055	0.970402	0.939435	0.944661	1.06538	1.0213	1.015	1.01927	1.00921	0.998135	0.962443	0.94573	0.970149	0.973326	0.943599	0.965886	1.07306	1.04628	1.05606	1.05299	1.06082	1.05436	0.955968	0.969282	1.01376	0.988586	0.975579
[truncated: 48 more columns]

## Sheet: MTP3_well-to-well
Time (h)	Time (min)	A1	A2	A3	A4	A5	A6	A7	A8	A9	A10	A11	A12	B1	B2	B3	B4	B5	B6	B7	B8	B9	B10	B11	B12	C1	C2	C3	C4	C5	C6	C7	C8	C9	C10	C11	C12	D1	D2	D3	D4	D5	D6	D7	D8	D9	D10	D11	D12
0	0	48.1	43.259	45.68	45.237	45.49	44.08	43.082	43.873	43.714	45.867	43.794	46.057	46.694	43.018	44.38	44.296	42.814	42.171	41.945	43.296	44.563	45.147	44.722	45.949	46.673	42.002	43.1	43.094	40.935	41.598	40.233	41.543	43.827	44.673	44.422	46.157	45.675	41.51	41.627	40.89	39.394	39.716	42.624	43.596	43.855	42.316	43.516	44.151
0.0333333	2	46.965	41.792	44.914	44	44.931	44.11	42.394	42.755	43.629	45.149	43.129	45.465	45.778	42.216	43.445	43.496	42.812	42.361	41.788	42.408	44.488	44.761	44.894	45.767	46.318	41.922	42.902	43.127	39.68	40.78	40.467	40.578	43.125	43.692	43.92	46.253	44.845	40.988	41.669	40.439	39.153	41.171	43.533	42.68	43.018	41.778	43.255	44.371
0.0666667	4	47.753	42.914	44.996	45.376	44.429	41.622	41.014	42.425	43.141	45.631	42.476	44.902	46.284	42.327	44.447	43.259	42.243	41.259	41.092	42.29	44.01	45.029	44.696	45.229	48.039	41.218	42.451	42.306	41.286	40.48	42.68	41.751	41.027	43.99	44.459	45.778	45.988	40.975	40.625	39.133	38.363	41.182	42.694	41.916	42.896	41.976	43.373	44.578
0.1	6	46.949	42.953	44.696	45.706	43.647	40.094	40.071	41.943	43.639	44.4	42.267	45.345	45.957	42.284	45.088	43.059	41.81	41.58	40.502	41.106	44.22	45.365	44.788	46.504	48.002	40.967	41.576	41.722	43.514	42.771	43.802	43.72	40.72	43.065	44.882	46.1	46.255	40.845	39.478	38.382	40.012	40.951	42.163	42.694	40.465	42.451	44.771	44.635
0.133333	8	47.835	43.035	45.7	44.035	41.763	39.255	39.596	39.655	41.322	44.006	41.694	44.553	45.967	43.794	44.233	41.175	40.996	40.288	39.616	40.286	44.063	43.975	44.045	46.098	47.092	41.214	40.178	40.594	42.712	43.361	43.306	44.227	42.078	42.875	43.396	46.92	46.196	40.614	38.7	40.594	41.469	40.457	41.769	44.318	39.882	42.441	43.839	44.137
0.166667	10	46.094	41.851	43.859	41.569	40.12	40.112	38.941	38.782	39.153	43.033	41.116	43.4	45.022	41.724	42.388	41.616	39.692	40.108	40.939	39.643	42.118	42.422	42.522	44.516	45.784	40.657	39.949	42.873	42.425	43.143	42.78	43.929	44.343	40.659	42.704	44.929	45.135	40.384	40.922	42.057	41.169	40.325	41.484	44.516	42.386	41.116	42.647	43.5
0.2	12	45.267	41.047	43.271	41.218	40.316	42.494	41.1	39.788	39.28	42.161	40.98	42.753	44.455	42.037	42.229	41.8	41.924	42.48	42.867	40.92	41.804	40.947	42.608	43.708	45.339	39.41	41.575	43.339	42.231	42.645	42.7	43.661	44.278	40.476	42.671	45.043	45.169	39.661	42.257	41.361	40.631	40.271	41.318	44.002	43.008	40.733	42.222	44.135
0.233333	14	46.449	41.916	44.612	41.545	39.531	42.378	41.843	42.451	39.796	40.508	40.365	43.433	45.71	42.912	42.318	41.235	42.949	42.988	42.759	42.812	41.543	41.1	42.145	44.19	44.739	38.498	43.331	43.18	42.369	42.814	42.865	43.871	44.306	42.414	42.235	45.225	44.912	38.6	41.6	41.01	40.718	40.327	41.696	44.165	42.947	39.784	43.175	44.824
Average		46.9265	42.3459	44.716	43.5858	42.5284	41.7681	41.0051	41.459	41.7092	43.8444	41.9776	44.4885	45.7334	42.539	43.566	42.492	41.905	41.6544	41.4385	41.5951	43.3511	43.5933	43.8025	45.2451	46.4982	40.736	41.8828	42.5294	41.894	42.199	42.3541	42.91	42.963	42.7305	43.5861	45.8006	45.5219	40.4471	40.8597	40.4832	40.1136	40.55	42.1601	43.4859	42.3071	41.5744	43.3498	44.2914
		1	2	3	4	5	6	7	8	9	10	11	12
	A	46.9265	42.3459	44.716	43.5858	42.5284	41.7681	41.0051	41.459	41.7092	43.8444	41.9776	44.4885
	B	45.7334	42.539	43.566	42.492	41.905	41.6544	41.4385	41.5951	43.3511	43.5933	43.8025	45.2451
	C	46.4982	40.736	41.8828	42.5294	41.894	42.199	42.3541	42.91	42.963	42.7305	43.5861	45.8006
	D	45.5219	40.4471	40.8597	40.4832	40.1136	40.55	42.1601	43.4859	42.3071	41.5744	43.3498	44.2914
	E	46.7039	41.6166	40.852	41.3772	41.0279	41.1195	42.653	44.6266	42.9176	43.4539	43.8665	43.7497
	F	46.2154	41.4783	41.5525	41.441	41.6051	42.297	43.2267	43.8961	43.1295	43.4809	42.4838	43.2913
	G	46.4462	42.3129	42.0691	43.1082	42.7615	43.8985	43.4189	42.9234	43.9024	44.5943	42.4372	42.9652
	H	44.6178	41.2523	42.171	43.3591	43.2909	43.0132	43.3351	42.6676	42.5442	43.6831	40.937	42.4405
		A1	A2	A3	A4	A5	A6	A7	A8	A9	A10	A11	A12	B1	B2	B3	B4	B5	B6	B7	B8	B9	B10	B11	B12	C1	C2	C3	C4	C5	C6	C7	C8	C9	C10	C11	C12	D1	D2	D3	D4	D5	D6	D7	D8	D9	D10	D11	D12
Well correction factor		0.91382	1.01267	0.958994	0.983863	1.00832	1.02668	1.04578	1.03433	1.02813	0.978059	1.02155	0.963898	0.937661	1.00807	0.984309	1.00919	1.02332	1.02948	1.03484	1.03095	0.989188	0.983693	0.978994	0.947779	0.922237	1.05269	1.02387	1.0083	1.02359	1.01619	1.01247	0.999357	0.998124	1.00355	0.983854	0.936284	0.942017	1.06021	1.0495	1.05926	1.06902	1.05752	1.01713	0.986122	1.0136	1.03146	0.989219	0.968188
[truncated: 48 more columns]

[truncated: 25 more sheets: MTP4_well-to-well, MTP6_well-to-well, Cal plate contents, MTP1_cal, MTP2_cal, MTP3_cal, MTP4_cal, MTP6_cal, MTP1_cal+wellcorr, MTP2_cal+wellcorr, MTP3_cal+wellcorr, MTP4_cal+wellcorr, MTP6_cal+wellcorr, CAL, MTP1_wellcorr, MTP2_wellcorr, MTP3_wellcorr, MTP4_wellcorr, MTP6_wellcorr, MTP1_OD …]
